# Supplementary material for: De novo design of protein peptides to block association of the SARS-CoV-2 spike protein with human ACE2
Source: publisher site journal article supplement (doi:10.18632/aging.103416), 2020-06-16
Supplement: Supplementary file [file aging-v12i12-103416-supplementary-material-SD1.pdf]

## SUPPLEMENTARY FIGURES

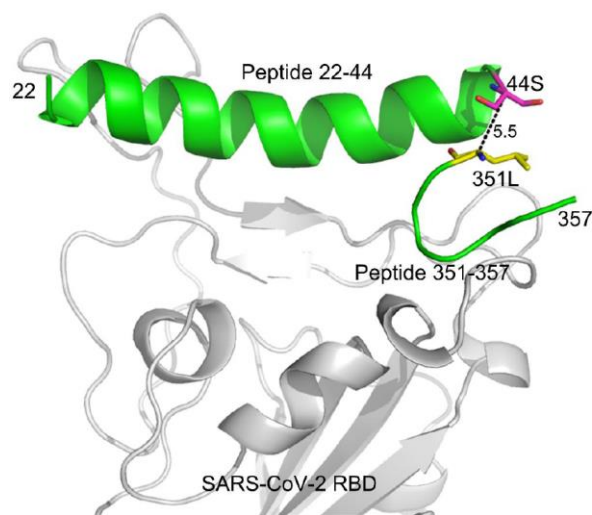

**Supplementary Figure 1. Illustration of the scaffold fragments used for design.** Two discontinuous peptide fragments (a.a. 22-44 and a.a. 351-357) were used for peptide scaffold construction. The hACE2 peptides and SARS-CoV-2 RBD are shown in green and gray, respectively. The residues Ser44 and Leu351 are shown in magenta and yellow sticks, respectively. The distance between the C $\alpha$  atoms of Ser44 and Leu351 is 5.5 Å.

| PDB ID    | Multiple Sequence Alignment                                                                                                      | TM-score |
|-----------|----------------------------------------------------------------------------------------------------------------------------------|----------|
| 1j36A     | -Q-AKEYLENLNKELAKRTNVET-FYLIDDV                                                                                                  | 0.83     |
| 1r41A     | EEQAKTFLDKFNHEADLFYQSS-LGKGDFR                                                                                                   | 0.88     |
| 2c6fA     | EAGAQLFAQSYNSSAEQVLFQSV-FYNRKDF                                                                                                  | 0.84     |
| 2o36A     | DVSYESTLKAADVETVYTVQRN-LQPAIAA                                                                                                   | 0.78     |
| 2o3eA     | EVTYENCLQVLADIEVYIIVERT-LQMSVAA                                                                                                  | 0.77     |
| 3bkkA     | EAEASKFVEEYDRTSQVWNEYA-FYNGKDF                                                                                                   | 0.84     |
| 3ce2A     | SESLLSLLTTLFSIERKLNKLYV-CYDHPY                                                                                                   | 0.71     |
| 4ka7A     | EPTWPKLVEPLEKIVDRLTVVWG-VSRLPVA                                                                                                  | 0.71     |
| 6s1yA     | ETEISQIVEWIEQRYQOTKAHOT-FFAIDDV                                                                                                  | 0.83     |
| Sec.Str.  |                                                                                                                                  |          |
| Wild-type | E22 E23 Q24 A25 K26 T27 F28 L29 D30 K31 F32 N33 H34 E35 A36 E37 D38 L39 F40 Y41 Q42 S43 S44 G L351 G352 K353 G354 D355 F356 R357 |          |

**Supplementary Figure 2. Peptide multiple sequence alignment for evolutionary profile construction.**
