# Supplementary material for: De novo design of protein peptides to block association of the SARS-CoV-2 spike protein with human ACE2
Source: publisher site journal article supplement (doi:10.18632/aging.103416), 2020-06-16
Supplement: Supplementary file [file aging-v12i12-103416-supplementary-material-SD2.pdf]

Supplementary Tables

Table S1. Summary of 992 peptide sequences designed using EvoEF2 only. The table is sorted according to the binding score from the lowest to the highest. '#label' presents the index of the binder among the 1000 low total energy designs.

Table with 5 columns: #label, #peptide, #binding (EEU), #SeqID(%), and #Secondary structure. It lists 992 peptide sequences with their corresponding binding scores, sequence IDs, and secondary structures.

|     |                                  |        |      |                                    |
|-----|----------------------------------|--------|------|------------------------------------|
| 447 | QDEKRIQEDQQRKNEEEDQYQKQGRGKGHP   | -51.65 | 32.3 | CHHHHHHHHHHHHHHHHHHHHHHHHHHCCCCCCC |
| 522 | EQQQR IQEDQRRNDKEHKYYQKQGGQGHQP  | -51.65 | 29.0 | HHHHHHHHHHHHHHHHHHHHHHHHHCCCCCCC   |
| 840 | EQEQRIQDQKNNEEEDERYQKQGRGKGHP    | -51.60 | 38.7 | HHHHHHHHHHHHHHHHHHHHHHHHHCCCCCCC   |
| 126 | EQEERIKQDKMKNEKEDEEYQRRGQKGHQS   | -51.58 | 38.7 | CHHHHHHHHHHHHHHHHHHHHHHHHCCCCCCC   |
| 252 | QDEERIKQDQESNDREDKRYQREGRGKGHP   | -51.55 | 29.0 | CHHHHHHHHHHHHHHHHHHHHHHHHCCCCCCC   |
| 055 | QDQERIKKQDYDNDWEDEERYQKQGRGKGHP  | -51.54 | 32.3 | CHHHHHHHHCCCCCHHHHHHHHHHHCCCCCCC   |
| 822 | QRQQEIQEDAWRHRYEDEEFQQRKGRGKGQN  | -51.50 | 32.3 | HHHHHHHHHHHHHHHHHHHHHHHHHCCCCCCC   |
| 092 | EEEQRKQEDQRRQDKEDQRYQREGRGKGHP   | -51.44 | 35.5 | HHHHHHHHHHHHHHHHHHHHHHHHHCCCCCCC   |
| 899 | EEEEKQQDKRKQEKEDDEEYQRRGKGKGNH   | -51.43 | 41.9 | HHHHHHHHHHHHHHHHHHHHHHHHHCCCCCCC   |
| 536 | EQEQRIQDQKNNEEEDKRYQREGRGKGHP    | -51.42 | 38.7 | HHHHHHHHHHHHHHHHHHHHHHHHHCCCCCCC   |
| 250 | KRQQEIQDQYNDYEHYQYRQKGRGQGHQP    | -51.34 | 29.0 | CHHHHHHHHHHCCCCCHHHHHHHHHHHCCCCCCC |
| 976 | EQEERIQDQQRKNDKEHEEYQRRGWGQGHYP  | -51.32 | 25.8 | CHHHHHHHHHHHHHHHHHHHHHHHHCCCCCCC   |
| 779 | EQEERIQDQQRKNDKEHEEYQYQYGQGQGHQP | -51.32 | 25.8 | CHHHHHHHHHHHHHHHHHHHHHHHHCCCCCCC   |
| 565 | EQEERIQRDQRKNDQECHKRYQREGRGQGHQP | -51.32 | 25.8 | CHHHHHHHHHHHHHHHHHHHHHHHHCCCCCCC   |
| 854 | EQQQRKQEDQRRNDKEHKRYQREGRGKGHP   | -51.31 | 29.0 | HHHHHHHHHHHHHHHHHHHHHHHHHCCCCCCC   |
| 227 | EEEEKQQDKRQNEREDKYYQKQGGQKGHQP   | -51.31 | 41.9 | HHHHHHHHHHHHHHHHHHHHHHHHHCCCCCCC   |
| 037 | EEQQRKQEDKRRNEKEDEEYQKQGGQKGHQP  | -51.26 | 45.2 | HHHHHHHHHHHHHHHHHHHHHHHHHCCCCCCC   |
| 591 | EEEQRKQEDKRRNEKEDKYQYQKYGQKGHQP  | -51.26 | 41.9 | HHHHHHHHHHHHHHHHHHHHHHHHHCCCCCCC   |
| 458 | EEEQRKQEDQRRHWDYSYYQYQYQYQKGHQP  | -51.24 | 38.7 | HHHHHHHHHHHHHHHHHHHHHHHHHCCCCCCC   |
| 266 | EEEEKQRDQYKNDWEDEEYQKGRGKGTNN    | -51.21 | 35.5 | HHHHHHHHHHHHHHHHHHHHHHHHHCCCCCCC   |
| 077 | EEEEKQRDKQKNEKEDKRYQREGRGKGHP    | -51.20 | 41.9 | HHHHHHHHHHHHHHHHHHHHHHHHHCCCCCCC   |
| 020 | EQEERKQDQKQKNEREDKRYQREGKGKGNH   | -51.19 | 38.7 | HHHHHHHHHHHHHHHHHHHHHHHHHCCCCCCC   |
| 967 | EQEERIKQDQYNNRYEDEEYQRRGQKGHQS   | -51.18 | 35.5 | CHHHHHHHHHHCCCCCHHHHHHHHHHHCCCCCCC |
| 961 | QREQEIQERQRREKEDERYQREGQKGHQS    | -51.17 | 25.8 | HHHHHHHHHHHHHHHHHHHHHHHHHCCCCCCC   |
| 549 | EQEERIKQDKYNNYEDDEEYQKGRGKGQN    | -51.16 | 41.9 | CHHHHHHHHHHCCCCCHHHHHHHHHHHCCCCCCC |
| 134 | EQEERIKQDQEKNEKEDEEYQRRGRGKGHP   | -51.15 | 35.5 | CHHHHHHHHHHHHHHHHHHHHHHHHCCCCCCC   |
| 768 | QQENIKQDQKSNEEEDDEEYQKQGGQKGHQP  | -51.15 | 32.3 | CHHHHHHHHHHHHHHHHHHHHHHHHCCCCCCC   |
| 989 | EQEERIQDQQRKNDKEHQRYQKQGRGQGHQP  | -51.14 | 25.8 | CHHHHHHHHHHHHHHHHHHHHHHHHCCCCCCC   |
| 819 | EQEERIKEDQYRNEWEDRYQREGRGKGHP    | -51.14 | 35.5 | HHHHHHHHHHHHHHHHHHHHHHHHHCCCCCCC   |
| 764 | EEQQRKQDQKYNNEWEDKRYQREGRGKGHNN  | -51.13 | 48.4 | HHHHHHHHHHHHHHHHHHHHHHHHHCCCCCCC   |
| 883 | EEEEKQRDKRKNQEDDKRYQREGKGKGNH    | -51.13 | 41.9 | HHHHHHHHHHHHHHHHHHHHHHHHHCCCCCCC   |
| 699 | EEEEKQQDKRKNEDDKRYQREGRGKGHP     | -51.13 | 41.9 | CHHHHHHHHHHHHHHHHHHHHHHHHCCCCCCC   |
| 086 | QEEQKQEDDKRKNKEKEDKRYQKQGWGKGHP  | -51.13 | 41.9 | HHHHHHHHHHHHHHHHHHHHHHHHHCCCCCCC   |
| 208 | EEERRKQEDQERNDKEDKRYQREGRGKGHP   | -51.07 | 35.5 | HHHHHHHHHHHHHHHHHHHHHHHHHCCCCCCC   |
| 448 | QEEQKQYDQEKNDKEDEEYQKGRGKGHP     | -51.07 | 35.5 | HHHHHHHHHHHHHHHHHHHHHHHHHCCCCCCC   |
| 142 | EEERKQEDQYRNDQAEHKRYQREGKGKGNH   | -51.05 | 35.5 | HHHHHHHHHHHHHHHHHHHHHHHHHCCCCCCC   |
| 047 | EEQQRKQEDQRRNDQEDKRYQRYGRGKGHP   | -51.02 | 38.7 | HHHHHHHHHHHHHHHHHHHHHHHHHCCCCCCC   |
| 313 | EQQERKQDQRRNDKEDEEYQRRGQKGNH     | -51.02 | 35.5 | HHHHHHHHHHHHHHHHHHHHHHHHHCCCCCCC   |
| 485 | QEQQKQEDQQRKNDKEDKRYQREGRGKGHP   | -51.02 | 38.7 | HHHHHHHHHHHHHHHHHHHHHHHHHCCCCCCC   |
| 757 | EEEQRKQEDQQRKNDREDKYYQREGKGKGNH  | -51.01 | 35.5 | HHHHHHHHHHHHHHHHHHHHHHHHHCCCCCCC   |
| 043 | EEEEKQRDKQKNEREDEEYQYQYQYQKGHQP  | -51.00 | 45.2 | HHHHHHHHHHHHHHHHHHHHHHHHHCCCCCCC   |
| 388 | EEEQRKQEDKQKNEREDEEYQRRGKGKGNH   | -51.00 | 41.9 | HHHHHHHHHHHHHHHHHHHHHHHHHCCCCCCC   |
| 189 | QRQQEIQEDQQRKNEKEDEEYQRRGRGKGHP  | -50.99 | 35.5 | CHHHHCCHHHHHHHHHHHHHHHHHHHCCCCCCC  |
| 200 | QQEEEIKDQDQNNNEKEDEEYQRYGQKGHQS  | -50.97 | 35.5 | CHHHHHHHHHHHHHHHHHHHHHHHHCCCCCCC   |
| 982 | DEERKQEDKQRNKEDEKRYQREGKGKGNH    | -50.97 | 41.9 | CHHHHHHHHHHHHHHHHHHHHHHHHCCCCCCC   |
| 988 | DDQRIQEDQYRNDYEHEEYQKGRGQGHQP    | -50.96 | 25.8 | CHHHHHHHHHHHHHHHHHHHHHHHHCCCCCCC   |
| 707 | DQERKQEDKRRNEYEDEEYQQRGKGHP      | -50.94 | 38.7 | HHHHHHHHHHHHHHHHHHHHHHHHHCCCCCCC   |
| 709 | EEEEKQQDKRKNKEKEDEEYQRYGRGKGHP   | -50.94 | 41.9 | HHHHHHHHHHHHHHHHHHHHHHHHHCCCCCCC   |
| 914 | EEEEKQQDKRKNENEDKRYQREGKGKGNH    | -50.94 | 41.9 | HHHHHHHHHHHHHHHHHHHHHHHHHCCCCCCC   |
| 759 | EEEQRKQEDDKRKNKEKEDKRYQRYGQKGHQS | -50.94 | 41.9 | HHHHHHHHHHHHHHHHHHHHHHHHHCCCCCCC   |
| 824 | EEEQRKQEDDKRKNENEDKRYQRHGQKGHQS  | -50.94 | 41.9 | HHHHHHHHHHHHHHHHHHHHHHHHHCCCCCCC   |
| 693 | EQQERINQDQKNDKEHEEYQRRGRGQGHQP   | -50.91 | 29.0 | HHHHHHHHHHHHHHHHHHHHHHHHHCCCCCCC   |
| 629 | QEEKKQDQDKNDKEDEEYQRYGQKGHQS     | -50.89 | 35.5 | CHHHHHHHHHHCHHHHHHHHHHHHCCCCCCC    |
| 413 | EEKKKQEDQQRKNDKEDEEYQKGRGKGHP    | -50.89 | 38.7 | HHHHHHHHHHHHHHHHHHHHHHHHHCCCCCCC   |
| 972 | EEKQRKQEDQQRKNDKEDEEYQKEGKGKGNH  | -50.89 | 35.5 | HHHHHHHHHHHHHHHHHHHHHHHHHCCCCCCC   |
| 265 | EEEEKQRDQEKNDKEDEKYQREGRGKGHP    | -50.88 | 35.5 | HHHHHHHHHHHHHHHHHHHHHHHHHCCCCCCC   |
| 900 | EEQKQKQEDKRRNEKEDEEYQRRGWGKGHP   | -50.87 | 45.2 | HHHHHHHHHHHHHHHHHHHHHHHHHCCCCCCC   |
| 479 | EEQKQKQDQDKRSNFEKDYQKQYQKGGQGHQP | -50.87 | 41.9 | HHHHHHHHHHHHHHHHHHHHHHHHHCCCCCCC   |
| 871 | QQQNIQEDQRRNKEHEEYQKKGQGHQP      | -50.84 | 25.8 | HHHHHHHHHHHHHHHHHHHHHHHHHCCCCCCC   |
| 434 | EEEQRKNDQQRKNDKEDEEYQRRGRGKGHP   | -50.83 | 35.5 | HHHHHHHHHHHCHHHHHHHHHHHHCCCCCCC    |
| 347 | EQEERIKQDQWKNWEDEEYQKQGGQKGHQP   | -50.82 | 35.5 | CHHHHHHHHHHHHHHHHHHHHHHHHCCCCCCC   |
| 562 | EEEEKQQDQQRKNDNEDKRYQREGQKGHQS   | -50.82 | 38.7 | CHHHHHHHHHHHHHHHHHHHHHHHHCCCCCCC   |
| 686 | EEEEKQQDQQRKNDKEDEEYQRYGKKGKGNH  | -50.82 | 35.5 | HHHHHHHHHHHHHHHHHHHHHHHHHCCCCCCC   |
| 038 | EEEEKQQDQQRKNDKEDQRYQQRGKGHP     | -50.82 | 35.5 | HHHHHHHHHHHHHHHHHHHHHHHHHCCCCCCC   |
| 527 | EEEEKQQDQQRKNDNEDERYQQRGKGHP     | -50.82 | 35.5 | HHHHHHHHHHHHHCHHHHHHHHHHHHCCCCCCC  |
| 570 | EEEEKQQDQQRKNDNEDKRYQREGRGKGHP   | -50.82 | 35.5 | HHHHHHHHHHHHHHHHHHHHHHHHHCCCCCCC   |
| 104 | EEEEKQQDQQRNDEDEERYQKQGRGKGHP    | -50.82 | 35.5 | HHHHHHHHHHHHHHHHHHHHHHHHHCCCCCCC   |

|     |                                  |        |      |                                          |
|-----|----------------------------------|--------|------|------------------------------------------|
| 254 | EEEEKQQDQRRNDQEDKRYQREGRGKGHP    | -50.82 | 35.5 | HHHHHHHHHHHHHHHHHHHHHHHHHHHHHHHHHCCCCCCC |
| 778 | QEEEEKQQDQRKNDWEDKYYQKKQGKGHP    | -50.82 | 35.5 | CHHHHHHHHHHHHHHHHHHHHHHHHHHHHHHHHCCCCCCC |
| 315 | QEEKKKQEDKRKNEEEDQYQRYGRGKGHP    | -50.81 | 41.9 | HHHHHHHHHHHHHHHHHHHHHHHHHHHHHHHHHCCCCCCC |
| 416 | NDQRRKQEDKERNEKEDKRYQREGRGKGHP   | -50.80 | 38.7 | CHHHHHHHHHHHHHHHHHHHHHHHHHHHHHHHHCCCCCCC |
| 109 | EEEEKQQDQDKNDREHEEYQRYGRGKGHP    | -50.79 | 29.0 | HHHHHHHHHHHHHHHHHHHHHHHHHHHHHHHHHCCCCCCC |
| 019 | EEEEKQQDQRKNDKEDKRYQREGRGKGHP    | -50.75 | 35.5 | HHHHHHHHHHHHHHHHHHHHHHHHHHHHHHHHHCCCCCCC |
| 893 | EEEEKQRDQWKNDEHEEYKQYQGGCGKQN    | -50.74 | 29.0 | HHHHHHHHHHHHHHHHHHHHHHHHHHHHHHHHHCCCCCCC |
| 554 | QDEERKQQDKRRNEYEDKQYQKEGRGKGHP   | -50.73 | 35.5 | CHHHHHHHHHHHHHHHHHHHHHHHHHHHHHHHHCCCCCCC |
| 581 | QDQERIQQDQRKNEYEDEEYQKRGKGDQR    | -50.73 | 41.9 | CHHHHHHHHHHHHHHHHHHHHHHHHHHHHHHHHCCCCCCC |
| 960 | QDEERKQRDKYKNEYEDEEYQKRGKKGKNN   | -50.72 | 32.3 | CHHHHHHHHHHHHHHHHHHHHHHHHHHHHHHHHCCCCCCC |
| 344 | QQQONINEDQRKNDKEHEEYQRRGWGQGHYP  | -50.72 | 25.8 | CHHHHCHHHHHHHHHHHHHHHHHHHHHHHHCCCCCCC    |
| 859 | EEEEKQQDKRKNEKEDDEEYQRRGRGKGHP   | -50.70 | 41.9 | HHHHHHHHHHHHHHHHHHHHHHHHHHHHHHHHHCCCCCCC |
| 396 | EEQQRKQQDQRSNDKEDREFQRRGQGGKGN   | -50.69 | 35.5 | HHHHHHHHHHHCHHHHHHHHHHHHHHCCCCCCC        |
| 739 | DEERKKQEDQWRNDWEDEYQKQGKGHP      | -50.69 | 35.5 | HHHHHHHHHHHHHHHHHHHHHHHHHHHHHHHHHCCCCCCC |
| 516 | EEEEKQQDQRKNDYEHEEKQRKGRGCGKQN   | -50.67 | 25.8 | HHHHHHHHHHHHHHHHHHHHHHHHHHHHHHHHHCCCCCCC |
| 015 | EEEKRKQEDQRKNDKEDDEEYQRRGKGGKHN  | -50.65 | 35.5 | HHHHHHHHHHHHHHHHHHHHHHHHHHHHHHHHHCCCCCCC |
| 550 | EQEQRKQEDQRRNEKEDDEEYQRRGKGGKGN  | -50.62 | 32.3 | HHHHHHHHHHHHHHHHHHHHHHHHHHHHHHHHHCCCCCCC |
| 736 | NDQRIKQDQKNEKEDDEEYQRRGKGGKQH    | -50.59 | 35.5 | CHHHHHHHHHHHHHHHHHHHHHHHHHHHHHHHHCCCCCCC |
| 751 | QREQEIQEKRRNEKEDKRYQRYGRGKGHP    | -50.58 | 32.3 | CHHHHHHHHHHHHHHHHHHHHHHHHHHHHHHHHCCCCCCC |
| 168 | EQQRIQQDQDSNDREQEYQRRGRGQGHQP    | -50.58 | 29.0 | HHHHHHHHHHHCHHHHHHHHHHHHHHCCCCCCC        |
| 947 | EQEQRIQEDQRKNDKEQKRYQREGRGQGHQP  | -50.57 | 25.8 | HHHHHHHHHHHHHHHHHHHHHHHHHHHHHHHHHCCCCCCC |
| 462 | EEEEKQQDQRRHDKEHEEKQRRGRGCGKQN   | -50.56 | 29.0 | HHHHHHHHHHHHHHHHHHHHHHHHHHHHHHHHHCCCCCCC |
| 656 | SDEERIKEDQKRNDDEDRRYQRYGRGKGHP   | -50.55 | 29.0 | CHHHHHHHHHHCHHHHHHHHHHHHHHCCCCCCC        |
| 318 | QEEKKKQEDQRKNDDEEHQRKQKQGGCGKNN  | -50.54 | 25.8 | HHHHHHHHHHHHHHHHHHHHHHHHHHHHHHHHHCCCCCCC |
| 944 | EQQQRKNNDKYNNWEDEEYQKRGKGGKHP    | -50.51 | 45.2 | HHHHHHHCHHCCCCHHHHHHHHHHHHHHCCCCCCC      |
| 844 | SREEQIQREQQSNEREDKRYQREGRGKGHP   | -50.50 | 29.0 | CHHHHHHHHHHHHHHHHHHHHHHHHHHHHHHHHCCCCCCC |
| 497 | EQQERKQQDKRNEKEDDEEYQRRGRGKGHP   | -50.50 | 41.9 | HHHHHHHHHHHHHHHHHHHHHHHHHHHHHHHHHCCCCCCC |
| 898 | EEQQRKQQDYNNDEHEEKQRKGRGCGKQN    | -50.48 | 29.0 | HHHHHHHHHHHHHHHHHHHHHHHHHHHHHHHHHCCCCCCC |
| 880 | QRQKEIQEQRSNDEDEEYQYQGGKGGHP     | -50.46 | 29.0 | HHHHHHHHHHHCHHHHHHHHHHHHHHCCCCCCC        |
| 033 | EEEEKQQDKRRHEYEDQEYQRQGRGKGHP    | -50.45 | 45.2 | HHHHHHHHHHHHHHHHHHHHHHHHHHHHHHHHHCCCCCCC |
| 177 | DNERRIQEEQYRNDWEDERYQRQGGKGGHNS  | -50.44 | 25.8 | CHHHHHHHHHHHHHHHHHHHHHHHHHHHHHHHHCCCCCCC |
| 867 | EEEEKQQDKRRNEWEDEEYQKKGKGGKHP    | -50.42 | 41.9 | HHHHHHHHHHHHHHHHHHHHHHHHHHHHHHHHHCCCCCCC |
| 012 | EEEQQRKQQDYNDWEDERYQRQGGKGGHYP   | -50.41 | 38.7 | HHHHHHHHHHHHHHHHHHHHHHHHHHHHHHHHHCCCCCCC |
| 572 | EEEEKQRDQKKNWEDEKYYQKKGKGGKHP    | -50.39 | 41.9 | HHHHHHHHHHHHHHHHHHHHHHHHHHHHHHHHHCCCCCCC |
| 107 | EEEQQRKQEDKYRNEYEDKRYQKRGKGGHP   | -50.39 | 41.9 | HHHHHHHHHHHHHHHHHHHHHHHHHHHHHHHHHCCCCCCC |
| 641 | KRQEEIQRDQRKNDQEQRYQREGKGGKHN    | -50.39 | 25.8 | CHHHHHHHHHHHHHHHHHHHHHHHHHHHHHHHHCCCCCCC |
| 123 | QEQQKKQEDQRRNDKEDRRYQRYGKGGKHN   | -50.38 | 38.7 | HHHHHHHHHHHHHHHHHHHHHHHHHHHHHHHHHCCCCCCC |
| 968 | EEEQQRKQQDKYNNWEDEKRYQREGRGKGHP  | -50.33 | 45.2 | HHHHHHHHHHHHHHHHHHHHHHHHHHHHHHHHHCCCCCCC |
| 223 | EEEQQRKQQDKYNNWEDEEYQKRGKGGKHP   | -50.33 | 45.2 | HHHHHHHHHHHHHHHHHHHHHHHHHHHHHHHHHCCCCCCC |
| 713 | EQEQRIQEEQYRNEYEDEEYQKRGKGGKHP   | -50.32 | 32.3 | HHHHHHHHHHHHHHHHHHHHHHHHHHHHHHHHHCCCCCCC |
| 084 | EEEEKQQDQKNDREDRRYQRYGRGKGHP     | -50.31 | 35.5 | HHHHHHHHHHHHHHHHHHHHHHHHHHHHHHHHHCCCCCCC |
| 537 | EEQERKQRDQEKNDKEDRRYQREGRGKGHP   | -50.31 | 38.7 | HHHHHHHHHHHHHHHHHHHHHHHHHHHHHHHHHCCCCCCC |
| 955 | EEQQRKQQDQRNNEKEDDEEYQRRGRGKGHP  | -50.31 | 45.2 | HHHHHHHHHHHHHHHHHHHHHHHHHHHHHHHHHCCCCCCC |
| 427 | EEQQRKQQDQRSNEQEDKRYQKEGGKGGHS   | -50.31 | 41.9 | HHHHHHHHHHHHHHHHHHHHHHHHHHHHHHHHHCCCCCCC |
| 026 | EQQQRKQEDQRRNEKEDDEEYQKRGKGGHP   | -50.31 | 38.7 | HHHHHHHHHHHHHHHHHHHHHHHHHHHHHHHHHCCCCCCC |
| 920 | EEERRKQEDQERNKEDRRYQREGKGGKHN    | -50.31 | 35.5 | HHHHHHHHHHHHHHHHHHHHHHHHHHHHHHHHHCCCCCCC |
| 586 | ENEQRIQEDQRKNEKEHKRYQREGRGQGHQP  | -50.31 | 29.0 | CHHHHHHHHHHHHHHHHHHHHHHHHHHHHHHHHCCCCCCC |
| 174 | EQERRKQEDQWRNDYEDEEYQKRGKGGHP    | -50.28 | 32.3 | HHHHHHHHHHHHHHHHHHHHHHHHHHHHHHHHHCCCCCCC |
| 428 | EEQQRKYDQESNRKEDERYQREGRGKGGHP   | -50.28 | 38.7 | HHHHHHHHHHHHHHHHHHHHHHHHHHHHHHHHHCCCCCCC |
| 133 | EQEERIKQDQKNNDEEHERYQQQGRGQGHQP  | -50.26 | 29.0 | CHHHHHHHHHHCHHHHHHHHHHHHHHCCCCCCC        |
| 457 | EEQQRKQEDQWRNDYEDREYQKRGKGGKHP   | -50.26 | 38.7 | HHHHHHHHHHHHHHHHHHHHHHHHHHHHHHHHHCCCCCCC |
| 352 | EEQERKQQDQRKNDYEDREYQKRGKGGKHP   | -50.26 | 38.7 | HHHHHHHHHHHHHHHHHHHHHHHHHHHHHHHHHCCCCCCC |
| 373 | EEEQQRKQEDQRKNDKEDRRYQREGRGKGHP  | -50.25 | 35.5 | HHHHHHHHHHHHHHHHHHHHHHHHHHHHHHHHHCCCCCCC |
| 990 | QREEQIQREQRSNEKEDQEYQKQGGKGGHNN  | -50.25 | 29.0 | CHHHHHHHHHHHHHHHHHHHHHHHHHHHHHHHHCCCCCCC |
| 321 | QREEQIQREQRSNEQEDKRYQKEGRGKGHP   | -50.25 | 29.0 | CHHHHHHHHHHHHHHHHHHHHHHHHHHHHHHHHCCCCCCC |
| 430 | EEEEKQRDQRKQEKEDDEEYQRYGRGKGHP   | -50.24 | 38.7 | HHHHHHHHHHHHHHHHHHHHHHHHHHHHHHHHHCCCCCCC |
| 657 | EEEEKQQDQKNEREDEEYQRRGRGKGHP     | -50.24 | 38.7 | HHHHHHHHHHHHHHHHHHHHHHHHHHHHHHHHHCCCCCCC |
| 853 | EEERKQRDQKNEREDEEYQRRGRGKGHP     | -50.24 | 38.7 | HHHHHHHHHHHHHHHHHHHHHHHHHHHHHHHHHCCCCCCC |
| 552 | EEEQKKQEDQKNEKEDKRYQREGRGKGHP    | -50.24 | 41.9 | HHHHHHHHHHHHHHHHHHHHHHHHHHHHHHHHHCCCCCCC |
| 152 | QQEKKNQEDQKNEREDQRYQKEGGKGGHS    | -50.24 | 32.3 | CHHHHHHHHHHHHHHHHHHHHHHHHHHHHHHHHCCCCCCC |
| 594 | EQQQRIQEDQRRNDKEQEYQKRGKGGHP     | -50.23 | 29.0 | HHHHHHHHHHHHHHHHHHHHHHHHHHHHHHHHHCCCCCCC |
| 452 | EEEEKRRDQEKNDKEDDEEYQKYQGGKGGHNP | -50.22 | 38.7 | CHHHHHHHHHHHHHHHHHHHHHHHHHHHHHHHHCCCCCCC |
| 106 | QREEEIQQQQRKQRNEDEFQREGQGGKGGQS  | -50.22 | 22.6 | CHHHHHHHHHHHHHHHHHHHHHHHHHHHHHHHHCCCCCCC |
| 207 | EEEQQRKQEDQRRNRKEDDEEYQRSGRGKGHP | -50.22 | 38.7 | HHHHHHHHHHHHHHHHHHHHHHHHHHHHHHHHHCCCCCCC |
| 039 | EEEQKKQQDQDNNDREDEEYQRYGRGKGHP   | -50.21 | 41.9 | HHHHHHHHHHHCCCCHHHHHHHHHHHHHHCCCCCCC     |
| 937 | EQEERKNQDQKNEKEDERYQRQGGKGGHS    | -50.19 | 35.5 | HHHHHHHHHHHHHHHHHHHHHHHHHHHHHHHHHCCCCCCC |
| 309 | EEEEKQQDKRRNEFEDKYYQKKGKGGKNN    | -50.19 | 45.2 | HHHHHHHHHHHHHHHHHHHHHHHHHHHHHHHHHCCCCCCC |

|     |                                    |        |      |                                        |
|-----|------------------------------------|--------|------|----------------------------------------|
| 611 | EEQQRKQEDQKRNEEEDERYQRYGRGKGHP     | -50.18 | 41.9 | HHHHHHHHHHHHHHHHHHHHHHHHHHHHHHHHHCCCCC |
| 984 | EEQQRKQEDQWRNEWEDEYYQKYQGKGHP      | -50.18 | 41.9 | HHHHHHHHHHHHHHHHHHHHHHHHHHHHHHHHHCCCCC |
| 559 | EEQQRKQEDQWRNEWEDEYYQKYQGKGHP      | -50.18 | 41.9 | HHHHHHHHHHHHHHHHHHHHHHHHHHHHHHHHHCCCCC |
| 282 | EEQQRKQDQYNNEWEDEYYQRYQREGRGKGHP   | -50.18 | 45.2 | HHHHHHHHHHHHHHHHHHHHHHHHHHHHHHHHHCCCCC |
| 590 | EEEEQRKQDQKSNEEEDERYQKQGRGKGHP     | -50.18 | 38.7 | HHHHHHHHHHHHHHHHHHHHHHHHHHHHHHHHHCCCCC |
| 877 | EEEEERKQDQQRKNEQEDKRYQREGRGKGHP    | -50.18 | 38.7 | HHHHHHHHHHHHHHHHHHHHHHHHHHHHHHHHHCCCCC |
| 971 | EEEEERKQDQQRKNEYEDEEYQRYGRGKGHP    | -50.18 | 38.7 | HHHHHHHHHHHHHHHHHHHHHHHHHHHHHHHHHCCCCC |
| 599 | EEEQRKQEDQQRKNEKEDEKYQKREGRGKGHP   | -50.18 | 38.7 | HHHHHHHHHHHHHHHHHHHHHHHHHHHHHHHHHCCCCC |
| 381 | EEEQRKQEDQQRKNEKEDEKYQKREGRGKGHP   | -50.18 | 38.7 | HHHHHHHHHHHHHHHHHHHHHHHHHHHHHHHHHCCCCC |
| 122 | EEEQRKQEDQRRNEKEDEEYQRYGRGKGHP     | -50.18 | 38.7 | HHHHHHHHHHHHHHHHHHHHHHHHHHHHHHHHHCCCCC |
| 681 | EQEERKQRDQQRKNEKEDEEYQRRGRGKGHP    | -50.18 | 38.7 | HHHHHHHHHHHHHHHHHHHHHHHHHHHHHHHHHCCCCC |
| 332 | QEEKKQDQQRKNEKEDEEYQRYGWGKGHP      | -50.18 | 38.7 | CHHHHHHHHHHHHHHHHHHHHHHHHHHHHHHHHCCCCC |
| 858 | EQEKRKQEDQQRKNEEEDDEFQRRGKGGKGN    | -50.17 | 32.3 | HHHHHHHHHHHHHHHHHHHHHHHHHHHHHHHHHCCCCC |
| 953 | EQEKRKQEDQQRKNEEEDERFQQQGRGKGQN    | -50.17 | 32.3 | HHHHHHHHHHHHHHHHHHHHHHHHHHHHHHHHHCCCCC |
| 468 | QDQERIQDQWKNEWEHKFYQKREGRGKGHP     | -50.12 | 32.3 | CHHHHHHHHHHHHHHHHHHHHHHHHHHHHHHHHCCCCC |
| 647 | EEEEERKQDQKKNDEEDRRYQRYGWGKGHP     | -50.12 | 35.5 | HHHHHHHHHHHHHHHHHHHHHHHHHHHHHHHHHCCCCC |
| 132 | EEEEERKQDQYRNWEDRRYQREGRGKGHP      | -50.12 | 35.5 | HHHHHHHHHHHHHHHHHHHHHHHHHHHHHHHHHCCCCC |
| 727 | EEEEERKQEDQQRKNEDEDRYQREGRGKGHP    | -50.12 | 35.5 | HHHHHHHHHHHHHHHHHHHHHHHHHHHHHHHHHCCCCC |
| 215 | EEEEERKQEDQWRNDEDEEYQKQGRGKGHP     | -50.12 | 35.5 | HHHHHHHHHHHHHHHHHHHHHHHHHHHHHHHHHCCCCC |
| 872 | EEEEERKQRDQKNRREDEERYQREGKGKGNH    | -50.12 | 38.7 | HHHHHHHHHHHHHHHHHHHHHHHHHHHHHHHHHCCCCC |
| 506 | EEERKQEDQYRNRYEDEEYQRYGRGKGHP      | -50.09 | 35.5 | HHHHHHHHHHHHHHHHHHHHHHHHHHHHHHHHHCCCCC |
| 621 | EQERRKQEDQQRNREDEERYQRYGRGKGHP     | -50.09 | 32.3 | HHHHHHHHHHHHHHHHHHHHHHHHHHHHHHHHHCCCCC |
| 075 | EQERRKQEDQYRNRYEDEEYQRYGRGKGHP     | -50.09 | 32.3 | HHHHHHHHHHHHHHHHHHHHHHHHHHHHHHHHHCCCCC |
| 789 | EQEERKRQDQEKNDKEDEEYQRYGQKGHS      | -50.08 | 38.7 | HHHHHHHHHHHHHHHHHHHHHHHHHHHHHHHHHCCCCC |
| 663 | EEQERKRQDQQRKNEDEEYQRRGRGKGHP      | -50.08 | 32.3 | HHHHHHHHHHHHHHHHHHHHHHHHHHHHHHHHHCCCCC |
| 410 | EEEEERKQDQYNNDEDEEFQRYGRGKGQN      | -50.07 | 35.5 | HHHHHHHHHHHHHHHHHHHHHHHHHHHHHHHHHCCCCC |
| 085 | DDQRRIQEDQYRNQWEHDQRYQREGRGKGHP    | -50.06 | 25.8 | CHHHHHHHHHHHHHHHHHHHHHHHHHHHHHHHHCCCCC |
| 939 | EEEEERKQDQQRKNDKEDRRYQREGKGKGNH    | -50.06 | 35.5 | HHHHHHHHHHHHHHHHHHHHHHHHHHHHHHHHHCCCCC |
| 587 | EQEERKQDQRRNDKEDREYQRRGQKGHP       | -50.06 | 32.3 | HHHHHHHHHHHHHHHHHHHHHHHHHHHHHHHHHCCCCC |
| 316 | QEEQKQEDQQRKNDKEDRRYQRYGKGGKGNH    | -50.06 | 35.5 | HHHHHHHHHHHHHHHHHHHHHHHHHHHHHHHHHCCCCC |
| 510 | QEEQKQDQQRKNRWEDEYQKKGQKGGHP       | -50.06 | 35.5 | CHHHHHHHHHHHHHHHHHHHHHHHHHHHHHHHHCCCCC |
| 583 | EEEEERKQRDQKNEKEDKRYQREGRGKGHP     | -50.06 | 38.7 | HHHHHHHHHHHHHHHHHHHHHHHHHHHHHHHHHCCCCC |
| 626 | DEERKQEDQYRNWEDEEYQRYGRGKGHP       | -50.05 | 38.7 | HHHHHHHHHHHHHHHHHHHHHHHHHHHHHHHHHCCCCC |
| 633 | EEEKRKQEDQQRKNEEEDDEEYQRYGRGKGHP   | -50.05 | 38.7 | HHHHHHHHHHHHHHHHHHHHHHHHHHHHHHHHHCCCCC |
| 525 | EEEKRKQEDQQRKNEEEDDEEYQRYGWGKGHP   | -50.05 | 38.7 | HHHHHHHHHHHHHHHHHHHHHHHHHHHHHHHHHCCCCC |
| 803 | EEEKRKQEDQQRKNEEEDDEEYQRYGQGRGKGHP | -50.05 | 38.7 | HHHHHHHHHHHHHHHHHHHHHHHHHHHHHHHHHCCCCC |
| 651 | EEEKRKQEDQQRKNEKEDKEYQKQGGKGGHP    | -50.05 | 38.7 | HHHHHHHHHHHHHHHHHHHHHHHHHHHHHHHHHCCCCC |
| 916 | EEEKRKQEDQQRKNEKEDKEYQKQGGKGGHP    | -50.05 | 38.7 | HHHHHHHHHHHHHHHHHHHHHHHHHHHHHHHHHCCCCC |
| 048 | EEERKQEDQYRNWEDEEYQRYGQGRGKGHP     | -50.05 | 38.7 | HHHHHHHHHHHHHHHHHHHHHHHHHHHHHHHHHCCCCC |
| 523 | EQEERKQEDQQRKNEEEDDEEYQRYGQGRGKGHP | -50.05 | 35.5 | HHHHHHHHHHHHHHHHHHHHHHHHHHHHHHHHHCCCCC |
| 838 | QEEENKQRDQYKNEWEDEEYQRYGRGKGHP     | -50.05 | 35.5 | CHHHHHHHHHHHHHHHHHHHHHHHHHHHHHHHHCCCCC |
| 933 | QEEQKQEDQQRKNEEEDDEEYQRYGQGRGKGHP  | -50.05 | 32.3 | CHHHHHHHHHHHHHHHHHHHHHHHHHHHHHHHHCCCCC |
| 744 | EQEQRKQEDQQRKNEDEDEEYQRYGWGKGHP    | -50.05 | 35.5 | HHHHHHHHHHHHHHHHHHHHHHHHHHHHHHHHHCCCCC |
| 804 | EEEEERKQRDQWKNDWEDQYQKKGQKGGHP     | -50.04 | 35.5 | HHHHHHHHHHHHHHHHHHHHHHHHHHHHHHHHHCCCCC |
| 262 | EEEEERKQDQYKNDWEDERYQKQGRGKGHP     | -50.03 | 35.5 | HHHHHHHHHHHHHHHHHHHHHHHHHHHHHHHHHCCCCC |
| 783 | EEEEQKQEDQQRKNEYEDEEYQRYGRGKGHP    | -50.03 | 41.9 | HHHHHHHHHHHHHHHHHHHHHHHHHHHHHHHHHCCCCC |
| 685 | EEEEERKQDQQRKNEKEDEEYQRRGRGKGHP    | -50.02 | 35.5 | HHHHHHHHHHHHHHHHHHHHHHHHHHHHHHHHHCCCCC |
| 807 | EEEEERKQDQQRKNRWEDEEYQRYGQGRGKGHP  | -50.02 | 35.5 | HHHHHHHHHHHHHHHHHHHHHHHHHHHHHHHHHCCCCC |
| 151 | QEEQKQDQQWKHEWEDEEYQRYGQGRGKGHP    | -50.01 | 41.9 | CHHHHHHHHHHHHHHHHHHHHHHHHHHHHHHHHCCCCC |
| 153 | EEEEERKQEDQYRNWEDEEYQRYGRGKGHP     | -50.00 | 41.9 | HHHHHHHHHHHHHHHHHHHHHHHHHHHHHHHHHCCCCC |
| 205 | EEEEERKQEDQQRKNEKEDKEYQKQGGKGGHP   | -50.00 | 38.7 | HHHHHHHHHHHHHHHHHHHHHHHHHHHHHHHHHCCCCC |
| 211 | EEQEKKQRDQYKNDWEDERYQKQGRGKGHP     | -50.00 | 41.9 | HHHHHHHHHHHHHHHHHHHHHHHHHHHHHHHHHCCCCC |
| 688 | EEEQRKQEDQRRNDKEDRRYQRYGRGKGHP     | -49.99 | 35.5 | HHHHHHHHHHHHHHHHHHHHHHHHHHHHHHHHHCCCCC |
| 547 | EEEQRKQDQRRNNRQEDERYQYQYQGGKGGHP   | -49.99 | 38.7 | HHHHHHHHHHHHHHHHHHHHHHHHHHHHHHHHHCCCCC |
| 892 | DEERKQEDQRRNEQEDKRYQREGGKGGHSH     | -49.99 | 38.7 | CHHHHHHHHHHHHHHHHHHHHHHHHHHHHHHHHCCCCC |
| 421 | EEEEERKQDQQRKNEKEDEEYQRYGQGRGKGHP  | -49.99 | 38.7 | HHHHHHHHHHHHHHHHHHHHHHHHHHHHHHHHHCCCCC |
| 049 | EEEEERKQDQQRKNEKEDEEYQRYGQGRGKGHP  | -49.99 | 38.7 | HHHHHHHHHHHHHHHHHHHHHHHHHHHHHHHHHCCCCC |
| 726 | EEEEERKQDQQRKNEKEDEEYQRYGQGRGKGHP  | -49.99 | 38.7 | HHHHHHHHHHHHHHHHHHHHHHHHHHHHHHHHHCCCCC |
| 330 | EEEEERKQRDQQRKNEEEDKRYQRYGWGKGHP   | -49.99 | 38.7 | HHHHHHHHHHHHHHHHHHHHHHHHHHHHHHHHHCCCCC |
| 879 | EQEERKQDQQRKNEHEDEEYQRYGQGRGKGHP   | -49.99 | 35.5 | HHHHHHHHHHHHHHHHHHHHHHHHHHHHHHHHHCCCCC |
| 919 | EQEQRKQEDQQRKNEKEDEEYQRYGQGRGKGHP  | -49.99 | 35.5 | HHHHHHHHHHHHHHHHHHHHHHHHHHHHHHHHHCCCCC |
| 487 | QEEQKQEDQQRKNEEEDDEEYQRYGRGKGHP    | -49.99 | 38.7 | HHHHHHHHHHHHHHHHHHHHHHHHHHHHHHHHHCCCCC |
| 983 | EEEQRKQDQQRNNEDEEYQRYGQGRGKGHP     | -49.98 | 41.9 | HHHHHHHHHHHHHHHHHHHHHHHHHHHHHHHHHCCCCC |
| 592 | EEEQRKQEDQQRKNEKEDEEYQRYGQGRGKGHP  | -49.98 | 35.5 | HHHHHHHHHHHHHHHHHHHHHHHHHHHHHHHHHCCCCC |
| 847 | EEQEKINRDQKKNDEEHRRYQKQGGKGGHP     | -49.96 | 35.5 | CHHHHHHHHHHHHHHHHHHHHHHHHHHHHHHHHCCCCC |
| 120 | EEEQRKQEDQRRNRKEDEEYQRYGQGRGKGHP   | -49.95 | 35.5 | HHHHHHHHHHHHHHHHHHHHHHHHHHHHHHHHHCCCCC |
| 190 | EQEQRKQDQQRNRQEDERYQRYGRGKGHP      | -49.95 | 32.3 | HHHHHHHHHHHHHHHHHHHHHHHHHHHHHHHHHCCCCC |

|     |                                      |        |      |                                      |
|-----|--------------------------------------|--------|------|--------------------------------------|
| 340 | EEEEERKKQDQEKNDKEDEEYQRKGRGKGHNP     | -49.95 | 35.5 | HHHHHHHHHHHHHHHHHHHHHHHHHCCCCCCCC    |
| 635 | EEEEERKKQDQEKNDKEDKRYQREGKGGKGHNN    | -49.95 | 35.5 | HHHHHHHHHHHHHHHHHHHHHHHHHCCCCCCCC    |
| 414 | EEEEERKQRDQWKNEWHEHEYKQKYQGCGKQN     | -49.93 | 29.0 | HHHHHHHHHHHHHHHHHHHHHHHHHCCCCCCCC    |
| 343 | EEEQKKQEDQRNNEKEDKRYQREGKGGKGHQP     | -49.92 | 41.9 | HHHHHHHHHHHHHHHHHHHHHHHHHCCCCCCCC    |
| 000 | EEEQKKQRDQRKNEKEDKRYQKQGGKGGKQHP     | -49.92 | 41.9 | HHHHHHHHHHHHHHHHHHHHHHHHHCCCCCCCC    |
| 024 | EEEQKKQRDQRKNEQEDERYQRQGGKGGKQHP     | -49.92 | 41.9 | HHHHHHHHHHHHHHHHHHHHHHHHHCCCCCCCC    |
| 365 | EEEQRKQEDQRRNEKEDEYYQKYQGKGGKQHP     | -49.92 | 38.7 | HHHHHHHHHHHHHHHHHHHHHHHHHCCCCCCCC    |
| 443 | QDQQRKQEDQRRNEKEDERYQRQGGKGGKQHP     | -49.92 | 35.5 | CHHHHHHHHHHHHHHHHHHHHHHHHCCCCCCCC    |
| 166 | QDQQRKQEDQRRNEKEDKRYQREGKGGKGHQP     | -49.92 | 35.5 | CHHHHHHHHHHHHHHHHHHHHHHHHCCCCCCCC    |
| 913 | QRQEEIQRQQRSDKEDREYQRRQGGKGGKQHP     | -49.92 | 29.0 | CHHHHHHHHHHHHCSHHHHHHHHHHHCCCCCCCC   |
| 963 | REERIQDQRSDQKQDRRYQRYGRGKGGKQHP      | -49.91 | 29.0 | CHHHHHHHHHHHHHHHHHHHHHHHHCCCCCCCC    |
| 936 | QKQQEIQEQQKRNEEDKRYQRGRGKGGKQHP      | -49.90 | 32.3 | CHHHHHHHHHHHHHHHHHHHHHHHHCCCCCCCC    |
| 042 | EEEEERKQRDQYKNRWEDERYQREGDGGKGGKQHP  | -49.89 | 35.5 | HHHHHHHHHHHHHHHHHHHHHHHHHCCCCCCCC    |
| 644 | EEEEKKKRDKYKNEYDEKEYQRKGRGKGGKQHP    | -49.88 | 45.2 | CHHHHHHHHHHHHHHHHHHHHHHHHCCCCCCCC    |
| 491 | EEEEERKKEDKYNNEWEDEERYQRKGRGKGGKQHP  | -49.88 | 41.9 | HHHHHHHHHHHHHHHHHHHHHHHHHCCCCCCCC    |
| 717 | EEEEERKKQDKYNNEWEDEEYQRKGRGKGGKQHP   | -49.88 | 45.2 | HHHHHHHHHHHHHHHHHHHHHHHHHCCCCCCCC    |
| 627 | EQEERKKQDKQSNEKEDEEYQRRGRGKGGKQHP    | -49.88 | 38.7 | HHHHHHHHHHHHHHHHHHHHHHHHHCCCCCCCC    |
| 811 | DEERKKQEDQWRNEWEDEYYQKYQGKGGKGHNP    | -49.86 | 38.7 | HHHHHHHHHHHHHHHHHHHHHHHHHCCCCCCCC    |
| 385 | EEEEERKKQEDQRNNEEDKRYQRGRGKGGKQHP    | -49.86 | 38.7 | HHHHHHHHHHHHHHHHHHHHHHHHHCCCCCCCC    |
| 057 | EEEQRKQEDQRKNEEDKYYQKQGGKGGKQHP      | -49.86 | 38.7 | HHHHHHHHHHHHHHHHHHHHHHHHHCCCCCCCC    |
| 735 | QEEEEKQRDQYKNEWEDEEYQRKGRGKGGKQHP    | -49.86 | 38.7 | CHHHHHHHHHHHHHHHHHHHHHHHHCCCCCCCC    |
| 476 | QEEEEKQEDQRKNEKEDERYQRRGKGGKGGKQH    | -49.86 | 38.7 | HHHHHHHHHHHHHHHHHHHHHHHHHCCCCCCCC    |
| 420 | QEEEEKQEDQRKNEKEDERYQRRGQGGKGGKHS    | -49.86 | 38.7 | HHHHHHHHHHHHHHHHHHHHHHHHHCCCCCCCC    |
| 322 | EEEQRKNEDQKRNEEHERKQKQGGKGGKGN       | -49.82 | 25.8 | HHHHHHHHHHHHHHHHHHHHHHHHHCCCCCCCC    |
| 131 | EEEEERKKQDQRKNDEEDQRYQKQGGKGGKGHNN   | -49.81 | 35.5 | HHHHHHHHHHHHHHHHHHHHHHHHHCCCCCCCC    |
| 673 | EQEERIQRDQKNEERQKRYQKEGRRQGGKQHP     | -49.80 | 29.0 | HHHHHHHHHHHHHHHHHHHHHHHHHCCCCCCCC    |
| 080 | QREKEIQEQQRKNDEEDRRYQQGGKGGKGHNS     | -49.78 | 25.8 | CHHHHHHHHHHHHHHHHHHHHHHHHCCCCCCCC    |
| 016 | EEEEKKKRDKYKNDYDEEYQRQGRGKGGKQHP     | -49.76 | 38.7 | CHHHHHHHHHHHHHHHHHHHHHHHHCCCCCCCC    |
| 857 | EEEEKKKRDKYNNDAEDKRYQREGKGGKGGKQHP   | -49.76 | 45.2 | CHHHHHHHHHHHCHHHHHHHHHHHHCCCCCCCC    |
| 921 | EEEEERKKQDKNNDEEDERYQQGGKGGKGGKHP    | -49.76 | 38.7 | HHHHHHHHHHHHHHHHHHHHHHHHHCCCCCCCC    |
| 946 | EEEEERKKQDQNNKEDERYQRRGRGKGGKQHP     | -49.76 | 38.7 | HHHHHHHHHHHHHCSCHHHHHHHHHHHHCCCCCCCC |
| 124 | EEEEERKKQDQYNNWEDERYQRKGRGKGGKQHP    | -49.76 | 38.7 | HHHHHHHHHHHHHCSCHHHHHHHHHHHHCCCCCCCC |
| 593 | EQEERKKEDQYRNDYDEEYQRKGRGKGGKQHP     | -49.76 | 32.3 | HHHHHHHHHHHHHHHHHHHHHHHHHCCCCCCCC    |
| 773 | EEEEERKQDQRKNEKEDQRYQREGKGGKGGKGHNN  | -49.75 | 38.7 | HHHHHHHHHHHHHHHHHHHHHHHHHCCCCCCCC    |
| 130 | EEEEERKKQDQEKNDKEDERYQKQGGKGGKGHNN   | -49.75 | 35.5 | HHHHHHHHHHHHHHHHHHHHHHHHHCCCCCCCC    |
| 357 | EEEEERKKQDQEKNDKEDKRYQKEGKGGKGGKGHNN | -49.75 | 35.5 | HHHHHHHHHHHHHHHHHHHHHHHHHCCCCCCCC    |
| 897 | EEEQRKQEDQKRNEEDERYQKQGGKGGKGGKQHP   | -49.73 | 35.5 | HHHHHHHHHHHHHHHHHHHHHHHHHCCCCCCCC    |
| 926 | EEQERKNQDQWKHEWEDEYYQKYQGKGGKGGKQHP  | -49.71 | 45.2 | HHHHHHHHHHHHHHHHHHHHHHHHHCCCCCCCC    |
| 125 | EEQERKKQEDQYRNDYDEEYQRKGRGKGGKQHP    | -49.70 | 38.7 | HHHHHHHHHHHHHHHHHHHHHHHHHCCCCCCCC    |
| 912 | QDQERKKQDKYKNEWEHEEYQRKGRGKGGKGHNP   | -49.69 | 32.3 | CHHHHHHHHHHHHHHHHHHHHHHHHCCCCCCCC    |
| 029 | EQEKRIQEDQRKNDEEQRRYQNEGKGGKGGKGHNN  | -49.68 | 25.8 | HHHHHHHHHHHHHHHHHHHHHHHHHCCCCCCCC    |
| 059 | EEEEKKKRDKYKNEWEDEKRYQREGKGGKGGKQHP  | -49.68 | 45.2 | CHHHHHHHHHHHHHHHHHHHHHHHHCCCCCCCC    |
| 179 | QEEQKKQEDQRKNEKEDKRYQRGRGKGGKQHP     | -49.66 | 38.7 | HHHHHHHHHHHHHHHHHHHHHHHHHCCCCCCCC    |
| 113 | SDQERKQRDQKNEEEDQRYQRYGWGGKGGKHP     | -49.66 | 35.5 | CHHHHHHHHHHHHHHHHHHHHHHHHCCCCCCCC    |
| 425 | EEEEERKKQDKYNNEWEHKKRQREGQGGKGGKQHP  | -49.66 | 35.5 | HHHHHHHHHHHHHHHHHHHHHHHHHCCCCCCCC    |
| 729 | EREKRYQEDQRKNEEDKRYQRGRGKGGKGGKHP    | -49.66 | 32.3 | CHHHHHHHHHHHHHHHHHHHHHHHHCCCCCCCC    |
| 878 | EEEEKKKRDKKNEEEDKRYQKEGRRGKGGKQHP    | -49.64 | 45.2 | CHHHHHHHHHHHHHHHHHHHHHHHHCCCCCCCC    |
| 455 | EQERRKQEDQQRNEDKRYQREGQGGKGGKQHP     | -49.63 | 35.5 | HHHHHHHHHHHHHHHHHHHHHHHHHCCCCCCCC    |
| 240 | QQQQNIQEQRRRHEKEDERYQRQGGKGGKGGKHP   | -49.63 | 35.5 | HHHHHHHHHHHHHHHHHHHHHHHHHCCCCCCCC    |
| 520 | EEEEERKQRDQWKNEWEDQYQKGGKGGKGGKGHNN  | -49.62 | 38.7 | HHHHHHHHHHHHHHHHHHHHHHHHHCCCCCCCC    |
| 247 | EEEEKKQRDKYKNEWEDRRYQREGKGGKGGKGHNN  | -49.61 | 45.2 | CHHHHHHHHHHHHHHHHHHHHHHHHCCCCCCCC    |
| 503 | EEQKKQRDQKNEEEDKRYQRGRGKGGKQHP       | -49.59 | 45.2 | HHHHHHHHHHHHHHHHHHHHHHHHHCCCCCCCC    |
| 139 | EEEQRKQKQDESNEREDEEYQKYQGKGGKGGKQHP  | -49.56 | 38.7 | HHHHHHHHHHHHHHHHHHHHHHHHHCCCCCCCC    |
| 987 | QREEEIQRDKRNEKEQEYQRRGRGQGGKQHP      | -49.56 | 25.8 | CHHHHHHHHHHHHHHHHHHHHHHHHCCCCCCCC    |
| 172 | EQQRKQEEKRRNEKEDQYQERGRGKGGKQHP      | -49.55 | 38.7 | HHHHHHHHHHHHHHHHHHHHHHHHHCCCCCCCC    |
| 051 | EQQRKQEEKRRNEKEDKRYQREGKGGKGGKQHP    | -49.55 | 38.7 | HHHHHHHHHHHHHHHHHHHHHHHHHCCCCCCCC    |
| 535 | EEQQRKQDQKRNNENEHKKRYQRGRGQGGKQHP    | -49.54 | 41.9 | HHHHHHHHHHHHHHHHHHHHHHHHHCCCCCCCC    |
| 219 | EEEEERKKQEDQRKNEEDKRYQKEGRRGKGGKQHP  | -49.53 | 38.7 | HHHHHHHHHHHHHHHHHHHHHHHHHCCCCCCCC    |
| 069 | EEEEKKQDQKRNEEEDKRYQRGRGKGGKGHNP     | -49.53 | 41.9 | CHHHHHHHHHHHHHHHHHHHHHHHHCCCCCCCC    |
| 683 | EEERRKQEDQYRNDSEDRRYQRGRGKGGKQHP     | -49.52 | 35.5 | HHHHHHHHHHHHHHHHHHHHHHHHHCCCCCCCC    |
| 198 | EEEEERKQRDQRRHDQEHKRYQREGGQGGKQHP    | -49.52 | 32.3 | HHHHHHHHHHHHHHHHHHHHHHHHHCCCCCCCC    |
| 001 | QEEQKKQEDQRRHDKEHNRQREGGQGGKQHP      | -49.52 | 32.3 | HHHHHHHHHHHHHHHHHHHHHHHHHCCCCCCCC    |
| 400 | EEEEERKQEDQRKNEEEDERYQKYQGKGGKGGKHP  | -49.52 | 35.5 | HHHHHHHHHHHHHHHHHHHHHHHHHCCCCCCCC    |
| 745 | EEEEERKKQDQKNEEDKRYQKEGRRGKGGKQHP    | -49.49 | 38.7 | HHHHHHHHHHHHHHHHHHHHHHHHHCCCCCCCC    |
| 668 | ENEQRKQEKRSNEEDKEYQRKGRGKGGKGTQN     | -49.48 | 35.5 | CHHHHHHHHHHHHHHHHHHHHHHHHCCCCCCCC    |
| 825 | EREERYQDQKRKNEWEDKYYQGGKGGKGGKQHP    | -49.47 | 38.7 | CHHHHHHHHHHHHHHHHHHHHHHHHCCCCCCCC    |
| 538 | EEEEERKQDQKRNEKEDKEYQKRGDGGKGGKQHP   | -49.47 | 38.7 | HHHHHHHHHHHHHHHHHHHHHHHHHCCCCCCCC    |

|     |                                   |        |      |                                     |
|-----|-----------------------------------|--------|------|-------------------------------------|
| 348 | EEEEERKQRDQYKNEYEDEEYQRKGRGKGHP   | -49.46 | 38.7 | HHHHHHHHHHHHHHHHHHHHHHHHHHHHCCCCCCC |
| 149 | EEEQRKQDQESNKREDEEYQRRGRGKGHP     | -49.45 | 35.5 | HHHHHHHHHHHHHHHHHHHHHHHHHHHHCCCCCCC |
| 787 | EQQQRKQEDDKRKNEEEDKYYQKQGGKGNQN   | -49.43 | 41.9 | HHHHHHHHHHHHHHHHHHHHHHHHHHHHCCCCCCC |
| 839 | QQEKNIQEDQKNEEERQERYQKQGRGQGHQP   | -49.43 | 25.8 | CHHHHHHHHHHHHHHHHHHHHHHHHHHHCCCCCCC |
| 115 | EEQQKKQRDQKNDKEHQRFRYQRYGKGQGHNN  | -49.43 | 35.5 | HHHHHHHHHHHHHHHHHHHHHHHHHHHHCCCCCCC |
| 624 | DEERKKQEDQRRNEKEDEEYQRKGRGKGHP    | -49.42 | 38.7 | CHHHHHHHHHHHHHHHHHHHHHHHHHHHCCCCCCC |
| 614 | EEEEERKQDQKRNKEKEHKRYQREGRQGHQP   | -49.41 | 35.5 | HHHHHHHHHHHHHHHHHHHHHHHHHHHHCCCCCCC |
| 305 | QEEQKKQEDDKRKNEKEHKRYQREGRQGHQP   | -49.41 | 35.5 | HHHHHHHHHHHHHHHHHHHHHHHHHHHHCCCCCCC |
| 232 | EQEQRKQEDQRRNEKEDKRYQREGRQGHQP    | -49.40 | 35.5 | HHHHHHHHHHHHHHHHHHHHHHHHHHHHCCCCCCC |
| 031 | EQQQRKQEDQKNDREHRRYQNRQGRGKGHP    | -49.40 | 35.5 | HHHHHHHHHHHHHHHHHHHHHHHHHHHHCCCCCCC |
| 454 | EEERIQDQDRKNRKEDDEEYQRRGRGKGHP    | -49.39 | 32.3 | CHHHHHHHHHHHHHHHHHHHHHHHHHHHCCCCCCC |
| 470 | EEEERKQEDQKRNNEEEDERYQRYGWGKGHP   | -49.38 | 38.7 | HHHHHHHHHHHHHHHHHHHHHHHHHHHHCCCCCCC |
| 364 | EQEQRKQDQKRNNEEEDERYQRRQGRGKGHP   | -49.38 | 38.7 | HHHHHHHHHHHHHHHHHHHHHHHHHHHHCCCCCCC |
| 073 | EQEQRKQDQYNNEWEDEEYQRKGRGKGHP     | -49.38 | 38.7 | HHHHHHHHHHHHHHHHHHHHHHHHHHHHCCCCCCC |
| 249 | QQEENIQRDQKNEKEQEYQRRGRGQGHQP     | -49.37 | 25.8 | CHHHHHHHHHHHHHHHHHHHHHHHHHHHCCCCCCC |
| 981 | EEEEERKQDQKNDREHRRYQREGRQGHQP     | -49.36 | 29.0 | HHHHHHHHHHHHHHHHHHHHHHHHHHHHCCCCCCC |
| 743 | EEEKRKQEDQKNEEEDERYQRQKGGKGTNR    | -49.35 | 41.9 | HHHHHHHHHHHHHHHHHHHHHHHHHHHHCCCCCCC |
| 935 | EEEERKQDQKRNNEWEDEEYQRRGRGQGHQP   | -49.34 | 41.9 | HHHHHHHHHHHHHHHHHHHHHHHHHHHHCCCCCCC |
| 209 | EEEEERKQDKRNNEEEDRRFRYQRYGKGKQN   | -49.33 | 38.7 | HHHHHHHHHHHHHHHHHHHHHHHHHHHHCCCCCCC |
| 366 | EQQQRKQEDQWRNDEHEEYQRRGRGQGHQP    | -49.30 | 29.0 | HHHHHHHHHHHHHHHHHHHHHHHHHHHHCCCCCCC |
| 951 | EEQQRKQEDQKNDREHRRYQRYGQGHQP      | -49.30 | 32.3 | HHHHHHHHHHHHHHHHHHHHHHHHHHHHCCCCCCC |
| 437 | EEEEERKQDQYKNEYEDEEYQRKGRGKGHP    | -49.30 | 38.7 | HHHHHHHHHHHHHHHHHHHHHHHHHHHHCCCCCCC |
| 985 | EQEERKKRQDQKRNNEWEDEEYQRRGRGQGHQP | -49.30 | 35.5 | HHHHHHHHHHHHHHHHHHHHHHHHHHHHCCCCCCC |
| 790 | EEEEERKQDQKNDNEHEERYQRRGRGQGHQP   | -49.29 | 32.3 | CHHHHHHHHHHHHHHHHHHHHHHHHHHHCCCCCCC |
| 096 | EEEEERKQDQKNDNEHEERYQRRGRGQGHQP   | -49.29 | 29.0 | HHHHHHHHHHHHHHHHHHHHHHHHHHHHCCCCCCC |
| 870 | EEEEERKQDQKNDDEHRRYQRYGWGQGHYP    | -49.29 | 29.0 | HHHHHHHHHHHHHHHHHHHHHHHHHHHHCCCCCCC |
| 224 | EEEQKKQEDQKNDKEHRRYQREGRQGHQP     | -49.29 | 32.3 | HHHHHHHHHHHHHHHHHHHHHHHHHHHHCCCCCCC |
| 389 | EEEQRKQEDQKNDKEHRRYQREGRQGHQP     | -49.29 | 29.0 | HHHHHHHHHHHHHHHHHHHHHHHHHHHHCCCCCCC |
| 814 | EEQQRKQEDQKRNNEEEDKRYQREGDGKGNQN  | -49.25 | 41.9 | HHHHHHHHHHHHHHHHHHHHHHHHHHHHCCCCCCC |
| 776 | EEEEERKQDQKRNNEEEDRRFRYQRYGKGKQN  | -49.23 | 41.9 | HHHHHHHHHHHHHHHHHHHHHHHHHHHHCCCCCCC |
| 074 | EEERKKQEDAYRNRYEDEEYQRKGRGKGHP    | -49.22 | 35.5 | HHHHHHHHHHHHHHHHHHHHHHHHHHHHCCCCCCC |
| 993 | EQEKRIQEDQKRNNEEEDRRFRYQRYGKGKHP  | -49.21 | 25.8 | HHHHHHHHHHHHHHHHHHHHHHHHHHHHCCCCCCC |
| 101 | KQQQEKQEDQRRNDKEHEEYQRRGRGQGHNN   | -49.20 | 25.8 | CHHHHHHHHHHHHHHHHHHHHHHHHHHHCCCCCCC |
| 682 | EEEEERKQKQYSEEWQHRRYQREGRQGHQP    | -49.19 | 29.0 | CHHHHHHHHHHHHHHHHHHHHHHHHHHHCCCCCCC |
| 884 | DEERKKQEDQYRNDWEHEEYQRKGRGQGHQP   | -49.17 | 29.0 | HHHHHHHHHHHHHHHHHHHHHHHHHHHHCCCCCCC |
| 750 | EEEEERKQEDQKNDDEHRRYQREGRQGHYP    | -49.17 | 29.0 | HHHHHHHHHHHHHHHHHHHHHHHHHHHHCCCCCCC |
| 351 | EQEERKQDQKNDNEEHRNRYQRYGQGHQP     | -49.17 | 25.8 | HHHHHHHHHHHHHHHHHHHHHHHHHHHHCCCCCCC |
| 426 | EEQQRKQDQKRNNEKEHRRYQRRGRGQGHQP   | -49.15 | 38.7 | HHHHHHHHHHHHHHHHHHHHHHHHHHHHCCCCCCC |
| 374 | EEEEERKQDQKRNNEEEDERYQREGRQGHQP   | -49.15 | 35.5 | HHHHHHHHHHHHHHHHHHHHHHHHHHHHCCCCCCC |
| 192 | EEEEERKQDQKNDREHRRYQRRGRGQGHQP    | -49.13 | 29.0 | HHHHHHHHHHHHHHHHHHHHHHHHHHHHCCCCCCC |
| 558 | EQEERKQDQKNDKEDRRYQREGRQGHNNN     | -49.13 | 32.3 | HHHHHHHHHHHHHHHHHHHHHHHHHHHHCCCCCCC |
| 832 | EQEQRKQEDQRSNDEEDEEYQRYGQGHQP     | -49.12 | 29.0 | HHHHHHHHHHHHHHHHHHHHHHHHHHHHCCCCCCC |
| 541 | DEERKKNEDEKRNNEHEEYQRRGRGQGHQP    | -49.11 | 35.5 | HHHHHHHHHHHHHHHHHHHHHHHHHHHHCCCCCCC |
| 998 | EEEEERKQDQKNEKEDKRYQREGRQGHQP     | -49.11 | 41.9 | CHHHHHHHHHHHHHHHHHHHHHHHHHHHCCCCCCC |
| 304 | EEEEERKQDQKNEKNEEEDERYQRRGRGKGHP  | -49.11 | 38.7 | CHHHHHHHHHHHHHHHHHHHHHHHHHHHCCCCCCC |
| 924 | EEEQKKQEDQKNDKEHEEYQRYGQGHQP      | -49.10 | 32.3 | HHHHHHHHHHHHHHHHHHHHHHHHHHHHCCCCCCC |
| 253 | EQEERKQDQKRNNEWEDEEYQRKGRGKGHP    | -49.05 | 35.5 | HHHHHHHHHHHHHHHHHHHHHHHHHHHHCCCCCCC |
| 786 | EEEEERKQDQKRNNEWEDEEYQRRGRGQGHQP  | -49.05 | 35.5 | HHHHHHHHHHHHHHHHHHHHHHHHHHHHCCCCCCC |
| 267 | EQEQRKQEDQRRNDKEHRRYQRRGRGQGHYP   | -49.03 | 25.8 | HHHHHHHHHHHHHHHHHHHHHHHHHHHHCCCCCCC |
| 283 | EQEERIQRDQKRNNEWEQQYQKKGQGHQP     | -49.00 | 29.0 | HHHHHHHHHHHHHHHHHHHHHHHHHHHHCCCCCCC |
| 948 | EEEEERKQRDQKNDKEHEEYQRRGRGQGHQP   | -49.00 | 29.0 | CHHHHHHHHHHHHHHHHHHHHHHHHHHHCCCCCCC |
| 474 | EEEEERKQRDQKNDKEHRRYQREGRQGHNN    | -49.00 | 38.7 | CHHHHHHHHHHHHHHHHHHHHHHHHHHHCCCCCCC |
| 368 | EQEERKQDQKNDKEDREYQKRGWGKGHP      | -49.00 | 35.5 | HHHHHHHHHHHHHHHHHHHHHHHHHHHHCCCCCCC |
| 431 | QEEENKQEDQKNDKEDREYQKRGKGHP       | -49.00 | 32.3 | CHHHHHHHHHHHHHHHHHHHHHHHHHHHCCCCCCC |
| 379 | EQEERKQDQKNDKNEEEDKRYQKGGQGHQP    | -49.00 | 32.3 | HHHHHHHHHHHHHHHHHHHHHHHHHHHHCCCCCCC |
| 164 | EQEERKQEDQWRNNEWEDEEYQRYGQGHQP    | -49.00 | 32.3 | HHHHHHHHHHHHHHHHHHHHHHHHHHHHCCCCCCC |
| 338 | QEEENKQDQYNNRYEDEEYQRKGRGKGHP     | -49.00 | 32.3 | CHHHHHHHHHHHHHHHHHHHHHHHHHHHCCCCCCC |
| 004 | QQENKKQDQYNNRYEDEEYQRKGRGKGHP     | -48.99 | 32.3 | CHHHHHHHHHHHHHHHHHHHHHHHHHHHCCCCCCC |
| 689 | EEEEERKQDQKRNNEEEDERYQRRGRQGHQP   | -48.99 | 35.5 | HHHHHHHHHHHHHHHHHHHHHHHHHHHHCCCCCCC |
| 860 | EREERYQDQKRNNEEEDERYQREGRQGHQP    | -48.99 | 32.3 | CHHHHHHHHHHHHHHHHHHHHHHHHHHHCCCCCCC |
| 582 | EEEEERKQDQKRNNEEEDERYQRRGRGQGHQP  | -48.98 | 38.7 | HHHHHHHHHHHHHHHHHHHHHHHHHHHHCCCCCCC |
| 119 | EEEEERKQDQYKNEAEDERYQRRGRGQGHQP   | -48.98 | 41.9 | HHHHHHHHHHHHHHHHHHHHHHHHHHHHCCCCCCC |
| 652 | EEEEERKQDQYRNNEWEDEEYQRKGRGKGHP   | -48.98 | 38.7 | HHHHHHHHHHHHHHHHHHHHHHHHHHHHCCCCCCC |
| 788 | EEEKRKQEDQKNDKEHRRYQKGGQGHNN      | -48.97 | 29.0 | HHHHHHHHHHHHHHHHHHHHHHHHHHHHCCCCCCC |
| 734 | EQEERKQRDQYKNDWEHEEYQRKGRGQGHQP   | -48.97 | 25.8 | HHHHHHHHHHHHHHHHHHHHHHHHHHHHCCCCCCC |
| 440 | EQEERIQRDQKNDKEHRRYQREGRQGHNN     | -48.97 | 25.8 | CHHHHHHHHHHHHHHHHHHHHHHHHHHHCCCCCCC |
| 505 | ERQQRYQDQYNNNEWEDKRYQREGRQGHQP    | -48.96 | 41.9 | CHHHHHHHHHHHHHHHHHHHHHHHHHHHCCCCCCC |

|     |                                     |        |      |                                         |
|-----|-------------------------------------|--------|------|-----------------------------------------|
| 864 | ERQQRYQQDQYNNEYEDEEYQRKGRGKGNP      | -48.96 | 41.9 | CHHHHHHHHHHCCCHHHHHHHHHHCCCCCCCC        |
| 970 | EEQERKKEDQYRNRFEDEYYQQKQGKGHQP      | -48.95 | 38.7 | HHHHHHHHHHHHHHHHHHHHHHHHHHHHHHHCCCCCCCC |
| 571 | EEEEERKKEDDKRNEEEDKRYQRYGRGKGNQ     | -48.94 | 41.9 | HHHHHHHHHHHHHHHHHHHHHHHHHHHHHHHCCCCCCCC |
| 359 | EEEEERKKQRDQYKNEWEDDEEYQRKGRGKGHQP  | -48.93 | 38.7 | HHHHHHHHHHHHHHHHHHHHHHHHHHHHHHHCCCCCCCC |
| 645 | EEEEKKKRDQYNNREDEEYQRKQGKGKGNH      | -48.93 | 45.2 | CHHHHHHHHHHHHHHHHHHHHHHHHHHHHHHCCCCCCCC |
| 465 | EEEEERKKEDQWKNEWEDSYQQYGGKGGHQP     | -48.93 | 38.7 | HHHHHHHHHHHHHHHHHHHHHHHHHHHHHHHCCCCCCCC |
| 975 | EEEEERKKEDQYRNEYEDKSYQRYGRGKGGHQP   | -48.93 | 38.7 | HHHHHHHHHHHHHHHHHHHHHHHHHHHHHHHCCCCCCCC |
| 680 | EEEEERKKQDQYNNREDEEYQRKGRGKGGHQP    | -48.93 | 41.9 | HHHHHHHHHHHHHHHHHHHHHHHHHHHHHHHCCCCCCCC |
| 324 | EEEEERKKQDQYNNREDEEYQRKGRGKGGHQP    | -48.93 | 41.9 | HHHHHHHHHHHHHHHHHHHHHHHHHHHHHHHCCCCCCCC |
| 071 | EQEERKKQDQYNNREDEEYQRKGRGKGGHQP     | -48.93 | 38.7 | HHHHHHHHHHHHHHHHHHHHHHHHHHHHHHHCCCCCCCC |
| 451 | EQEERKKEDQYRNEWEDERYQQEGRGKGGHQP    | -48.93 | 38.7 | CHHHHHHHHHHHHHHHHHHHHHHHHHHHHHHCCCCCCCC |
| 169 | EEEEKKRQDMKNNREDEERYQRYGWGKGHYP     | -48.91 | 41.9 | CHHHHHHHHHHHHHHHHHHHHHHHHHHHHHHCCCCCCCC |
| 515 | EEEEERKQRQQRKQDQEDRRYQREGKGGKGNH    | -48.91 | 32.3 | HHHHHHHHHHHHHHHHHHHHHHHHHHHHHHHCCCCCCCC |
| 724 | QDQERKQDQQRKNDYEHEEYQRKGRGQGGHQP    | -48.90 | 25.8 | CHHHHHHHHHHHHHHHHHHHHHHHHHHHHHHCCCCCCCC |
| 911 | EEERRKQEDAYRNRYEDEEYQRKGRGKGGHQP    | -48.90 | 35.5 | HHHHHHHHHHHHHHHHHHHHHHHHHHHHHHHCCCCCCCC |
| 845 | QEEKKKQEDARKNRQEDQRYQREGRGGKGGHQP   | -48.90 | 35.5 | HHHHHHHHHHHHHHHHHHHHHHHHHHHHHHHCCCCCCCC |
| 170 | EEEQRKNEQARQERREDEEYQRKGRGKGGHQP    | -48.87 | 32.3 | HHHHHHHHHHHHHHHHHHHHHHHHHHHHHHHCCCCCCCC |
| 696 | EEQEKKNDQKNDKEHKRYQRYGRGQGGHQP      | -48.87 | 35.5 | HHHHHHHHHHHHHHHHHHHHHHHHHHHHHHHCCCCCCCC |
| 661 | EEEEERKQDARKNRDEDEEYQRRGRGKGGHQP    | -48.83 | 35.5 | HHHHHHHHHHHHHHHHHHHHHHHHHHHHHHHCCCCCCCC |
| 902 | EEEEERKKQDQWKNEWHEKYKQKKGQGGKGN     | -48.83 | 29.0 | HHHHHHHHHHHHHHHHHHHHHHHHHHHHHHHCCCCCCCC |
| 337 | EREERYQRDQYKNEYEDEEYQRKGRGKGGHQP    | -48.82 | 35.5 | CHHHHHHHHHHHHHHHHHHHHHHHHHHHHHHCCCCCCCC |
| 705 | EQQERKNREKYKNESEDKRYQKEGKGGKGNH     | -48.80 | 38.7 | HHHHHHHHHHHHHHHHHHHHHHHHHHHHHHHCCCCCCCC |
| 424 | QDEERKQRDQKNDKEHKRYQREGQGGQGGHQS    | -48.77 | 22.6 | CHHHHHHHHHHHHHHHHHHHHHHHHHHHHHHCCCCCCCC |
| 945 | DEERKRQEDQRRNDKEHEEYQRYGGQGGHQS     | -48.77 | 29.0 | HHHHHHHHHHHHHHHHHHHHHHHHHHHHHHHCCCCCCCC |
| 766 | EEEEERKQDQRRRNEHEEYQRYQREGRGGQGGHQP | -48.75 | 32.3 | HHHHHHHHHHHHHHHHHHHHHHHHHHHHHHHCCCCCCCC |
| 354 | EEQQRKQEQRRNDKEDEEYQRYGWGKGHYP      | -48.74 | 35.5 | HHHHHHHHHHHHHHHHHHHHHHHHHHHHHHHCCCCCCCC |
| 829 | EEEEKKKRQDESNEKEDEEYQRRGQGGKGGHQP   | -48.72 | 41.9 | CHHHHHHHHHHHHHHHHHHHHHHHHHHHHHHCCCCCCCC |
| 826 | EQEERIKQDQKNEKEQEYQRRGRGQGGHQP      | -48.72 | 29.0 | CHHHHHHHHHHHHHHHHHHHHHHHHHHHHHHCCCCCCCC |
| 595 | EEEQRKKEDQRKNDDEDEEYQRKGRGKGNP      | -48.71 | 35.5 | HHHHHHHHHHHHHHHHHHHHHHHHHHHHHHHCCCCCCCC |
| 753 | EEEQRKKEDQRKNDDEDEEYQREGRGGKGGHQP   | -48.71 | 35.5 | HHHHHHHHHHHHHHHHHHHHHHHHHHHHHHHCCCCCCCC |
| 110 | QDEQRKQEDQRKNDKEHEEYQRRGRGQGGHQP    | -48.71 | 22.6 | CHHHHHHHHHHHHHHHHHHHHHHHHHHHHHHCCCCCCCC |
| 954 | EEEEKSRDQYKNDYEHEEYQRKGRGKGGHQP     | -48.70 | 35.5 | CHHHHHHHHHHHHHHHHHHHHHHHHHHHHHHCCCCCCCC |
| 191 | EEERRKQEDKYRNEWHEHEEYQRKGRGQGGHQP   | -48.67 | 35.5 | HHHHHHHHHHHHHHHHHHHHHHHHHHHHHHHCCCCCCCC |
| 046 | QEQQNKQEDQRRNDKEHRRYQREGKGGKGNH     | -48.66 | 29.0 | HHHHHHHHHHHHHHHHHHHHHHHHHHHHHHHCCCCCCCC |
| 866 | DNERRIQEKEYRNEYEQEYQRKGRGQGGHQP     | -48.66 | 25.8 | CHHHHHHHHHHHHHHHHHHHHHHHHHHHHHHCCCCCCCC |
| 642 | EEEEERKKQDKWNEWEDDEEYQRKQGKGGHNP    | -48.65 | 41.9 | HHHHHHHHHHHHHHHHHHHHHHHHHHHHHHHCCCCCCCC |
| 556 | EEEKKKQEDQRKNEEHEKYFKQEGQGGQKGN     | -48.65 | 32.3 | HHHHHHHHHHHHHHHHHHHHHHHHHHHHHHHCCCCCCCC |
| 706 | QREKQIQEKRSENEEQKRYQRYGWGQGGHYP     | -48.65 | 25.8 | HHHHHHHHHHHHHHHHHHHHHHHHHHHHHHHCCCCCCCC |
| 999 | EEERRKQEDKERNEHEHKRYQREGRGGKGGHQP   | -48.65 | 35.5 | HHHHHHHHHHHHHHHHHHHHHHHHHHHHHHHCCCCCCCC |
| 598 | DNQRRKNHEQESNDKEDKRYQREGRGGKGGHQP   | -48.63 | 29.0 | CHHHHHHHHHHHCHHHHHHHHHHHHCCCCCCCC       |
| 679 | EEEEERKRQDKEKNEKEDKRYQREGRGGKGGHQP  | -48.63 | 41.9 | HHHHHHHHHHHHHHHHHHHHHHHHHHHHHHHCCCCCCCC |
| 243 | EEEEERKKEDQRKNDDEDRYQRYGRGKGGHQP    | -48.61 | 35.5 | HHHHHHHHHHHHHHHHHHHHHHHHHHHHHHHCCCCCCCC |
| 763 | EEEEERKQRDKEKNEKEHKRYQREGRGGKGGHQP  | -48.57 | 35.5 | HHHHHHHHHHHHHHHHHHHHHHHHHHHHHHHCCCCCCCC |
| 808 | QDQERKKQDQYNNREDEEYQREGRGGKGGHQP    | -48.56 | 35.5 | CHHHHHHHHHHHHHHHHHHHHHHHHHHHHHHCCCCCCCC |
| 501 | EEEEKKQRDQYKNDWEHEEYQRYGRGQGGHQP    | -48.56 | 32.3 | HHHHHHHHHHHHCHHHHHHHHHHHHCCCCCCCC       |
| 187 | EEEEERKQRDQYKNDWEHEEYQRKGRGQGGHQP   | -48.56 | 29.0 | HHHHHHHHHHHHHHHHHHHHHHHHHHHHHHHCCCCCCCC |
| 233 | EEEEERKQRDQYKNDWEHEEYQRQGRGQGGHQP   | -48.56 | 29.0 | HHHHHHHHHHHHHHHHHHHHHHHHHHHHHHHCCCCCCCC |
| 986 | EEERRKQEDQYRNDYEHEEYQRKGRGQGGHQP    | -48.56 | 29.0 | HHHHHHHHHHHHHHHHHHHHHHHHHHHHHHHCCCCCCCC |
| 795 | EQEQRIINEDFRKNREEQERYQREGQGGQGGHQS  | -48.55 | 25.8 | HHHHHHHHHHHHHHHHHHHHHHHHHHHHHHHCCCCCCCC |
| 930 | EEERKKQEDQRSNDEDEEYQRQGRGKGGHQP     | -48.54 | 38.7 | HHHHHHHHHHHHHHHHHHHHHHHHHHHHHHHCCCCCCCC |
| 290 | EEEEERKKEDQRKNEEEDDEEYQKYGGKGGHQP   | -48.53 | 38.7 | HHHHHHHHHHHHHHHHHHHHHHHHHHHHHHHCCCCCCCC |
| 435 | EEEEERKQRDKQKNREQEYQRYGRGQGGHQP     | -48.53 | 35.5 | HHHHHHHHHHHHHHHHHHHHHHHHHHHHHHHCCCCCCCC |
| 261 | QEEEEKQRDKQKNEREQKRYQRYGRGQGGHQP    | -48.53 | 35.5 | CHHHHHHHHHHHHHHHHHHHHHHHHHHHHHHCCCCCCCC |
| 875 | EQEERKKEDQYRNESEHQKQKQKGGKGNH       | -48.51 | 25.8 | HHHHHHHHHHHHHHHHHHHHHHHHHHHHHHHCCCCCCCC |
| 154 | EEEQKKQDQYKNDYEHEEYQRKGRGQGGHQP     | -48.49 | 32.3 | HHHHHHHHHHHHHHHHHHHHHHHHHHHHHHHCCCCCCCC |
| 248 | EQEERIKKDQEKNEKEQEYQRRGRGQGGHQP     | -48.49 | 29.0 | CHHHHHHHHHHHHHHHHHHHHHHHHHHHHHHCCCCCCCC |
| 070 | EQEERIKDQKSNNEEQRYQRYGGQGGHQS       | -48.49 | 29.0 | CHHHHHHHHHHHCHHHHHHHHHHHHCCCCCCCC       |
| 613 | EQEERIKDQQNNEAEQKRYQREGKGGKGNH      | -48.49 | 35.5 | CHHHHHHHHHHHHHHHHHHHHHHHHHHHHHHCCCCCCCC |
| 310 | EEQQRKQEDQRRNDKEEYQRYGKGGKGNH       | -48.49 | 32.3 | HHHHHHHHHHHHHHHHHHHHHHHHHHHHHHHCCCCCCCC |
| 701 | EEEEERKRQDKEKNEKEHKRYQRYGKGGKGNH    | -48.48 | 32.3 | HHHHHHHHHHHHHHHHHHHHHHHHHHHHHHHCCCCCCCC |
| 387 | EEQQRKQEDKWRNEWQKYYQKKGQGGHQP       | -48.47 | 38.7 | HHHHHHHHHHHHHHHHHHHHHHHHHHHHHHHCCCCCCCC |
| 161 | EEEQRKQDQYNNREDEEYQRYQREGRGGQGGHQP  | -48.47 | 38.7 | HHHHHHHHHHHHHHHHHHHHHHHHHHHHHHHCCCCCCCC |
| 575 | EEEEERKQRDQEKNDKEDERYQREGKGGKGGHSH  | -48.47 | 35.5 | HHHHHHHHHHHHHHHHHHHHHHHHHHHHHHHCCCCCCCC |
| 062 | EEEEKKQDQQRKNEKEHEEYQRRGKGGKGNH     | -48.46 | 35.5 | CHHHHHHHHHHHHHHHHHHHHHHHHHHHHHHCCCCCCCC |
| 022 | EQEERKQDQRRHNEHEKSYQRYGRGQGGHQP     | -48.45 | 32.3 | HHHHHHHHHHHHHHHHHHHHHHHHHHHHHHHCCCCCCCC |
| 032 | EQEQRKQEEQRENEREDKEYQREGRGGKGGHQP   | -48.45 | 32.3 | HHHHHHHHHHHHHHHHHHHHHHHHHHHHHHHCCCCCCCC |
| 230 | EEQEKKNDQKNDKEQEYQRRGWGQGGHYP       | -48.44 | 35.5 | HHHHHHHHHHHHHHHHHHHHHHHHHHHHHHHCCCCCCCC |





|     |                                   |        |      |                                  |
|-----|-----------------------------------|--------|------|----------------------------------|
| 275 | EEQQRKQEQQRNDKEDDRYQREGRGKQHQP    | -47.98 | 35.5 | HHHHHHHHHHHHHHHHHHHHHHHHHHHHHHCC |
| 810 | QKEQEIQEQRRNEKEKRYQREGKQGHNH      | -47.97 | 25.8 | CHHHHHHHHHHHHHHHHHHHHHHHHHHHHH   |
| 609 | EEERRKQEDKERNEKEDKRYQREGKKGHNH    | -47.97 | 41.9 | HHHHHHHHHHHHHHHHHHHHHHHHHHHHHH   |
| 530 | EEEEERKQDQKNDKEDREYQRRGQKGGHQP    | -47.95 | 35.5 | HHHHHHHHHHHHHHHHHHHHHHHHHHHHHH   |
| 887 | EQEERKKQDQEKNDKEDRYQREGRGKGNH     | -47.95 | 32.3 | HHHHHHHHHHHHHHHHHHHHHHHHHHHHHH   |
| 617 | EEERKKQEDQERNKEDHRRYQREGRGKQHQP   | -47.95 | 32.3 | HHHHHHHHHHHHHHHHHHHHHHHHHHHHHH   |
| 409 | EEEEKKKQDQKNEKEDEEYQRRGQKGGHQS    | -47.94 | 41.9 | CHHHHHHHHHHHHHHHHHHHHHHHHHHHHH   |
| 349 | EEEEERKQDQKNEKEDEEYQRYGRGKQHQP    | -47.94 | 38.7 | HHHHHHHHHHHHHHHHHHHHHHHHHHHHHH   |
| 045 | EEEEERKQDQYKNEYEDQYQYRQKGRGKQHQP  | -47.94 | 38.7 | HHHHHHHHHHHHHHHHHHHHHHHHHHHHHH   |
| 710 | EEEQRKKEDQRKNEEDKRYQREGRGKQHQP    | -47.94 | 38.7 | HHHHHHHHHHHHHHHHHHHHHHHHHHHHHH   |
| 375 | EEEQRKKEDQRKNEEDQRYQKEGRGKQHQP    | -47.94 | 38.7 | HHHHHHHHHHHHHHHHHHHHHHHHHHHHHH   |
| 548 | EEEQRKKEDQRKNEEDQRYQREGRGKQHQP    | -47.94 | 38.7 | HHHHHHHHHHHHHHHHHHHHHHHHHHHHHH   |
| 616 | EQEERKKQDQEKNEREDEYQRRGKGGHQP     | -47.94 | 35.5 | HHHHHHHHHHHHHHHHHHHHHHHHHHHHHH   |
| 259 | EQEERKKQDQKNEKEDEEYQKGRGKGGHQP    | -47.94 | 35.5 | HHHHHHHHHHHHHHHHHHHHHHHHHHHHHH   |
| 725 | QEERKKQDQEKNEKEDKRYQREGRGKGGHQP   | -47.94 | 38.7 | CHHHHHHHHHHHHHHHHHHHHHHHHHHHHH   |
| 792 | QEERKKQDQKNEKEDEEYQRRGKGGHNH      | -47.94 | 38.7 | CHHHHHHHHHHHHHHHHHHHHHHHHHHHHH   |
| 362 | QEERKKQDQYRNEWEDEEYQRRGKGGHQP     | -47.94 | 38.7 | CHHHHHHHHHHHHHHHHHHHHHHHHHHHHH   |
| 823 | QEEERKQDQYKNEWEDEEYQYRGRGKGGHQP   | -47.94 | 32.3 | CHHHHHHHHHHHHHHHHHHHHHHHHHHHHH   |
| 566 | EEERKKQEDQERNKEDKRYQREGKQGHNH     | -47.94 | 29.0 | HHHHHHHHHHHHHHHHHHHHHHHHHHHHHH   |
| 461 | EEEEERKQDQEKNDKEDRRYQRYGKGGHQS    | -47.93 | 35.5 | HHHHHHHHHHHCHHHHHHHHHHHHHHHHHHH  |
| 612 | EEQERKHQDQKNRKEDEEYQKQGRGKGGHQP   | -47.92 | 38.7 | HHHHHHHHHHHHHHHHHHHHHHHHHHHHHH   |
| 560 | EQEQRRKQEDKRRHEKEKRYQREGRGQGGHQP  | -47.92 | 35.5 | HHHHHHHHHHHHHHHHHHHHHHHHHHHHHH   |
| 714 | EEQQKKNEEQQSNDREDRYQREGRGKGGHQP   | -47.92 | 38.7 | HHHHHHHHHHHHHHHHHHHHHHHHHHHHHH   |
| 417 | EEERRKQEDQERHEKEDKRYQRYGRGKGGHQP  | -47.92 | 41.9 | HHHHHHHHHHHHHHHHHHHHHHHHHHHHHH   |
| 539 | EEERRKQEDQYRHEWEDEEYQYRKGKGGHQP   | -47.92 | 41.9 | HHHHHHHHHHHHHHHHHHHHHHHHHHHHHH   |
| 749 | EEEEKKRQDQEKNEKEDEEYQRRGKGGHGNH   | -47.91 | 41.9 | CHHHHHHHHHHHHHHHHHHHHHHHHHHHHH   |
| 144 | EEEEKKRQDQEKNEKEDKRYQREGRGKGGHQP  | -47.91 | 41.9 | CHHHHHHHHHHHHHHHHHHHHHHHHHHHHH   |
| 356 | EEEEERKQDQEKNEKEDERYQREGWGKGGHY   | -47.91 | 38.7 | HHHHHHHHHHHHHHHHHHHHHHHHHHHHHH   |
| 793 | EEEEERKQDQEKNEKEDKRYQRYGRGKGGHQP  | -47.91 | 38.7 | HHHHHHHHHHHHHHHHHHHHHHHHHHHHHH   |
| 403 | EEEEERKQDQEKNEKEDKRYQRYGWGKGGHY   | -47.91 | 38.7 | HHHHHHHHHHHHHHHHHHHHHHHHHHHHHH   |
| 296 | EEEEERKQDQEKNEKEDQRYQREGRGKGGHQP  | -47.91 | 38.7 | HHHHHHHHHHHHHHHHHHHHHHHHHHHHHH   |
| 802 | EQEERKRQDQEKNEKEDEEYQYRKGKGGHQP   | -47.91 | 35.5 | HHHHHHHHHHHHHHHHHHHHHHHHHHHHHH   |
| 874 | QEERKKRQDQEKNEKEDEEYQRRGKGGHQP    | -47.91 | 38.7 | CHHHHHHHHHHHHHHHHHHHHHHHHHHHHH   |
| 666 | QEERKKRQDQEKNEKEDKRYQREGKGGKGNP   | -47.91 | 38.7 | CHHHHHHHHHHHHHHHHHHHHHHHHHHHHH   |
| 622 | EEQQRKQDQRSNEKEDEEYQRRGKGGHQP     | -47.91 | 38.7 | HHHHHHHHHHHHHHHHHHHHHHHHHHHHHH   |
| 756 | EEEQRKKQDQINNEKEDEEYQRRGKGGHQP    | -47.87 | 41.9 | HHHHHHHHHHHHHHHHHHHHHHHHHHHHHH   |
| 518 | EERQRYQEDQRKNDQEHKRYQRYGRGQGGHQP  | -47.87 | 25.8 | HHHHHHHHHHHHHHHHHHHHHHHHHHHHHH   |
| 450 | EEERKQEQQRENDREHREYQREGKGGHGNP    | -47.86 | 25.8 | HHHHHHHHHHHHHHHHHHHHHHHHHHHHHH   |
| 494 | EEEEERKQDQKHDYEQKEYQKEGRGQGGHQP   | -47.85 | 32.3 | HHHHHHHHHHHHHHHHHHHHHHHHHHHHHH   |
| 882 | EEQQRKQDQYKSNEDKEYQYRKGKGGNQN     | -47.85 | 41.9 | HHHHHHHHHHHHHHHHHHHHHHHHHHHHHH   |
| 378 | EEEQRKQYDQKNEEDKRYQREGRGKGGHQP    | -47.84 | 38.7 | HHHHHHHHHHHHHHHHHHHHHHHHHHHHHH   |
| 966 | EEERKQLDQENHEKEDEEYQRRGKGGHQP     | -47.84 | 48.4 | HHHHHHHHHHHHHHHHHHHHHHHHHHHHHH   |
| 733 | EEQQRKQEDKRNKEKEKRYQREGRGQGGHQP   | -47.84 | 38.7 | HHHHHHHHHHHHHHHHHHHHHHHHHHHHHH   |
| 453 | EEEEERKSRDQKNEKEDEEYQREGSGKGGHQP  | -47.83 | 41.9 | CHHHHHHHHHHHHHHHHHHHHHHHHHHHHH   |
| 528 | EEEEERKQDQKNEKEEHKRYQRYGKGGHQS    | -47.82 | 35.5 | HHHHHHHHHHHHHHHHHHHHHHHHHHHHHH   |
| 229 | EEQERKRQDQESNDREDDYQYKKGKGGHQP    | -47.82 | 38.7 | HHHHHHHHHHHHHHHHHHHHHHHHHHHHHH   |
| 605 | EEEQRKQEQQRKRNKEDERYQREGQGGKGGHQS | -47.81 | 32.3 | HHHHHHHHHHHHHHHHHHHHHHHHHHHHHH   |
| 140 | EEERKKQEDQRKNDDEHRRYQRYGRGQGGHQP  | -47.80 | 32.3 | HHHHHHHHHHHHHHHHHHHHHHHHHHHHHH   |
| 480 | EEERKKQDQYSNEYEDDEEYQYRKGKGGHQP   | -47.77 | 41.9 | HHHHHHHHHHHHHHHHHHHHHHHHHHHHHH   |
| 273 | EEERKQEDQERNEKEDERYQQQGRGKGGHQP   | -47.77 | 38.7 | HHHHHHHHHHHHHHHHHHHHHHHHHHHHHH   |
| 256 | EEERKQEDQERNEKEDKYQKKGKGGHQP      | -47.77 | 38.7 | HHHHHHHHHHHHHHHHHHHHHHHHHHHHHH   |
| 653 | EEERKQEDQERNEKEDQRYQYQGGKGGHQS    | -47.77 | 38.7 | HHHHHHHHHHHHHHHHHHHHHHHHHHHHHH   |
| 781 | EEERKQEDQERNEEDQRYQRYGRGKGGHQP    | -47.77 | 38.7 | HHHHHHHHHHHHHHHHHHHHHHHHHHHHHH   |
| 741 | EEERKQLDQESNEREDEEYQRRGKGGKGNH    | -47.77 | 41.9 | HHHHHHHHHHHHHHHHHHHHHHHHHHHHHH   |
| 634 | EEEEERKQRDQYKNDYEQYQKQGGGQGGHQS   | -47.75 | 29.0 | HHHHHHHHHHHHHHHHHHHHHHHHHHHHHH   |
| 231 | QEEENKQRDQWKNDEWQQYQKQGGGQGGHQP   | -47.75 | 25.8 | CHHHHHHHHHHHHHHHHHHHHHHHHHHHHH   |
| 395 | EQEERKQREQKSNREDERYQRYGKGGHQS     | -47.75 | 29.0 | HHHHHHHHHHHHHHHHHHHHHHHHHHHHHH   |
| 812 | EEERKKQDQERNEKEDEEYQYRKGKGGHFS    | -47.75 | 38.7 | HHHHHHHHHHHHHHHHHHHHHHHHHHHHHH   |
| 068 | QEERKKQEDQERNEKEDEEYQYRGRGGHQP    | -47.75 | 32.3 | HHHHHHHHHHHHHHHHHHHHHHHHHHHHHH   |
| 137 | EEEEERKQDQEKRNKEDERYQREGKGGKGNH   | -47.73 | 35.5 | HHHHHHHHHHHHHHHHHHHHHHHHHHHHHH   |
| 782 | EEEQKIQEQRRNQEHEERYQRQGRGQGGHQP   | -47.71 | 29.0 | HHHHHHHHHHHHHHHHHHHHHHHHHHHHHH   |
| 567 | EEEQRKKEDQRKNEKEDQYQKQGGKGGHQS    | -47.71 | 38.7 | HHHHHHHHHHHHHHHHHHHHHHHHHHHHHH   |
| 099 | DEERKQHDQESNDKEDRRYQREGRGKGGHQP   | -47.70 | 35.5 | HHHHHHHHHHHHCHHHHHHHHHHHHHHHHHHH |
| 573 | DEERKQEDQERNEKEDERYQREGQGGKGNH    | -47.69 | 38.7 | CHHHHHHHHHHHHHHHHHHHHHHHHHHHHH   |
| 155 | DEERKQHDQESNEKEDKRYQRYGKGGKGNH    | -47.69 | 38.7 | HHHHHHHHCHHHHHHHHHHHHHHHHHHHHH   |
| 041 | EEEEERKQRDQESNEKEDERYQQQGRGKGGHQP | -47.69 | 38.7 | HHHHHHHHHHHHHHHHHHHHHHHHHHHHHH   |
| 895 | EQEQRKQEEQYRNDSEDRYQQQGRGKGGHQP   | -47.68 | 29.0 | HHHHHHHHHHHHHHHHHHHHHHHHHHHHHH   |

|     |                                  |        |      |                                          |
|-----|----------------------------------|--------|------|------------------------------------------|
| 502 | EQEKRKQEDDKRKNEEEQKRYQRRGQGHQP   | -47.67 | 32.3 | HHHHHHHHHHHHHHHHHHHHHHHHHHHHHHHHHCCCCCCC |
| 852 | EEEEERKQRDQEKNRKEDDEYYQKYQGKGHP  | -47.67 | 35.5 | HHHHHHHHHHHHHHHHHHHHHHHHHHHHHHHHHCCCCCCC |
| 035 | QEERKKQHDQESNRKEDERYQREGRGKGHP   | -47.67 | 35.5 | HHHHHHHHHHHHHHHHHHHHHHHHHHHHHHHHHCCCCCCC |
| 376 | EEEQKQDQKYSNEYEQEYYQRRGQGHQP     | -47.67 | 38.7 | HHHHHHHHHHHHHHHHHHHHHHHHHHHHHHHHHCCCCCCC |
| 021 | EEEEKKKRDQKNDREDEYYQRRGQGHQP     | -47.66 | 32.3 | CHHHHHHHHHHHHHHHHHHHHHHHHHHHHHHHHCCCCCCC |
| 463 | EEQKKQEDQRRNEKEQRYQREGRGQGHQP    | -47.65 | 38.7 | HHHHHHHHHHHHHHHHHHHHHHHHHHHHHHHHHCCCCCCC |
| 655 | EEKKKQEQQRSNEKEDEEYQRRGQGHQS     | -47.65 | 38.7 | HHHHHHHHHHHHHHHHHHHHHHHHHHHHHHHHHCCCCCCC |
| 162 | QREEQIQREYQKNEYEQEYYQRRGQGHQP    | -47.65 | 22.6 | CHHHHHHHHHHHHHHHHHHHHHHHHHHHHHHHHCCCCCCC |
| 889 | QREKQIQEERSNEEEQRYQRRGQGHNN      | -47.65 | 22.6 | HHHHHHHHHHHHHHHHHHHHHHHHHHHHHHHHHCCCCCCC |
| 263 | EQEQRKQEDQRRNEKEQRYQREGKGQGHNN   | -47.65 | 29.0 | HHHHHHHHHHHHHHHHHHHHHHHHHHHHHHHHHCCCCCCC |
| 089 | EEEEERKREDQWRHEYEDEEYQRRGQGHQP   | -47.63 | 41.9 | CHHHHHHHHHHHHHHHHHHHHHHHHHHHHHHHHCCCCCCC |
| 979 | EEEEERKREDQRRNDEDRYQRRGQGHQP     | -47.63 | 35.5 | HHHHHHHHHHHHHHHHHHHHHHHHHHHHHHHHHCCCCCCC |
| 777 | EEEEERKSRDQKNEREDEEYQRRGQGHQP    | -47.59 | 38.7 | CHHHHHHHHHHHHHHHHHHHHHHHHHHHHHHHHCCCCCCC |
| 007 | EQEERLNRRQESNDKEDQRYQREGRGKGHP   | -47.59 | 29.0 | HHHHHHHHHHHHHHHHHHHHHHHHHHHHHHHHHCCCCCCC |
| 620 | EEEEERKQRDQKNEKEQRYQREGRGQGHQP   | -47.59 | 32.3 | HHHHHHHHHHHHHHHHHHHHHHHHHHHHHHHHHCCCCCCC |
| 160 | EEQERKQDQDSNEREQRYQRRGQGHQP      | -47.58 | 35.5 | HHHHHHHHHHHHHHHHHHHHHHHHHHHHHHHHHCCCCCCC |
| 604 | QDEQRKNEDEQKNDKEDRRYQREGRGKGHP   | -47.56 | 29.0 | CHHHHHHHHHHHHHHHHHHHHHHHHHHHHHHHHCCCCCCC |
| 716 | EEQQRKQEDQYRNRYEQEYYQRRGQGHQP    | -47.56 | 32.3 | HHHHHHHHHHHHHHHHHHHHHHHHHHHHHHHHHCCCCCCC |
| 755 | EEERKQEDQWRNDEDRYQRRGQGHQP       | -47.54 | 35.5 | HHHHHHHHHHHHHHHHHHHHHHHHHHHHHHHHHCCCCCCC |
| 721 | EQQRKQEEQYRNDWEHQRYQREGRGQGHQP   | -47.53 | 25.8 | HHHHHHHHHHHHHHHHHHHHHHHHHHHHHHHHHCCCCCCC |
| 674 | EQEERKQREQRNNDYEHEEYQRRGQGHQP    | -47.53 | 25.8 | HHHHHHHHHHHHHHHHHHHHHHHHHHHHHHHHHCCCCCCC |
| 504 | EEEEERKQKYSNEYEDEEYQRRGQGHQP     | -47.53 | 38.7 | HHHHHHHHHHHHHHHHHHHHHHHHHHHHHHHHHCCCCCCC |
| 202 | EEQQRKQEDQYRNEWEQRYQREGKGQGHNN   | -47.52 | 35.5 | HHHHHHHHHHHHHHHHHHHHHHHHHHHHHHHHHCCCCCCC |
| 327 | EEEQKQRDQYKNEWEQEYYQRRGQGHQP     | -47.52 | 35.5 | HHHHHHHHHHHHHHHHHHHHHHHHHHHHHHHHHCCCCCCC |
| 432 | EEEEERKQDQRRNEKEQRYQRRGQGHQP     | -47.52 | 32.3 | HHHHHHHHHHHHHHHHHHHHHHHHHHHHHHHHHCCCCCCC |
| 514 | QEEEEKQDQRRNEKEQRYQRRGQGHQP      | -47.52 | 32.3 | CHHHHHHHHHHHHHHHHHHHHHHHHHHHHHHHHCCCCCCC |
| 429 | EEQQRKQEDQKNEEDEERYQRRGQGHSS     | -47.50 | 41.9 | HHHHHHHHHHHHHHHHHHHHHHHHHHHHHHHHHCCCCCCC |
| 772 | EEEEERKREDQWRNDEDRYQRRGQGHQP     | -47.49 | 35.5 | HHHHHHHHHHHHHHHHHHHHHHHHHHHHHHHHHCCCCCCC |
| 855 | EEEQKQEDDRNRKEDQRYQREGRGKGHP     | -47.49 | 38.7 | HHHHHHHHHHHHHHHHHHHHHHHHHHHHHHHHHCCCCCCC |
| 555 | EEEQRKQEDQKNEREDEEYQRRGQGHQP     | -47.49 | 38.7 | HHHHHHHHHHHHHHHHHHHHHHHHHHHHHHHHHCCCCCCC |
| 128 | EEEEKKRDQYDNEWEDEEYQRRGQGHQP     | -47.48 | 41.9 | CHHHHHHHHHHHHHHHHHHHHHHHHHHHHHHHHCCCCCCC |
| 906 | EEEEKRRDQESNEEEDKRYQRRGQGHQP     | -47.48 | 41.9 | CHHHHHHHHHHHHHHHHHHHHHHHHHHHHHHHHCCCCCCC |
| 197 | EEEEERKRDQENNEREDKRYQREGKGQGHNN  | -47.48 | 41.9 | HHHHHHHHHHHHHHHHHHHHHHHHHHHHHHHHHCCCCCCC |
| 342 | EEEEERKRDQESNEREDQRYQREGRGKGHP   | -47.48 | 38.7 | HHHHHHHHHHHHHHHHHHHHHHHHHHHHHHHHHCCCCCCC |
| 942 | EEEEERKRDQESNEYEDEEYQRRGQGHQN    | -47.48 | 38.7 | HHHHHHHHHHHHHHHHHHHHHHHHHHHHHHHHHCCCCCCC |
| 141 | EEEEEKQDQKNDKEDDEEYQRRGQGHQP     | -47.47 | 45.2 | CHHHHHHHHHHHHHHHHHHHHHHHHHHHHHHHHCCCCCCC |
| 511 | EEEEERKQEDQKNDDEQRYQRRGQGHQP     | -47.46 | 29.0 | HHHHHHHHHHHHHHHHHHHHHHHHHHHHHHHHHCCCCCCC |
| 484 | EEEEERKREDQRRNREDEERYQRRGQGHQP   | -47.46 | 35.5 | HHHHHHHHHHHHHHHHHHHHHHHHHHHHHHHHHCCCCCCC |
| 638 | EEEEERKQEQQRSNEEEDKRYQREGRGQGHQP | -47.46 | 35.5 | HHHHHHHHHHHHHHHHHHHHHHHHHHHHHHHHHCCCCCCC |
| 949 | EEEEERKQEQQRSNEEEDKRYQRRGQGHQP   | -47.46 | 35.5 | HHHHHHHHHHHHHHHHHHHHHHHHHHHHHHHHHCCCCCCC |
| 066 | EQEQRKQDQDQRRNREDEERYQRRGQGHQP   | -47.45 | 35.5 | HHHHHHHHHHHHHHHHHHHHHHHHHHHHHHHHHCCCCCCC |
| 780 | EEEQRKQDQYNNDEDRYQRRGQGHQP       | -47.44 | 38.7 | HHHHHHHHHHHHHHHHHHHHHHHHHHHHHHHHHCCCCCCC |
| 216 | EEEEERKQEDQKNDREDEEYQRRGQGHQS    | -47.43 | 29.0 | HHHHHHHHHHHHHHHHHHHHHHHHHHHHHHHHHCCCCCCC |
| 167 | EEEQRKQEDDQKNDREDEEYQRRGQGHQP    | -47.43 | 35.5 | HHHHHHHHHHHHHHHHHHHHHHHHHHHHHHHHHCCCCCCC |
| 355 | EEQRRKQEDQKNDREDEEYQRRGQGHQP     | -47.42 | 38.7 | HHHHHHHHHHHHHHHHHHHHHHHHHHHHHHHHHCCCCCCC |
| 475 | EEEEERKQEQYKNDWEDEEYQRRGQGHQP    | -47.41 | 32.3 | HHHHHHHHHHHHHHHHHHHHHHHHHHHHHHHHHCCCCCCC |
| 079 | EEEEEKKRDQKNDREDEEYQRRGQGHQP     | -47.41 | 38.7 | CHHHHHHHHHHHHHHHHHHHHHHHHHHHHHHHHCCCCCCC |
| 264 | QQQQNHQEERKNEKEDEEYQRRGQGHQP     | -47.40 | 35.5 | CHHHHHHHHHHHHHHHHHHHHHHHHHHHHHHHHCCCCCCC |
| 464 | EEEEERKQDQKNEKEQRYQREGRGQGHQP    | -47.40 | 35.5 | HHHHHHHHHHHHHHHHHHHHHHHHHHHHHHHHHCCCCCCC |
| 876 | EEEEERKQEQQRSNEEEDKRYQRRGQGHQS   | -47.40 | 25.8 | HHHHHHHHHHHHHHHHHHHHHHHHHHHHHHHHHCCCCCCC |
| 175 | EQEKRKQEQQRSNEEEDKRYQREGRGQGHQP  | -47.40 | 22.6 | HHHHHHHHHHHHHHHHHHHHHHHHHHHHHHHHHCCCCCCC |
| 405 | EEEEKRRDQKNEEEDKRYQREGRGQGHQP    | -47.40 | 45.2 | HHHHHHHHHHHHHHHHHHHHHHHHHHHHHHHHHCCCCCCC |
| 908 | EEQKRKQEDQKNEEEDERYQRRGQGHQP     | -47.39 | 35.5 | HHHHHHHHHHHHHHHHHHHHHHHHHHHHHHHHHCCCCCCC |
| 006 | EEQKRKQEDQKNEEEDERYQRRGQGHNN     | -47.39 | 35.5 | HHHHHHHHHHHHHHHHHHHHHHHHHHHHHHHHHCCCCCCC |
| 563 | EEEEKKEEDKRNKEDDEEYQRRGQGHNSN    | -47.39 | 45.2 | HHHHHHHHHHHHHHHHHHHHHHHHHHHHHHHHHCCCCCCC |
| 588 | EEEEERKQEDQKNEEEDERYQRRGQGHQP    | -47.39 | 32.3 | HHHHHHHHHHHHHHHHHHHHHHHHHHHHHHHHHCCCCCCC |
| 606 | EEEEERKQEDQRSNEKEQRYQRRGQGHQS    | -47.39 | 32.3 | HHHHHHHHHHHHHHHHHHHHHHHHHHHHHHHHHCCCCCCC |
| 526 | EEEEERKQEDQKNEEEDERYQRRGQGHNN    | -47.39 | 32.3 | HHHHHHHHHHHHHHHHHHHHHHHHHHHHHHHHHCCCCCCC |
| 545 | EEEEERKQEDDRKNEEEDERYQRRGQGHNN   | -47.36 | 35.5 | HHHHHHHHHHHHHHHHHHHHHHHHHHHHHHHHHCCCCCCC |
| 959 | EQEQRKNEDEQRRNNEEEDERYQRRGQGHNN  | -47.34 | 32.3 | HHHHHHHHHHHHHHHHHHHHHHHHHHHHHHHHHCCCCCCC |
| 380 | EQEERKQEQQRKNDKEHEEYQRRGQGHQP    | -47.34 | 22.6 | HHHHHHHHHHHHHHHHHHHHHHHHHHHHHHHHHCCCCCCC |
| 423 | EQQERKQDQKNDREDEEYQRRGQGHQP      | -47.33 | 29.0 | HHHHHHHHHHHHHHHHHHHHHHHHHHHHHHHHHCCCCCCC |
| 112 | EEEEERKQDQKNEKEQRYQRRGQGHQP      | -47.33 | 35.5 | HHHHHHHHHHHHHHHHHHHHHHHHHHHHHHHHHCCCCCCC |
| 856 | EEEQKQEDQKNEKEQRYQRRGQGHQP       | -47.33 | 35.5 | HHHHHHHHHHHHHHHHHHHHHHHHHHHHHHHHHCCCCCCC |
| 076 | EEEEERKQEDQKNEKEQRYQRRGQGHQP     | -47.33 | 32.3 | HHHHHHHHHHHHHHHHHHHHHHHHHHHHHHHHHCCCCCCC |
| 118 | EQEERKQDQKNEEEDERYQRRGQGHNN      | -47.33 | 29.0 | HHHHHHHHHHHHHHHHHHHHHHHHHHHHHHHHHCCCCCCC |
| 712 | QEEEEKQDQKNEKEQRYQRRGQGHQP       | -47.33 | 32.3 | CHHHHHHHHHHHHHHHHHHHHHHHHHHHHHHHHCCCCCCC |

|     |                                  |        |      |                                    |
|-----|----------------------------------|--------|------|------------------------------------|
| 551 | EEEQKQRQQRSHKEDEFEYQRRGWGKGHYP   | -47.28 | 41.9 | HHHHHHHHHHHHHHHHHHHHHHHHHHHCCCCCCC |
| 925 | EEEQRKQEDDQKNRREHEEKQRRGQCGKQN   | -47.28 | 25.8 | HHHHHHHHHHHHHHHHHHHHHHHHHHHCCCCCCC |
| 719 | EQEERKQEDQRRNDKEQKYQQQQGQGHNH    | -47.27 | 25.8 | HHHHHHHHHHHHHHHHHHHHHHHHHHHCCCCCCC |
| 102 | EQEQRHQEERKNEKEDEFEYQRRGKGKGNH   | -47.27 | 35.5 | HHHHHHHHHHHHHHHHHHHHHHHHHHHCCCCCCC |
| 492 | EQEERKQRDQWKNDEWEQRYQKKGQGQGHNH  | -47.27 | 25.8 | HHHHHHHHHHHHHHHHHHHHHHHHHHHCCCCCCC |
| 579 | EQEERKQDQKNEEEHKRYQRYGRGQGHQP    | -47.26 | 29.0 | HHHHHHHHHHHHHHHHHHHHHHHHHHHCCCCCCC |
| 486 | NDQQRKQEDQRRNEKEQEFEYQRRGRGQGHQP | -47.26 | 29.0 | CHHHHHHHHHHHHHHHHHHHHHHHHHHCCCCCCC |
| 973 | EEERKKQEDQERNEKEDQRYQRYGRGKGHQP  | -47.25 | 41.9 | HHHHHHHHHHHHHHHHHHHHHHHHHHHCCCCCCC |
| 210 | EQEERHQEKEKRENEREDKEYQRYGRGKGHQP | -47.24 | 35.5 | CHHHHHHHHHHHHHHHHHHHHHHHHHHCCCCCCC |
| 568 | EEEQRKNEDQRKNDEEHEHERYQRRGQGHQP  | -47.22 | 25.8 | HHHHHHHHHHHCHHHHHHHHHHHHCCCCCCC    |
| 938 | EQQRQIEQQRHEKEQEFEYQRRGRGQGHQP   | -47.22 | 32.3 | HHHHHHHHHHHHHHHHHHHHHHHHHHHCCCCCCC |
| 907 | EEERKKEDDKRRNEEQKRYQRYGRGQGHQP   | -47.22 | 35.5 | HHHHHHHHHHHHHHHHHHHHHHHHHHHCCCCCCC |
| 097 | EEERKRDRQERHDREHEYYQQQGRGQGHQP   | -47.20 | 32.3 | HHHHHHHHHHHHHHHHHHHHHHHHHHHCCCCCCC |
| 760 | EEKKKQEDQKNEEQQEYQRKGRGQGHQP     | -47.20 | 35.5 | HHHHHHHHHHHHHHHHHHHHHHHHHHHCCCCCCC |
| 094 | EQEKRKQEDQKNEEQKSYQKQGRGQGHQP    | -47.20 | 29.0 | HHHHHHHHHHHHHHHHHHHHHHHHHHHCCCCCCC |
| 557 | QEEKNKQEDQKNEEQERYQREGWGQGHYP    | -47.20 | 29.0 | CHHHHHHHHHHHHHHHHHHHHHHHHHHCCCCCCC |
| 281 | EEEQRKEEDQKNDKEHEEYQRYGRGQGHQP   | -47.19 | 29.0 | HHHHHHHHHHHHHHHHHHHHHHHHHHHCCCCCCC |
| 524 | EEEKRRQEDARKNRKEHEERYQQQGRGQGHQP | -47.18 | 29.0 | HHHHHHHHHHHHHHHHHHHHHHHHHHHCCCCCCC |
| 228 | EEEQRKQDDRKNRKEEYQRYGRGQGHQP     | -47.17 | 35.5 | HHHHHHHHHHHHHHHHHHHHHHHHHHHCCCCCCC |
| 805 | EQEERKQDRDKNRQEDQRYQREGRGKKGHQP  | -47.17 | 32.3 | HHHHHHHHHHHHHHHHHHHHHHHHHHHCCCCCCC |
| 564 | EEERRKQEDQERNDKEDEFEYQRRGRGKGNQN | -47.16 | 35.5 | HHHHHHHHHHHHHHHHHHHHHHHHHHHCCCCCCC |
| 672 | EQEKRHQEKRNSNEEEDKRYQREGQKKGHS   | -47.14 | 35.5 | HHHHHHHHHHHHHHHHHHHHHHHHHHHCCCCCCC |
| 072 | EQERRHQEKKRNEEEDKRYQKQGRGKGHQP   | -47.14 | 35.5 | HHHHHHHHHHHHHHHHHHHHHHHHHHHCCCCCCC |
| 183 | EQEKRIQEDHRKNREEQRYQRYGRGQGHQP   | -47.12 | 25.8 | HHHHHHHHHHHHHHHHHHHHHHHHHHHCCCCCCC |
| 245 | EEERKQDARKNRKEHEEYQRYGRGQGHQP    | -47.11 | 29.0 | HHHHHHHHHHHHHHHHHHHHHHHHHHHCCCCCCC |
| 813 | EEEQRKNEDDKNRQEDQRYQREGDGKKGHQP  | -47.11 | 35.5 | HHHHHHHHHHHHHHHHHHHHHHHHHHHCCCCCCC |
| 186 | EQQRHQEQYSNDYEDEEYQRKGRGKGHQP    | -47.11 | 32.3 | HHHHHHHHHHHCHHHHHHHHHHHHCCCCCCC    |
| 507 | EEERKKQDQKNNDQKRYQRYGRGQGHQP     | -47.10 | 32.3 | HHHHHHHHHHHCHHHHHHHHHHHHCCCCCCC    |
| 013 | EEQRKQDQYNNDEWEKRYQREGRGQGHQP    | -47.09 | 35.5 | HHHHHHHHHHHHHHHHHHHHHHHHHHHCCCCCCC |
| 740 | EEQQRKQEQKRNNEEHEEYQRKGRGQGHQP   | -47.06 | 35.5 | HHHHHHHHHHHHHHHHHHHHHHHHHHHCCCCCCC |
| 956 | EQEQRIQEDDRNRKEQEERYQQQKKGQGHNH  | -47.05 | 25.8 | HHHHHHHHHHHHHHHHHHHHHHHHHHHCCCCCCC |
| 415 | EEQQRKQEDQYRNWEQEERYQQQKKGQGHNH  | -47.05 | 35.5 | HHHHHHHHHHHHHHHHHHHHHHHHHHHCCCCCCC |
| 135 | EEERKRQDDYKNRYEDEEYQRKGRGKGHQP   | -47.04 | 35.5 | HHHHHHHHHHHHHHHHHHHHHHHHHHHCCCCCCC |
| 531 | EQEERKKQEYSNDSERRYQRYGRGKGHQP    | -47.04 | 29.0 | HHHHHHHHHHHCHHHHHHHHHHHHCCCCCCC    |
| 060 | EQEKRKQEDQKNEEQERYQREGKGQGHNH    | -47.01 | 25.8 | HHHHHHHHHHHHHHHHHHHHHHHHHHHCCCCCCC |
| 865 | EEKRRKQEDDKNRQEDQRYQKEGRGKGHQP   | -47.00 | 38.7 | HHHHHHHHHHHHHHHHHHHHHHHHHHHCCCCCCC |
| 009 | EEEQRKQEQQRNEKEDQSYQRHGRGKGHQP   | -47.00 | 35.5 | HHHHHHHHHHHHHHHHHHHHHHHHHHHCCCCCCC |
| 276 | SNEERLQRDQESNEKEDEEYQRRGQKGNQN   | -47.00 | 32.3 | CHHHHHHHHHHHHHHHHHHHHHHHHHHCCCCCCC |
| 083 | QEEKRRQDQWRNDEQEYQRKGRGQGHQP     | -47.00 | 29.0 | CHHHHHHHHHHHHHHHHHHHHHHHHHHCCCCCCC |
| 692 | QREEEIQQQRKNEKEQKRYQREGKGQGHNH   | -46.99 | 22.6 | CHHHHHHHHHHHHHHHHHHHHHHHHHHCCCCCCC |
| 670 | EQEERHQREYSNDWEDEEYQRKGRGKGHQP   | -46.98 | 29.0 | CHHHHHHHHHHCHHHHHHHHHHHHCCCCCCC    |
| 578 | QEEQNKQQQYSNEYDEEYQRKGRGKGHQP    | -46.97 | 32.3 | HHHHHHHHHHHHHHHHHHHHHHHHHHHCCCCCCC |
| 334 | EEERKRQKYSNEFEHKYQQQKQGQGHQP     | -46.97 | 32.3 | CHHHHHHHHHHHHHHHHHHHHHHHHHHCCCCCCC |
| 105 | EEERKRQDQEKNDREHQYYQREGQGQGHQS   | -46.97 | 29.0 | HHHHHHHHHHHHHHHHHHHHHHHHHHHCCCCCCC |
| 482 | QEEKRRQDQEKNDREHEEYQRRGQKGNH     | -46.97 | 29.0 | CHHHHHHHHHHHHHHHHHHHHHHHHHHCCCCCCC |
| 163 | EQEKRHQEQRSNDKEHEEYQRRGRGQGHQP   | -46.95 | 22.6 | HHHHHHHHHHHHHHHHHHHHHHHHHHHCCCCCCC |
| 065 | EEKRRKQEQQRSNEKEDEEYQRRGQKGHQS   | -46.94 | 35.5 | HHHHHHHHHHHHHHHHHHHHHHHHHHHCCCCCCC |
| 801 | EEERKKQDKQKNEKEHEEYQRYGRGQGHQP   | -46.93 | 35.5 | HHHHHHHHHHHHHHHHHHHHHHHHHHHCCCCCCC |
| 798 | EEERKKQDKWKNWEHKKYQKKGQGQGHQP    | -46.93 | 35.5 | HHHHHHHHHHHHHHHHHHHHHHHHHHHCCCCCCC |
| 325 | EREERYQDQRKNDKEQEFEYQRRGRGQGHQP  | -46.93 | 25.8 | CHHHHHHHHHHHHHHHHHHHHHHHHHHCCCCCCC |
| 422 | EEERKQRQKKNNEEHEEYQRYGRGQGHQP    | -46.93 | 32.3 | HHHHHHHHHHHHHHHHHHHHHHHHHHHCCCCCCC |
| 287 | EREERYQDKENNEREDKRYQREGRGKGNH    | -46.90 | 41.9 | CHHHHHHHHHHHHHHHHHHHHHHHHHHCCCCCCC |
| 996 | EEEQRKEEDMKNRQEQRYQREGRGQGHQP    | -46.90 | 29.0 | HHHHHHHHHHHHHHHHHHHHHHHHHHHCCCCCCC |
| 927 | EEEQRKQKQYDNDWEHEEYQRKGRGQGHNP   | -46.89 | 25.8 | HHHHHHHHHHHHHHHHHHHHHHHHHHHCCCCCCC |
| 258 | EEEQKQYEDQKNEEHEEYQRKGRGQKGN     | -46.89 | 32.3 | CHHHHHHHHHHCHHHHHHHHHHHHCCCCCCC    |
| 061 | QEEKRRQEDQRSNDKEHEEYQRYGRGQGHQP  | -46.82 | 29.0 | HHHHHHHHHHHHHHHHHHHHHHHHHHHCCCCCCC |
| 623 | EQERRKQEEKRSNEEEDKRYQKQGRGKGHQP  | -46.77 | 35.5 | HHHHHHHHHHHHHHHHHHHHHHHHHHHCCCCCCC |
| 708 | EEERKQEDDKRNEKEHEEYQRYGRGQGHQP   | -46.76 | 38.7 | HHHHHHHHHHHHHHHHHHHHHHHHHHHCCCCCCC |
| 489 | EEERRKQEDKYRNWEHKKYQREGWGQGHYP   | -46.76 | 35.5 | HHHHHHHHHHHHHHHHHHHHHHHHHHHCCCCCCC |
| 269 | EEERKRDRQYKNESEHKRYQRYGKGQGHNH   | -46.76 | 35.5 | HHHHHHHHHHHCHHHHHHHHHHHHCCCCCCC    |
| 114 | EEERKQDQKNDNEQRYQYQYQGGQGNQN     | -46.75 | 32.3 | CHHHHHHHHHHHHHHHHHHHHHHHHHHCCCCCCC |
| 809 | EEERKQRDQEKNDKEHEEYQRRGQKGNH     | -46.75 | 29.0 | HHHHHHHHHHHHHHHHHHHHHHHHHHHCCCCCCC |
| 078 | EQQRRKQEDKERNEKEHKKRYQREGKGQGHNH | -46.72 | 35.5 | HHHHHHHHHHHHHHHHHHHHHHHHHHHCCCCCCC |
| 917 | EEEQKQRDQKNEEQEERYQRYGTGQGHQP    | -46.72 | 35.5 | HHHHHHHHHHHHHHHHHHHHHHHHHHHCCCCCCC |
| 543 | EEEQRKQEDQWRNEWEQEYQRKGRGQGHQP   | -46.72 | 32.3 | HHHHHHHHHHHHHHHHHHHHHHHHHHHCCCCCCC |
| 236 | EQEQRKQDQEKNEEQKRYQREGRGQGHQP    | -46.72 | 29.0 | HHHHHHHHHHHHHHHHHHHHHHHHHHHCCCCCCC |
| 350 | QDEERKQDQDSNDREQKRYQREGRGQGHQP   | -46.70 | 22.6 | CHHHHHHHHHHHHHHHHHHHHHHHHHHCCCCCCC |

|     |                                  |        |      |                                  |
|-----|----------------------------------|--------|------|----------------------------------|
| 116 | DNERRKQHEKESNEKEDKRYQRRGKQGHQP   | -46.69 | 32.3 | CHHHHHHHHHHHHHHHHHHHHHHHHCCCCCCC |
| 498 | EQEQRKEEEQKKNKEDEEYQRRGKGTNN     | -46.69 | 32.3 | HHHHHHHHHHHHHHHHHHHHHHHCCCCCCC   |
| 628 | EEEQRKQHQQSNDKEHEEYQRRGRGQGHQP   | -46.69 | 25.8 | HHHHHHHHHHHHHHHHHHHHHHHCCCCCCC   |
| 675 | EEEERRRDAEKNRREDQRYQREGKKGHNH    | -46.69 | 35.5 | HHHHHHHHHHHHHHHHHHHHHHHCCCCCCC   |
| 676 | EDEERNQYQWKNDYEHEEYQRKGRGKHNP    | -46.68 | 29.0 | CHHHHHHHHHHHHHHHHHHHHHHCCCCCCC   |
| 631 | EQEERKNQEYQWKNEWEDEYYQYGGQKGHQP  | -46.67 | 32.3 | HHHHHHHHHHHHHHHHHHHHHHHCCCCCCC   |
| 301 | EEQERKKQDQSSNDKEQKEYQKQGRGQGHQP  | -46.66 | 32.3 | HHHHHHHHHHHHHHHHHHHHHHHCCCCCCC   |
| 145 | EREQRYKEDQRKNDKEDREYQKQGRGKGHQP  | -46.66 | 32.3 | CHHHHHHHHHHHCHHHHHHHHHHHCCCCCCC  |
| 737 | EEEEKRQDQEKNEKEHKRYQREGRGQGHQP   | -46.64 | 32.3 | HHHHHHHHHHHHHHHHHHHHHHHCCCCCCC   |
| 664 | EEQERKNREQYSNDWEDKRYQREGRGKGHQP  | -46.64 | 35.5 | HHHHHHHHHHHHHHHHHHHHHHHCCCCCCC   |
| 698 | EQEQRKQEDQRKNEKEQKRYQREGKQGHNH   | -46.60 | 29.0 | HHHHHHHHHHHHHHHHHHHHHHHCCCCCCC   |
| 495 | EEEKKEEDQKENEREHEEYQRKGRGQGHQP   | -46.57 | 32.3 | HHHHHHHHHHHHHHHHHHHHHHHCCCCCCC   |
| 881 | DRQRQYHEDQNRNEKEDEEYQRRGQKGHQP   | -46.57 | 35.5 | CHHHHHHHHHHCHHHHHHHHHHHCCCCCCC   |
| 091 | EQEKRHEEQRKNDKEHEEKQRRGQCGKQS    | -46.57 | 19.4 | HHHHHHHHHHHHHHHHHHHHHHHCCCCCCC   |
| 386 | QEERKKQEDQERNQKEHDRYQREGRGQGHQP  | -46.56 | 29.0 | HHHHHHHHHHHHHHHHHHHHHHHCCCCCCC   |
| 393 | EEEEKKRQDQDNNDREHEEYQRRGRGQGHQP  | -46.54 | 35.5 | CHHHHHHHHHHCHHHHHHHHHHHCCCCCCC   |
| 117 | EEEEKKRRDQESNDKEHQRYQREGRGQGHQP  | -46.54 | 32.3 | CHHHHHHHHHHHHHHHHHHHHHHCCCCCCC   |
| 302 | EEERKKREDQKRNEEQQRYQRYGRGQGHQP   | -46.54 | 29.0 | HHHHHHHHHHHHHHHHHHHHHHHCCCCCCC   |
| 288 | EEEEKKKQYDNEYDEEYQRKGRGKGHQP     | -46.52 | 35.5 | CHHHHHHHHHHHHHHHHHHHHHHCCCCCCC   |
| 058 | EEEEKKRDQYKNDSEHERYRQGGQGQGHQS   | -46.52 | 25.8 | HHHHHHHHHHCHHHHHHHHHHHCCCCCCC    |
| 799 | EEEEKQDQQRKNEQKRYQREGKQGHNH      | -46.50 | 32.3 | HHHHHHHHHHHHHHHHHHHHHHHCCCCCCC   |
| 584 | QEQQKKQEDARRNRFEQYQYQKQGQGHQP    | -46.50 | 32.3 | HHHHHHHHHHHHHHHHHHHHHHHCCCCCCC   |
| 601 | QEEEEKKQDQEKNRKEQEEYQRRGRGQGHQP  | -46.49 | 29.0 | CHHHHHHHHHHHHHHHHHHHHHHCCCCCCC   |
| 098 | QEEQKKEDQRKNDAEHRRFQREGQGQKQS    | -46.48 | 29.0 | HHHHHHHHHHHHHHHHHHHHHHHCCCCCCC   |
| 326 | EEEEKKKQDDWRNRWEDYYQKKGQKGHQP    | -46.48 | 38.7 | CHHHHHHHHHHHHHHHHHHHHHHCCCCCCC   |
| 687 | EQQQRHQEEKRRNEKEDKYYQKEGGQKGNQN  | -46.47 | 38.7 | HHHHHHHHHHHHHHHHHHHHHHHCCCCCCC   |
| 052 | EQQQRHQEEQQSNEREDEEYQRRGKKGHNH   | -46.47 | 35.5 | HHHHHHHHHHHHHHHHHHHHHHHCCCCCCC   |
| 974 | EEEEKQLDQKNDKEQRRFQRYGKGQKNN     | -46.42 | 25.8 | CHHHHHHHHHHHHHHHHHHHHHHCCCCCCC   |
| 797 | EEEEKQDQREDEYRDEEYQRKGRGKHNP     | -46.40 | 35.5 | HHHHHHHHHHHHHHHHHHHHHHHCCCCCCC   |
| 574 | EQQQRHQEEQRONEKEDKRYQKEGRGKGHQP  | -46.40 | 35.5 | HHHHHHHHHHHHHHHHHHHHHHHCCCCCCC   |
| 040 | QEEQNHQEEQRNEKEDEEYQRRGRGKGHQP   | -46.40 | 29.0 | CHHHHHHHHHHHHHHHHHHHHHHCCCCCCC   |
| 005 | ENEERKNQEKQKHEKEDKRYQREGRGQGHQP  | -46.39 | 32.3 | CHHHHHHHHHHHHHHHHHHHHHHCCCCCCC   |
| 255 | EEEQRIQEQQRENEREQEEYQKQGWGQGHYP  | -46.39 | 29.0 | HHHHHHHHHHHHHHHHHHHHHHHCCCCCCC   |
| 279 | EQEERKWRDQKKNEEHEERYQQQGRGQGHQP  | -46.34 | 29.0 | CHHHHHHHHHHHHHHHHHHHHHHCCCCCCC   |
| 646 | QEEEEKKRRDQESNEREHKQYFQKKGQKGNH  | -46.33 | 29.0 | CHHHHHHHHHHHHHHHHHHHHHHCCCCCCC   |
| 358 | EEERRKQEDKRRNEEEDKRYQKQGRGKGHQP  | -46.33 | 41.9 | HHHHHHHHHHHHHHHHHHHHHHHCCCCCCC   |
| 722 | EEQERKKQDQYNNDDWEQRRYQREGDQGHQP  | -46.33 | 35.5 | HHHHHHHHHHHHHHHHHHHHHHHCCCCCCC   |
| 014 | EQEERKKQEYQWKNDWEHEEYQYKYGQGHQP  | -46.33 | 22.6 | HHHHHHHHHHHHHHHHHHHHHHHCCCCCCC   |
| 018 | EQERRKQEYQKQKHEKEDKRYQRRGKGHQP   | -46.28 | 35.5 | HHHHHHHHHHHHHHHHHHHHHHHCCCCCCC   |
| 833 | EEQERKKQDQWKNDYEQRSYQREGRGQGHQP  | -46.27 | 32.3 | HHHHHHHHHHHHHHHHHHHHHHHCCCCCCC   |
| 784 | EQEQRHQEEQRKNEKEDKRYQREGRGKGHQP  | -46.27 | 32.3 | HHHHHHHHHHHHHHHHHHHHHHHCCCCCCC   |
| 702 | EQEQRHQEEQRKNEKEDKRYQRYGRGKGHQP  | -46.27 | 32.3 | HHHHHHHHHHHHHHHHHHHHHHHCCCCCCC   |
| 436 | DNQRRRNEEQWRNDWEDQYQKKGQKGHNP    | -46.27 | 29.0 | CHHHHHHHHHHHHHHHHHHHHHHCCCCCCC   |
| 158 | EEEEKKRDQYKNESEQERYQRYGRGQGHQP   | -46.27 | 35.5 | CHHHHHHHHHHCHHHHHHHHHHHCCCCCCC   |
| 649 | EEEEKKEDQRKNEEQQRYQRYGKGQHNH     | -46.27 | 32.3 | HHHHHHHHHHHHHHHHHHHHHHHCCCCCCC   |
| 746 | EEEEKKEDQYRNEWEQEYQRKGRGQGHQP    | -46.27 | 32.3 | HHHHHHHHHHHHHHHHHHHHHHHCCCCCCC   |
| 412 | EEEEKKQDQYNNWEQKRYQREGQGQGHQS    | -46.27 | 35.5 | HHHHHHHHHHHHHHHHHHHHHHHCCCCCCC   |
| 222 | EQEERHQREQKSNEEEDKRFQREGDGKQGN   | -46.26 | 29.0 | CHHHHHHHHHHHHHHHHHHHHHHCCCCCCC   |
| 372 | EQEKRHQEEQRSQEEDDEEYQRRGQKGHQS   | -46.24 | 32.3 | HHHHHHHHHHHHHHHHHHHHHHHCCCCCCC   |
| 496 | EQEKRHQEEQRSNDEEDRRYQRYGQKGHYS   | -46.22 | 29.0 | HHHHHHHHHHHCHHHHHHHHHHHCCCCCCC   |
| 711 | ENEERKQREQESQRKEDERYQREGRGKGHQP  | -46.20 | 29.0 | CHHHHHHHHHHHHHHHHHHHHHHCCCCCCC   |
| 196 | EEEEKKQDQYNNWEQEYQYQRKGRGQKGN    | -46.20 | 32.3 | HHHHHHHHHHHHHHHHHHHHHHHCCCCCCC   |
| 508 | EQEERKRQDQEKNEKEHKRYQREGRGQGHQP  | -46.19 | 29.0 | HHHHHHHHHHHHHHHHHHHHHHHCCCCCCC   |
| 036 | EEQRKEEDKKNEREQKEYQQRGRGQGHQP    | -46.19 | 35.5 | CHHHHHHHHHHHHHHHHHHHHHHCCCCCCC   |
| 311 | EEEEKKQEYQWKNEWEDEYYQKQGQKGHQP   | -46.18 | 35.5 | HHHHHHHHHHHHHHHHHHHHHHHCCCCCCC   |
| 932 | EQEERKKQEYQWKNEWEDEYYQKQGRGKGHQP | -46.18 | 35.5 | HHHHHHHHHHHHHHHHHHHHHHHCCCCCCC   |
| 390 | EQEERHKEEQYRNDYEDEEYQRKGRGKGTQN  | -46.17 | 29.0 | HHHHHHHHHHHHHHHHHHHHHHHCCCCCCC   |
| 121 | EEEEKQDQARKNRYEQEYQRKGRGQGHQP    | -46.17 | 29.0 | HHHHHHHHHHHHHHHHHHHHHHHCCCCCCC   |
| 576 | EEEQKRKYDQEKNRHEHENYQREGRGQGHQP  | -46.17 | 29.0 | HHHHHHHHHHHHHHHHHHHHHHHCCCCCCC   |
| 081 | EEERRKQEDQKNEREHEEYQRKGRGQGHNP   | -46.16 | 32.3 | HHHHHHHHHHHHHHHHHHHHHHHCCCCCCC   |
| 087 | EEEEKQRQYQYNDWEHEERYQREGRGQGHQP  | -46.16 | 25.8 | HHHHHHHHHHHHHHHHHHHHHHHCCCCCCC   |
| 890 | EQQQRHQEEQRRNDKEDERYQQQGWGKGHYP  | -46.15 | 32.3 | HHHHHHHHHHHHHHHHHHHHHHHCCCCCCC   |
| 360 | ENEERKRQEYQEKNEKEDEEYQRRGWGKGHYP | -46.15 | 32.3 | CHHHHHHHHHHHHHHHHHHHHHHCCCCCCC   |
| 284 | EQEKRHQEEQRSNEEEDKRYQKEGRGKGHQP  | -46.14 | 32.3 | HHHHHHHHHHHHHHHHHHHHHHHCCCCCCC   |
| 136 | QEKKNHQEEQRSNEEEDKRYQQRGRGKGHQP  | -46.14 | 32.3 | CHHHHHHHHHHHHHHHHHHHHHHCCCCCCC   |
| 401 | EQEERHQEEQRKNRWEDEYYQKQGQKGHQP   | -46.11 | 29.0 | CHHHHHHHHHHHHHHHHHHHHHHCCCCCCC   |
| 181 | DEERKKQEYKERNEKEDKRYQQQGWGKGHYP  | -46.10 | 38.7 | HHHHHHHHHHHHHHHHHHHHHHHCCCCCCC   |

|     |                                  |        |      |                                         |
|-----|----------------------------------|--------|------|-----------------------------------------|
| 834 | EEEERKKQDQEKNDKEQRRYQREGRGQGHQP  | -46.05 | 29.0 | HHHHHHHHHHHHHHHHHHHHHHHHHHHHHHCCCCCCC   |
| 103 | QEERKKQEDQWRNEWHEHYQRKGGQGHQP    | -46.05 | 32.3 | HHHHHHHHHHHHHHHHHHHHHHHHHHHHHHCCCCCCC   |
| 294 | EQEERKKQEQFSNDFECHKYQQKGGQGHQP   | -46.05 | 25.8 | HHHHHHHHHHHHHHHHHHHHHHHHHHHHHHCCCCCCC   |
| 500 | EHEERRQEQQRKNEYEDEEYQRKGRGKHQP   | -46.04 | 32.3 | CHHHHHHHHHHHHHHHHHHHHHHHHHHHHHHHCCCCCCC |
| 274 | EQEERKRQDQERNDKEQEYQRKGRGKHQP    | -46.03 | 25.8 | HHHHHHHHHHHHHHHHHHHHHHHHHHHHHHCCCCCCC   |
| 774 | EQEQRHNEEQRSNREDEERYQREGKGGHNN   | -46.01 | 29.0 | HHHHHHHHHHHHHHHHHHHHHHHHHHHHHHCCCCCCC   |
| 418 | EEERRKQEEQERNEKEDKRYQRYGRGKHQP   | -46.00 | 35.5 | HHHHHHHHHHHHHHHHHHHHHHHHHHHHHHCCCCCCC   |
| 815 | EEEQRKKEDKRNKEEEQKYYQEQGRGQGHQP  | -45.99 | 35.5 | HHHHHHHHHHHHHHHHHHHHHHHHHHHHHHCCCCCCC   |
| 748 | EQERRKQEQRSNRKEDEEYQRRGRGKHQP    | -45.98 | 29.0 | HHHHHHHHHHHHHHHHHHHHHHHHHHHHHHCCCCCCC   |
| 220 | EEEERKQRDQEKNEKEHERYQKQGRGQGHQP  | -45.97 | 32.3 | HHHHHHHHHHHHHHHHHHHHHHHHHHHHHHCCCCCCC   |
| 891 | QEEEKKRQDQEKNEKEQKRYQRYGRGKHQP   | -45.97 | 35.5 | CHHHHHHHHHHHHHHHHHHHHHHHHHHHHHHHCCCCCCC |
| 723 | ERQERYQRDQESNEKEDKRYQRYGRGKHQP   | -45.96 | 38.7 | CHHHHHHHHHHHHHHHHHHHHHHHHHHHHHHHCCCCCCC |
| 769 | EQEQRKQEEQRRNDKEQRRYQREGKGGHNN   | -45.96 | 22.6 | HHHHHHHHHHHHHHHHHHHHHHHHHHHHHHCCCCCCC   |
| 521 | EQEERIQRDDYKRWVHEEYQRKGRGQGHQP   | -45.95 | 25.8 | CHHHHHHHHHHHHHHHHHHHHHHHHHHHHHHHCCCCCCC |
| 023 | EQEKRHQEEQRKNEEEDERYQRQGQGHQS    | -45.95 | 32.3 | HHHHHHHHHHHHHHHHHHHHHHHHHHHHHHCCCCCCC   |
| 407 | EEEQKKRQDQENNEKEHEEYQRRGRGQGHQP  | -45.94 | 38.7 | HHHHHHHHHHHHHHHHHHHHHHHHHHHHHHCCCCCCC   |
| 607 | EEEQRKHQENRNEKEDKRYQRYGQGKHQS    | -45.91 | 35.5 | HHHHHHHHHHHHHHHHHHHHHHHHHHHHHHCCCCCCC   |
| 408 | EEERRKQEDQKSNEQEHERYQREGQGQGHQP  | -45.89 | 35.5 | CHHHHHHHHHHHHHHHHHHHHHHHHHHHHHHHCCCCCCC |
| 226 | EEERKKQRDQEKNDKEQEYQRRGQGHNP     | -45.88 | 32.3 | HHHHHHHHHHHHHHHHHHHHHHHHHHHHHHCCCCCCC   |
| 184 | EQEERHKKEQEKNDKEDDEEYQRYGRGKHQP  | -45.85 | 29.0 | CHHHHHHHHHHCHHHHHHHHHHHCCCCCCC          |
| 905 | EEERRKQEDKERNEKEQKQYQRRGQGHNN    | -45.82 | 35.5 | HHHHHHHHHHHHHHHHHHHHHHHHHHHHHHCCCCCCC   |
| 180 | ERQQRYQEDQYRNEYEQEYQRKGRGQGHQP   | -45.82 | 32.3 | HHHHHHHHHHHHHHHHHHHHHHHHHHHHHHCCCCCCC   |
| 791 | EEEERKRQDQEKNDREQKRYQREGRGQGHQP  | -45.76 | 29.0 | HHHHHHHHHHHHHHHHHHHHHHHHHHHHHHCCCCCCC   |
| 886 | EEEERKRQDQESNEREHKRYQREGRGQGHQP  | -45.76 | 32.3 | HHHHHHHHHHHHHHHHHHHHHHHHHHHHHHCCCCCCC   |
| 964 | EEERRKQEDKERNEKEQKRYQREGRGQGHQP  | -45.74 | 35.5 | HHHHHHHHHHHHHHHHHHHHHHHHHHHHHHCCCCCCC   |
| 034 | EQEKRHQEEQRSNKEDEEYQRRGKGGHNN    | -45.72 | 32.3 | HHHHHHHHHHHHHHHHHHHHHHHHHHHHHHCCCCCCC   |
| 095 | QQQQNHQEEKRNEKEHKRYQRYGQGHN      | -45.68 | 29.0 | CHHHHHHHHHHHHHHHHHHHHHHHHHHHHHHHCCCCCCC |
| 345 | EQERRLQEDQYRNEWQEYQRYQRKGRGQGHQP | -45.66 | 29.0 | HHHHHHHHHHHHHHHHHHHHHHHHHHHHHHCCCCCCC   |
| 800 | EEEQRKQEDDKRNKEHEERYQREGRGQGHQP  | -45.64 | 29.0 | HHHHHHHHHHHHHHHHHHHHHHHHHHHHHHCCCCCCC   |
| 632 | EQEERHQEQQRKNDKEDREYQKQGRGKHQP   | -45.63 | 29.0 | CHHHHHHHHHHCHHHHHHHHHHHCCCCCCC          |
| 241 | EQEERHKQEEYRNDWEDERYQREGQGHQS    | -45.61 | 29.0 | HHHHHHHHHHHHHHHHHHHHHHHHHHHHHHCCCCCCC   |
| 752 | EQEKRHQEEQRKNDKEHEEFQRKGRGQGHQP  | -45.58 | 19.4 | HHHHHHHHHHHHCHHHHHHHHHHHCCCCCCC         |
| 025 | EQEERHQEQWKNRWEDEFYQKQGRGKHQP    | -45.57 | 32.3 | CHHHHHHHHHHHHHHHHHHHHHHHHHHHHHHHCCCCCCC |
| 941 | EQEQRHQEQQDSNRDEEYQRRGQGHQP      | -45.54 | 29.0 | HHHHHHHHHHHHHHHHHHHHHHHHHHHHHHCCCCCCC   |
| 246 | EEEERKKQQQYKNEWDKRYQREGDGKHNP    | -45.54 | 35.5 | HHHHHHHHHHHHHHHHHHHHHHHHHHHHHHCCCCCCC   |
| 678 | EEEQRKQEDQKNEREDEEYQRRGQGHQS     | -45.50 | 38.7 | HHHHHHHHHHHHHHHHHHHHHHHHHHHHHHCCCCCCC   |
| 602 | EQEERKQQKRNKEKEQKRYQREGRGQGHQP   | -45.49 | 29.0 | HHHHHHHHHHHHHHHHHHHHHHHHHHHHHHCCCCCCC   |
| 533 | QEERKKQHDEKNQKEDRYQREGRGQGHQP    | -45.41 | 29.0 | HHHHHHHHHHHHHHHHHHHHHHHHHHHHHHCCCCCCC   |
| 544 | QEQEKKEDEQNRNKEQEYQRYQREGRGQGHQP | -45.39 | 32.3 | CHHHHHHHHHHHHHHHHHHHHHHHHHHHHHHHCCCCCCC |
| 671 | EQEQRHQEEQRKNDKEHEERYQRRGQGHQP   | -45.38 | 22.6 | HHHHHHHHHHHHHHHHHHHHHHHHHHHHHHCCCCCCC   |
| 336 | EQEERHQEQQRKNEKEDDEEYQRRGQGHQP   | -45.33 | 32.3 | CHHHHHHHHHHHHHHHHHHHHHHHHHHHHHHHCCCCCCC |
| 715 | DEERKKQEDQERNDKEQKRYQREGQGHQP    | -45.33 | 29.0 | CHHHHHHHHHHHHHHHHHHHHHHHHHHHHHHHCCCCCCC |
| 816 | EEEQRKQHDQEKNDKEQEEYQKRRGQGHQP   | -45.33 | 29.0 | HHHHHHHHHHHHHHHHHHHHHHHHHHHHHHCCCCCCC   |
| 182 | EEERRRQEYRNEWEDERYQRQGGKGGHNN    | -45.32 | 35.5 | HHHHHHHHHHHHHHHHHHHHHHHHHHHHHHCCCCCCC   |
| 090 | EQQERKRQDQESNRDEEYQRYQKQGRGKHQP  | -45.30 | 29.0 | HHHHHHHHHHHHHHHHHHHHHHHHHHHHHHCCCCCCC   |
| 459 | EQEQRHQEQKRSNEKEHEEYQRRGQGHQP    | -45.29 | 29.0 | HHHHHHHHHHHHHHHHHHHHHHHHHHHHHHCCCCCCC   |
| 314 | EEEERKRQDQEKNEKEQKRYQREGRGQGHQP  | -45.25 | 32.3 | HHHHHHHHHHHHHHHHHHHHHHHHHHHHHHCCCCCCC   |
| 214 | EEEQRKQEQRRNEKEQEYQRYQREGQGHYP   | -45.25 | 29.0 | HHHHHHHHHHHHHHHHHHHHHHHHHHHHHHCCCCCCC   |
| 129 | QREKEKEEQRSNEKEDEEYQRRGRGKHQP    | -45.24 | 29.0 | CHHHHHHHHHHHHHHHHHHHHHHHHHHHHHHHCCCCCCC |
| 063 | EEEQRKQEQHRKNRKEDEEYQRRGRGKHQP   | -45.23 | 32.3 | HHHHHHHHHHHHHHHHHHHHHHHHHHHHHHCCCCCCC   |
| 225 | EEEKREEQQRNEEEDQRYQRYGRGKHQP     | -45.21 | 35.5 | HHHHHHHHHHHHHHHHHHHHHHHHHHHHHHCCCCCCC   |
| 234 | EQEQRKQEEQKRNKEEYQRYQREGKGGHNN   | -45.20 | 22.6 | HHHHHHHHHHHHHHHHHHHHHHHHHHHHHHCCCCCCC   |
| 064 | EEEERKRQEQESNEREDRYQREGRGKHQP    | -45.19 | 35.5 | HHHHHHHHHHHHHHHHHHHHHHHHHHHHHHCCCCCCC   |
| 650 | EQEERHKQEQYKNDYEDREYQRKGRGKHQP   | -45.14 | 29.0 | HHHHHHHHHHHHHHHHHHHHHHHHHHHHHHCCCCCCC   |
| 178 | EEEERKRQDDEKQRKEDEEYQRRGRGKHQP   | -45.13 | 35.5 | HHHHHHHHHHHHHHHHHHHHHHHHHHHHHHCCCCCCC   |
| 660 | EQEQRHQEEQRRNDKEHQRYQREGRGQGHQP  | -45.12 | 22.6 | HHHHHHHHHHHHHHHHHHHHHHHHHHHHHHCCCCCCC   |
| 600 | EEEERKRQDQENNDREQERYQRQGRGQGHQP  | -45.12 | 32.3 | HHHHHHHHHHHHHHHHHHHHHHHHHHHHHHCCCCCCC   |
| 597 | EREQRYYEEDQKNEQEHSRYQKQGGQGHNN   | -45.12 | 29.0 | HHHHHHHHHHHHHHHHHHHHHHHHHHHHHHCCCCCCC   |
| 270 | EEERKKQEDQERNEKEQEYQRYQREGKGGHNN | -45.11 | 35.5 | HHHHHHHHHHHHHHHHHHHHHHHHHHHHHHCCCCCCC   |
| 054 | EEERKKQEDQYRNEYEQEYQRKGRGQGHQP   | -45.11 | 35.5 | HHHHHHHHHHHHHHHHHHHHHHHHHHHHHHCCCCCCC   |
| 171 | EEEKRKQEDHRKNREEQEKYQREGKGGHNN   | -45.08 | 29.0 | HHHHHHHHHHHHHHHHHHHHHHHHHHHHHHCCCCCCC   |
| 695 | EEEERKRQDQEKNEKEQEYQRRGRGQGHQP   | -45.07 | 32.3 | HHHHHHHHHHHHHHHHHHHHHHHHHHHHHHCCCCCCC   |
| 561 | EEEERKRQDQESNEKEQKQYQKQGRGQGHQP  | -45.07 | 32.3 | HHHHHHHHHHHHHHHHHHHHHHHHHHHHHHCCCCCCC   |
| 610 | EQEERHKQEQWKNWEDKYYQKGGQGHQS     | -45.07 | 32.3 | HHHHHHHHHHHHHHHHHHHHHHHHHHHHHHCCCCCCC   |
| 785 | QQEQNKEDDKRHRYEDEEYQRKGRGKHQP    | -45.03 | 32.3 | CHHHHHHHHHHHHHHHHHHHHHHHHHHHHHHHCCCCCCC |
| 150 | DEERKKQHDQESNEKEQKRYQRYQGGQGHQS  | -45.03 | 32.3 | HHHHHHHHHCHHHHHHHHHHHHHHHHHHHHHCCCCCCC  |
| 278 | EEEERKKQDDKRNREEHQRYQREGWGHYP    | -45.02 | 29.0 | HHHHHHHHHHHHHHHHHHHHHHHHHHHHHHCCCCCCC   |





**Table S2.** Summary of 991 peptide sequences designed using EvoEF2 and the evolutionary profile (weight = 0.25).

| #label | #peptide                           | #binding (EEU) | #SeqID(%) | #Secondary structure                   |
|--------|------------------------------------|----------------|-----------|----------------------------------------|
| WT     | EEQAKTFLDKFNHEAEDLFYQSSSGLGKGDFR   | -46.46         | 100.      | HHHHHHHHHHHHHHHHHHHHHHHHHHHHHHCCCCCCCC |
| 185    | EQEQR IQDQDQFSNEFEDKRYQQQKGKGGHSH  | -52.40         | 38.7      | HHHHHHHHHHHHHHHHHHHHHHHHHHHHHHCCCCCCCC |
| 416    | EEERRKQLDQKKQDEEDSRFQQQGRGKGGKQN   | -51.50         | 35.5      | HHHHHHHHHHHHHHHHHHHHHHHHHHHHHHCCCCCCCC |
| 731    | EEEQRKQDQKYNQESSEDKRYQRYGKGGHNP    | -51.43         | 45.2      | HHHHHHHHHHHHHHHHHHHHHHHHHHHHHHCCCCCCCC |
| 208    | EEQQRKQDQKYNNESEDKRFQRYGKGGKGS     | -51.41         | 48.4      | HHHHHHHHHHHCHHHHHHHHHHHCCCCCCCC        |
| 148    | EEEQRKQDQKDNNEEDKRYQREGQGGKGGHQS   | -51.13         | 48.4      | HHHHHHHHHHHHHHHHHHHHHHHHHHHHHHCCCCCCCC |
| 765    | EEEQKKQDQKYNNEWEDKRYQREGGKGGHQP    | -51.13         | 48.4      | HHHHHHHHHHHHHHHHHHHHHHHHHHHHHHCCCCCCCC |
| 859    | EEEQKKQDQKYNNEYEDKRYQKEGWGKGHYP    | -51.13         | 48.4      | HHHHHHHHHHHHHHHHHHHHHHHHHHHHHHCCCCCCCC |
| 840    | EEEQKKQRDKYNNEHEDKRYQQQGGKGGHNNH   | -51.13         | 48.4      | HHHHHHHHHHHHHHHHHHHHHHHHHHHHHHCCCCCCCC |
| 350    | EEEQKKQRDKYNNESEDKRYQRYGKGGHNP     | -51.13         | 48.4      | HHHHHHHHHHHCHHHHHHHHHHHCCCCCCCC        |
| 666    | EEEQRKQDQKKNNEEDKRYQRYGKGGHNS      | -51.13         | 45.2      | HHHHHHHHHHHHHHHHHHHHHHHHHHHHHHCCCCCCCC |
| 725    | EEEQRKQDQKYNNEEDKRYQREGWGGKGGHNP   | -51.13         | 45.2      | HHHHHHHHHHHCHHHHHHHHHHHCCCCCCCC        |
| 830    | EEEQRKQDQKYNNEYEDKRYQRKGGKGGHQP    | -51.13         | 45.2      | HHHHHHHHHHHHHHHHHHHHHHHHHHHHHHCCCCCCCC |
| 119    | EEEQRKQDQKYNNEYEDKEYQRKGGKGGHQP    | -51.13         | 45.2      | HHHHHHHHHHHHHHHHHHHHHHHHHHHHHHCCCCCCCC |
| 835    | EQEQRKQDQKYNNEYEDKEYQRKGGKGGHQP    | -51.13         | 41.9      | HHHHHHHHHHHHHHHHHHHHHHHHHHHHHHCCCCCCCC |
| 609    | EEEQRKQEDKRNNEQEDKRYQRYGKGGHQP     | -51.13         | 45.2      | HHHHHHHHHHHHHHHHHHHHHHHHHHHHHHCCCCCCCC |
| 697    | EEEEKKQDQKFKNEFEDKRYQQQGGKGGHNNH   | -51.00         | 48.4      | CHHHHHHHHHHHHHHHHHHHHHHHHHHHHHCCCCCCCC |
| 791    | EEEEERKQRDKFNNEYEDKRYQQQGGKGGHQS   | -51.00         | 48.4      | HHHHHHHHHHHHHHHHHHHHHHHHHHHHHHCCCCCCCC |
| 342    | EEEERKQRDKYNNEAEDKRYQREGGKGGHQP    | -51.00         | 48.4      | HHHHHHHHHHHHHHHHHHHHHHHHHHHHHHCCCCCCCC |
| 359    | EEEEERKQRDKYNNEYEDKRYQKEGGRGKGGHQP | -51.00         | 45.2      | HHHHHHHHHHHHHHHHHHHHHHHHHHHHHHCCCCCCCC |
| 499    | EEERKKQLDKWKNFEFEDKRYQQQGGKGGHQS   | -51.00         | 48.4      | HHHHHHHHHHHHHHHHHHHHHHHHHHHHHHCCCCCCCC |
| 659    | EEERRKQEDKYRNEWEDEEYQRKGGKGGHQP    | -51.00         | 41.9      | HHHHHHHHHHHHHHHHHHHHHHHHHHHHHHCCCCCCCC |
| 393    | EEERRKQLDKFKNEFEDKRYQQQGGKGGHSS    | -51.00         | 48.4      | HHHHHHHHHHHHHHHHHHHHHHHHHHHHHHCCCCCCCC |
| 453    | EEERRKQLDKQSNEEDKRYQRYGGKGGHQS     | -51.00         | 45.2      | HHHHHHHHHHHHHHHHHHHHHHHHHHHHHHCCCCCCCC |
| 368    | EEERRKQLDKWKNFEFEDKRYQREGGKGGHQP   | -51.00         | 45.2      | HHHHHHHHHHHHHHHHHHHHHHHHHHHHHHCCCCCCCC |
| 085    | EEERRKQLDKYKNEAEDKRYQRYGKGGHNS     | -51.00         | 48.4      | HHHHHHHHHHHHHHHHHHHHHHHHHHHHHHCCCCCCCC |
| 384    | EEERRKQLDKYNNEAEDKRYQREGQGGKGGHQS  | -51.00         | 51.6      | HHHHHHHHHHHHHHHHHHHHHHHHHHHHHHCCCCCCCC |
| 683    | EEEKRRQEDKRRHEKEDEEYQRRGGKGGHNP    | -50.98         | 45.2      | HHHHHHHHHHHHHHHHHHHHHHHHHHHHHHCCCCCCCC |
| 805    | EEEEERKQDKRNNEKEDKRYQRYGKGGHYP     | -50.94         | 45.2      | HHHHHHHHHHHHHHHHHHHHHHHHHHHHHHCCCCCCCC |
| 959    | DEERKQEDQYRNDWEDEEYQRKGGKGGHQP     | -50.89         | 35.5      | HHHHHHHHHHHHHHHHHHHHHHHHHHHHHHCCCCCCCC |
| 186    | EEEEERKQRDKMKNKEDKEYQKGGKGGHQP     | -50.89         | 35.5      | HHHHHHHHHHHHHHHHHHHHHHHHHHHHHHCCCCCCCC |
| 471    | EQEERKNQDKYNNEYEDDEEYQRKGGKGGHNP   | -50.83         | 41.9      | HHHHHHHHHHHHHHHHHHHHHHHHHHHHHHCCCCCCCC |
| 726    | EEEKRRQEDKRNNEEDKRYQREGWGGKGGHNP   | -50.81         | 45.2      | HHHHHHHHHHHHHHHHHHHHHHHHHHHHHHCCCCCCCC |
| 321    | EEEKRRQLDKYKNEAEDKRYQQQGGKGGHNP    | -50.81         | 48.4      | HHHHHHHHHHHHHHHHHHHHHHHHHHHHHHCCCCCCCC |
| 279    | EEEQRKQDQKYNNEYEDKMYQREGKGGKGGHSH  | -50.74         | 45.2      | HHHHHHHHHHHHHHHHHHHHHHHHHHHHHHCCCCCCCC |
| 407    | EEERRKQLDQESQEKEDQYQRYGMGGHQP      | -50.54         | 41.9      | HHHHHHHHHHHHHHHHHHHHHHHHHHHHHHCCCCCCCC |
| 669    | EEEQRKQDQYNNNDWEDQRYQREGGKGGHQP    | -50.50         | 38.7      | HHHHHHHHHHHHHHHHHHHHHHHHHHHHHHCCCCCCCC |
| 793    | EEEQKKQRDQYNNDSERDRFQREGKGGKGGHNP  | -50.49         | 38.7      | HHHHHHHHHHCCCCCHHHHHHHHHHHCCCCCCCC     |
| 087    | EEEQRKQDQYNQEWEDDEYQRKGGKGGHQP     | -50.48         | 41.9      | HHHHHHHHHHHHHHHHHHHHHHHHHHHHHHCCCCCCCC |
| 909    | EEEQRKQDQYNNQEWEDKEYQREGGKGGHSS    | -50.48         | 41.9      | HHHHHHHHHHHHHHHHHHHHHHHHHHHHHHCCCCCCCC |
| 467    | EEEQRKQDQYNNQEYEDDEEYQRKGGKGGHQP   | -50.48         | 41.9      | HHHHHHHHHHHHHHHHHHHHHHHHHHHHHHCCCCCCCC |
| 943    | EEEEERKQDQRNQEKEDEDERYQQQGRGKGGHQP | -50.48         | 41.9      | HHHHHHHHHHHHHHHHHHHHHHHHHHHHHHCCCCCCCC |
| 993    | EEEQRKQDQNNNEREDDEYQQQGRGKGGHQP    | -50.37         | 41.9      | HHHHHHHHHHHHHHHHHHHHHHHHHHHHHHCCCCCCCC |
| 658    | EEEQKKQRDQFNNEFEHEYYQQKGGKGGHNNH   | -50.35         | 41.9      | HHHHHHHHHHHHHHHHHHHHHHHHHHHHHHCCCCCCCC |
| 962    | EEEQKKQDQKYNNESEDKRYQRYGKGGHQP     | -50.33         | 48.4      | HHHHHHHHHHHCHHHHHHHHHHHCCCCCCCC        |
| 296    | EEEQKKQRDKYNNEYEDQYQRKGGKGGHNNH    | -50.33         | 48.4      | HHHHHHHHHHHHHHHHHHHHHHHHHHHHHHCCCCCCCC |
| 102    | EEEQRKQDQKYNNEWEDEEYQRKGGKGGHNS    | -50.33         | 48.4      | HHHHHHHHHHHHHHHHHHHHHHHHHHHHHHCCCCCCCC |
| 438    | EEEEERKKQDKQNNNEKEDKRFQREGQGGKGGQS | -50.31         | 41.9      | HHHHHHHHHHHHHHHHHHHHHHHHHHHHHHCCCCCCCC |
| 526    | EEEQKKQRDQRNNEQEDKRYQRYGKGGHQP     | -50.31         | 45.2      | HHHHHHHHHHHHHHHHHHHHHHHHHHHHHHCCCCCCCC |
| 677    | EEEQRKQEDQRKNEKEDKRYQREGKGGKGGHSH  | -50.31         | 38.7      | HHHHHHHHHHHHHHHHHHHHHHHHHHHHHHCCCCCCCC |
| 893    | EEERRKQLDQKNNDEEHRRYQRYGWRGGHNP    | -50.29         | 35.5      | HHHHHHHHHHHCHHHHHHHHHHHCCCCCCCC        |
| 776    | EEEQRKQLDKKNNEEDKRYQREGKGGKGGHSH   | -50.29         | 48.4      | HHHHHHHHHHHHHHHHHHHHHHHHHHHHHHCCCCCCCC |
| 966    | EEEEKKQDQRKQEEDEDERYQQQGRGKGGHQP   | -50.29         | 41.9      | CHHHHHHHHHHHHHHHHHHHHHHHHHHHHHCCCCCCCC |
| 429    | EEQQRKQEDQYRNDHEDKRYQREGGKGGHQP    | -50.26         | 38.7      | HHHHHHHHHHHHHHHHHHHHHHHHHHHHHHCCCCCCCC |
| 343    | EEEQRKQDQRNQRQEDERYQREGKGGKGGHNNH  | -50.26         | 38.7      | HHHHHHHHHHHHHHHHHHHHHHHHHHHHHHCCCCCCCC |
| 808    | EEEQKKQRDQYNNNDWEDRRYQREGKGGKGGHSS | -50.25         | 41.9      | HHHHHHHHHHHHHCHHHHHHHHHHHCCCCCCCC      |
| 377    | EEEEERKKQDKYKNESEDKRYQQQGGKGGHNNH  | -50.25         | 41.9      | HHHHHHHHHHHHHHHHHHHHHHHHHHHHHHCCCCCCCC |
| 380    | EEERKKQLDQKKNNEEDSRYYQQQGGKGGHNS   | -50.24         | 45.2      | HHHHHHHHHHHHHHHHHHHHHHHHHHHHHHCCCCCCCC |
| 614    | EEERRKQLDQENNEKEDQRYQREGKGGKGGHNNH | -50.24         | 45.2      | HHHHHHHHHHHHHHHHHHHHHHHHHHHHHHCCCCCCCC |
| 202    | EEEQKKQRDQRNQEKEDEEYQRYGKGGHYP     | -50.22         | 45.2      | HHHHHHHHHHHHHHHHHHHHHHHHHHHHHHCCCCCCCC |
| 442    | EEEQKKQRDQYNNRYEDEEYQRKGGKGGHQP    | -50.22         | 41.9      | HHHHHHHHHHHHHHHHHHHHHHHHHHHHHHCCCCCCCC |
| 918    | EQQQRKQDQYNNNESEDQRYQRYGKGGHNP     | -50.18         | 41.9      | HHHHHHHHHHHCHCHHHHHHHHHCCCCCCCC        |
| 328    | EEEEERKNRDQYNQEWEDDEEYQRKGGKGGHQP  | -50.18         | 41.9      | HHHHHHHHHHHHHHHHHHHHHHHHHHHHHHCCCCCCCC |
| 092    | EEEQKKQRDQFNNEEDKRYQREGGKGGHQP     | -50.18         | 48.4      | HHHHHHHHHHHCHHHHHHHHHHHCCCCCCCC        |



|     |                                  |        |      |                                      |
|-----|----------------------------------|--------|------|--------------------------------------|
| 530 | EEEQKKQRDQYNNEAEDERYQRQNGKGHSH   | -50.18 | 48.4 | HHHHHHHHHHHHHHHHHHHHHHHHHHHHHCCCCCCC |
| 262 | EEEQKKQRDQYNNEADKRYQRYGKGGHNP    | -50.18 | 48.4 | HHHHHHHHHHHHHHHHHHHHHHHHHHHHHCCCCCCC |
| 820 | EEEQKKQRDQYNNEWEEDEYQRKGRGKGHP   | -50.18 | 45.2 | HHHHHHHHHHHHHHHHHHHHHHHHHHHHHCCCCCCC |
| 678 | EEEQKKQRDQYNNEWEDERYQRQGWGKGYF   | -50.18 | 45.2 | HHHHHHHHHHHHHHHHHHHHHHHHHHHHHCCCCCCC |
| 418 | EEEQKKQRDQYNNEYEDEEYQRKGRGKGNP   | -50.18 | 45.2 | HHHHHHHHHHHHHHHHHHHHHHHHHHHHHCCCCCCC |
| 130 | EEEQKKQRDQYNNEYEDQEYQRTGRGKGHQP  | -50.18 | 45.2 | HHHHHHHHHHHHHHHHHHHHHHHHHHHHHCCCCCCC |
| 914 | EEEQRKQEDQYRNEYEDQEYQRKGRGKGHQP  | -50.18 | 38.7 | HHHHHHHHHHHHHHHHHHHHHHHHHHHHHCCCCCCC |
| 014 | EEEQRKQQDQKNNEEEDERYQQQGKGYF     | -50.18 | 41.9 | HHHHHHHHHHHHHHHHHHHHHHHHHHHHHCCCCCCC |
| 802 | EEEQRKQQDQKNNEEEDKRYQRYGRGKGHQP  | -50.18 | 41.9 | HHHHHHHHHHHHHHHHHHHHHHHHHHHHHCCCCCCC |
| 487 | EEEQRKQQDQYNNEADKRYQRYGRGKGHQP   | -50.18 | 45.2 | HHHHHHHHHHHHHHHHHHHHHHHHHHHHHCCCCCCC |
| 144 | EEEQRKQQDQYNNEADQRYQQQGRGKGHQP   | -50.18 | 45.2 | HHHHHHHHHHHHHHHHHHHHHHHHHHHHHCCCCCCC |
| 055 | EEEQRKQQDQYNNEADQRYQREGKGGKGNH   | -50.18 | 45.2 | HHHHHHHHHHHHHHHHHHHHHHHHHHHHHCCCCCCC |
| 861 | EEEQRKQQDQYNNEFEDQMYQRYGKGGKGHQP | -50.18 | 41.9 | HHHHHHHHHHHHHHHHHHHHHHHHHHHHHCCCCCCC |
| 941 | EEEQRKQQDQYNNESEDQRYQQYGKGGKGYF  | -50.18 | 41.9 | HHHHHHHHHHHHHHHHHHHHHHHHHHHHHCCCCCCC |
| 196 | EEEQRKQQDQYNNEWEDKRYQREGKGGKGHQP | -50.18 | 41.9 | HHHHHHHHHHHHHHHHHHHHHHHHHHHHHCCCCCCC |
| 767 | EEEQRKQQDQYNNEYEDEEYQRKGRGKGHQP  | -50.18 | 41.9 | HHHHHHHHHHHHHHHHHHHHHHHHHHHHHCCCCCCC |
| 833 | EEEQRKQQDQYNNEYEDKYQKGGKGGKHS    | -50.18 | 41.9 | HHHHHHHHHHHHHHHHHHHHHHHHHHHHHCCCCCCC |
| 829 | EEEQRKQQDQYNNEYEDQYQKGGKGGKHS    | -50.18 | 41.9 | HHHHHHHHHHHHHHHHHHHHHHHHHHHHHCCCCCCC |
| 040 | EEEQRKQQDQYSNEYEDEEYQRKGRGKGHQP  | -50.18 | 38.7 | HHHHHHHHHHHHHHHHHHHHHHHHHHHHHCCCCCCC |
| 382 | EEEQRKQQDQYSNEYEDKEYQKGGKGGKGNH  | -50.18 | 38.7 | HHHHHHHHHHHHHHHHHHHHHHHHHHHHHCCCCCCC |
| 379 | EEEEERKQQDQRSNEKEDEEYQRRGKGGKGNH | -50.18 | 38.7 | HHHHHHHHHHHHHHHHHHHHHHHHHHHHHCCCCCCC |
| 929 | EEEEERKQQDQRSNEQEDQRYQREGKGGKHS  | -50.18 | 38.7 | HHHHHHHHHHHHHHHHHHHHHHHHHHHHHCCCCCCC |
| 167 | EQEQRKQEDQRKNEKEDKRYQREGKGGKGHSH | -50.18 | 35.5 | HHHHHHHHHHHHHHHHHHHHHHHHHHHHHCCCCCCC |
| 063 | EEEARKQQDQYNQEWEDQRYQREGKGGKGNH  | -50.16 | 45.2 | HHHHHHHHHHHHHHHHHHHHHHHHHHHHHCCCCCCC |
| 094 | DEERKKQLEDQYRNDYEDREYQRKGRGKGHQP | -50.12 | 35.5 | HHHHHHHHHHHHHHHHHHHHHHHHHHHHHCCCCCCC |
| 509 | EEERRKQLDQMKNDKEDREYQRSQGKGGKHS  | -50.12 | 41.9 | HHHHHHHHHHHHHHHHHHHHHHHHHHHHHCCCCCCC |
| 173 | EEERRKQLDQWKNDYEDRYQQQGKGGKGHQP  | -50.12 | 38.7 | HHHHHHHHHHHHHHHHHHHHHHHHHHHHHCCCCCCC |
| 632 | EEERRKQQDQYSNDYEDREYQRKGRGKGHQP  | -50.12 | 35.5 | HHHHHHHHHHHHHHHHHHHHHHHHHHHHHCCCCCCC |
| 657 | EQEERKQRDQYNNEADQRFQREGKGGKGNH   | -50.10 | 38.7 | HHHHHHHHHHHHHHHHHHHHHHHHHHHHHCCCCCCC |
| 934 | EEEKKKQEDQRNNEEDERYQREGKGGKGHSH  | -50.09 | 41.9 | HHHHHHHHHHHHHHHHHHHHHHHHHHHHHCCCCCCC |
| 860 | EEEEERKQQDQRKNKEDDEEYQKGGKGGKHS  | -50.06 | 35.5 | HHHHHHHHHHHHHHHHHHHHHHHHHHHHHCCCCCCC |
| 690 | EQEERKQQDQRKNEKEDEEYQRKGRGKGHQP  | -50.05 | 35.5 | HHHHHHHHHHHHHHHHHHHHHHHHHHHHHCCCCCCC |
| 336 | DEERKKQEDQYRNEWEDEEYQRKGRGKGNP   | -50.05 | 38.7 | HHHHHHHHHHHHHHHHHHHHHHHHHHHHHCCCCCCC |
| 243 | EEEEERKQQDQYNNESEDKRYQRYGKGGHNP  | -50.05 | 41.9 | HHHHHHHHHHHHHHHHHHHHHHHHHHHHHCCCCCCC |
| 968 | EEEEERKQRDQFNNEFEDQYQRYGKGGKGNP  | -50.05 | 45.2 | HHHHHHHHHHHHHHHHHHHHHHHHHHHHHCCCCCCC |
| 383 | EEEEERKQRDQQSNEEEDQRYQRYGKGGHNP  | -50.05 | 38.7 | HHHHHHHHHHHHHHHHHHHHHHHHHHHHHCCCCCCC |
| 661 | EEEEERKQRDQYNNEADKRYQREGKGGKHS   | -50.05 | 45.2 | HHHHHHHHHHHHHHHHHHHHHHHHHHHHHCCCCCCC |
| 149 | EEEEERKQRDQYNNEYEDEEYQRKGRGKGHQP | -50.05 | 41.9 | HHHHHHHHHHHHHHHHHHHHHHHHHHHHHCCCCCCC |
| 203 | EEEKKKQEDQRNNEEEDKRYQREGKGGKGHQP | -50.05 | 45.2 | HHHHHHHHHHHHHHHHHHHHHHHHHHHHHCCCCCCC |
| 994 | EEEKRRQEDQRNNEEEDERYQRYGKGGKGYF  | -50.05 | 41.9 | HHHHHHHHHHHHHHHHHHHHHHHHHHHHHCCCCCCC |
| 054 | EEEKRRQEDQRNNEEEDKRYQREGKGGKGNH  | -50.05 | 41.9 | HHHHHHHHHHHHHHHHHHHHHHHHHHHHHCCCCCCC |
| 200 | EEERKKQLDQNNNEEEDKRYQRYGKGGKHS   | -50.05 | 48.4 | HHHHHHHHHHHHHHHHHHHHHHHHHHHHHCCCCCCC |
| 713 | EEERKKQLDQYNNEWEEDEEYQRKGRGKGHQP | -50.05 | 48.4 | HHHHHHHHHHHHHHHHHHHHHHHHHHHHHCCCCCCC |
| 583 | EEERKKQLDQYNNEYEDEEYQKGGKGGKHS   | -50.05 | 48.4 | HHHHHHHHHHHHHHHHHHHHHHHHHHHHHCCCCCCC |
| 058 | EEERRKQLDQKNNEEEDQRYQKGGKGGHNP   | -50.05 | 45.2 | HHHHHHHHHHHHHHHHHHHHHHHHHHHHHCCCCCCC |
| 596 | EEERRKQLDQQSNEEEDSRYYQKGGKGGKHSN | -50.05 | 41.9 | HHHHHHHHHHHHHHHHHHHHHHHHHHHHHCCCCCCC |
| 366 | EEERRKQLDQYNNEEEDKRYQREGKGGKGNH  | -50.05 | 45.2 | HHHHHHHHHHHHHHHHHHHHHHHHHHHHHCCCCCCC |
| 510 | EEERRKQLDQYNNEYEDEEYQRKGRGKGHQP  | -50.05 | 45.2 | HHHHHHHHHHHHHHHHHHHHHHHHHHHHHCCCCCCC |
| 740 | EEEEERKNQDQKNEEEDQRYQREGKGGKGHQP | -50.00 | 38.7 | HHHHHHHHHHHHHHHHHHHHHHHHHHHHHCCCCCCC |
| 867 | DEERKKQEDQRRNEKEDKRYQREGKGGKGNH  | -49.99 | 38.7 | CHHHHHHHHHHHHHHHHHHHHHHHHHHHHCCCCCCC |
| 386 | EEEEKQRDQRSNEQEDQRYQRYGRGKGHQP   | -49.99 | 41.9 | CHHHHHHHHHHHHHHHHHHHHHHHHHHHHCCCCCCC |
| 266 | EEEEERKQQDQRKNEKEDEEYQRRGKGGKHS  | -49.99 | 38.7 | HHHHHHHHHHHHHHHHHHHHHHHHHHHHHCCCCCCC |
| 255 | EEEEERKQQDQRKNEKEDEEYQRRGRGKGHQP | -49.99 | 38.7 | HHHHHHHHHHHHHHHHHHHHHHHHHHHHHCCCCCCC |
| 400 | EEEEERKQQDQRNNEADKRYQKGGKGGHNP   | -49.99 | 45.2 | HHHHHHHHHHHHHHHHHHHHHHHHHHHHHCCCCCCC |
| 038 | EEEQKKQEDQRKNEKEDKRYQRYGKGGHNP   | -49.99 | 41.9 | HHHHHHHHHHHHHHHHHHHHHHHHHHHHHCCCCCCC |
| 110 | EEEQRKQMDQMKNEKEDEEYQRRGRGKGHQP  | -49.94 | 38.7 | HHHHHHHHHHHHHHHHHHHHHHHHHHHHHCCCCCCC |
| 494 | EEEQRKQQDQFNHEFEDQYQKGGKGGKHS    | -49.94 | 48.4 | HHHHHHHHHHHHHHHHHHHHHHHHHHHHHCCCCCCC |
| 898 | EQEERKQRDQYNNDDRRYQREGKGGKGNH    | -49.93 | 35.5 | HHHHHHHHHHHHHHHHHHHHHHHHHHHHHCCCCCCC |
| 406 | EEEQRKQQDQRNNEEEDKRYQRYGKGGKHS   | -49.92 | 41.9 | HHHHHHHHHHHHHHHHHHHHHHHHHHHHHCCCCCCC |
| 206 | EEEQRKQQDQRNNEQEDQRYQRYGRGKGHQP  | -49.92 | 41.9 | HHHHHHHHHHHHHHHHHHHHHHHHHHHHHCCCCCCC |
| 884 | EEEEKKNRDQYNNEYEDEEYQRKGRGKGNP   | -49.88 | 45.2 | HHHHHHHHHHHHHHHHHHHHHHHHHHHHHCCCCCCC |
| 370 | EEEQRKNEEDQFRNEFEDQYQKGGKGGKHS   | -49.88 | 45.2 | HHHHHHHHHHHHHHHHHHHHHHHHHHHHHCCCCCCC |
| 458 | EEEEKKRDRKYNNEWEEDEEYQRKGRGKGHQP | -49.88 | 48.4 | CHHHHHHHHHHHHHHHHHHHHHHHHHHHHCCCCCCC |
| 839 | EEEEERKQEDDKRNEEEDKRYQRYGRGKGHQP | -49.88 | 41.9 | HHHHHHHHHHHHHHHHHHHHHHHHHHHHHCCCCCCC |
| 762 | EEEEERKQDKFNNEFEDKRYQKGGKGGKHS   | -49.88 | 51.6 | HHHHHHHHHHHHHHHHHHHHHHHHHHHHHCCCCCCC |
| 333 | EEEEERKQDKYNNEYEDEEYQRKGRGKGHQP  | -49.88 | 45.2 | HHHHHHHHHHHHHHHHHHHHHHHHHHHHHCCCCCCC |
| 771 | DEERKKQEDQYRNESEDQRYQRYGRGKGHQP  | -49.86 | 38.7 | HHHHHHHHHHHHHHHHHHHHHHHHHHHHHCCCCCCC |

|     |                                   |        |      |                                     |
|-----|-----------------------------------|--------|------|-------------------------------------|
| 907 | EEEAKQRDQYNNEYEDEEYQQRGKGHQS      | -49.86 | 48.4 | HHHHHHHHHHHHHHHHHHHHHHHHHHHHHHCCCCC |
| 750 | EEEARKQLDQWKNFEDDKYQKEGQKGHQP     | -49.86 | 45.2 | HHHHHHHHHHHHHHHHHHHHHHHHHHHHHHCCCCC |
| 979 | EEEEKKQRDQKNNEEEDERYQKQGRGKGHQP   | -49.86 | 45.2 | HHHHHHHHHHHHHHHHHHHHHHHHHHHHHHCCCCC |
| 062 | EEEEERKQDQKNEEEDSRYYQEGKKGKHS     | -49.86 | 38.7 | HHHHHHHHHHHHHHHHHHHHHHHHHHHHHHCCCCC |
| 032 | EEEEERKQRDQFNNEKEDERYQKQGGKGHQS   | -49.86 | 45.2 | HHHHHHHHHHHHHHHHHHHHHHHHHHHHHHCCCCC |
| 591 | EEEEERKQRDQYNNEAEDQRYQREGRKGKGHQP | -49.86 | 45.2 | HHHHHHHHHHHHHHHHHHHHHHHHHHHHHHCCCCC |
| 976 | EEEEERKQRDQYNNESEDKRYQRYGWGKGHNP  | -49.86 | 41.9 | HHHHHHHHHHHCHHHHHHHHHHHCCCCCCCC     |
| 913 | EEEKRRQLDQWKNFEDDKSYQREGKKGKGNH   | -49.86 | 41.9 | HHHHHHHHHHHHHHHHHHHHHHHHHHHHHHCCCCC |
| 760 | EDEQRKQDQYNNAEDEFYQKQGGKGHQS      | -49.86 | 38.7 | CHHHHHHHHHHHHHHHHHHHHHHHHHHHHHCCCCC |
| 170 | EEEEERKQDQRNNEKEHKRYQRYGRGCGKQN   | -49.84 | 32.3 | HHHHHHHHHHHHHHHHHHHHHHHHHHHHHHCCCCC |
| 423 | EEEEERKQRDQFNNEFEDQYYQKGGKGHSH    | -49.82 | 45.2 | HHHHHHHHHHHHHHHHHHHHHHHHHHHHHHCCCCC |
| 460 | EEEQRKQEDQYRNEHEDEFYQKQGGKGHQP    | -49.79 | 38.7 | HHHHHHHHHHHHHHHHHHHHHHHHHHHHHHCCCCC |
| 610 | EEEQRKQDQDRNNEKEDQYQRYSGKKGKHS    | -49.79 | 45.2 | HHHHHHHHHHHHHHHHHHHHHHHHHHHHHHCCCCC |
| 781 | EQEERKQRDKYNQEYEDEEYQKGRGKGNQN    | -49.76 | 41.9 | HHHHHHHHHHHHHHHHHHHHHHHHHHHHHHCCCCC |
| 078 | EEEQRKNEEDQRNNEKEDQYQKGGKKGKHS    | -49.76 | 41.9 | HHHHHHHHHHHHHHHHHHHHHHHHHHHHHHCCCCC |
| 222 | EQEQRKQEQKYSQYEYDEKEYQQRGKGHQP    | -49.71 | 35.5 | HHHHHHHHHHHHHHHHHHHHHHHHHHHHHHCCCCC |
| 900 | EEEEERKIQDQKNEKEDEEYQRRGRGKGHQP   | -49.71 | 38.7 | CHHHHHHHHHHHHHHHHHHHHHHHHHHHHHCCCCC |
| 463 | EEEEERKSRDKFNQEFEDKYQKEGQKGHSH    | -49.71 | 48.4 | CHHHHHHHHHHHHHHHHHHHHHHHHHHHHHCCCCC |
| 937 | EEEQKKQDQKNNNEDEFYQKQGGKKGKGNH    | -49.70 | 41.9 | HHHHHHHHHHHHHHHHHHHHHHHHHHHHHHCCCCC |
| 702 | EEEQRKQDQYNQEWEDKRYQREGRKGKGHQP   | -49.68 | 41.9 | HHHHHHHHHHHHHHHHHHHHHHHHHHHHHHCCCCC |
| 153 | EEEQRKQDQYSNEFEDQYYQKGGKGHQS      | -49.66 | 38.7 | HHHHHHHHHHHHHHHHHHHHHHHHHHHHHHCCCCC |
| 890 | EEEEKKRDKYNNEWEDEYQKQGGKGHQH      | -49.64 | 48.4 | CHHHHHHHHHHHHHHHHHHHHHHHHHHHHHCCCCC |
| 313 | EEEEEKQDQRNNDKEHQYKQYGGSGKQN      | -49.62 | 32.3 | CHHHHHHHHHHHHHHHHHHHHHHHHHHHHHCCCCC |
| 489 | EEEAKFRDMFNRFEDQYYQKGGKGHQP       | -49.61 | 51.6 | HHHHHHHHHHHHHHHHHHHHHHHHHHHHHHCCCCC |
| 143 | EEERRKQLDQWKNNEDEFYQKQGGKKGKGNH   | -49.61 | 41.9 | HHHHHHHHHHHHHHHHHHHHHHHHHHHHHHCCCCC |
| 164 | EEEQRKQDQDRNNDKEDRRYQREGKKGKGNH   | -49.58 | 38.7 | HHHHHHHHHHHCHHHHHHHHHHHCCCCCCCC     |
| 667 | EEEEERKQRDQFNRFEDFYQKGRGKGHQP     | -49.52 | 45.2 | HHHHHHHHHHHHHHHHHHHHHHHHHHHHHHCCCCC |
| 125 | EEEQRKQEDDKRRNEKEDRRYQREGRKGKGHQP | -49.47 | 41.9 | HHHHHHHHHHHHHHHHHHHHHHHHHHHHHHCCCCC |
| 777 | EEEQRKQDQYNNDWEDKRYQREGRKGKGHQP   | -49.45 | 38.7 | HHHHHHHHHHHCHHHHHHHHHHHCCCCCCCC     |
| 000 | EEERRKQLDQFKNEYEDQSYQREGRKGKGHQP  | -49.44 | 45.2 | HHHHHHHHHHHHHHHHHHHHHHHHHHHHHHCCCCC |
| 613 | EEERRKQLDQWKNFEDDKYQKQGGKGHQP     | -49.44 | 41.9 | HHHHHHHHHHHHHHHHHHHHHHHHHHHHHHCCCCC |
| 733 | EQEERRKQLDQMKNEDEEYQRRGRGKGHQP    | -49.44 | 38.7 | HHHHHHHHHHHHHHHHHHHHHHHHHHHHHHCCCCC |
| 674 | EEEQKKQEQKYNNESEDKRYQRYGWGKGHNP   | -49.42 | 45.2 | HHHHHHHHHHHHHHHHHHHHHHHHHHHHHHCCCCC |
| 939 | EEEQKKQEQKYSNEYDEKEYQRNGRGKGHQY   | -49.42 | 41.9 | HHHHHHHHHHHHHHHHHHHHHHHHHHHHHHCCCCC |
| 216 | EQEQRKQEEKRNNEKEDKRYQREGRKGKGHQP  | -49.42 | 38.7 | HHHHHHHHHHHHHHHHHHHHHHHHHHHHHHCCCCC |
| 331 | EEEEERKQRDKYNNESEDRYQRYGRGKGHQP   | -49.41 | 45.2 | HHHHHHHHHHHCHHHHHHHHHHHCCCCCCCC     |
| 050 | EEEQKKQDQYNNEEDDKYQREGHGKGHQR     | -49.38 | 48.4 | HHHHHHHHHHHCHHHHHHHHHHHCCCCCCCC     |
| 699 | EEEQKKQRDQYNNESEDQRYQRYGRGKGHQP   | -49.38 | 45.2 | HHHHHHHHHHHCCCCHHHHHHHHHHCCCCCCCC   |
| 735 | EEEQKKQRDQYNNEDEEYQRYQREGRKGKGHQP | -49.38 | 45.2 | HHHHHHHHHHHHHHHHHHHHHHHHHHHHHHCCCCC |
| 045 | EEEQRKQDQKNEEEDKRYQEGKKGKGNH      | -49.38 | 41.9 | HHHHHHHHHHHHHHHHHHHHHHHHHHHHHHCCCCC |
| 177 | EEEQRKQDQYNNESEDERYQKGGKKGKGNH    | -49.38 | 41.9 | HHHHHHHHHHHCCCCHHHHHHHHHHCCCCCCCC   |
| 705 | EEEQRKQDQYNNESEDERYQKGGKKGKGHYP   | -49.38 | 41.9 | HHHHHHHHHHHCCCCHHHHHHHHHHCCCCCCCC   |
| 572 | EEEQRKQDQYNNESEDQRYQRYGRGKGHQP    | -49.38 | 41.9 | HHHHHHHHHHHCCCCHHHHHHHHHHCCCCCCCC   |
| 549 | EEEQRKQDQYNNEWEDKRYQREGKKGKGHSS   | -49.38 | 41.9 | HHHHHHHHHHHHHHHHHHHHHHHHHHHHHHCCCCC |
| 511 | EEEEKKQDQWKNNEDEFYQKQGGKKGKGNH    | -49.37 | 35.5 | HHHHHHHHHHHHHHHHHHHHHHHHHHHHHHCCCCC |
| 800 | DEERKQEDQQRNNDKEHKRYQREGKQGKGNH   | -49.36 | 29.0 | CHHHHHHHHHHHHHHHHHHHHHHHHHHHHHCCCCC |
| 935 | EEEEKKRDKWKNRWEDEYQKQGGKKGKGNH    | -49.33 | 38.7 | HHHHHHHHHHHHHHHHHHHHHHHHHHHHHHCCCCC |
| 687 | EEEEERKYQDKYNQESDKRYQRYGWGKGHNP   | -49.30 | 45.2 | CHHHHHHHHHHHHHHHHHHHHHHHHHHHHHCCCCC |
| 529 | EEEEERKQDQYKNEYEDEEYQKGRGKGHQP    | -49.30 | 38.7 | HHHHHHHHHHHHHHHHHHHHHHHHHHHHHHCCCCC |
| 844 | EEEEERKQRDQYNNEAEDQRYQREGWGKGHYP  | -49.30 | 45.2 | HHHHHHHHHHHHHHHHHHHHHHHHHHHHHHCCCCC |
| 107 | EQERRKQLEKWKNEWEDKYQKQGGKGHQP     | -49.29 | 38.7 | HHHHHHHHHHHHHHHHHHHHHHHHHHHHHHCCCCC |
| 540 | EEEQKKQDQYNNEYEDEEYQKGRGKGNQN     | -49.24 | 45.2 | HHHHHHHHHHHHHHHHHHHHHHHHHHHHHHCCCCC |
| 001 | EEEEERKQDQYNNESEDQRFQKEGKKGKGSN   | -49.23 | 38.7 | HHHHHHHHHHHCCCCHHHHHHHHHHCCCCCCCC   |
| 084 | EEEEKKRDKYNQESSEDERYQKGGKKGKGNP   | -49.23 | 45.2 | CHHHHHHHHHHHHHHHHHHHHHHHHHHHHHCCCCC |
| 573 | EEEEKKQLDQWKQEYEDQYQRYNGSGKGHQY   | -49.23 | 41.9 | CHHHHHHHHHHHHHHHHHHHHHHHHHHHHHCCCCC |
| 067 | EEEEERKQDQYNQEYEDQYQRYNGSGKGHQY   | -49.23 | 41.9 | HHHHHHHHHHHHHHHHHHHHHHHHHHHHHHCCCCC |
| 891 | EEEEEKQREKRSNEKEDEEYQRRGRGKGHQP   | -49.22 | 41.9 | CHHHHHHHHHHHHHHHHHHHHHHHHHHHHHCCCCC |
| 214 | EEEEKMLDMKNNREDEERYQKGGKKGKGNP    | -49.22 | 45.2 | HHHHHHHHHHHHHHHHHHHHHHHHHHHHHHCCCCC |
| 498 | EEEKRLDMYKNRYEDQYQRYGRGKGHQP      | -49.22 | 38.7 | HHHHHHHHHHHHHHHHHHHHHHHHHHHHHHCCCCC |
| 473 | EEERRKQLDMINNRQEDQRYQREGKKGKHS    | -49.20 | 41.9 | HHHHHHHHHHHHHHHHHHHHHHHHHHHHHHCCCCC |
| 623 | EQEQRKQEQKYSNEYDEEYQKGRGKGHSN     | -49.18 | 35.5 | HHHHHHHHHHHHHHHHHHHHHHHHHHHHHHCCCCC |
| 451 | EEEMRKLQDQINNEEDEFYQKGGKKGKGHYP   | -49.17 | 41.9 | HHHHHHHHHHHHHHHHHHHHHHHHHHHHHHCCCCC |
| 592 | EDEQRKQDQRSNRKEDEEYQKRWGKGHYP     | -49.15 | 32.3 | CHHHHHHHHHHHHHHHHHHHHHHHHHHHHHCCCCC |
| 325 | EEEKRRQLEKYNNESEDKRYQYQGGKGHQS    | -49.10 | 45.2 | HHHHHHHHHHHHHHHHHHHHHHHHHHHHHHCCCCC |
| 480 | EEEQRKHEDKNRHEDEKRYQREGKKGKHS     | -49.08 | 45.2 | HHHHHHHHHHHHHHHHHHHHHHHHHHHHHHCCCCC |
| 204 | EQQRKQEQKYSNEYEQKQYKEGRGKGHQP     | -49.06 | 32.3 | HHHHHHHHHHHHHHHHHHHHHHHHHHHHHHCCCCC |
| 034 | EEEEKQYDQYNNDYEDEEYQKGRGKGHQP     | -49.06 | 41.9 | CHHHHHHHHHHHHCCCCHHHHHHHHHHCCCCCCCC |

|     |                                  |        |      |                                  |
|-----|----------------------------------|--------|------|----------------------------------|
| 231 | EEEEERKNRDKYNNEAEDKRYQREGKKGHSS  | -49.05 | 48.4 | HHHHHHHHHHCHHHHHHHHHHHCCCCCCCC   |
| 502 | EEEEERKKQDQYNNEYEDDEFQRKGRGKGQN  | -49.04 | 38.7 | HHHHHHHHHHHHHHHHHHHHHHHHCCCCCCCC |
| 068 | EEEQRKQQDAYNNRAEDERYQRYGRGKGHP   | -49.03 | 41.9 | HHHHHHHHHHHHHHHHHHHHHHHHCCCCCCCC |
| 320 | EQERRKQOEKYSNESEDKRYQRYGKGKHNS   | -49.02 | 35.5 | HHHHHHHHHHHHHHHHHHHHHHHHCCCCCCCC |
| 069 | EEEKRKWLKLNNEKEDKRYQREGQKGKQS    | -49.01 | 45.2 | HHHHHHHHHHHHHHHHHHHHHHHHCCCCCCCC |
| 599 | EEEEERKYQDKNNEEDKRYQRYGKGKGHSS   | -49.00 | 45.2 | CHHHHHHHHHHHHHHHHHHHHHHHCCCCCCCC |
| 175 | EEEEERKYQDKYKNEWEDKRYQEEGKGKGHNH | -49.00 | 41.9 | CHHHHHHHHHHHHHHHHHHHHHHHCCCCCCCC |
| 426 | EEEEERKKQDQRNNDSEHRRKQKEGWGSGKYP | -48.99 | 29.0 | HHHHHHHHHHHHHHHHHHHHHHHHCCCCCCCC |
| 281 | EEEQRKQQDQYNNEWHEEERKQRKGRGSGKQN | -48.98 | 32.3 | HHHHHHHHHHHHHHHHHHHHHHHHCCCCCCCC |
| 799 | EEEEERKKQDQYNNEAEDQRYQREGKKGKHNS | -48.98 | 45.2 | HHHHHHHHHHHHHHHHHHHHHHHHCCCCCCCC |
| 395 | EEEEERKKQDQYNNRYEDEEYQRKGRGKGHP  | -48.96 | 38.7 | HHHHHHHHHHHHHHHHHHHHHHHHCCCCCCCC |
| 420 | EEEARKNQQDQYNQSEDEEYRQQGKKGKDSR  | -48.94 | 51.6 | HHHHHHHHHHHHHHHHHHHHHHHHCCCCCCCC |
| 369 | EEEQRKQQDQYNNEAEDQRYQREGKKGKDSR  | -48.94 | 51.6 | HHHHHHHHHHHHHHHHHHHHHHHHCCCCCCCC |
| 345 | EEEEERKKQKNNNEEDKRFQRYGKGKGNR    | -48.93 | 41.9 | HHHHHHHHHHHHHHHHHHHHHHHHCCCCCCCC |
| 653 | EEEEKKKRDQYNNEWEDQRYQREGWKGHNH   | -48.93 | 45.2 | CHHHHHHHHHHHHHHHHHHHHHHHCCCCCCCC |
| 753 | EEEEKKKRQDQYNNEYEDDEEYQRKGRGKGHP | -48.93 | 45.2 | CHHHHHHHHHHHHHHHHHHHHHHHCCCCCCCC |
| 348 | EEEEKKKRQDQYNNEYEDQRYQRKGRGKGHP  | -48.93 | 45.2 | CHHHHHHHHHHHHHHHHHHHHHHHCCCCCCCC |
| 636 | EEEEERKKEDQWRNEEDKRYQREGRGKGHP   | -48.93 | 38.7 | HHHHHHHHHHHHCHHHHHHHHHHHCCCCCCCC |
| 845 | EEEEERKKQDQYNNESEDQRYQGGWKGHNH   | -48.93 | 41.9 | HHHHHHHHHHHSCCHHHHHHHHHCCCCCCCC  |
| 588 | EEEEERKKQDQYNNESEDQRYQRYGWGKGYH  | -48.93 | 41.9 | HHHHHHHHHHHSCCHHHHHHHHHCCCCCCCC  |
| 565 | EEEEERKKQDQYNNESEDSRYQQGKGKGNH   | -48.93 | 41.9 | HHHHHHHHHHHSCCHHHHHHHHHCCCCCCCC  |
| 166 | EEEEERKKQDQYNNEWEDQRYQREGWKGHP   | -48.93 | 41.9 | HHHHHHHHHHHHHHHHHHHHHHHHCCCCCCCC |
| 305 | EEEEERKKQDQYSNEYEDEEYQRKGRGKGHP  | -48.93 | 38.7 | HHHHHHHHHHHHHHHHHHHHHHHHCCCCCCCC |
| 156 | QEEEEKKQDQYNNEHEDERYQRQGWGKGYH   | -48.93 | 41.9 | CHHHHHHHHHHHHHHHHHHHHHHHCCCCCCCC |
| 822 | EEEKRKQEDQRNNEEDQYQKKGKGNQ       | -48.92 | 41.9 | HHHHHHHHHHHHHHHHHHHHHHHHCCCCCCCC |
| 543 | EEEKRKLLDQIENEREDQYQKQGGKKGHP    | -48.91 | 41.9 | HHHHHHHHHHHHHHHHHHHHHHHHCCCCCCCC |
| 049 | EEEQRKQEQRKRNNEEKDKYQRSRGKKGHP   | -48.91 | 41.9 | HHHHHHHHHHHHHHHHHHHHHHHHCCCCCCCC |
| 104 | EEEQRKFEDKRNNEEDKRYQQGGRGKGHP    | -48.90 | 48.4 | CHHHHHHHHHHHHHHHHHHHHHHHCCCCCCCC |
| 459 | EEEEKKQRDQYNNEYEHQEKQRKGRGSGKSN  | -48.86 | 35.5 | HHHHHHHHHHHHHHHHHHHHHHHHCCCCCCCC |
| 165 | EEEEERKQRDQYNNEAEDQRYQREGKKGKHNS | -48.85 | 45.2 | HHHHHHHHHHHHHHHHHHHHHHHHCCCCCCCC |
| 536 | EEEEERKKQDQYNNRYEHEEKQKEGRGCGQN  | -48.85 | 29.0 | HHHHHHHHHHHHHHHHHHHHHHHHCCCCCCCC |
| 385 | EQEERKQEQRSQEKEDKRFQKQRGKKGQN    | -48.82 | 29.0 | HHHHHHHHHHHHHHHHHHHHHHHHCCCCCCCC |
| 183 | EEEARKSQDKQNNEREDKRFQREGKKGKGNH  | -48.78 | 45.2 | HHHHHHHHHHHHHHHHHHHHHHHHCCCCCCCC |
| 264 | EEEQRKQQKYNNEYEDEEYQRKGRGKGHP    | -48.78 | 41.9 | HHHHHHHHHHHHHHHHHHHHHHHHCCCCCCCC |
| 712 | EEEQRKQQQKYSNEWEDDEEYQRKGRGKGHP  | -48.78 | 38.7 | HHHHHHHHHHHHHHHHHHHHHHHHCCCCCCCC |
| 933 | EEEEERKKQKRSNEQEDKRYQREGRGKGHP   | -48.78 | 38.7 | HHHHHHHHHHHHHHHHHHHHHHHHCCCCCCCC |
| 041 | DEERKKWEDKRNNEEDKRYQRYGKGKGHSH   | -48.78 | 41.9 | CHHHHHHHHHHHHHHHHHHHHHHHCCCCCCCC |
| 047 | DEEQKKYEDKRNNEEDKSYQRHGKKGHSH    | -48.77 | 48.4 | CHHHHHHHHHHHHHHHHHHHHHHHCCCCCCCC |
| 436 | EEEQRKLLDQINNNEEDDRYQREGRGKGHP   | -48.76 | 45.2 | HHHHHHHHHHHHHHHHHHHHHHHHCCCCCCCC |
| 028 | EEQRRKQLDMINNRAEDQRYQRYGRGKGHP   | -48.76 | 48.4 | HHHHHHHHHHHHHHHHHHHHHHHHCCCCCCCC |
| 598 | EEEEERKLQDKKNEAEDQRYQREGRGKGHP   | -48.75 | 41.9 | CHHHHHHHHHHHHHHHHHHHHHHHCCCCCCCC |
| 519 | EEEKRKLLDQINNEQEDQRYQREGKKGKHNS  | -48.75 | 45.2 | HHHHHHHHHHHHHHHHHHHHHHHHCCCCCCCC |
| 557 | EEEQRKLEDQKNEQEDQRYQRYGRGKGHP    | -48.75 | 38.7 | HHHHHHHHHHHHHHHHHHHHHHHHCCCCCCCC |
| 225 | EEEQRKLEDQKSNEKEDEEYQRRGKGKHNS   | -48.75 | 38.7 | HHHHHHHHHHHHHHHHHHHHHHHHCCCCCCCC |
| 757 | EEEQRKLYDQINNEKEDEEYQRYGWGKHNS   | -48.75 | 41.9 | HHHHHHHHHHHHHHHHHHHHHHHHCCCCCCCC |
| 244 | EEEQRKQEEQRSQRKEDERYQREGQKGKQS   | -48.75 | 32.3 | HHHHHHHHHHHHHHHHHHHHHHHHCCCCCCCC |
| 738 | EEEEERKKQDQNNEREDEEYQRKGRGKHNS   | -48.74 | 41.9 | HHHHHHHHHHHHHHHHHHHHHHHHCCCCCCCC |
| 455 | EEEEERKKQDQYNNEAEDQRYQREGKKGHNS  | -48.73 | 45.2 | HHHHHHHHHHHHHHHHHHHHHHHHCCCCCCCC |
| 322 | EEEEKKKRQDQNNEREDEEYQRRGRGKGHP   | -48.72 | 45.2 | CHHHHHHHHHHHHHHHHHHHHHHHCCCCCCCC |
| 746 | EEEEERKKQEKQSNEREDEEYQRKGRGKGHP  | -48.72 | 38.7 | HHHHHHHHHHHHHHHHHHHHHHHHCCCCCCCC |
| 848 | EEERKKQEERKNNEEDKRYQREGKKGKHNS   | -48.69 | 41.9 | HHHHHHHHHHHHHHHHHHHHHHHHCCCCCCCC |
| 938 | DEERKSEDDQYNNEAEDERYQGGKKGKHNS   | -48.69 | 45.2 | CHHHHHHHHHHHHHHHHHHHHHHHCCCCCCCC |
| 274 | EEERKKQLEKYNNESEDKRYQRYGRGKGHP   | -48.68 | 48.4 | HHHHHHHHHHHHHHHHHHHHHHHHCCCCCCCC |
| 742 | EEEEERKKQDKYKNEYEDKEYQRKGRGKGHP  | -48.65 | 41.9 | HHHHHHHHHHHHHHHHHHHHHHHHCCCCCCCC |
| 555 | EEEEERKQRKYNNEWEDKRYQREGRGKGHP   | -48.65 | 41.9 | CHHHHHHHHHHHHHHHHHHHHHHHCCCCCCCC |
| 696 | EEERRKQLQKYKNEYEDEEYQRKGRGKGHP   | -48.65 | 41.9 | HHHHHHHHHHHHHHHHHHHHHHHHCCCCCCCC |
| 970 | EEERRKQLQKYNNESEDKRYQRYGRGKGHP   | -48.65 | 45.2 | HHHHHHHHHHHHHHHHHHHHHHHHCCCCCCCC |
| 745 | EEEEERKKQKYSNEYEDEEYQRKGRGKGHP   | -48.65 | 38.7 | HHHHHHHHHHHHHHHHHHHHHHHHCCCCCCCC |
| 975 | EQEERKKQDKIRHEEEDKRYQGGKKGHNS    | -48.63 | 41.9 | HHHHHHHHHHHHHHHHHHHHHHHHCCCCCCCC |
| 478 | EEEQRKQQQYSNDAEDKRYQRRGRGKGHP    | -48.61 | 35.5 | HHHHHHHHHHHHHHHHHHHHHHHHCCCCCCCC |
| 945 | EQEQRKQEKYNNEYEDKRYQKEGKKGHNS    | -48.61 | 38.7 | HHHHHHHHHHHHHHHHHHHHHHHHCCCCCCCC |
| 184 | EEEEKKKRDQFNDFDRYQGGQKGKQS       | -48.61 | 45.2 | CHHHHHHHHHHHHHHHHHHHHHHHCCCCCCCC |
| 988 | EEEEERKKQDQNNDEEDRRYQRYGWGKGYH   | -48.61 | 38.7 | HHHHHHHHHHHHCHHHHHHHHHHHCCCCCCCC |
| 011 | EEQQKKQQDQRSNEKEHEEYQRRGQGGHNS   | -48.59 | 38.7 | HHHHHHHHHHHHHHHHHHHHHHHHCCCCCCCC |
| 656 | EEEEERKYQDYKQEWEDKRYQREGKKGKHNS  | -48.59 | 38.7 | CHHHHHHHHHHHHHHHHHHHHHHHCCCCCCCC |
| 969 | EEEQRKYEDQRNKEKEDERYQGGWKGKHNS   | -48.59 | 41.9 | CHHHHHHHHHHHHHHHHHHHHHHHCCCCCCCC |
| 303 | EEERKKQLEQYQEWEDQRYQREGQKGKQS    | -48.58 | 41.9 | HHHHHHHHHHHHHHHHHHHHHHHHCCCCCCCC |

|     |                                      |        |      |                                      |
|-----|--------------------------------------|--------|------|--------------------------------------|
| 607 | EEEEERKMRDQYNNDDWEDQRYQREGKGKGNH     | -48.57 | 38.7 | HHHHHHHHHHHHHHCHHHHHHHHHHHCCCCCCCC   |
| 353 | EEEEERKKQDQYNNEYEDEEYQRKGRGKGHQP     | -48.53 | 41.9 | HHHHHHHHHHHHHHHHHHHHHHHHHHHHCCCCCCCC |
| 734 | EEEEERKKQDQYNNEYEDQEQYQRNGRKGKGHQP   | -48.53 | 41.9 | HHHHHHHHHHHHHHHHHHHHHHHHHHHHCCCCCCCC |
| 951 | EEEEKKKREKFSNEFEDKYQQKGQKGGKHQ       | -48.53 | 45.2 | CHHHHHHHHHHHHHHHHHHHHHHHHHHHCCCCCCCC |
| 245 | EEQRRKQLDKINNEAEDKRYQREGKGGKSHS      | -48.52 | 54.8 | HHHHHHHHHHHHHHHHHHHHHHHHHHHHCCCCCCCC |
| 020 | EEEEERYQDQYNNEYEDQYFQKKGQKGGKGNH     | -48.52 | 38.7 | CHHHHHHHHHHHHHHHHHHHHHHHHHHHCCCCCCCC |
| 339 | EEEQRKQEQKRRNEKEDKRYQRYGRGKGHQP      | -48.52 | 38.7 | HHHHHHHHHHHHHHHHHHHHHHHHHHHHCCCCCCCC |
| 603 | EEEKKKLLDQINNEAEDKRYQRYGQGKGGHQS     | -48.52 | 51.6 | HHHHHHHHHHHHHHHHHHHHHHHHHHHHCCCCCCCC |
| 770 | EQEERKKQDQYNQEQYEDEEYQRKGRGKGHQP     | -48.51 | 38.7 | HHHHHHHHHHHHHHHHHHHHHHHHHHHHCCCCCCCC |
| 991 | DEERKMLDKKNNEEEDERYQQQGRGKGGHQP      | -48.51 | 48.4 | HHHHHHHHHHHHHHHHHHHHHHHHHHHHCCCCCCCC |
| 652 | EEERKKQLDQWKNYEDQSYQREGRGKGNQN       | -48.51 | 41.9 | HHHHHHHHHHHHHHHHHHHHHHHHHHHHCCCCCCCC |
| 318 | EEEQKKQEEQYRNDYEDREYQRKGRGKGNHNP     | -48.49 | 35.5 | HHHHHHHHHHHHHHHHHHHHHHHHHHHHCCCCCCCC |
| 139 | EEEEERKQEQRSNDQEDRRYQKEGRGKGGHQP     | -48.49 | 32.3 | HHHHHHHHHHHHHHHHHHHHHHHHHHHHCCCCCCCC |
| 434 | EEEQRKQEEQRRNDQEDRRYQQYGRGKGGHQP     | -48.49 | 32.3 | HHHHHHHHHHHHHHHHHHHHHHHHHHHHCCCCCCCC |
| 522 | EQEERKQEQRSNRQEDERYQREGRGKGGHQP      | -48.49 | 29.0 | HHHHHHHHHHHHHHHHHHHHHHHHHHHHCCCCCCCC |
| 584 | EEERRKQLDKIKNEQEDKSYQRYGQGKGGHQS     | -48.48 | 45.2 | HHHHHHHHHHHHHHHHHHHHHHHHHHHHCCCCCCCC |
| 691 | EEERRKQLDKKNNEEEDKRYQQQGRGKGGHQP     | -48.48 | 48.4 | HHHHHHHHHHHHHHHHHHHHHHHHHHHHCCCCCCCC |
| 301 | EEERKKQDKYNNESEDRRYQRYGRGKGGHQP      | -48.48 | 45.2 | HHHHHHHHHHHHCCHHHHHHHHHHHCCCCCCCC    |
| 561 | EEEQKKQDKYSNEYEQRYQYQKEGQGGKGGHSS    | -48.47 | 38.7 | HHHHHHHHHHHHHHHHHHHHHHHHHHHHCCCCCCCC |
| 774 | EEEQKKQRDKFNNEFEQYQQKGQGGKGGHSH      | -48.47 | 45.2 | HHHHHHHHHHHHHHHHHHHHHHHHHHHHCCCCCCCC |
| 521 | EEEQKKQRDKYNNEWEQRYQREGKGGKGGHSH     | -48.47 | 41.9 | HHHHHHHHHHHHHHHHHHHHHHHHHHHHCCCCCCCC |
| 689 | EEEQRKQDKFNNEKEQRYQQQGRGQGGHQP       | -48.47 | 41.9 | HHHHHHHHHHHHHHHHHHHHHHHHHHHHCCCCCCCC |
| 875 | EEEQRKQDKYSNEYEQYQYQKEGRGQGGHQP      | -48.47 | 35.5 | HHHHHHHHHHHHHHHHHHHHHHHHHHHHCCCCCCCC |
| 737 | EEEEERYQDQYNNEYEHHEEYQRKGRGKGGHQP    | -48.45 | 35.5 | CHHHHHHHHHHHHHHHHHHHHHHHHHHHCCCCCCCC |
| 874 | EQEERKKQDQYNNRWEDEEYQRKGRGKGGHQP     | -48.45 | 35.5 | HHHHHHHHHHHHHHCHHHHHHHHHHHCCCCCCCC   |
| 747 | EEEQRKRQDQYNNDWEEDEYQRKGRGKGGHNP     | -48.44 | 38.7 | HHHHHHHHHHHHCCHHHHHHHHHHHCCCCCCCC    |
| 782 | EEEEERKQDQWKNFEFEDEYFQYQYQKGGKGGHSH  | -48.42 | 38.7 | CHHHHHHHHHHHHHHHHHHHHHHHHHHHCCCCCCCC |
| 075 | EQQRKQEQEYSNEYEDEEYQRKGRGKGGHNP      | -48.42 | 35.5 | HHHHHHHHHHHHHHHHHHHHHHHHHHHHCCCCCCCC |
| 405 | EEEQRKQEQEYSNEYEDQYQQQGGKGGKGGHSH    | -48.42 | 38.7 | HHHHHHHHHHHHHHHHHHHHHHHHHHHHCCCCCCCC |
| 432 | EEEEKKQQEQRSNEKEDEEYQRRGQGGKGGHSH    | -48.41 | 38.7 | HHHHHHHHHHHHHHHHHHHHHHHHHHHHCCCCCCCC |
| 567 | EEEEERKQEQRSNEQEDKRYQREGKGGKGGHSH    | -48.41 | 35.5 | HHHHHHHHHHHHHHHHHHHHHHHHHHHHCCCCCCCC |
| 792 | EEEEKKRQDQYNNDEHEEYQYQKGGKGGHQP      | -48.41 | 32.3 | HHHHHHHHHHHHHHCHHHHHHHHHHHCCCCCCCC   |
| 189 | EEEEKKRQDQYNNFEFEDEYQYQKGGKGGHQP     | -48.41 | 45.2 | CHHHHHHHHHHHHHHHHHHHHHHHHHHHCCCCCCCC |
| 488 | EEEEERKQRDKESNEKEDKRYQREGWGGKGGHYP   | -48.41 | 41.9 | HHHHHHHHHHHHHHHHHHHHHHHHHHHHCCCCCCCC |
| 818 | EEEEERYQDQYKNWEEDRRYQREGNGKGGHSH     | -48.39 | 38.7 | CHHHHHHHHHHHHHHHHHHHHHHHHHHHCCCCCCCC |
| 928 | EEEQKKQEQKYRNEWEDKRYQREGRGGKGGHQP    | -48.39 | 41.9 | HHHHHHHHHHHHHHHHHHHHHHHHHHHHCCCCCCCC |
| 626 | EEEQRKQDQYNNDEWEQRYQREGRGQGGHQP      | -48.35 | 32.3 | HHHHHHHHHHHHHHHHHHHHHHHHHHHHCCCCCCCC |
| 355 | EEEQRKQDQYNNDEYEQEYQQQGGKGGKGGHQP    | -48.35 | 32.3 | HHHHHHHHHHHHHHHHHHHHHHHHHHHHCCCCCCCC |
| 670 | EEEEERKKQDQFNNEFENKYYQYQKGGKGGKGGHSH | -48.34 | 41.9 | HHHHHHHHHHHHHHHHHHHHHHHHHHHHCCCCCCCC |
| 879 | EEEEERKQRDKYNNSEQKRYQRYGRGQGGHQP     | -48.34 | 38.7 | HHHHHHHHHHHHCHHHHHHHHHHHHHCCCCCCCC   |
| 862 | EEERRKQLDKWKNWEQKYQYQKGGKGGKGGHSH    | -48.34 | 38.7 | HHHHHHHHHHHHHHHHHHHHHHHHHHHHCCCCCCCC |
| 329 | EEERRKQLDKYKNEYEQKYQYQKGGKGGKGGHQP   | -48.34 | 38.7 | HHHHHHHHHHHHHHHHHHHHHHHHHHHHCCCCCCCC |
| 520 | EEEEERKMRDQYNNDEDEEYQRKGRGKGGHSH     | -48.33 | 38.7 | HHHHHHHHHHHHCCHHHHHHHHHHHCCCCCCCC    |
| 002 | EEEEERYQDQRNNDKEDREYQRRGRGKGGHQP     | -48.30 | 38.7 | CHHHHHHHHHHHHHCHHHHHHHHHHHCCCCCCCC   |
| 129 | EEEEERYQDQYNNDEEDRRYQRYGRGKGGHQP     | -48.30 | 38.7 | CHHHHHHHHHHHCCHHHHHHHHHHHCCCCCCCC    |
| 464 | EEEEERKQEQRNNRKEDEERYQRYGRGKGGHQP    | -48.29 | 35.5 | HHHHHHHHHHHHHHHHHHHHHHHHHHHHCCCCCCCC |
| 801 | EEEEKKQREQYNNESEDERYQKQGGKGGKGGHQP   | -48.29 | 41.9 | CHHHHHHHHHHHHCCHHHHHHHHHHHCCCCCCCC   |
| 954 | EEEEERKQEQEYSNEWEDERYQQQGGKGGKGGHYP  | -48.29 | 35.5 | HHHHHHHHHHHHHHHHHHHHHHHHHHHHCCCCCCCC |
| 570 | EEEEERKQEQFNNEFEDKYQQKGGKGGKGGHQP    | -48.29 | 41.9 | HHHHHHHHHHHHHHHHHHHHHHHHHHHHCCCCCCCC |
| 044 | EEERKKQLEQWKNWEDEQYQYQKGGKGGKGGHQP   | -48.29 | 41.9 | HHHHHHHHHHHHHHHHHHHHHHHHHHHHCCCCCCCC |
| 230 | EEERKKQLEQYKNEAEDKRYQQYQWGGKGGHNP    | -48.29 | 45.2 | HHHHHHHHHHHHHHHHHHHHHHHHHHHHCCCCCCCC |
| 146 | EEERKKQLEQYNNNESEDQRYQRYGRGKGGHQP    | -48.29 | 45.2 | HHHHHHHHHHHHHHHHHHHHHHHHHHHHCCCCCCCC |
| 985 | EEERRKQEEQRNEEEDQRYQRYGRGKGGHQP      | -48.29 | 35.5 | HHHHHHHHHHHHHHHHHHHHHHHHHHHHCCCCCCCC |
| 832 | EEERRKQLEQYNNNEYEDEEYQRKGRGKGGHQP    | -48.29 | 41.9 | HHHHHHHHHHHHHHHHHHHHHHHHHHHHCCCCCCCC |
| 732 | EEERRKQLEQYYSNEYEDQEQYQRVGRGKGGHQP   | -48.29 | 38.7 | HHHHHHHHHHHHHHHHHHHHHHHHHHHHCCCCCCCC |
| 780 | EQEERKQREQYNNNEAEDQRYQREGKGGKGGHSH   | -48.29 | 38.7 | HHHHHHHHHHHHHHHHHHHHHHHHHHHHCCCCCCCC |
| 417 | EEEEEKYQDQYNNSEEDQRYQRYGRGKGGHQP     | -48.28 | 45.2 | CHHHHHHHHHHHCCHHHHHHHHHHHCCCCCCCC    |
| 157 | EEEEERKQDQYKNEEEDQRYQRYGRGKGGHQP     | -48.28 | 41.9 | CHHHHHHHHHHHHHHHHHHHHHHHHHHHCCCCCCCC |
| 415 | EEEEERKQDQYKNEEEDKRYQREGRGGKGGHQP    | -48.28 | 38.7 | CHHHHHHHHHHHHHHHHHHHHHHHHHHHCCCCCCCC |
| 600 | EEEEERKQDQYKNEEEDQYQYQKGGKGGKGGHSH   | -48.28 | 38.7 | CHHHHHHHHHHHHHHHHHHHHHHHHHHHCCCCCCCC |
| 421 | EEEEERKQDQYNNSEEDKRYQKGGKGGKGGHYP    | -48.28 | 41.9 | CHHHHHHHHHHHCCHHHHHHHHHHHCCCCCCCC    |
| 698 | EEEEERKQDQYNNNEYEQEQYQRNGRGGKGGHQP   | -48.28 | 41.9 | CHHHHHHHHHHHHHHHHHHHHHHHHHHHCCCCCCCC |
| 984 | EEEQKKYEDQRNNEEEDQRYQRYGRGKGGHQP     | -48.28 | 45.2 | CHHHHHHHHHHHCHHHHHHHHHHHHHCCCCCCCC   |
| 341 | EEEQRKYEDQRNNEAEDQRYQRYGRGKGGHNP     | -48.28 | 45.2 | CHHHHHHHHHHHHHHHHHHHHHHHHHHHCCCCCCCC |
| 587 | EEEQRKYEDQRNNEEEDQRYQRYGRGKGGHQP     | -48.28 | 41.9 | CHHHHHHHHHHHHHCHHHHHHHHHHHCCCCCCCC   |
| 286 | EEEQRKYEDQRNNEEEDQRYQYQKGGKGGKGGHSS  | -48.28 | 41.9 | CHHHHHHHHHHHHHHHHHHHHHHHHHHHCCCCCCCC |
| 290 | EEEQRKYEDQRNNEEEDKRYQREGKGGKGGHSS    | -48.28 | 41.9 | CHHHHHHHHHHHHHHHHHHHHHHHHHHHCCCCCCCC |

|     |                                 |        |      |                                          |
|-----|---------------------------------|--------|------|------------------------------------------|
| 790 | EEEQRKYEDQRNNEEEDQQYQKQGRGKGHP  | -48.28 | 41.9 | CHHHHHHHHHHHHHHHHHHHHHHHHHHHHHHHHCCCCCCC |
| 027 | EEEQRKYEDQRNNEEEDQRYQREGWKGHNH  | -48.28 | 41.9 | CHHHHHHHHHHHHHHHHHHHHHHHHHHHHHHHHCCCCCCC |
| 198 | EEEQRKYEDQRNNEEEDQRYQRYGRGKGHP  | -48.28 | 41.9 | CHHHHHHHHHHHHHHHHHHHHHHHHHHHHHHHHCCCCCCC |
| 784 | KQEEEKYDQYNNWEDEEYQRKGRGKGHP    | -48.28 | 35.5 | CHHHHHHHHHHHHHHHHHHHHHHHHHHHHHHHHCCCCCCC |
| 841 | EEEEKRQDQENNDKEDDEYQRRGKGHNH    | -48.26 | 38.7 | HHHHHHHHHHHHHHHHHHHHHHHHHHHHHHHHCCCCCCC  |
| 273 | EEQARKSQDQYNNHEDEERYQQQGRGKGHP  | -48.25 | 48.4 | HHHHHHHHHHHHHHHHHHHHHHHHHHHHHHHHCCCCCCC  |
| 036 | EEERKKQLDKESNEKEDKRYQREGQKGKHS  | -48.25 | 48.4 | HHHHHHHHHHHHHHHHHHHHHHHHHHHHHHHHCCCCCCC  |
| 496 | EEEEKRFQQQYSEYEDEEYQRKGRGKGHP   | -48.25 | 38.7 | CHHHHHHHHHHHHHHHHHHHHHHHHHHHHHHHHCCCCCCC |
| 887 | EEERRKQLDKKNNEEEDKRYQQQKGKGNH   | -48.25 | 48.4 | HHHHHHHHHHHHHHHHHHHHHHHHHHHHHHHHCCCCCCC  |
| 121 | EEEQRKLYDQINNKEDEEYQRRAGRKGHP   | -48.24 | 38.7 | HHHHHHHHHHHHHHHHHHHHHHHHHHHHHHHHCCCCCCC  |
| 115 | EEEQRKQQEQRSNDAEDRQYQQRGRGKGHP  | -48.23 | 35.5 | HHHHHHHHHHHHHHHHHHHHHHHHHHHHHHHHCCCCCCC  |
| 606 | EQEERKQQEQRSNEEEDKRYQREGWKGHP   | -48.22 | 32.3 | HHHHHHHHHHHHHHHHHHHHHHHHHHHHHHHHCCCCCCC  |
| 012 | EQEERKKQEKYNQEAEDKRYQRYGRGKGHP  | -48.22 | 41.9 | HHHHHHHHHHHHHHHHHHHHHHHHHHHHHHHHCCCCCCC  |
| 477 | EEEEKREDKRYNEYEDEYQQQGGKGHP     | -48.20 | 41.9 | HHHHHHHHHHHHHHHHHHHHHHHHHHHHHHHHCCCCCCC  |
| 213 | EEEEKRQDKENNEREDKRYQREGQKGKHS   | -48.20 | 45.2 | HHHHHHHHHHHHHHHHHHHHHHHHHHHHHHHHCCCCCCC  |
| 924 | EEEEKRQDKQNNSEEDKSYQREGRKGHP    | -48.20 | 45.2 | HHHHHHHHHHHHHHHHHHHHHHHHHHHHHHHHCCCCCCC  |
| 905 | EEEEKKQDQYNNYEDEEYQRKGRGKGHP    | -48.19 | 48.4 | HHHHHHHHHHHHHHHHHHHHHHHHHHHHHHHHCCCCCCC  |
| 081 | EEEEKFRDQYNNYEDEEYQRKGRGKGHP    | -48.19 | 48.4 | CHHHHHHHHHHHHHHHHHHHHHHHHHHHHHHHHCCCCCCC |
| 195 | EEEEKFRDQYNNYEDEEYQKGRGKGHP     | -48.19 | 45.2 | CHHHHHHHHHHHHHHHHHHHHHHHHHHHHHHHHCCCCCCC |
| 548 | EEKKFLDQYNNFEDKMYQRYGKGKHP      | -48.19 | 51.6 | HHHHHHHHHHHHHHHHHHHHHHHHHHHHHHHHCCCCCCC  |
| 338 | EEKKFLDQYKNEYEDEEYQRKGRGKGHP    | -48.19 | 45.2 | HHHHHHHHHHHHHHHHHHHHHHHHHHHHHHHHCCCCCCC  |
| 638 | EEEQRKFEDQRNNEEEDKRYQREGRKGHP   | -48.19 | 45.2 | CHHHHHHHHHHHHHHHHHHHHHHHHHHHHHHHHCCCCCCC |
| 917 | EEEQKQFRDQFNNEWEHKKRQREGRGSKQN  | -48.18 | 38.7 | HHHHHHHHHHHHHHHHHHHHHHHHHHHHHHHHCCCCCCC  |
| 718 | DEERKKQEEQYRNDYEDREYQRKGRGKGHP  | -48.17 | 32.3 | HHHHHHHHHHHHHHHHHHHHHHHHHHHHHHHHCCCCCCC  |
| 294 | EEEQKQRQYNNDAEDRRFQRYGRGKGQN    | -48.16 | 38.7 | HHHHHHHHHHHHHHHHHHHHHHHHHHHHHHHHCCCCCCC  |
| 685 | EEEQRKQDQYNNWEDKRYQREGKKGKGNR   | -48.13 | 48.4 | HHHHHHHHHHHHHHHHHHHHHHHHHHHHHHHHCCCCCCC  |
| 501 | EEERRKQLQVESERKEDQRYQRYGWGKHP   | -48.13 | 35.5 | HHHHHHHHHHHHHHHHHHHHHHHHHHHHHHHHCCCCCCC  |
| 931 | EEEQKFRDQFNNEFEDEYQQQGRGKGHP    | -48.12 | 54.8 | HHHHHHHHHHHHHHHHHHHHHHHHHHHHHHHHCCCCCCC  |
| 986 | EEEQKFRDQYNNWEDEEYQRKGRGKGHP    | -48.12 | 48.4 | HHHHHHHHHHHHHHHHHHHHHHHHHHHHHHHHCCCCCCC  |
| 263 | EEEQRKFQDQYNNNEEDKRYQREGKKGKHS  | -48.12 | 45.2 | HHHHHHHHHHHHHHHHHHHHHHHHHHHHHHHHCCCCCCC  |
| 425 | EEEEKKQDQIENNERDSRYQQQGWGKHP    | -48.10 | 38.7 | HHHHHHHHHHHHHHHHHHHHHHHHHHHHHHHHCCCCCCC  |
| 664 | DEERKMLDQKNNEEEDRFQRYGKGKGNH    | -48.10 | 41.9 | HHHHHHHHHHHHHHHHHHHHHHHHHHHHHHHHCCCCCCC  |
| 617 | EEKKMLDQFNQEFEDQYQQKQGGKGNH     | -48.09 | 51.6 | HHHHHHHHHHHHHHHHHHHHHHHHHHHHHHHHCCCCCCC  |
| 404 | QEEKKMRDQYNNQEWEDKRYQREGKKGKHNH | -48.09 | 41.9 | CHHHHHHHHHHHHHHHHHHHHHHHHHHHHHHHHCCCCCCC |
| 247 | EEEARQQEQYSNEWEDKRYQREGRKGHP    | -48.09 | 38.7 | HHHHHHHHHHHHHHHHHHHHHHHHHHHHHHHHCCCCCCC  |
| 534 | EEEWKQMEQKNNEEEDKRYQREGRKGHP    | -48.09 | 41.9 | HHHHHHHHHHHHHHHHHHHHHHHHHHHHHHHHCCCCCCC  |
| 122 | EEEQRKQDQYNNYEHEQYQKGRGKGHP     | -48.07 | 35.5 | HHHHHHHHHHHHHHHHHHHHHHHHHHHHHHHHCCCCCCC  |
| 217 | EEEEKQQKRSNEKEDQRYQQQGWGKHNH    | -48.07 | 38.7 | HHHHHHHHHHHHHHHHHHHHHHHHHHHHHHHHCCCCCCC  |
| 051 | EEEEKWRDQKNNEEEDERYQRYGWGKHNH   | -48.06 | 41.9 | CHHHHHHHHHHHHHHHHHHHHHHHHHHHHHHHHCCCCCCC |
| 372 | EEYRWQDQKNNEEEDERYQQQGRGKGHP    | -48.06 | 41.9 | HHHHHHHHHHHHHHHHHHHHHHHHHHHHHHHHCCCCCCC  |
| 812 | EEWRKWIIDLKNEKEDKRYQREGRKGHP    | -48.05 | 38.7 | HHHHHHHHHHHHHHHHHHHHHHHHHHHHHHHHCCCCCCC  |
| 337 | EEERKKQLDQWKNRWEDEYFQQQGRGKGQN  | -48.05 | 38.7 | HHHHHHHHHHHHHHHHHHHHHHHHHHHHHHHHCCCCCCC  |
| 224 | EEKKMLDQINNEKEDEYFQQYQGGKGS     | -48.03 | 45.2 | HHHHHHHHHHHHHHHHHHHHHHHHHHHHHHHHCCCCCCC  |
| 741 | EEEQRKYEDQRNNEEDERYQRYGRGKGHP   | -48.00 | 38.7 | CHHHHHHHHHHHHHHHHHHHHHHHHHHHHHHHHCCCCCCC |
| 813 | EEEQKKYEDQRNQEEDKRYQREGQKGKHS   | -47.99 | 45.2 | CHHHHHHHHHHHHHHHHHHHHHHHHHHHHHHHHCCCCCCC |
| 424 | EEEEKKMQKMEQEREDKRYQQKGRGKGHP   | -47.98 | 38.7 | CHHHHHHHHHHHHHHHHHHHHHHHHHHHHHHHHCCCCCCC |
| 031 | EEERRKQEEQYRQEAEDQRYQREGWKGHP   | -47.97 | 38.7 | HHHHHHHHHHHHHHHHHHHHHHHHHHHHHHHHCCCCCCC  |
| 287 | EEEQRKQDKYNQESEQKRYQRYGGQKHS    | -47.97 | 38.7 | HHHHHHHHHHHHHHHHHHHHHHHHHHHHHHHHCCCCCCC  |
| 229 | EEEEKKQDKYNNEFEHKYQQQKGGQKHS    | -47.96 | 38.7 | HHHHHHHHHHHHHHHHHHHHHHHHHHHHHHHHCCCCCCC  |
| 665 | EEEEKRFQYNNNEFEDEYFQQKGGKGNH    | -47.96 | 35.5 | HHHHHHHHHHHHHHHHHHHHHHHHHHHHHHHHCCCCCCC  |
| 486 | EEERKQLDQSSNDREDRYQREGKKGKHS    | -47.95 | 35.5 | HHHHHHHHHHHHHHHHHHHHHHHHHHHHHHHHCCCCCCC  |
| 066 | EEEEKKQDQINNDEEDKRYQRYGKGKHS    | -47.95 | 41.9 | CHHHHHHHHHHHHHHHHHHHHHHHHHHHHHHHHCCCCCCC |
| 413 | EEEEKQDQWKNWEDRFYQKKGKGNH       | -47.95 | 38.7 | HHHHHHHHHHHHHHHHHHHHHHHHHHHHHHHHCCCCCCC  |
| 877 | EEQRKQKQFDNEKEHQRYQREGQGRGHS    | -47.95 | 35.5 | HHHHHHHHHHHHHHHHHHHHHHHHHHHHHHHHCCCCCCC  |
| 387 | EEKKFLDQYNNSEDEERYQQQGRGKGHP    | -47.95 | 48.4 | HHHHHHHHHHHHHHHHHHHHHHHHHHHHHHHHCCCCCCC  |
| 127 | EEEEKQQQQYQWEDEEYQRKGRGKGHP     | -47.94 | 35.5 | HHHHHHHHHHHHHHHHHHHHHHHHHHHHHHHHCCCCCCC  |
| 352 | EEEEKKQDQEKNEREDKRYQRYGRGKGHP   | -47.94 | 41.9 | CHHHHHHHHHHHHHHHHHHHHHHHHHHHHHHHHCCCCCCC |
| 717 | EEEEKKQDQIKNEKEDEEYQRRGKGHP     | -47.94 | 41.9 | CHHHHHHHHHHHHHHHHHHHHHHHHHHHHHHHHCCCCCCC |
| 112 | EEEEKQDQIKNEEEDKRYQYGRGKGHP     | -47.94 | 38.7 | HHHHHHHHHHHHHHHHHHHHHHHHHHHHHHHHCCCCCCC  |
| 363 | EEEEKQDQIKNEEEDQRYQQYGRGKGHP    | -47.94 | 38.7 | HHHHHHHHHHHHHHHHHHHHHHHHHHHHHHHHCCCCCCC  |
| 727 | EEEEKQDQIKNEKEDEEYQRYGKGKHS     | -47.94 | 38.7 | HHHHHHHHHHHHHHHHHHHHHHHHHHHHHHHHCCCCCCC  |
| 644 | EEEEKQDQIKNEKEDQYQKQGGKGNH      | -47.94 | 38.7 | HHHHHHHHHHHHHHHHHHHHHHHHHHHHHHHHCCCCCCC  |
| 147 | EEEEKQDQINNEAEDKRYQKEGKGNH      | -47.94 | 45.2 | HHHHHHHHHHHHHHHHHHHHHHHHHHHHHHHHCCCCCCC  |
| 285 | EEWKMDQFNNEKEDKRYQQQGWGKHNH     | -47.94 | 48.4 | HHHHHHHHHHHHHHHHHHHHHHHHHHHHHHHHCCCCCCC  |
| 989 | EEEEKQDQLNRRKEDEERYQREGRKGHP    | -47.92 | 38.7 | HHHHHHHHHHHHHHHHHHHHHHHHHHHHHHHHCCCCCCC  |
| 783 | EEEEKQDQEKNEKEDKRYQREGKKGKHNH   | -47.91 | 38.7 | HHHHHHHHHHHHHHHHHHHHHHHHHHHHHHHHCCCCCCC  |
| 516 | EEEEKQDQEKNEKEDKRYQRYGRGKGHP    | -47.91 | 38.7 | HHHHHHHHHHHHHHHHHHHHHHHHHHHHHHHHCCCCCCC  |

|     |                                   |        |      |                                        |
|-----|-----------------------------------|--------|------|----------------------------------------|
| 091 | EEEEERKRQDQEKNEKEDQRYQREGKGKGHSH  | -47.91 | 38.7 | HHHHHHHHHHHHHHHHHHHHHHHHHHHHHHHCCCCCCC |
| 550 | EEEEKKQQEQORNNEKEDEEYQRRGRGRGHQP  | -47.86 | 35.5 | HHHHHHHHHHHHHHHHHHHHHHHHHHHHHHHCCCCCCC |
| 601 | EEEEERKQQQORNNDREDDREYQQRGRGKGHQP | -47.85 | 35.5 | HHHHHHHHHHHHHHHHHHHHHHHHHHHHHHHCCCCCCC |
| 089 | EEEQRKQEQORNNDKEDDRRYQREGKGKGHNH  | -47.85 | 35.5 | HHHHHHHHHHHHHHHHHHHHHHHHHHHHHHHCCCCCCC |
| 660 | EEEQRKQEQORNNDKEDDRRYQRYGRGKGHQP  | -47.85 | 35.5 | HHHHHHHHHHHHHHHHHHHHHHHHHHHHHHHCCCCCCC |
| 220 | EEYRKLWDQKNEEDEDQRYQKQGRGKGHQP    | -47.83 | 41.9 | HHHHHHHHHHHHHHHHHHHHHHHHHHHHHHHCCCCCCC |
| 469 | EEEQRKQDQYSQEYEQEYQKEGRGQGHQP     | -47.82 | 32.3 | HHHHHHHHHHHHHHHHHHHHHHHHHHHHHHHCCCCCCC |
| 289 | DEERKKMLDQIKNEQEDQRYQREGRKGKGHQP  | -47.79 | 41.9 | HHHHHHHHHHHHHHHHHHHHHHHHHHHHHHHCCCCCCC |
| 484 | DEERKKMLDQYKNEYEDEEYQQNGSGKGHQY   | -47.79 | 41.9 | HHHHHHHHHHHHHHHHHHHHHHHHHHHHHHHCCCCCCC |
| 199 | EEEEKMRDQYNNEAEDERYQRKGMGKGHQP    | -47.79 | 45.2 | HHHHHHHHHHHHHHHHHHHHHHHHHHHHHHHCCCCCCC |
| 923 | EEEEKMRDQYNNEFEDQYQKEGQGKGHSH     | -47.79 | 41.9 | HHHHHHHHHHHHHHHHHHHHHHHHHHHHHHHCCCCCCC |
| 766 | EEKKMLDQMKNEKEDDEEYQRYGRGKGHQP    | -47.79 | 45.2 | HHHHHHHHHHHHHHHHHHHHHHHHHHHHHHHCCCCCCC |
| 978 | EEKKMLDQWKNEWEDQFYQKQGRGKGHQP     | -47.79 | 48.4 | HHHHHHHHHHHHHHHHHHHHHHHHHHHHHHHCCCCCCC |
| 608 | EEKKMLDQYKNEWEDDEEYQRKGRGKGHQP    | -47.79 | 45.2 | HHHHHHHHHHHHHHHHHHHHHHHHHHHHHHHCCCCCCC |
| 722 | EEKKMLDQYKNEYEDEQYQGGQGKGHQS      | -47.79 | 45.2 | HHHHHHHHHHHHHHHHHHHHHHHHHHHHHHHCCCCCCC |
| 997 | EEKRMMLDQIKNEKEDQYQKQGRGKGHQP     | -47.79 | 41.9 | HHHHHHHHHHHHHHHHHHHHHHHHHHHHHHHCCCCCCC |
| 960 | EEKRMMLDQMKNEKEDDEEYQRRGKGKGHSH   | -47.79 | 41.9 | HHHHHHHHHHHHHHHHHHHHHHHHHHHHHHHCCCCCCC |
| 639 | EEKRMMLDQMKNEKEDKRYQKQGRGKGHQP    | -47.79 | 41.9 | HHHHHHHHHHHHHHHHHHHHHHHHHHHHHHHCCCCCCC |
| 647 | EEKRMMLDQMKNEKEDDEEYQKQGRGKGHQP   | -47.79 | 41.9 | HHHHHHHHHHHHHHHHHHHHHHHHHHHHHHHCCCCCCC |
| 008 | EEKRMMLDQYNNESEDKRYQRYGRGKGHQP    | -47.79 | 45.2 | HHHHHHHHHHHHHHHHHHHHHHHHHHHHHHHCCCCCCC |
| 553 | EEERKQLDQIKNKEDDRDYQREGKGKGHNH    | -47.78 | 38.7 | HHHHHHHHHHHHHHHHHHHHHHHHHHHHHHHCCCCCCC |
| 064 | EEERKQLDQIKNKEDDRRYQREGRKGKGHQP   | -47.78 | 38.7 | HHHHHHHHHHHHHHHHHHHHHHHHHHHHHHHCCCCCCC |
| 514 | EEERKQLDQKNNDEEDRRYQRYGQKGGHQS    | -47.78 | 41.9 | HHHHHHHHHHHHHHHHHHHHHHHHHHHHHHHCCCCCCC |
| 246 | EEERKQLDQLKNRQEDERYQREGKGKGHNH    | -47.78 | 41.9 | HHHHHHHHHHHHHHHHHHHHHHHHHHHHHHHCCCCCCC |
| 545 | EEERKQLDQYRNEWEDERYQRQGRGKGHQP    | -47.78 | 35.5 | HHHHHHHHHHHHHHHHHHHHHHHHHHHHHHHCCCCCCC |
| 908 | EEERKQLDQYSNEWEDDEEYQRKGRGKGHNP   | -47.78 | 35.5 | HHHHHHHHHHHHHHHHHHHHHHHHHHHHHHHCCCCCCC |
| 113 | EEERKQLDQYRNEKEDKRYQREGKGKGHSS    | -47.78 | 38.7 | HHHHHHHHHHHHHHHHHHHHHHHHHHHHHHHCCCCCCC |
| 192 | EEEEKRRDAKNNEEDERYQQQGRGKGHQP     | -47.77 | 41.9 | CHHHHHHHHHHHHHHHHHHHHHHHHHHHHHHCCCCCCC |
| 005 | EEEEKQDQAYNNRAEDQRYQREGWKGKGHYP   | -47.77 | 41.9 | HHHHHHHHHHHHHHHHHHHHHHHHHHHHHHHCCCCCCC |
| 886 | EEERKQDQYRNEEADQRYQREGKGKGHNH     | -47.77 | 41.9 | HHHHHHHHHHHHHHHHHHHHHHHHHHHHHHHCCCCCCC |
| 752 | EEERKQLDQIKNEKEDDEEYQRYGRGKGHQP   | -47.77 | 48.4 | HHHHHHHHHHHHHHHHHHHHHHHHHHHHHHHCCCCCCC |
| 293 | EEERKQLDQYKNEWEDDEEYQRKGRGKGHQP   | -47.77 | 45.2 | HHHHHHHHHHHHHHHHHHHHHHHHHHHHHHHCCCCCCC |
| 215 | EEERKQLDQEKNEKEDERYQQQGGKGGHSS    | -47.77 | 41.9 | HHHHHHHHHHHHHHHHHHHHHHHHHHHHHHHCCCCCCC |
| 360 | EEERKQLDQEKNEKEDQRYQREGRKGKGHQP   | -47.77 | 41.9 | HHHHHHHHHHHHHHHHHHHHHHHHHHHHHHHCCCCCCC |
| 070 | EEERKQLDQIKNEKEDDEEYQRRGQGGKGHQS  | -47.77 | 41.9 | HHHHHHHHHHHHHHHHHHHHHHHHHHHHHHHCCCCCCC |
| 826 | EEERKQLDQWKNEFEDKYQYQEGQGKGGHQP   | -47.77 | 41.9 | HHHHHHHHHHHHHHHHHHHHHHHHHHHHHHHCCCCCCC |
| 507 | EEERKQLDQWKNEYEDEEYQRKGRGKGHQP    | -47.77 | 41.9 | HHHHHHHHHHHHHHHHHHHHHHHHHHHHHHHCCCCCCC |
| 077 | EEERKQLDQYKNEYEDQYQRQGRGKGHQP     | -47.77 | 41.9 | HHHHHHHHHHHHHHHHHHHHHHHHHHHHHHHCCCCCCC |
| 163 | EEERKQLDQYNNEWEDDEEYQRKGRGKGHNP   | -47.77 | 45.2 | HHHHHHHHHHHHHHHHHHHHHHHHHHHHHHHCCCCCCC |
| 729 | EEERKYDQORNNEEEDQRYQREGRKGKGHQP   | -47.77 | 41.9 | CHHHHHHHHHHHHHHHHHHHHHHHHHHHHHHCCCCCCC |
| 340 | EQEERKYDQYNNEADKRYQREGKGKGHSH     | -47.77 | 41.9 | CHHHHHHHHHHHHHHHHHHHHHHHHHHHHHHCCCCCCC |
| 672 | EREQRYQDQRSNEKEDDEEYQRRGQGGKGNNS  | -47.75 | 35.5 | HHHHHHHHHHHHHHHHHHHHHHHHHHHHHHHCCCCCCC |
| 505 | EEERKQLDQEKNEKEDKRYQRYGRGKGHQP    | -47.75 | 38.7 | HHHHHHHHHHHHHHHHHHHHHHHHHHHHHHHCCCCCCC |
| 827 | EQEERKQEQYNNWDKRYQREGDGKGGHQP     | -47.75 | 32.3 | HHHHHHHHHHHHHHHHHHHHHHHHHHHHHHHCCCCCCC |
| 347 | EEERKQRQRENEDQRYQRYGRGKGHQP       | -47.75 | 35.5 | HHHHHHHHHHHHHHHHHHHHHHHHHHHHHHHCCCCCCC |
| 571 | EEERKQRDKFNNEKEQRYQQQGKGGHSS      | -47.73 | 41.9 | HHHHHHHHHHHHHHHHHHHHHHHHHHHHHHHCCCCCCC |
| 261 | EEERKQDQYNNEWEDDEEYQRKGRGKGDQR    | -47.73 | 48.4 | HHHHHHHHHHHHHHHHHHHHHHHHHHHHHHHCCCCCCC |
| 100 | EEEQKQDQKNNDEEHRRYQQYGRGQGHQP     | -47.73 | 35.5 | HHHHHHHHHHHHHHHHHHHHHHHHHHHHHHHCCCCCCC |
| 535 | EEEQKQRDKFNNEFEDKRYQKQGGKGGHQP    | -47.72 | 48.4 | HHHHHHHHHHHHHHHHHHHHHHHHHHHHHHHCCCCCCC |
| 648 | EEERKQLDQYKNEYEDEEYQRQGRGKGHQP    | -47.72 | 35.5 | HHHHHHHHHHHHHHHHHHHHHHHHHHHHHHHCCCCCCC |
| 227 | EEERKQEQYSNRYEDEEYQREGRKGKGHSH    | -47.72 | 35.5 | HHHHHHHHHHHHHHHHHHHHHHHHHHHHHHHCCCCCCC |
| 651 | EEERKQLDQIKNEKEDQYQKGRGKGKGHNH    | -47.71 | 41.9 | HHHHHHHHHHHHHHHHHHHHHHHHHHHHHHHCCCCCCC |
| 868 | EEERKQRDQEKNEKEDDRRYQREGKGKGHSH   | -47.70 | 35.5 | HHHHHHHHHHHHHHHHHHHHHHHHHHHHHHHCCCCCCC |
| 715 | DEERKQEDQERNEKEDDEEYQRYGWGKGHNP   | -47.69 | 38.7 | CHHHHHHHHHHHHHHHHHHHHHHHHHHHHHHCCCCCCC |
| 779 | DEERKQHDQESNEKEDKRYQREGKGKGHNH    | -47.69 | 38.7 | HHHHHHHHHHHHHHHHHHHHHHHHHHHHHHHCCCCCCC |
| 394 | EEEQRKQYDQEKNEKEDERYQQQGWGKGHNP   | -47.69 | 38.7 | HHHHHHHHHHHHHHHHHHHHHHHHHHHHHHHCCCCCCC |
| 398 | EEERKQRQQYNRAEDERYQREGRKGKGHQP    | -47.69 | 38.7 | HHHHHHHHHHHHHHHHHHHHHHHHHHHHHHHCCCCCCC |
| 541 | EEEEKKQDQYNNEFEDEYQYQGGKGGDSR     | -47.68 | 51.6 | CHHHHHHHHHHHHHHHHHHHHHHHHHHHHHHCCCCCCC |
| 086 | EEERKQLEQYKNEWEDDEEYQRKGRGKGHQP   | -47.68 | 41.9 | HHHHHHHHHHHHHHHHHHHHHHHHHHHHHHHCCCCCCC |
| 866 | EEERKQLEQYKNEWEDKRYQREGRKGKGHQP   | -47.68 | 41.9 | HHHHHHHHHHHHHHHHHHHHHHHHHHHHHHHCCCCCCC |
| 093 | EEERKQDQORNHEKEQERYQQQGRGQGHQP    | -47.67 | 38.7 | HHHHHHHHHHHHHHHHHHHHHHHHHHHHHHHCCCCCCC |
| 846 | EEEQRKFYDQYNNEYEDQYQRKGRGKGHQP    | -47.67 | 45.2 | HHHHHHHHHHHHHHHHHHHHHHHHHHHHHHHCCCCCCC |
| 278 | EEEQKQRDKFNNEFEQKRYQKEGRGQGHQP    | -47.67 | 48.4 | HHHHHHHHHHHHHHHHHHHHHHHHHHHHHHHCCCCCCC |
| 461 | EEERKNQEKYSNEWEDKRYQREGRKGKGHQP   | -47.66 | 38.7 | HHHHHHHHHHHHHHHHHHHHHHHHHHHHHHHCCCCCCC |
| 744 | EEERKQLDQWKNEWEDQYQGGQGKGGHSS     | -47.66 | 41.9 | HHHHHHHHHHHHHHHHHHHHHHHHHHHHHHHCCCCCCC |
| 716 | EEEQRKQDQYNNEWEDDEEYQRKGGQGKGHQ   | -47.66 | 35.5 | HHHHHHHHHHHHHHHHHHHHHHHHHHHHHHHCCCCCCC |
| 357 | DEQRKMLDQYKNEYEDEEYQRRGKGKGHQP    | -47.66 | 45.2 | HHHHHHHHHHHHHHHHHHHHHHHHHHHHHHHCCCCCCC |

|     |                                     |        |      |                                     |
|-----|-------------------------------------|--------|------|-------------------------------------|
| 479 | EEEEERKQRQQYNNEAEDQRYQREGRGKGHQP    | -47.65 | 41.9 | HHHHHHHHHHHHHHHHHHHHHHHHHHHHCCCCCCC |
| 977 | EEEEERKQRQQYNNESEDERYQQQKQKGGHNNH   | -47.65 | 38.7 | HHHHHHHHHHHHHHHHHHHHHHHHHHHHCCCCCCC |
| 579 | EEEEERKQRQQYNNEYEDEEYQRKGRGKGHQP    | -47.65 | 38.7 | HHHHHHHHHHHHHHHHHHHHHHHHHHHHCCCCCCC |
| 720 | EEEEKRQQEQQRNNEEEDERYQRQGRGKGHQP    | -47.65 | 38.7 | HHHHHHHHHHHHHHHHHHHHHHHHHHHHCCCCCCC |
| 180 | EEERKQEQEQYRNEFEDQYYQQKQKGGKGHSH    | -47.65 | 35.5 | HHHHHHHHHHHHHHHHHHHHHHHHHHHHCCCCCCC |
| 123 | EEERRKQLQQKNNEEEDQRYQRYGWGKGHNP     | -47.65 | 41.9 | HHHHHHHHHHHHHHHHHHHHHHHHHHHHCCCCCCC |
| 257 | EEEQQRKQEDKRRNEKEQKRYQREGKQGKGHSH   | -47.65 | 35.5 | HHHHHHHHHHHHHHHHHHHHHHHHHHHHCCCCCCC |
| 374 | EEEQRKQLQDAINNRAEDQRYQREGRGKGHQP    | -47.64 | 41.9 | HHHHHHHHHHHHHHHHHHHHHHHHHHHHCCCCCCC |
| 462 | EEEQRKHHHEKESNEREDEEYQRKGRGKGHQP    | -47.62 | 38.7 | HHHHHHHHHHHHHHHHHHHHHHHHHHHHCCCCCCC |
| 037 | EEEQRKQQQQYNHDWEDRRYQREGWGKGHNP     | -47.61 | 38.7 | HHHHHHHHHHHHHHHHHHHHHHHHHHHHCCCCCCC |
| 141 | EEEQKQKQQEQYSNSESEDERYQRYGQKGGHQS   | -47.61 | 38.7 | HHHHHHHHHHHHHHHHHHHHHHHHHHHHCCCCCCC |
| 927 | EQEQRKQQEQQYNNSEDEERYQQQGRGKGHQP    | -47.61 | 35.5 | HHHHHHHHHHHHHHHHHHHHHHHHHHHHCCCCCCC |
| 967 | EEEEERKQQQRNNEKEDQRYQREGKQKGGHNN    | -47.58 | 38.7 | HHHHHHHHHHHHHHHHHHHHHHHHHHHHCCCCCCC |
| 154 | EEEEERKQQQRNNEKEDQRYQREGKQKGGHNS    | -47.58 | 38.7 | HHHHHHHHHHHHHHHHHHHHHHHHHHHHCCCCCCC |
| 795 | EEEEERKQQKKNNEEEDKRYQREGWGKGHNP     | -47.58 | 41.9 | HHHHHHHHHHHHHHHHHHHHHHHHHHHHCCCCCCC |
| 039 | EEEQRKYEDQRNNEEEDQRYQRYGKQKGGDSR    | -47.55 | 48.4 | CHHHHHHHHHHHHHHHHHHHHHHHHHHHCCCCCCC |
| 876 | EQEERKKQEYKNEWEDKRYQREGKQKGGHNN     | -47.53 | 32.3 | HHHHHHHHHHHHHHHHHHHHHHHHHHHHCCCCCCC |
| 430 | EEERRKQLDQYNNESEDERYQRYGRGKGHQP     | -47.53 | 45.2 | HHHHHHHHHHHHHHHHHHHHHHHHHHHHCCCCCCC |
| 620 | EEEEERKQQQKFSNEAEDDEEYQRRGKGGKGHSS  | -47.53 | 45.2 | HHHHHHHHHHHHHHHHHHHHHHHHHHHHCCCCCCC |
| 381 | EEEQKQQRDQYNNEAEQKRYQREGKQKGGHNN    | -47.52 | 41.9 | HHHHHHHHHHHHHHHHHHHHHHHHHHHHCCCCCCC |
| 622 | EEEQRKQQDQYNNEAEQRYQREGRGQGHQP      | -47.52 | 38.7 | HHHHHHHHHHHHHHHHHHHHHHHHHHHHCCCCCCC |
| 940 | EEEQRKQQDQYNNEHEQEYRQKQGGWQGHNP     | -47.52 | 35.5 | HHHHHHHHHHHHHHHHHHHHHHHHHHHHCCCCCCC |
| 949 | EEEQRKQQDQYNNESEQKRYQKQEGKQGGHSS    | -47.52 | 35.5 | HHHHHHHHHHHHHHHHHHHHHHHHHHHHCCCCCCC |
| 021 | EEEQRKQQDQYNNEWEQKRYQREGKQKGGHNN    | -47.52 | 35.5 | HHHHHHHHHHHHHHHHHHHHHHHHHHHHCCCCCCC |
| 300 | EEEQRKQQDQYNNEWEQRYQRYGRGQGHQP      | -47.52 | 35.5 | HHHHHHHHHHHHHHHHHHHHHHHHHHHHCCCCCCC |
| 631 | EEEQRKQEQRKRRNEKEDKRYQKQEGRGKGHQP   | -47.51 | 38.7 | HHHHHHHHHHHHHHHHHHHHHHHHHHHHCCCCCCC |
| 242 | EEEEKRFLDKMKNEAEDRRYQRYGRGKGHQP     | -47.51 | 51.6 | HHHHHHHHHHHHHHHHHHHHHHHHHHHHCCCCCCC |
| 150 | EEEEERKRDQYNNDSEDRYQRYGRGKGHQP      | -47.49 | 38.7 | HHHHHHHHHHHHHHHHHHHHHHHHHHHHCCCCCCC |
| 754 | EEEEERKRDQYNNEWEDEEYQRKGRGKGHQP     | -47.48 | 45.2 | CHHHHHHHHHHHHHHHHHHHHHHHHHHHCCCCCCC |
| 982 | EEEEERKRDQYNNEWEDEEYQRYGRGKGHQP     | -47.48 | 41.9 | HHHHHHHHHHHHHHHHHHHHHHHHHHHHCCCCCCC |
| 391 | EEEEERKRDQYNNEWEDEEYQRYGRGKGHQP     | -47.48 | 41.9 | HHHHHHHHHHHHHHHHHHHHHHHHHHHHCCCCCCC |
| 619 | EQEERKRDQYNNEWEDEEYQRKGRGKGHQP      | -47.48 | 38.7 | HHHHHHHHHHHHHHHHHHHHHHHHHHHHCCCCCCC |
| 528 | EEEEERKQEQYSNDEEYQRKGRGKGHQP        | -47.48 | 32.3 | HHHHHHHHHHHHHHHHHHHHHHHHHHHHCCCCCCC |
| 472 | QDQQRKQDDHYNNRWEDEEYQRKGRGKGHQP     | -47.47 | 35.5 | CHHHHHHHHHHHHHHHHHHHHHHHHHHHCCCCCCC |
| 513 | EEERRKQLDQQNNDEEQRRYQQYGWQGHYP      | -47.46 | 35.5 | HHHHHHHHHHHHHHHHHHHHHHHHHHHHCCCCCCC |
| 992 | EEEEERKQRQQFNNEFEDQYYQQKQKGGKGHSH   | -47.46 | 41.9 | HHHHHHHHHHHHHHHHHHHHHHHHHHHHCCCCCCC |
| 259 | EEERRKQLDQYNNRSEQERYQKQKGGKGGHNS    | -47.43 | 35.5 | HHHHHHHHHHHHHHHHHHHHHHHHHHHHCCCCCCC |
| 447 | EEEEERKQKQKWKNEWEDEEYQRYGRGKGGDSR   | -47.41 | 48.4 | CHHHHHHHHHHHHHHHHHHHHHHHHHHHCCCCCCC |
| 390 | EEEEERKRDQEKNRKEDEERYQRKGRGKGHQP    | -47.41 | 35.5 | HHHHHHHHHHHHHHHHHHHHHHHHHHHHCCCCCCC |
| 103 | EEEEKRQEDQRNNEKEQEYQRRGKGGKGGHSS    | -47.40 | 35.5 | HHHHHHHHHHHHHHHHHHHHHHHHHHHHCCCCCCC |
| 304 | EEEEERKQQDQYKNEWEQEYQRYGRGQGGHSH    | -47.39 | 32.3 | HHHHHHHHHHHHHHHHHHHHHHHHHHHHCCCCCCC |
| 856 | EEEEERKQQDQYNNEWEQEYQRKGRGQGHQP     | -47.39 | 35.5 | HHHHHHHHHHHHHHHHHHHHHHHHHHHHCCCCCCC |
| 577 | EEEEERKQRDQYNNESEQKRYQRYGQGGQGHQS   | -47.39 | 35.5 | HHHHHHHHHHHHHHHHHHHHHHHHHHHHCCCCCCC |
| 332 | EEEEERKQRDQYNNEWEQEYQRKGRGQGHQP     | -47.39 | 35.5 | HHHHHHHHHHHHHHHHHHHHHHHHHHHHCCCCCCC |
| 646 | EEERRKQLDQYNNEEQRYQRYGRGKGGHNNH     | -47.39 | 38.7 | HHHHHHHHHHHHHHHHHHHHHHHHHHHHCCCCCCC |
| 542 | EEEEKKQEDQRNNEEEDQRYQRYGRGQGHQP     | -47.37 | 38.7 | HHHHHHHHHHHHHHHHHHHHHHHHHHHHCCCCCCC |
| 676 | EEEQKQREQREDEKRDQRYQRSGRGKGHQP      | -47.36 | 38.7 | HHHHHHHHHHHHHHHHHHHHHHHHHHHHCCCCCCC |
| 302 | EEEEERKQQDQRKNRKEQEYQRRGQGGHQP      | -47.36 | 29.0 | HHHHHHHHHHHHHHHHHHHHHHHHHHHHCCCCCCC |
| 749 | EEERRKQLQQYKQSESEDQRYQRYGRGKGHQP    | -47.34 | 38.7 | HHHHHHHHHHHHHHHHHHHHHHHHHHHHCCCCCCC |
| 371 | EEQRKQLDQKNNEEEDKRYQKQEGWGKGHYP     | -47.33 | 51.6 | HHHHHHHHHHHHHHHHHHHHHHHHHHHHCCCCCCC |
| 878 | EEEKRRQEQQNNEKEDSRYQQQGWGKGHNP      | -47.32 | 38.7 | HHHHHHHHHHHHHHHHHHHHHHHHHHHHCCCCCCC |
| 897 | EEEEKKYQEQYNNDEDEEYQRKGRGKGHQP      | -47.29 | 38.7 | CHHHHHHHHHHHHHHHHHHHHHHHHHHHCCCCCCC |
| 972 | EQEQRKYEEQRNNEEEDQRYQREGHGKGHQR     | -47.29 | 35.5 | HHHHHHHHHHHHHHHHHHHHHHHHHHHHCCCCCCC |
| 990 | EEEEKKYQEKYKNEFEDKYYQQKQKGGKGHQP    | -47.29 | 41.9 | CHHHHHHHHHHHHHHHHHHHHHHHHHHHCCCCCCC |
| 401 | EEEEERKYEKYNNESEDKRYQQQGRGKGHQP     | -47.29 | 41.9 | CHHHHHHHHHHHHHHHHHHHHHHHHHHHCCCCCCC |
| 073 | EQEERKYQEQRNNEEEDKRYQRYGWGKGHYP     | -47.29 | 38.7 | CHHHHHHHHHHHHHHHHHHHHHHHHHHHCCCCCCC |
| 450 | EQEQRHQEQKFSNEFEDQYYQKYGGKGGHQP     | -47.27 | 38.7 | HHHHHHHHHHHHHHHHHHHHHHHHHHHHCCCCCCC |
| 311 | EQEQRHQEQKYSNEYEDEYQRYGRGKGGKGHSH   | -47.27 | 35.5 | HHHHHHHHHHHHHHHHHHHHHHHHHHHHCCCCCCC |
| 527 | EEEEERKRDQENNERDEKRYQREGKGGKGHSH    | -47.25 | 45.2 | CHHHHHHHHHHHHHHHHHHHHHHHHHHHCCCCCCC |
| 327 | EQEERKFRDQYNNDYEEHYYQRKGRGQGGHQP    | -47.24 | 32.3 | CHHHHHHHHHHHHHHHHHHHHHHHHHHHCCCCCCC |
| 399 | EEEEERKQQDDYNNRWEDEERYQREGKGGKGGHSH | -47.24 | 38.7 | HHHHHHHHHHHHHHHHHHHHHHHHHHHHCCCCCCC |
| 145 | EEERRKQLDDYKNRSEDEQRYQRYGRGKGHQP    | -47.24 | 38.7 | HHHHHHHHHHHHHHHHHHHHHHHHHHHHCCCCCCC |
| 930 | EQEERKKEEQFRNDFEDRRYQQQEGRGKGHQP    | -47.23 | 32.3 | HHHHHHHHHHHHHHHHHHHHHHHHHHHHCCCCCCC |
| 517 | EEEKRRQLDQYKNRYEQEYQRKGRGQGGHQP     | -47.23 | 32.3 | HHHHHHHHHHHHHHHHHHHHHHHHHHHHCCCCCCC |
| 211 | EEEMRKLQDKINNEKEQEYQRRGQGGHQP       | -47.23 | 38.7 | HHHHHHHHHHHHHHHHHHHHHHHHHHHHCCCCCCC |
| 232 | EEEEEKRRDKYNNEWEQKRYQREGRGQGGHQP    | -47.22 | 41.9 | CHHHHHHHHHHHHHHHHHHHHHHHHHHHCCCCCCC |
| 440 | EEEEERKQEKKWKNEWEDEEYQKQGGKGGHSH    | -47.19 | 41.9 | CHHHHHHHHHHHHHHHHHHHHHHHHHHHCCCCCCC |

|     |                                    |        |      |                                        |
|-----|------------------------------------|--------|------|----------------------------------------|
| 474 | EEEEERKQDDRRNNRKEDEERYQQQGWGKGHNP  | -47.17 | 38.7 | HHHHHHHHHHHHHHHHHHHHHHHHHHHHHHCCCCCCCC |
| 952 | EEEEERKQDDRRNNRKEDEQRYQREGKKGKHNNH | -47.17 | 38.7 | HHHHHHHHHHHHHHHHHHHHHHHHHHHHHHCCCCCCCC |
| 221 | EEERRKQLEQYKNEWEDEEYQQRKGRGKGHQF   | -47.16 | 38.7 | HHHHHHHHHHHHHHHHHHHHHHHHHHHHHHCCCCCCCC |
| 556 | EEEEKKKREQYNNEHEDQRYQQQGRGKGHQF    | -47.16 | 41.9 | CHHHHHHHHHHHHHHHHHHHHHHHHHHHHHCCCCCCCC |
| 375 | EEEEKKKREQYNNEYEDQRYQQRKGRGKGHQF   | -47.16 | 41.9 | CHHHHHHHHHHHHHHHHHHHHHHHHHHHHHCCCCCCCC |
| 334 | EEEEERKKEEQKRNEEEDQRYQRYGWGKGHNP   | -47.16 | 35.5 | HHHHHHHHHHHHHHHHHHHHHHHHHHHHHHCCCCCCCC |
| 981 | EEQERKNQQYNNEYEDEEYQQRKGRGKGHNP    | -47.16 | 41.9 | HHHHHHHHHHHHHHHHHHHHHHHHHHHHHHCCCCCCCC |
| 736 | EEEQKKQREQFNNEYEHQYKQQQGGSGKQS     | -47.15 | 35.5 | HHHHHHHHHHHHHHHHHHHHHHHHHHHHHHCCCCCCCC |
| 668 | EQERRHOLEKYKNEWEDEYYQQYGGGKGHQF    | -47.14 | 38.7 | HHHHHHHHHHHHHHHHHHHHHHHHHHHHHHCCCCCCCC |
| 209 | EEERRKQLDKYKNEYEHEEKQRKGRGSGKQN    | -47.14 | 35.5 | HHHHHHHHHHHHHHHHHHHHHHHHHHHHHHCCCCCCCC |
| 444 | EEEEKKKQEKFSNEFEDRRYQQEGQGKGHQS    | -47.14 | 45.2 | HHHHHHHHHHHHHHHHHHHHHHHHHHHHHHCCCCCCCC |
| 010 | EEQRRKLQQWKNEYEDQSYQREGRKGKGHQF    | -47.14 | 41.9 | HHHHHHHHHHHHHHHHHHHHHHHHHHHHHHCCCCCCCC |
| 483 | EEEQRKQQDQYNNEWEQEYQQRKGRGQGHQP    | -47.13 | 35.5 | HHHHHHHHHHHHHHHHHHHHHHHHHHHHHHCCCCCCCC |
| 903 | EEEQRKQQDQYSNDFEQRYQQQGGQGGHQS     | -47.12 | 29.0 | HHHHHHHHHHHHHHHHHHHHHHHHHHHHHHCCCCCCCC |
| 268 | EQEERKQEQYEDEYRDEQYQQQGGGKGHQF     | -47.11 | 29.0 | HHHHHHHHHHHHHHHHHHHHHHHHHHHHHHCCCCCCCC |
| 581 | EQEQRHQQEQYNNDYEDQRYQQRKGRGKGHQF   | -47.11 | 32.3 | HHHHHHHHHHHHCCCCHHHHHHHHHHCCCCCCCC     |
| 282 | EQEERNHQEKFNNEYEDKSYQREGRKGKGHQF   | -47.09 | 41.9 | CHHHHHHHHHHHHHHHHHHHHHHHHHHHHHCCCCCCCC |
| 389 | EQEERKQEQEKRNEKEDKRYQQRKGRGKGHQF   | -47.08 | 35.5 | CHHHHHHHHHHHHHHHHHHHHHHHHHHHHHCCCCCCCC |
| 794 | EEEEERKQKNNDEEDKRYQRYGRGKGHQF      | -47.07 | 35.5 | CHHHHHHHHHHHHHHHHHHHHHHHHHHHHHCCCCCCCC |
| 612 | EEEEERKQQQRNNEEEDQRYQREGKKGKGHSS   | -47.07 | 38.7 | HHHHHHHHHHHHHHHHHHHHHHHHHHHHHHCCCCCCCC |
| 019 | EEKKKWLEKLNNEKEDKRYQREGRKGKGHQF    | -47.06 | 48.4 | HHHHHHHHHHHHHHHHHHHHHHHHHHHHHHCCCCCCCC |
| 641 | EEEARKQEQYSNEHEDEQRYQRQGGKGGDSR    | -47.04 | 45.2 | HHHHHHHHHHHHHHHHHHHHHHHHHHHHHHCCCCCCCC |
| 863 | EEERRKQQQYSNEYEDQYYQQKGGKGGHQF     | -47.04 | 35.5 | HHHHHHHHHHHHHHHHHHHHHHHHHHHHHHCCCCCCCC |
| 065 | EEEEERYQDQKNNEEDQRYQRYGKGKGDSR     | -47.04 | 48.4 | CHHHHHHHHHHHHHHHHHHHHHHHHHHHHHCCCCCCCC |
| 637 | EEEEQRDRDQYNQEAQERYQQQGGKGGHNNH    | -47.03 | 38.7 | HHHHHHHHHHHHHHHHHHHHHHHHHHHHHHCCCCCCCC |
| 798 | EEEQKKRDQFNQEKQERYQQQGGGQGHQP      | -47.02 | 41.9 | HHHHHHHHHHHHHHHHHHHHHHHHHHHHHHCCCCCCCC |
| 602 | EEKRRFLQKMEQEREDKEYQQKGRGKGHQF     | -47.01 | 45.2 | HHHHHHHHHHHHHHHHHHHHHHHHHHHHHHCCCCCCCC |
| 769 | EEEEKKKRQDQKNEEHEHYQQQGGKGGHNNH    | -47.01 | 35.5 | CHHHHHHHHHHHHHHHHHHHHHHHHHHHHHCCCCCCCC |
| 168 | EEEEERKQDQINNEADKRYQREGRKGGNQN     | -47.00 | 45.2 | HHHHHHHHHHHHHHHHHHHHHHHHHHHHHHCCCCCCCC |
| 365 | QDEERKQDQQRNNDNEQRYQRSGRGGHQF      | -47.00 | 29.0 | CHHHHHHHHHHHHHHHHHHHHHHHHHHHHHCCCCCCCC |
| 412 | EEKKKLLEQISNDKEDREYQRRGRGKGHQF     | -47.00 | 38.7 | HHHHHHHHHHHHHHHHHHHHHHHHHHHHHHCCCCCCCC |
| 205 | EEEQRKLYEQISNEKEDQYQKQGGKGGHQF     | -46.99 | 35.5 | HHHHHHHHHHHHHHHHHHHHHHHHHHHHHHCCCCCCCC |
| 506 | EEEEKKQRDQNNKEQKRYQREGRGGHQF       | -46.98 | 38.7 | HHHHHHHHHHHHHHHHHHHHHHHHHHHHHHCCCCCCCC |
| 284 | EQEERHQEQYNNDWEDQRYQREGWGGKHNP     | -46.98 | 32.3 | CHHHHHHHHHHHHHHHHHHHHHHHHHHHHHCCCCCCCC |
| 319 | EEEQRKQEQQWQNEWEDQYYQQKGGKGGHNNH   | -46.97 | 35.5 | HHHHHHHHHHHHHHHHHHHHHHHHHHHHHHCCCCCCCC |
| 169 | EEEEERKKRQYSNDFEDRYQQQGGKGGHNNH    | -46.97 | 32.3 | CHHHHHHHHHHHHHHHHHHHHHHHHHHHHHCCCCCCCC |
| 850 | EEEEKKKREQYNNEAEDQRYQREGRKGKGHQF   | -46.96 | 45.2 | CHHHHHHHHHHHHHHHHHHHHHHHHHHHHHCCCCCCCC |
| 838 | EEEEERKREDQFRQEFEDQYQQKGGKGGHNNH   | -46.95 | 41.9 | HHHHHHHHHHHHHHHHHHHHHHHHHHHHHHCCCCCCCC |
| 456 | EEEEERKQEKWKNEFEDQYQQKGGKGGHSH     | -46.94 | 38.7 | HHHHHHHHHHHHHHHHHHHHHHHHHHHHHHCCCCCCCC |
| 778 | EEERRKQLQKMKNEKEHEEYQRRGRGQGHQP    | -46.93 | 35.5 | HHHHHHHHHHHHHHHHHHHHHHHHHHHHHHCCCCCCCC |
| 174 | EEERKQLDQYNNESEQRYQKQGGKGGHSS      | -46.92 | 41.9 | HHHHHHHHHHHHHHHHHHHHHHHHHHHHHHCCCCCCCC |
| 837 | EEERRKQLDQMKNEKEQEYQRYGRGQGHQP     | -46.92 | 35.5 | HHHHHHHHHHHHHHHHHHHHHHHHHHHHHHCCCCCCCC |
| 090 | EEEEERKREKENEKEDKRYQREGRKGKGHQF    | -46.91 | 41.9 | HHHHHHHHHHHHHHHHHHHHHHHHHHHHHHCCCCCCCC |
| 309 | EEEEERKREKENEKEDKRYQRYGKGKGHNS     | -46.91 | 41.9 | HHHHHHHHHHHHHHHHHHHHHHHHHHHHHHCCCCCCCC |
| 650 | EEEEKKNREQYNNEEDQRYQRYGKGKGHSS     | -46.90 | 41.9 | HHHHHHHHHHHHCCCCHHHHHHHHHHHHCCCCCCCC   |
| 234 | EEEEERKNQEQFSNEFEDQYQQKGGKGGHQF    | -46.90 | 38.7 | HHHHHHHHHHHHHHHHHHHHHHHHHHHHHHCCCCCCCC |
| 963 | EEEEERKQDKFNNEFEQKRYQQKGRGQGHQP    | -46.82 | 45.2 | HHHHHHHHHHHHHHHHHHHHHHHHHHHHHHCCCCCCCC |
| 362 | EEEEERKQRQYNNEWEDKRYQREGKKGKGHSH   | -46.81 | 38.7 | HHHHHHHHHHHHHHHHHHHHHHHHHHHHHHCCCCCCCC |
| 276 | EQEKRMLEKISNEKEDQRYQRRGGKGGHQS     | -46.79 | 38.7 | HHHHHHHHHHHHHHHHHHHHHHHHHHHHHHCCCCCCCC |
| 597 | EEEQRKQQDQYNNDYEQRYQQRKGRGQGHQP    | -46.79 | 32.3 | HHHHHHHHHHHHHHHHHHHHHHHHHHHHHHCCCCCCCC |
| 815 | EEEEKKQRDQFNNEYEQSYQREGRGGHQF      | -46.78 | 41.9 | HHHHHHHHHHHHHHHHHHHHHHHHHHHHHHCCCCCCCC |
| 191 | EEERKQEDQRNNEKEQEYQRYGRGQGHQP      | -46.78 | 35.5 | HHHHHHHHHHHHHHHHHHHHHHHHHHHHHHCCCCCCCC |
| 015 | EEERRKQLEKISNEEEDKEYQQRGKKGHQF     | -46.77 | 41.9 | HHHHHHHHHHHHHHHHHHHHHHHHHHHHHHCCCCCCCC |
| 942 | EEERRKQLEKYNNNESEDKRYQRYGRGKGHQF   | -46.77 | 45.2 | HHHHHHHHHHHHHHHHHHHHHHHHHHHHHHCCCCCCCC |
| 237 | EQERRKQLEKESNEKEDKSYQRHWGKGHNP     | -46.77 | 38.7 | HHHHHHHHHHHHHHHHHHHHHHHHHHHHHHCCCCCCCC |
| 825 | EEERRKQLDKESNEKEHKRYQREGRGGHQF     | -46.76 | 38.7 | HHHHHHHHHHHHHHHHHHHHHHHHHHHHHHCCCCCCCC |
| 580 | EEERRKQLDKINNEQEHKRYQREGWGGHYP     | -46.76 | 41.9 | HHHHHHHHHHHHHHHHHHHHHHHHHHHHHHCCCCCCCC |
| 902 | EQQRKQEQEKYNNEWEQKRYQREGRGGHQF     | -46.76 | 35.5 | HHHHHHHHHHHHHHHHHHHHHHHHHHHHHHCCCCCCCC |
| 431 | EEEQRKQEEKRNNEEQKRYQKEGWGGHNP      | -46.76 | 35.5 | HHHHHHHHHHHHHHHHHHHHHHHHHHHHHHCCCCCCCC |
| 161 | EEEQRQEDQRNNEEQQKRYQREGRGGHQF      | -46.75 | 35.5 | HHHHHHHHHHHHHHHHHHHHHHHHHHHHHHCCCCCCCC |
| 361 | EEEQKKQRDQYNNEWEQERYQQQGRGQGHQP    | -46.72 | 38.7 | HHHHHHHHHHHHHHHHHHHHHHHHHHHHHHCCCCCCCC |
| 114 | EQEERKQEQYNNNDWEDRYQREGRKGKGHQF    | -46.70 | 32.3 | HHHHHHHHHHHHHHHHHHHHHHHHHHHHHHCCCCCCCC |
| 016 | EEEQRKQQDDYNHRWEDQRYQREGRKGKGHQF   | -46.68 | 41.9 | HHHHHHHHHHHHHHHHHHHHHHHHHHHHHHCCCCCCCC |
| 604 | QDEEERKQRQYNEEYHEEYQQRKGRGRGHQP    | -46.66 | 25.8 | CHHHHHHHHHHHHHHHHHHHHHHHHHHHHHCCCCCCCC |
| 936 | EEERRKQLDQYKNEFEQYQQKGGKGGHQF      | -46.65 | 35.5 | HHHHHHHHHHHHHHHHHHHHHHHHHHHHHHCCCCCCCC |
| 249 | EQEQRHQQEQKYNNEWEDKRYQREGQGGKGGHQS | -46.65 | 38.7 | HHHHHHHHHHHHHHHHHHHHHHHHHHHHHHCCCCCCCC |
| 563 | EEEEERYQQKYNNEEEDKRYQKEGRGKGHQF    | -46.65 | 41.9 | CHHHHHHHHHHHHHHHHHHHHHHHHHHHHHCCCCCCCC |





|     |                                  |        |      |                                          |
|-----|----------------------------------|--------|------|------------------------------------------|
| 512 | EEEEKKNQDQWKNFEQKYFQQKGQGQKSH    | -46.25 | 32.3 | HHHHHHHHHHHHHHHHHHHHHHHHHHHHHHCCCCCCCC   |
| 574 | EEERKKQLDAYNNRYEQYYQKKGQGQGHQP   | -46.24 | 38.7 | HHHHHHHHHHHHHHHHHHHHHHHHHHHHHHCCCCCCCC   |
| 308 | EEEQRRQQEQRNNEKEDEEYQRRGMGKGHQP  | -46.19 | 38.7 | HHHHHHHHHHHHHHHHHHHHHHHHHHHHHHCCCCCCCC   |
| 437 | EEERKKQQQYNNNEAEDQRYQRYGRGKGHQP  | -46.18 | 41.9 | HHHHHHHHHHHHHHHHHHHHHHHHHHHHHHCCCCCCCC   |
| 655 | EEERKKYQQQKQEEEDKRYQRYGRGKGHQP   | -46.18 | 35.5 | HHHHHHHHHHHHHHHHHHHHHHHHHHHHHHCCCCCCCC   |
| 882 | EEEEKKKQEQESNEKEDKRYQKQGQKGGHQS  | -46.18 | 38.7 | HHHHHHHHHHHHHHHHHHHHHHHHHHHHHHCCCCCCCC   |
| 590 | EEEEKKKREQINNEAEDQRYQREGRGKGHQP  | -46.18 | 45.2 | HHHHHHHHHHHHHHHHHHHHHHHHHHHHHHCCCCCCCC   |
| 932 | EQEERKKLEQISNEKEDQYQKQGWGKGHNP   | -46.18 | 35.5 | CHHHHHHHHHHHHHHHHHHHHHHHHHHHHHCCCCCCCC   |
| 083 | EEERKKQDDFKNRKEDERYQQQGRGKGHQP   | -46.16 | 38.7 | HHHHHHHHHHHHHHHHHHHHHHHHHHHHHHCCCCCCCC   |
| 595 | EEERKKMRQKYNNSEDKRYQRYGKGKGHSS   | -46.16 | 41.9 | HHHHHHHHHHHHHHHHHHHHHHHHHHHHHHCCCCCCCC   |
| 920 | EEERKKMLQKKKNEEDKRYQQQGWGKGHNP   | -46.16 | 41.9 | HHHHHHHHHHHHHHHHHHHHHHHHHHHHHHCCCCCCCC   |
| 525 | EEERKMLQKMKNEEEDQYQRRGKGKGHSH    | -46.16 | 41.9 | HHHHHHHHHHHHHHHHHHHHHHHHHHHHHHCCCCCCCC   |
| 719 | EEQRRQLDQYKNESEQQRYQRYGKGQGDSR   | -46.16 | 45.2 | HHHHHHHHHHHHHHHHHHHHHHHHHHHHHHCCCCCCCC   |
| 728 | DEERKKMLDKKNQEEEQKRYQQYGRGQGHQP  | -46.15 | 41.9 | HHHHHHHHHHHHHHHHHHHHHHHHHHHHHHCCCCCCCC   |
| 998 | EEERKKRQEQEKNEKEDQRYQQQGWGKGHNP  | -46.15 | 35.5 | HHHHHHHHHHHHHHHHHHHHHHHHHHHHHHCCCCCCCC   |
| 761 | EQEERHQEQEYSNEYEDQYQKQGRGKGHQP   | -46.14 | 32.3 | CHHHHHHHHHHHHHHHHHHHHHHHHHHHHHCCCCCCCC   |
| 847 | EQERRHQLEQMKNEKEDQYQRAGRKGHQP    | -46.14 | 35.5 | HHHHHHHHHHHHHHHHHHHHHHHHHHHHHHCCCCCCCC   |
| 618 | EQERRHQLEQQKNEEEDKRYQRYGRGKGHQP  | -46.14 | 35.5 | HHHHHHHHHHHHHHHHHHHHHHHHHHHHHHCCCCCCCC   |
| 457 | EQERRHQLEQWKNEWEDDYQKQEGQKGGHQS  | -46.14 | 35.5 | HHHHHHHHHHHHHHHHHHHHHHHHHHHHHHCCCCCCCC   |
| 218 | EEERRKQLQKIKNEKEDEEYQRRGQKGGHQS  | -46.13 | 41.9 | HHHHHHHHHHHHHHHHHHHHHHHHHHHHHHCCCCCCCC   |
| 061 | EEERRKQLQKINNEAEDKRYQREGRGKGHQP  | -46.13 | 48.4 | HHHHHHHHHHHHHHHHHHHHHHHHHHHHHHCCCCCCCC   |
| 297 | EEERRKQLQKYKNEFEDKYQQQKGGQKGGHSH | -46.13 | 41.9 | HHHHHHHHHHHHHHHHHHHHHHHHHHHHHHCCCCCCCC   |
| 944 | EEERRKQLEQQNNEKEDQRYQREGRGKGHQP  | -46.12 | 41.9 | HHHHHHHHHHHHHHHHHHHHHHHHHHHHHHCCCCCCCC   |
| 915 | EEEQRKQDQYNNNEWEQEEYQRKGRGQGNQN  | -46.11 | 35.5 | HHHHHHHHHHHHHHHHHHHHHHHHHHHHHHCCCCCCCC   |
| 739 | EQQQRKYEEQRNNNEEDERYQRYGQKGGHQS  | -46.09 | 35.5 | HHHHHHHHHHHHHHHHHHHHHHHHHHHHHHCCCCCCCC   |
| 135 | EEERKLRDQINNEKEQEEYQRRGKGQGHNNH  | -46.09 | 35.5 | HHHHHHHHHHHHHHHHHHHHHHHHHHHHHHCCCCCCCC   |
| 378 | EEERKLRDQINNEKEQEEYQRYGRGQGHQP   | -46.09 | 35.5 | HHHHHHHHHHHHHHHHHHHHHHHHHHHHHHCCCCCCCC   |
| 817 | EQEERHQEQQRNNEKEDEEYQRRGWGKGHNP  | -46.08 | 35.5 | CHHHHHHHHHHHHHHHHHHHHHHHHHHHHHCCCCCCCC   |
| 315 | EEERKKMLDQINNEKEHEEYQRRGQKGGHQS  | -46.07 | 38.7 | HHHHHHHHHHHHHHHHHHHHHHHHHHHHHHCCCCCCCC   |
| 443 | EEEQRKQYQKESNEKEDEEYQRKGRGKGHQP  | -46.06 | 38.7 | HHHHHHHHHHHHHHHHHHHHHHHHHHHHHHCCCCCCCC   |
| 853 | EEEQRKQYQKESNEKEDKRYQREGKGKGHQP  | -46.06 | 38.7 | HHHHHHHHHHHHHHHHHHHHHHHHHHHHHHCCCCCCCC   |
| 796 | EEERKYQQQKENEREEDQYQKGRGKGHQP    | -46.05 | 35.5 | CHHHHHHHHHHHHHHHHHHHHHHHHHHHHHCCCCCCCC   |
| 270 | EEERKKQDQFSNEFEQQYYQKQGGQKGGHSH  | -46.04 | 35.5 | HHHHHHHHHHHHHHHHHHHHHHHHHHHHHHCCCCCCCC   |
| 136 | DEERKKMLEQIKNEAEDQRYQRYGWGKGHNP  | -46.03 | 41.9 | HHHHHHHHHHHHHHHHHHHHHHHHHHHHHHCCCCCCCC   |
| 098 | EEERKKMLEQKNNEEEDQRYQRYGQKGGHQS  | -46.03 | 41.9 | HHHHHHHHHHHHCHHHHHHHHHHHHHHHHHHHCCCCCCCC |
| 022 | EQEKRKMLEQWKNEWEDDYQKQGGQKGGHQS  | -46.03 | 35.5 | HHHHHHHHHHHHHHHHHHHHHHHHHHHHHHCCCCCCCC   |
| 323 | EQEKRHQLEQMKNDKEDREYQRSKGKGGHSS  | -46.02 | 35.5 | HHHHHHHHHHHHHHHHHHHHHHHHHHHHHHCCCCCCCC   |
| 576 | EQERRKQLEQINNDADRYYQYQYKGGHSS    | -46.02 | 38.7 | HHHHHHHHHHHHHHHHHHHHHHHHHHHHHHCCCCCCCC   |
| 775 | EEERKKEQQRNNEEDQRYQQYGRGKGHQP    | -46.01 | 35.5 | HHHHHHHHHHHHHHHHHHHHHHHHHHHHHHCCCCCCCC   |
| 823 | EEERKKQLEQESNEKEDQYQKQGGQKGGHQS  | -46.00 | 41.9 | HHHHHHHHHHHHHHHHHHHHHHHHHHHHHHCCCCCCCC   |
| 490 | EEERKKQLEQINNEAEDQRYQREGGWGKGHYP | -46.00 | 48.4 | HHHHHHHHHHHHHHHHHHHHHHHHHHHHHHCCCCCCCC   |
| 946 | EEERKKQLEQWKNEWEDDYQKQGGQKGGHSH  | -46.00 | 41.9 | HHHHHHHHHHHHHHHHHHHHHHHHHHHHHHCCCCCCCC   |
| 392 | EEERKKQLEQINNEAEDKRYQREGKGKGHSS  | -46.00 | 45.2 | HHHHHHHHHHHHHHHHHHHHHHHHHHHHHHCCCCCCCC   |
| 621 | EEERKKQLEQYKNEHEDRRYQEQGKGKGHSS  | -46.00 | 38.7 | HHHHHHHHHHHHHHHHHHHHHHHHHHHHHHCCCCCCCC   |
| 071 | EQEERKYQEOKNNEEEDERYQRYGQKGGHQS  | -46.00 | 35.5 | CHHHHHHHHHHHHHHHHHHHHHHHHHHHHHCCCCCCCC   |
| 288 | EEERKKQDKIKNEKEQEEYQRRGQKGGHQS   | -45.99 | 35.5 | HHHHHHHHHHHHHHHHHHHHHHHHHHHHHHCCCCCCCC   |
| 029 | EEERKKRQEQENNDKEDRRYQREGQKGGHSS  | -45.99 | 38.7 | HHHHHHHHHHHHCHHHHHHHHHHHHHHHHHHHCCCCCCCC |
| 804 | EEERRKQLQKWKNEYEQKSYQREGKQGGHNNH | -45.99 | 35.5 | HHHHHHHHHHHHHHHHHHHHHHHHHHHHHHCCCCCCCC   |
| 465 | EQEERKKQEQINNEAEDKRYQRYGQKGGHQS  | -45.98 | 38.7 | HHHHHHHHHHHHHHHHHHHHHHHHHHHHHHCCCCCCCC   |
| 558 | EEEEKRRQDQKNEKEQKRYQREGRGQGQGHQP | -45.97 | 38.7 | CHHHHHHHHHHHHHHHHHHHHHHHHHHHHHCCCCCCCC   |
| 508 | EEERKKRQEQFSNEFEDQYQQKQGGQKGGHSH | -45.97 | 38.7 | HHHHHHHHHHHHHHHHHHHHHHHHHHHHHHCCCCCCCC   |
| 470 | EQEERKRQEQYNNYEDEEYQKRGKGKGHQP   | -45.97 | 35.5 | HHHHHHHHHHHHHHHHHHHHHHHHHHHHHHCCCCCCCC   |
| 964 | EQEERHQEQYNNNEWEDKRYQREGRGKGHQP  | -45.95 | 35.5 | CHHHHHHHHHHHHHHHHHHHHHHHHHHHHHCCCCCCCC   |
| 233 | EEERKKRQDQEKNEKEHQRYQREGRGQGHQP  | -45.93 | 32.3 | HHHHHHHHHHHHHHHHHHHHHHHHHHHHHHCCCCCCCC   |
| 497 | EEERKKRQEQRNNEEHHQRYQREGKQGGHSH  | -45.93 | 32.3 | HHHHHHHHHHHHHHHHHHHHHHHHHHHHHHCCCCCCCC   |
| 133 | EEEQKQREQYNNRYEHEEYQKQGGQGGHQP   | -45.93 | 32.3 | HHHHHHHHHHHHHHHHHHHHHHHHHHHHHHCCCCCCCC   |
| 072 | EEEEKKQREQESNEKEDERYQREGQKGGHQS  | -45.93 | 38.7 | HHHHHHHHHHHHHHHHHHHHHHHHHHHHHHCCCCCCCC   |
| 564 | EQEERKQREQENNEKEDRRYQRYGWGKGHNP  | -45.93 | 35.5 | HHHHHHHHHHHHHHHHHHHHHHHHHHHHHHCCCCCCCC   |
| 482 | EQEERKQREQWKQDWEQQYYQQQGGQGGHQS  | -45.93 | 22.6 | HHHHHHHHHHHHHHHHHHHHHHHHHHHHHHCCCCCCCC   |
| 252 | EEEQRKYEDQRNQESEQQRYQREGKQGGHQS  | -45.93 | 35.5 | CHHHHHHHHHHHHHHHHHHHHHHHHHHHHHCCCCCCCC   |
| 634 | EEEQRKYEDQRSQEEQKRYQREGRGQGHQP   | -45.93 | 32.3 | CHHHHHHHHHHHHHHHHHHHHHHHHHHHHHCCCCCCCC   |
| 899 | EEEEKQYEQYSNEWEDEEYQKGRGKGHQP    | -45.92 | 38.7 | CHHHHHHHHHHHHHHHHHHHHHHHHHHHHHCCCCCCCC   |
| 250 | EEEEKKKREQYNNNEAEDKRYQREGKGKGDSR | -45.92 | 51.6 | CHHHHHHHHHHHHHHHHHHHHHHHHHHHHHCCCCCCCC   |
| 108 | EQEERKQREQESNRKEDERYQREGKGKGHNP  | -45.90 | 29.0 | HHHHHHHHHHHHHHHHHHHHHHHHHHHHHHCCCCCCCC   |
| 026 | EQEERKQEQRSEKNEDEEYQRYGRGQGHQP   | -45.90 | 25.8 | HHHHHHHHHHHHHHHHHHHHHHHHHHHHHHCCCCCCCC   |
| 500 | EEERKITQQQLNNEKEDEEYQRKGRGKGDSR  | -45.89 | 45.2 | HHHHHHHHHHHHHHHHHHHHHHHHHHHHHHCCCCCCCC   |
| 219 | EEERKYQQQKNNEEEDERYQKGRGKGHQP    | -45.88 | 38.7 | CHHHHHHHHHHHHHHHHHHHHHHHHHHHHHCCCCCCCC   |

|     |                                  |        |      |                                            |
|-----|----------------------------------|--------|------|--------------------------------------------|
| 896 | EEEEERKYQQQKNNEEEDERYQQQGRGKGHP  | -45.88 | 38.7 | CHHHHHHHHHHHHHHHHHHHHHHHHHHHHHHHHCCCCCCC   |
| 082 | EEEEERKYQQQKNNEEEDQRYQKQGWGKGHNP | -45.88 | 38.7 | CHHHHHHHHHHHHHHHHHHHHHHHHHHHHHHHHCCCCCCC   |
| 117 | EEERKYQQQKNNEEEDQRYQKQGWGKGHNP   | -45.88 | 41.9 | HHHHHHHHHHHHHCHHHHHHHHHHHHHHHHHHHHHCCCCCCC |
| 759 | EEEQQRHYEQQYSNEWEDQRYQKQGRGKGHP  | -45.88 | 38.7 | HHHHHHHHHHHHHHHHHHHHHHHHHHHHHHHHHCCCCCCC   |
| 568 | EQQEQRHQEQYSNEWEDQRYQKQGRGKGHP   | -45.88 | 32.3 | HHHHHHHHHHHHHHHHHHHHHHHHHHHHHHHHHCCCCCCC   |
| 441 | EEEEERKQDQYNNESEQRYQRYGRGQGHP    | -45.87 | 35.5 | HHHHHHHHHHHHHCHHHHHHHHHHHHHHHHHHHHHCCCCCCC |
| 013 | EEEEERKQKKKQEEEQKRYQREGRGQGHP    | -45.86 | 32.3 | HHHHHHHHHHHHHHHHHHHHHHHHHHHHHHHHHCCCCCCC   |
| 692 | EEEEERKRQQFSDNYEDKRYQQQGRGKGHP   | -45.85 | 38.7 | HHHHHHHHHHHHHHHHHHHHHHHHHHHHHHHHHCCCCCCC   |
| 182 | EEEEERKQDQYNNESEQRYQRYGRGQGHP    | -45.79 | 32.3 | HHHHHHHHHHHHHHHHHHHHHHHHHHHHHHHHHCCCCCCC   |
| 306 | EEEEERKFQQYKNEHEQRYQQQGWGKGHP    | -45.78 | 38.7 | CHHHHHHHHHHHHHHHHHHHHHHHHHHHHHHHHCCCCCCC   |
| 594 | EEEEERKQLEQESNEKEDEERYQQQGWGKGHP | -45.77 | 41.9 | HHHHHHHHHHHHHHHHHHHHHHHHHHHHHHHHHCCCCCCC   |
| 074 | EEEEKRFLDKYKNEEYQERYQKRGKGHP     | -45.77 | 41.9 | HHHHHHHHHHHHHHHHHHHHHHHHHHHHHHHHHCCCCCCC   |
| 842 | EQEERHQEQQRSNEQEDKRYQRYGRGKGHP   | -45.75 | 32.3 | CHHHHHHHHHHHHHHHHHHHHHHHHHHHHHHHHCCCCCCC   |
| 883 | EEEQRKEEQKNNSEDRRYQREGQGKGHP     | -45.74 | 35.5 | HHHHHHHHHHHHHCHHHHHHHHHHHHHHHHHHHHHCCCCCCC |
| 312 | EEEQRKEEQRRNDKEQKRYQREGRGQGHP    | -45.73 | 25.8 | HHHHHHHHHHHHHHHHHHHHHHHHHHHHHHHHHCCCCCCC   |
| 566 | EEERRKQLEQESNDKEDRYFYQYQYGGKGHP  | -45.73 | 32.3 | HHHHHHHHHHHHHHHHHHHHHHHHHHHHHHHHHCCCCCCC   |
| 097 | EEEEERKRQEYSNEYEDEEYQKRGKGHP     | -45.72 | 35.5 | HHHHHHHHHHHHHHHHHHHHHHHHHHHHHHHHHCCCCCCC   |
| 706 | EEERKQLQIISQEKDEEYQRYGKKGHP      | -45.66 | 38.7 | HHHHHHHHHHHHHHHHHHHHHHHHHHHHHHHHHCCCCCCC   |
| 181 | EEEEKKQEIQINNEEDKRYQREGRGKGHP    | -45.66 | 38.7 | HHHHHHHHHHHHHCHHHHHHHHHHHHHHHHHHHHHCCCCCCC |
| 060 | EEEKRWLQQLSNEKEDEQYQQRGQKKGHP    | -45.65 | 38.7 | HHHHHHHHHHHHHHHHHHHHHHHHHHHHHHHHHCCCCCCC   |
| 454 | EEEEERKYQQYNNEWEDKRYQREGRGKGHP   | -45.65 | 38.7 | CHHHHHHHHHHHHHHHHHHHHHHHHHHHHHHHHCCCCCCC   |
| 132 | EEERKYLDDQYNNDYQRYQRYGRGQGHP     | -45.64 | 35.5 | HHHHHHHHHHHHHHHHHHHHHHHHHHHHHHHHHCCCCCCC   |
| 686 | EEERKWLDDKLSNEKEQKRYQRQGRGQGHP   | -45.63 | 38.7 | HHHHHHHHHHHHHHHHHHHHHHHHHHHHHHHHHCCCCCCC   |
| 043 | EQEKHQEQQRNEEEDQRYQREGQGKGHP     | -45.62 | 35.5 | HHHHHHHHHHHHHHHHHHHHHHHHHHHHHHHHHCCCCCCC   |
| 785 | EEEEERKYDQKNNEEEQRYQKQGRGQGHP    | -45.62 | 35.5 | CHHHHHHHHHHHHCHHHHHHHHHHHHHHHHHHHHHCCCCCCC |
| 106 | EEEEERKYDQYNNEEYQRYQRYGRGQGHP    | -45.62 | 35.5 | CHHHHHHHHHHHHHHHHHHHHHHHHHHHHHHHHCCCCCCC   |
| 197 | EEEQKQYEDQRNNEEQQYQYQYQYGGKHP    | -45.62 | 38.7 | CHHHHHHHHHHHHCHHHHHHHHHHHHHHHHHHHHHCCCCCCC |
| 971 | EEEEERKKEKESNEKEDKRYQREGGKKGHP   | -45.60 | 38.7 | HHHHHHHHHHHHHHHHHHHHHHHHHHHHHHHHHCCCCCCC   |
| 448 | EEEEERKQEQRSNEKEQEYQRRGQGHP      | -45.56 | 29.0 | HHHHHHHHHHHHHHHHHHHHHHHHHHHHHHHHHCCCCCCC   |
| 885 | EEEEKKQEKYKNEEYQERYQKRGKGHP      | -45.55 | 35.5 | HHHHHHHHHHHHHHHHHHHHHHHHHHHHHHHHHCCCCCCC   |
| 851 | EEEEERKQQQINNDKEDREYQRRGKGHP     | -45.55 | 35.5 | HHHHHHHHHHHHHHHHHHHHHHHHHHHHHHHHHCCCCCCC   |
| 475 | EEEQKQLDQYINNEEYQERYQRYGRGQGHP   | -45.55 | 38.7 | HHHHHHHHHHHHHHHHHHHHHHHHHHHHHHHHHCCCCCCC   |
| 295 | EEERRKQLEKINNEEHKRYQQRGQKGSGR    | -45.54 | 38.7 | HHHHHHHHHHHHHHHHHHHHHHHHHHHHHHHHHCCCCCCC   |
| 892 | EEEEERKRQDQYNNEEYQRYQRYGRGQNS    | -45.54 | 38.7 | HHHHHHHHHHHHHHHHHHHHHHHHHHHHHHHHHCCCCCCC   |
| 466 | EEEEERKQQQENNEKEDQRYQREGGKKGHP   | -45.54 | 38.7 | HHHHHHHHHHHHHHHHHHHHHHHHHHHHHHHHHCCCCCCC   |
| 870 | EEEEERKQQQINNEADKRYQREGGKKGHP    | -45.54 | 41.9 | HHHHHHHHHHHHHHHHHHHHHHHHHHHHHHHHHCCCCCCC   |
| 755 | EEEEERKQQQINNEEDKRYQREGRGKGHP    | -45.54 | 38.7 | HHHHHHHHHHHHHCHHHHHHHHHHHHHHHHHHHHHCCCCCCC |
| 524 | EEEEERKQQQINNEEDQRYQREGQGKGHP    | -45.54 | 38.7 | HHHHHHHHHHHHHHHHHHHHHHHHHHHHHHHHHCCCCCCC   |
| 025 | EEEEERKQQQINNEEEDQRYQREGGKKGHP   | -45.54 | 35.5 | HHHHHHHHHHHHHHHHHHHHHHHHHHHHHHHHHCCCCCCC   |
| 625 | EEEEERKRQDKENNEREQRYQREGQGKGHP   | -45.54 | 38.7 | HHHHHHHHHHHHHHHHHHHHHHHHHHHHHHHHHCCCCCCC   |
| 210 | EQERRKQLEQINNDADKRYQKQKKGKGS     | -45.53 | 45.2 | HHHHHHHHHHHHHHHHHHHHHHHHHHHHHHHHHCCCCCCC   |
| 950 | EEEEKKFRDQYNNEEYQERYQKRGQGHP     | -45.52 | 41.9 | CHHHHHHHHHHHHHHHHHHHHHHHHHHHHHHHHCCCCCCC   |
| 629 | EEERKFLDQYKNEWEQRYQRYGRGQGHP     | -45.52 | 38.7 | HHHHHHHHHHHHHHHHHHHHHHHHHHHHHHHHHCCCCCCC   |
| 871 | EEEQRFEDQYRNEWEQRYQRYGRGQGHYP    | -45.52 | 35.5 | CHHHHHHHHHHHHHHHHHHHHHHHHHHHHHHHHCCCCCCC   |
| 552 | EEERKMLDKWKNWEQYQYQYQYQYQYQYQ    | -45.52 | 38.7 | HHHHHHHHHHHHHHHHHHHHHHHHHHHHHHHHHCCCCCCC   |
| 953 | EEERRKQLEQINNDADRYQRYGKKGHP      | -45.50 | 41.9 | HHHHHHHHHHHHHHHHHHHHHHHHHHHHHHHHHCCCCCCC   |
| 645 | EEERRKQLDAINNRKEDEYQRRGKKGHP     | -45.48 | 48.4 | HHHHHHHHHHHHHHHHHHHHHHHHHHHHHHHHHCCCCCCC   |
| 269 | EEERKQEQQRNNEEQQRYQRYGRGQGHP     | -45.43 | 32.3 | HHHHHHHHHHHHHHHHHHHHHHHHHHHHHHHHHCCCCCCC   |
| 056 | EEEQRKEEQYRQEWQERYQRYGRGQGHP     | -45.41 | 29.0 | HHHHHHHHHHHHHHHHHHHHHHHHHHHHHHHHHCCCCCCC   |
| 615 | EEEEERKMRDQYNQEQYQYQYQYQYQYQYQ   | -45.41 | 35.5 | HHHHHHHHHHHHHHHHHHHHHHHHHHHHHHHHHCCCCCCC   |
| 048 | EEERRKQLEQYKNEWEDEYQRYQRYGRGHP   | -45.41 | 38.7 | HHHHHHHHHHHHHHHHHHHHHHHHHHHHHHHHHCCCCCCC   |
| 633 | EEEEERKQQQRNEEEDKRYQRYGRGQGHYP   | -45.41 | 29.0 | HHHHHHHHHHHHHHHHHHHHHHHHHHHHHHHHHCCCCCCC   |
| 681 | EEERYRWLDQKNEEQQRYQRYGRGQGHP     | -45.40 | 35.5 | HHHHHHHHHHHHHHHHHHHHHHHHHHHHHHHHHCCCCCCC   |
| 921 | EQEERKWRDQKNNEEQRYQRYGKKGHP      | -45.40 | 32.3 | CHHHHHHHHHHHHCHHHHHHHHHHHHHHHHHHHHHCCCCCCC |
| 207 | EEEEERKMRQYNNEEYQRYQRYGRGQGHP    | -45.39 | 38.7 | HHHHHHHHHHHHHHHHHHHHHHHHHHHHHHHHHCCCCCCC   |
| 904 | EEERKMLDQYKNEEYQRYQRYGRGQGHP     | -45.39 | 38.7 | HHHHHHHHHHHHHHHHHHHHHHHHHHHHHHHHHCCCCCCC   |
| 427 | EEERKQLDQEKQEQERYQRYGRGQGHSS     | -45.39 | 35.5 | HHHHHHHHHHHHHHHHHHHHHHHHHHHHHHHHHCCCCCCC   |
| 124 | EEERKQLDQKNNEEDKRYQREGGKKGHP     | -45.37 | 45.2 | HHHHHHHHHHHHHHHHHHHHHHHHHHHHHHHHHCCCCCCC   |
| 099 | EEERRKQEQQLRNEEEDSRYYQYQYQYQYQ   | -45.37 | 35.5 | HHHHHHHHHHHHHHHHHHHHHHHHHHHHHHHHHCCCCCCC   |
| 111 | EEERRKQLQIKNKEDEYQRYQRYGRGQGHP   | -45.37 | 38.7 | HHHHHHHHHHHHHHHHHHHHHHHHHHHHHHHHHCCCCCCC   |
| 551 | EEERRKQLQIKNKEDEYQRYQRYGRGQGHP   | -45.37 | 38.7 | HHHHHHHHHHHHHHHHHHHHHHHHHHHHHHHHHCCCCCCC   |
| 643 | EEERRKQLQIKNNEEDKRYQREGGKKGHP    | -45.37 | 41.9 | HHHHHHHHHHHHHHHHHHHHHHHHHHHHHHHHHCCCCCCC   |
| 042 | EEERRKQLQYQYQYQYQYQYQYQYQYQYQ    | -45.37 | 38.7 | HHHHHHHHHHHHHHHHHHHHHHHHHHHHHHHHHCCCCCCC   |
| 995 | EEERRKQLQYQYQYQYQYQYQYQYQYQYQ    | -45.37 | 38.7 | HHHHHHHHHHHHHHHHHHHHHHHHHHHHHHHHHCCCCCCC   |
| 708 | EEEEERKQESNEKEDEYQRYQRYGRGHP     | -45.29 | 35.5 | HHHHHHHHHHHHHHHHHHHHHHHHHHHHHHHHHCCCCCCC   |
| 965 | EEEQRKHQEQSNEKEDKRYQREGRGKGHP    | -45.29 | 35.5 | HHHHHHHHHHHHHHHHHHHHHHHHHHHHHHHHHCCCCCCC   |
| 703 | EEERKMLDQYKHEWEQERYQRYGRGQGHP    | -45.28 | 38.7 | HHHHHHHHHHHHHHHHHHHHHHHHHHHHHHHHHCCCCCCC   |



|     |                                    |        |      |                                |
|-----|------------------------------------|--------|------|--------------------------------|
| 585 | EQEERKKQEQQNNEREQEYQRRGRGQGHQP     | -44.55 | 29.0 | HHHHHHHHHHHHHHHHHHHHHHHCCCCC   |
| 789 | EEERKKQLDDYKNRWEDEEYQQRKGRGKGHQP   | -44.54 | 41.9 | HHHHHHHHHHHHHHHHHHHHHHHCCCCC   |
| 316 | EQERRHOLEKYKNEYEDEEYQQRKGRGKGHQP   | -44.53 | 38.7 | HHHHHHHHHHHHHHHHHHHHHHHCCCCC   |
| 554 | EEEQRREQEKRNEKEQKYQQKGGQGHNH       | -44.53 | 32.3 | HHHHHHHHHHHHHHHHHHHHHHHCCCCC   |
| 787 | EEEERKKEEQRNNEEQQRYQRYGKGQGHQP     | -44.50 | 29.0 | HHHHHHHHHHHHHHHHHHHHHHHCCCCC   |
| 996 | EEEKRKLLQIIEERKRDEEYQRRGRGKGHQP    | -44.49 | 32.3 | HHHHHHHHHHHHHHHHHHHHHHHCCCCC   |
| 158 | EEQERRKQEYNNRWEDEYQREGWGKGHNP      | -44.45 | 38.7 | HHHHHHHHHHHHHHHHHHHHHHHCCCCC   |
| 640 | EQERRHLEQISNEKEDDEYQRRGQKGHQS      | -44.43 | 35.5 | HHHHHHHHHHHHHHHHHHHHHHHCCCCC   |
| 531 | EEEERKWEKKNNEEQRKRYQRYGRGQGHQP     | -44.40 | 35.5 | CHHHHHHHHHHHHHHHHHHHHHHCCCCC   |
| 533 | EEEARKSEQKYRNEAEQKRYQREGKGGQGHNH   | -44.39 | 38.7 | HHHHHHHHHHHHHHHHHHHHHHHCCCCC   |
| 806 | EEEQRKQEQQYRNDSEQRRYQRYGQGQGHQS    | -44.39 | 25.8 | HHHHHHHHHHHHHHHHHHHHHHHCCCCC   |
| 925 | EEEKRKQEDDRNNNEEQRYQRYGKGQGHQP     | -44.38 | 32.3 | HHHHHHHHHHHHHHHHHHHHHHHCCCCC   |
| 172 | EEEKRKQEQQRNNEKEQEYQRRGQGGQGHQS    | -44.38 | 32.3 | HHHHHHHHHHHHHHHHHHHHHHHCCCCC   |
| 364 | EEEERKKEQQREERDEEYQRRGWGKGHNP      | -44.37 | 32.3 | HHHHHHHHHHHHHHHHHHHHHHHCCCCC   |
| 397 | EEEQRKQQQYSNRFEEYQKGGQGGHSH        | -44.35 | 25.8 | HHHHHHHHHHHHHHHHHHHHHHHCCCCC   |
| 911 | EEEQRKQQQYSNESEQERYQQQGGWGQGHNP    | -44.31 | 29.0 | HHHHHHHHHHHHCHHHHHHHHHHHHCCCCC |
| 326 | EQEQRHYEEQRNNEEDQRYQRYGKGKGHSS     | -44.28 | 35.5 | HHHHHHHHHHHHHHHHHHHHHHHCCCCC   |
| 265 | EEEEKKRQEKEKSNKEDEEYQQRKGRGQGHQP   | -44.25 | 35.5 | HHHHHHHHHHHHHHHHHHHHHHHCCCCC   |
| 493 | EEQRKQLDDIKNRKEDEEYQRRGWGKGHNP     | -44.25 | 41.9 | HHHHHHHHHHHHHHHHHHHHHHHCCCCC   |
| 452 | EQEERHQEQYNNESEHERYQQQGGQGGHSS     | -44.23 | 29.0 | CHHHHHHHHHHHHHHHHHHHHHHCCCCC   |
| 057 | EEERRQLEKIKNEKEDDEYQRYGKGKGHNS     | -44.21 | 41.9 | HHHHHHHHHHHHHHHHHHHHHHHCCCCC   |
| 578 | EEERRKQLDQESNEKEQKRYQREGQGGQGHSS   | -44.21 | 35.5 | HHHHHHHHHHHHHHHHHHHHHHHCCCCC   |
| 504 | EEEQKKMYEKINNEKEQEYQRRGRGQGHQP     | -44.20 | 38.7 | HHHHHHHHHHHHHHHHHHHHHHHCCCCC   |
| 654 | EEERRKQLQKISNEEHKRYQREGKGGQGHSH    | -44.18 | 35.5 | HHHHHHHHHHHHCHHHHHHHHHHHHCCCCC |
| 547 | EEERRKQLEQISNEEHKRKQREGKGSKSR      | -44.18 | 32.3 | HHHHHHHHHHHHHHHHHHHHHHHCCCCC   |
| 624 | EEEKKKMLEKINNEAEQKRYQREGRGQGGQGHQP | -44.13 | 45.2 | HHHHHHHHHHHHHHHHHHHHHHHCCCCC   |
| 310 | EEEERRYQEYNNDYEDREYQQRKGRGKGHQP    | -44.12 | 35.5 | CHHHHHHHHHHHHHHHHHHHHHHCCCCC   |
| 852 | EEERRKQLQESNEKEHEQKQQRGQGGKQS      | -44.10 | 29.0 | HHHHHHHHHHHHHHHHHHHHHHHCCCCC   |
| 171 | EEEEKKREHYNNRWEDEYQQQGQGGKGHQS     | -44.07 | 38.7 | HHHHHHHHHHHHHHHHHHHHHHHCCCCC   |
| 895 | EEEERKFQQQFNNEFEHEYYQQKGGQGGHNP    | -44.06 | 38.7 | CHHHHHHHHHHHHHHHHHHHHHHCCCCC   |
| 730 | EQERRHOLEQIKQEKEDEEYQRRGRGKGHQP    | -44.06 | 35.5 | HHHHHHHHHHHHHHHHHHHHHHHCCCCC   |
| 906 | EQERRHOLEQWKQWEDEEYQQRKGGQGGHNP    | -44.06 | 35.5 | HHHHHHHHHHHHHHHHHHHHHHHCCCCC   |
| 858 | EQEERHWQEQQMKNEKEDEEYQRRGWGKGHNP   | -44.06 | 32.3 | CHHHHHHHHHHHHHHHHHHHHHHCCCCC   |
| 151 | EEEQRKYEEKRNNEEQKRYQREGWGQGHNP     | -44.03 | 35.5 | CHHHHHHHHHHHHHHHHHHHHHHCCCCC   |
| 987 | EQEKRKLEQIENEREQEQRYQREGRGQGHQP    | -44.01 | 29.0 | HHHHHHHHHHHHHHHHHHHHHHHCCCCC   |
| 544 | EEEKRKLLQQIKNEEQRFQRYGRGQGGKQN     | -44.01 | 29.0 | HHHHHHHHHHHHHHHHHHHHHHHCCCCC   |
| 721 | EEERKKEQKYRNEAEQKRYQREGKGGQGHSS    | -43.97 | 35.5 | HHHHHHHHHHHHHHHHHHHHHHHCCCCC   |
| 109 | EEERRKQLQKESQEKEQKRYQREGRGQGHQP    | -43.95 | 35.5 | HHHHHHHHHHHHHHHHHHHHHHHCCCCC   |
| 537 | EQEQRKEEKKRNEQEKRYQREGRGQGHQP      | -43.93 | 29.0 | HHHHHHHHHHHHHHHHHHHHHHHCCCCC   |
| 236 | EEEERKQEYNNNEYEQEYQQRKGRGQGGHQP    | -43.90 | 32.3 | HHHHHHHHHHHHHHHHHHHHHHHCCCCC   |
| 481 | EEEQRKQQQSSNEEQRYQRYGKGQGGDSR      | -43.88 | 35.5 | HHHHHHHHHHHHHHHHHHHHHHHCCCCC   |
| 714 | EEEERKQQQYNNNEYEQEYQRQGRGQGGHQP    | -43.86 | 32.3 | HHHHHHHHHHHHHHHHHHHHHHHCCCCC   |
| 958 | EEQERKKQQQINNEKEDEEYQRRGKGKGDSP    | -43.86 | 48.4 | HHHHHHHHHHHHHHHHHHHHHHHCCCCC   |
| 836 | EQEERKYQEYFNNRFEQEYQKGGQGGHQP      | -43.84 | 29.0 | CHHHHHHHHHHHHHHHHHHHHHHCCCCC   |
| 485 | EEERRKQLQAEKNRKDEYQRYQREGKGGHSH    | -43.83 | 35.5 | HHHHHHHHHHHHHHHHHHHHHHHCCCCC   |
| 756 | EEEERKQQQINNEKEHQEQYKGGQGGHQS      | -43.82 | 32.3 | HHHHHHHHHHHHHHHHHHHHHHHCCCCC   |
| 275 | EQEKRHMLEQKNNEEDKRYQREGRGKGHQP     | -43.79 | 38.7 | HHHHHHHHHHHHHHHHHHHHHHHCCCCC   |
| 569 | EQERRHOLEQESNDKEDRYQREGRGKGHQP     | -43.78 | 32.3 | HHHHHHHHHHHHCHHHHHHHHHHHHCCCCC |
| 916 | EEEQRKFEEQYRNDAEQRYQREGRGQGGHQP    | -43.77 | 32.3 | HHHHHHHHHHHHHHHHHHHHHHHCCCCC   |
| 324 | EQEKRHMLEQINNRAEDERYQREGKGGKGHNP   | -43.77 | 38.7 | HHHHHHHHHHHHHHHHHHHHHHHCCCCC   |
| 280 | EQERRHOLEQSSNEEEDERYQQQGGWGKGHNP   | -43.77 | 35.5 | HHHHHHHHHHHHHHHHHHHHHHHCCCCC   |
| 694 | EQERRHOLEQYKNEWEDDEYQQRKGRGKGHQP   | -43.77 | 35.5 | HHHHHHHHHHHHHHHHHHHHHHHCCCCC   |
| 248 | EQERRHOLEQYSNEYEDKQYQKEGKGKGHNP    | -43.77 | 35.5 | HHHHHHHHHHHHHHHHHHHHHHHCCCCC   |
| 546 | EQEERHKQEYFNNRFEDEYQKYGGQGGHSH     | -43.74 | 32.3 | HHHHHHHHHHHHHHHHHHHHHHHCCCCC   |
| 344 | EEEQKKQEYQYRNEYEQEYQQRKGRGQGGDSR   | -43.71 | 38.7 | HHHHHHHHHHHHHHHHHHHHHHHCCCCC   |
| 834 | EEEQRKLYQLNNEKEQKRYQREGRGQGGHQP    | -43.69 | 32.3 | HHHHHHHHHHHHHHHHHHHHHHHCCCCC   |
| 088 | EEERRKLLQQISNEKEQEYQRRGWGQGGHYP    | -43.69 | 32.3 | HHHHHHHHHHHHHHHHHHHHHHHCCCCC   |
| 354 | EQEERHQREQSSNEREQKRYQREGRGQGGHQP   | -43.67 | 25.8 | CHHHHHHHHHHHHHHHHHHHHHHCCCCC   |
| 410 | EQERRHOLEQISNEEEDRYQREGKGGHSH      | -43.64 | 35.5 | HHHHHHHHHHHHHHHHHHHHHHHCCCCC   |
| 523 | EEERKQLEQIKQEAQQRYQREGKGGQGGHSS    | -43.64 | 38.7 | HHHHHHHHHHHHHHHHHHHHHHHCCCCC   |
| 700 | EEERKQLEKIKNEKEQKEYQRSRGGQGGHQP    | -43.64 | 41.9 | HHHHHHHHHHHHHHHHHHHHHHHCCCCC   |
| 330 | EQERRHOLEQISNEKEDEYQQQGRGKGHQP     | -43.62 | 35.5 | HHHHHHHHHHHHHHHHHHHHHHHCCCCC   |
| 023 | EQQRHQQEYRNNEEQRYQRRGRGQGGHQP      | -43.61 | 29.0 | HHHHHHHHHHHHHHHHHHHHHHHCCCCC   |
| 961 | EQEQRHQEQWRNEYEQEYQQRKGRGQGGHQP    | -43.61 | 25.8 | HHHHHHHHHHHHHHHHHHHHHHHCCCCC   |
| 298 | EEERKRQDQENNEREQKRYQREGKGGQGGDSR   | -43.58 | 41.9 | HHHHHHHHHHHHHHHHHHHHHHHCCCCC   |
| 768 | EEEKRRLQESNDKEDRYQREGWGKGHNP       | -43.53 | 35.5 | HHHHHHHHHHHHHHHHHHHHHHHCCCCC   |
| 704 | EQQRHKQEYINNEKEDEEYQRRGRGKGHQP     | -43.50 | 38.7 | CHHHHHHHHHHHHHHHHHHHHHHCCCCC   |

|     |                                   |        |      |                                           |
|-----|-----------------------------------|--------|------|-------------------------------------------|
| 642 | EEEEKMRQKFNNEYEQKSYQREGRGQGHQP    | -43.50 | 38.7 | HHHHHHHHHHHHHHHHHHHHHHHHHHHHHHHHHCCCCCCC  |
| 024 | EEEKRMMLQKKNNEEQKRYQRYGRGQGHQP    | -43.50 | 38.7 | HHHHHHHHHHHCCSHHHHHHHHHHHHHHHHHHHHHHCCCCC |
| 628 | EQEERHRLQEMKNEKEDEEYQRRGRGKQGHQP  | -43.48 | 35.5 | HHHHHHHHHHHHHHHHHHHHHHHHHHHHHHHHHCCCCCCC  |
| 449 | EEEQRKQEQYSEEWQRKRYQREGRGQGHQP    | -43.40 | 25.8 | HHHHHHHHHHHHHHHHHHHHHHHHHHHHHHHHHCCCCCCC  |
| 974 | EEEEKMRQEQYNNNDYEQRYQYQYGRGQGHQP  | -43.38 | 29.0 | HHHHHHHHHHHHHHHHHHHHHHHHHHHHHHHHHCCCCCCC  |
| 059 | EQEARHQEQYSNDAEQRYQREGRGQGHQP     | -43.36 | 29.0 | HHHHHHHHHHHCCSHHHHHHHHHHHHHHHHHHHHHHCCCCC |
| 317 | EEERKKQLEQYKNEWEQEEYQRKGRGQGHQP   | -43.34 | 35.5 | HHHHHHHHHHHHHHHHHHHHHHHHHHHHHHHHHCCCCCCC  |
| 819 | EEEERRQEQYNNEYEDEEYQRKGRGKQGHQP   | -43.31 | 38.7 | HHHHHHHHHHHHHHHHHHHHHHHHHHHHHHHHHCCCCCCC  |
| 053 | EEEEKRYQEDYNNREEDQKYQREGRGKQGHQP  | -43.29 | 35.5 | HHHHHHHHHHHHHHHHHHHHHHHHHHHHHHHHHCCCCCCC  |
| 403 | EQEERHQREQYNNEYEQYQYQKEGRGQGHQP   | -43.29 | 29.0 | CHHHHHHHHHHHHHHHHHHHHHHHHHHHHHHHHCCCCCCC  |
| 491 | EQEKRHMLEQISNEKEDEEYQRYGRGKQGHQP  | -43.27 | 35.5 | HHHHHHHHHHHHHHHHHHHHHHHHHHHHHHHHHCCCCCCC  |
| 803 | EEEQRKYEQRNNDYEQRYQRYGQGQGHNP     | -43.24 | 29.0 | HHHHHHHHHHHHHHHHHHHHHHHHHHHHHHHHHCCCCCCC  |
| 773 | EQEARHNQEDYNQSEDERYQYQYGRGKQGHQP  | -43.24 | 35.5 | HHHHHHHHHHHHHHHHHHHHHHHHHHHHHHHHHCCCCCCC  |
| 411 | EEEEKRYQQQFKNEFEQKYYQQKQGQGHNP    | -43.22 | 32.3 | CHHHHHHHHHHHHHHHHHHHHHHHHHHHHHHHHCCCCCCC  |
| 772 | EEEEKKFQKYNHEYEQEEYQRKGRGQGHQP    | -43.18 | 45.2 | CHHHHHHHHHHHHHHHHHHHHHHHHHHHHHHHHCCCCCCC  |
| 033 | EQEQRHYEQRSNDEEHRRKQREGRGSQKQN    | -43.10 | 19.4 | HHHHHHHHHHHHHHHHHHHHHHHHHHHHHHHHHCCCCCCC  |
| 358 | EQEERHKQEQYSNEYEDEEYQRKGRGKQGHNP  | -43.09 | 32.3 | HHHHHHHHHHHHHHHHHHHHHHHHHHHHHHHHHCCCCCCC  |
| 518 | EEEEKRREEQYRNEWEQKRYQREGKQGHNP    | -43.06 | 32.3 | HHHHHHHHHHHHHHHHHHHHHHHHHHHHHHHHHCCCCCCC  |
| 973 | EEEEKKRQEQQSNNEEYQRYQRYGQGQGHYP   | -43.06 | 32.3 | HHHHHHHHHHHHHHHHHHHHHHHHHHHHHHHHHCCCCCCC  |
| 831 | EEERRKQLQEQESQEQRYQREGKQGHNP      | -43.00 | 32.3 | HHHHHHHHHHHHHHHHHHHHHHHHHHHHHHHHHCCCCCCC  |
| 816 | EEEEKKEQQYRNEYEQKYYQQQGGQGHQ      | -43.00 | 29.0 | HHHHHHHHHHHHHHHHHHHHHHHHHHHHHHHHHCCCCCCC  |
| 131 | EEEEKKYQQQFNHEYEQYQYQREGRGQGHQP   | -42.98 | 41.9 | CHHHHHHHHHHHHHHHHHHHHHHHHHHHHHHHHCCCCCCC  |
| 675 | EEEEKKMLEQYKNEWEQEEYQRKGRGQGHQP   | -42.92 | 35.5 | HHHHHHHHHHHHHHHHHHHHHHHHHHHHHHHHHCCCCCCC  |
| 495 | EEEEKQMEQKNEAEQQYQYGRGQGHQP       | -42.92 | 32.3 | CHHHHHHHHHHHHHHHHHHHHHHHHHHHHHHHHCCCCCCC  |
| 267 | EEEEKMRQEQFNNEEQRYQYQYQYGRGQGHQS  | -42.89 | 35.5 | HHHHHHHHHHHHHHHHHHHHHHHHHHHHHHHHHCCCCCCC  |
| 335 | EQERRKQLEQYKNEWEQEEYQRKGRGQGHNP   | -42.87 | 29.0 | HHHHHHHHHHHHHHHHHHHHHHHHHHHHHHHHHCCCCCCC  |
| 679 | EEEEKQRQAYNNRSEQRYQRYGRGQGHQP     | -42.86 | 29.0 | HHHHHHHHHHHHHHHHHHHHHHHHHHHHHHHHHCCCCCCC  |
| 422 | EEEEKQEQEDRSNRKEQEEYQRRGRGQGHQP   | -42.79 | 29.0 | HHHHHHHHHHHHHHHHHHHHHHHHHHHHHHHHHCCCCCCC  |
| 137 | EEEEKKRQEQINNEEQRYQRYGRGQGHQP     | -42.73 | 35.5 | HHHHHHHHHHHCCSHHHHHHHHHHHHHHHHHHHHHHCCCCC |
| 277 | EEERRKQEQQRNNEEQRYQRYGQGQGHQS     | -42.71 | 32.3 | HHHHHHHHHHHHHHHHHHHHHHHHHHHHHHHHHCCCCCCC  |
| 003 | EEERRKQLQEQESNEKEQKRYQREGKQGHQP   | -42.71 | 32.3 | HHHHHHHHHHHHHHHHHHHHHHHHHHHHHHHHHCCCCCCC  |
| 080 | EEEEKREQEQRSNDEEQRYQYQYGRGQGHQS   | -42.67 | 29.0 | HHHHHHHHHHHCCSHHHHHHHHHHHHHHHHHHHHHHCCCCC |
| 251 | EQERRHLEQYKNESEDERYQYQYKQKQGDSR   | -42.52 | 41.9 | HHHHHHHHHHHHHHHHHHHHHHHHHHHHHHHHHCCCCCCC  |
| 788 | EEERRKQLQHYKNRWEQEEYQRKGRGQGHQP   | -42.52 | 29.0 | HHHHHHHHHHHHHHHHHHHHHHHHHHHHHHHHHCCCCCCC  |
| 035 | EQERRHLEQIKNDKEHREKQRNGSGSKQY     | -42.51 | 22.6 | HHHHHHHHHHHHHHHHHHHHHHHHHHHHHHHHHCCCCCCC  |
| 627 | EQEQRKQEQAYSERYQEEYQRKGRGQGHQP    | -42.43 | 19.4 | HHHHHHHHHHHHHHHHHHHHHHHHHHHHHHHHHCCCCCCC  |
| 272 | EEEEKRQEQESNRKEQERYQREGRGQGHQP    | -42.39 | 25.8 | HHHHHHHHHHHHHHHHHHHHHHHHHHHHHHHHHCCCCCCC  |
| 160 | EQEERHNQEQYNNEEQRYQRYGRGQGHNP     | -42.38 | 29.0 | CHHHHHHHHHHCCSHHHHHHHHHHHHHHHHHHHHHHCCCCC |
| 538 | EQEERHKEEQYDNEWEQEKYQKEGRGQGHQP   | -42.36 | 25.8 | CHHHHHHHHHHHHHHHHHHHHHHHHHHHHHHHHCCCCCCC  |
| 402 | EEEQRKYEQQRNNEEQEEYQRKGRGQGHNP    | -42.29 | 32.3 | HHHHHHHHHHHHHHHHHHHHHHHHHHHHHHHHHCCCCCCC  |
| 079 | EQEERHKQEQIKNEKEDEEYQRRGKQKQDSR   | -42.18 | 38.7 | HHHHHHHHHHHHHHHHHHHHHHHHHHHHHHHHHCCCCCCC  |
| 228 | EEEEKMRDDYNNRYEQEEYQRKGRGQGHQP    | -42.05 | 32.3 | HHHHHHHHHHHHHHHHHHHHHHHHHHHHHHHHHCCCCCCC  |
| 864 | EQSERHKEQEKWNEWEQKYQQQGRGQGHQP    | -41.89 | 29.0 | CHHHHHHHHHHHHHHHHHHHHHHHHHHHHHHHHCCCCCCC  |
| 116 | EQEERKARQEQFNNEFEQYQYKQYGGQGHNP   | -41.85 | 38.7 | HHHHHHHHHHHHHHHHHHHHHHHHHHHHHHHHHCCCCCCC  |
| 299 | EEEKRKYLQDYNNRWEDQRYQREGRGKQGHQP  | -41.81 | 38.7 | HHHHHHHHHHHHHHHHHHHHHHHHHHHHHHHHHCCCCCCC  |
| 446 | EQEQRHYEQQRNNEEQRYQYQYGRGQGHNP    | -41.62 | 29.0 | HHHHHHHHHHHHHHHHHHHHHHHHHHHHHHHHHCCCCCCC  |
| 593 | EEERKKQLEDYNNRSEQERYQYQYQYGGQGHQS | -41.58 | 35.5 | HHHHHHHHHHHHHHHHHHHHHHHHHHHHHHHHHCCCCCCC  |
| 271 | EEEEKRQEQESNEKEQKRYQREGRGQGHNP    | -41.48 | 29.0 | HHHHHHHHHHHHHHHHHHHHHHHHHHHHHHHHHCCCCCCC  |
| 910 | EQERRHLEKINNEAEQRYQRYGRGQGHQP     | -41.24 | 38.7 | HHHHHHHHHHHHHHHHHHHHHHHHHHHHHHHHHCCCCCCC  |
| 178 | EQQRHYEQRSNDEEQRYQYQYQYGGQGHNP    | -41.20 | 25.8 | HHHHHHHHHHHHHHHHHHHHHHHHHHHHHHHHHCCCCCCC  |
| 673 | EQEERHMREQYNNEYEQEEYQYQYGRGQGHQP  | -41.13 | 29.0 | HHHHHHHHHHHHHHHHHHHHHHHHHHHHHHHHHCCCCCCC  |
| 349 | EQERRHLEQINNDQEQRYQRRGRGQGHQP     | -41.12 | 29.0 | HHHHHHHHHHHHHHHHHHHHHHHHHHHHHHHHHCCCCCCC  |
| 707 | EQEERKYQEDRNREEQRYQREGRGQGHQP     | -40.63 | 25.8 | CHHHHHHHHHHHHHHHHHHHHHHHHHHHHHHHHCCCCCCC  |
| 821 | EEEERRQEQYNNRWEQERYQREGKQGHSH     | -40.62 | 29.0 | HHHHHHHHHHHHHHHHHHHHHHHHHHHHHHHHHCCCCCCC  |
| 439 | EEEEKRQEQDFSNRYEQYQYKQYGGQGHSH    | -39.19 | 29.0 | HHHHHHHHHHHHHHHHHHHHHHHHHHHHHHHHHCCCCCCC  |
| 843 | EEEEKRYQQHFEERFRQYQYQYKQYGGQGHNP  | -38.10 | 25.8 | HHHHHHHHHHHHHHHHHHHHHHHHHHHHHHHHHCCCCCCC  |
| 680 | EQEERHYQEDYNNRYEQEEYQRKGRGQGHNP   | -37.92 | 25.8 | CHHHHHHHHHHHHHHHHHHHHHHHHHHHHHHHHCCCCCCC  |

**Table S3.** Summary of 966 peptide sequences designed using EvoEF2 and the evolutionary profile (weight = 0.50).

| #label | #peptide                          | #binding (EEU) | #SeqID (%) | #Secondary structure             |
|--------|-----------------------------------|----------------|------------|----------------------------------|
| WT     | EEQAKTFLDKFNHEAEDLFYQSSGLGKGDFR   | -46.46         | 100.       | HHHHHHHHHHHHHHHHHHHHHHCCCCCCCC   |
| 866    | EEERRKQLDKYNNEHEDKRYQREGMGKGHQP   | -51.00         | 48.4       | HHHHHHHHHHHHHHHHHHHHHHCCCCCCCC   |
| 986    | EEEARKQLDKYKNEEEDKRYQREGQGKGHQS   | -50.81         | 48.4       | HHHHHHHHHHHHHHHHHHHHHHCCCCCCCC   |
| 473    | EEEKKILDKINQEAEDKRYQREGWGKGHNPP   | -50.78         | 54.8       | HHHHHHHHHHHHHHHHHHHHHHCCCCCCCC   |
| 266    | EEEKRKILDKINNEAEDKRYQREGMGKGHQP   | -50.48         | 51.6       | HHHHHHHHHHHHHHHHHHHHHHCCCCCCCC   |
| 685    | EEEEQRKQDKYNNEYEDKEYYQQKGFKGHQS   | -50.33         | 45.2       | HHHHHHHHHHHHHHHHHHHHHHCCCCCCCC   |
| 477    | EEERKKQLDQYNNEYEDREYQRNGRKGKHQY   | -50.22         | 48.4       | HHHHHHHHHHHHHHHHHHHHHHCCCCCCCC   |
| 130    | EEERRKQLDQFNRRKEDERYQQQGMGKGHQP   | -50.09         | 45.2       | HHHHHHHHHHHHHHHHHHHHHHCCCCCCCC   |
| 514    | EEERKKQLDQYNNEHEDQRYQREGQGKGHSS   | -50.05         | 48.4       | HHHHHHHHHHHHHHHHHHHHHHCCCCCCCC   |
| 440    | EEERRKQLDQFNNEYEDSFYQQKGFKGHQS    | -50.05         | 51.6       | HHHHHHHHHHHHHHHHHHHHHHCCCCCCCC   |
| 824    | EEERRKQLDQYNNEEEDKRYQREGMGKGHQP   | -50.05         | 45.2       | HHHHHHHHHHHCHHHHHHHHHHHCCCCCCCC  |
| 565    | EEELKKILDQINQEEDDRYQRYGFGKGHQS    | -50.00         | 48.4       | HHHHHHHHHHHHHHHHHHHHHHCCCCCCCC   |
| 448    | EEEEKKKRDKYNNEYEDKEYYQRNGRKGKHQP  | -49.88         | 48.4       | CHHHHHHHHHHHHHHHHHHHHHHHCCCCCCCC |
| 591    | EEEKRKILDQLNQEKEKQRYQREGMGKGHQP   | -49.83         | 45.2       | HHHHHHHHHHHHHHHHHHHHHHCCCCCCCC   |
| 776    | EEELRKILDQINQEEDQRYQQYGFYGFKGHN   | -49.83         | 45.2       | HHHHHHHHHHHHHHHHHHHHHHCCCCCCCC   |
| 884    | EEEKRKILDQINNEQEDQSFQRHGFGKGSRS   | -49.81         | 45.2       | HHHHHHHHHHHHHHHHHHHHHHCCCCCCCC   |
| 426    | EEEKRKLLDKINNEEEDKRFQREGFGKGGKQN  | -49.77         | 45.2       | HHHHHHHHHHHHHHHHHHHHHHCCCCCCCC   |
| 190    | EEERKKQLEKYNQEHEDKRYQREGMGKGHQP   | -49.58         | 48.4       | HHHHHHHHHHHHHHHHHHHHHHCCCCCCCC   |
| 031    | EEEKRKILDQINNEEEDKRYQRYGFGKGHQS   | -49.53         | 45.2       | HHHHHHHHHHHHHHHHHHHHHHCCCCCCCC   |
| 080    | EEEKRKILDQYNNEYEDQEYQRNGRKGHSHY   | -49.53         | 45.2       | HHHHHHHHHHHHHHHHHHHHHHCCCCCCCC   |
| 566    | EEERRKQLDQFNRFEDDEYYQQYGFYGFKGHQS | -49.48         | 45.2       | HHHHHHHHHHHHHHHHHHHHHHCCCCCCCC   |
| 205    | EEEKLLLDKINNEEEDKRYQQYGFYGFKGHQS  | -49.46         | 51.6       | HHHHHHHHHHHHHHHHHHHHHHCCCCCCCC   |
| 283    | EEEKRKLLDKINNEAEDKRYQKQEGMGKGHQP  | -49.46         | 51.6       | HHHHHHHHHHHHHHHHHHHHHHCCCCCCCC   |
| 207    | EEEKRKLLDKINNEEEDKRYQREGFGKGHQS   | -49.46         | 48.4       | HHHHHHHHHHHHHHHHHHHHHHCCCCCCCC   |
| 969    | EEEKRKLLDKLNNEKEDKRYQREGQGKGHQS   | -49.46         | 48.4       | HHHHHHHHHHHHHHHHHHHHHHCCCCCCCC   |
| 179    | EEERRKQLDQYNNEYEDKEYYQQQGKGHSHY   | -49.44         | 45.2       | HHHHHHHHHHHHHHHHHHHHHHCCCCCCCC   |
| 724    | EEEQRKQDQYNNEYEDQKYQEQGFGKGHQS    | -49.38         | 41.9       | HHHHHHHHHHHHHHHHHHHHHHCCCCCCCC   |
| 297    | EEERRKQLEKFNNEFEDKYYQQGFGYGFKGHSS | -49.29         | 48.4       | HHHHHHHHHHHHHHHHHHHHHHCCCCCCCC   |
| 066    | EEERRKQLEKFNNEYEDKYYQQGFGYGFKGHQS | -49.29         | 48.4       | HHHHHHHHHHHHHHHHHHHHHHCCCCCCCC   |
| 933    | EEERRKQLDQYNNEEEDDMRYQREGMGKGHQP  | -49.21         | 48.4       | HHHHHHHHHHHCHHHHHHHHHHHCCCCCCCC  |
| 732    | EQEKRLLDQINQEKEKREYQRYGFGKGHQS    | -49.16         | 41.9       | HHHHHHHHHHHHHHHHHHHHHHCCCCCCCC   |
| 956    | EEERKKQLEKMKNEKEDKEYQRNGSGKGHSHY  | -49.10         | 45.2       | HHHHHHHHHHHHHHHHHHHHHHCCCCCCCC   |
| 745    | EEEAQQQEKYSNEYEDKEYYQRNGRKGHSHY   | -49.10         | 45.2       | HHHHHHHHHHHHHHHHHHHHHHCCCCCCCC   |
| 148    | EEEKRKQLEKYNNEEEDKRYQREGMGKGHQP   | -49.10         | 45.2       | HHHHHHHHHHHCHHHHHHHHHHHCCCCCCCC  |
| 303    | EEEKRKLLDQINQEAEDERYQQQGMGKGHQP   | -49.05         | 48.4       | HHHHHHHHHHHHHHHHHHHHHHCCCCCCCC   |
| 689    | EEEKLLLDQIENEREDQEYQRYGFGKGHQS    | -48.91         | 45.2       | HHHHHHHHHHHHHHHHHHHHHHCCCCCCCC   |
| 238    | EEEKFFLDKYNNEEEDDMRYQREGMGKGHQP   | -48.90         | 54.8       | HHHHHHHHHHHCHHHHHHHHHHHCCCCCCCC  |
| 688    | EEEKRKFLDKYNNEYEDKYYQQKGFYGFKGHSS | -48.90         | 51.6       | HHHHHHHHHHHHHHHHHHHHHHCCCCCCCC   |
| 836    | EEERKLLDQINNEEEDDRYQREGFGKGHQS    | -48.86         | 45.2       | HHHHHHHHHHHHHHHHHHHHHHCCCCCCCC   |
| 653    | EEEEKIQEKRNNNEEEDKRYQYQRSGMGKGHQP | -48.77         | 48.4       | CHHHHHHHHHHHHHHHHHHHHHHHCCCCCCCC |
| 293    | EEEKIKILEKINNEAEDKRYQRQGFYGFKGHSS | -48.77         | 51.6       | HHHHHHHHHHHHHHHHHHHHHHCCCCCCCC   |
| 001    | EEEKRKILEKINNEEEDKRYQREGMGKGHQP   | -48.77         | 45.2       | HHHHHHHHHHHHHHHHHHHHHHCCCCCCCC   |
| 861    | EEEKRKILEKINNEKEDKEYQRAGRKGKHQP   | -48.77         | 45.2       | HHHHHHHHHHHHHHHHHHHHHHCCCCCCCC   |
| 379    | EEEKRKILEKINNEKEDKEYQRSGMGKGKHQP  | -48.77         | 48.4       | HHHHHHHHHHHHHHHHHHHHHHCCCCCCCC   |
| 664    | EEEKRKILEKLNNEKEDKRYQRYGFGKGHQS   | -48.77         | 45.2       | HHHHHHHHHHHHHHHHHHHHHHCCCCCCCC   |
| 580    | EEEKLLLDQINNEAEDKRYQRYGQGKGHQS    | -48.75         | 51.6       | HHHHHHHHHHHHHHHHHHHHHHCCCCCCCC   |
| 326    | EEEKLLLDQINNEKEDDEYQRYGFGKGHSS    | -48.75         | 48.4       | HHHHHHHHHHHHHHHHHHHHHHCCCCCCCC   |
| 469    | EEEKLLLDQINNEKEDQEYQKQGMGKGHQP    | -48.75         | 48.4       | HHHHHHHHHHHHHHHHHHHHHHCCCCCCCC   |
| 413    | EEEKLLLDQLNNEKEDKRYQREGRKGKHQP    | -48.75         | 48.4       | HHHHHHHHHHHHHHHHHHHHHHCCCCCCCC   |
| 530    | EEEKRLLDQINNEAEDKRYQREGKKGHSA     | -48.75         | 48.4       | HHHHHHHHHHHHHHHHHHHHHHCCCCCCCC   |
| 160    | EEEKRLLDQINNEAEDQRYQREGMGKGHQP    | -48.75         | 48.4       | HHHHHHHHHHHHHHHHHHHHHHCCCCCCCC   |
| 803    | EEEKRLLDQINNEEEDERYQQQGMGKGHQP    | -48.75         | 45.2       | HHHHHHHHHHHHHHHHHHHHHHCCCCCCCC   |
| 142    | EEEKRLLDQINNEEEDKRYQQQGFYGFKGHQS  | -48.75         | 45.2       | HHHHHHHHHHHHHHHHHHHHHHCCCCCCCC   |
| 046    | EEEKRLLDQINNEEEDQRYQQQGFYGFKGHQS  | -48.75         | 45.2       | HHHHHHHHHHHHHHHHHHHHHHCCCCCCCC   |
| 394    | EEEKRLLDQINNEEEDQRYQQYGFYGFKGHQS  | -48.75         | 45.2       | HHHHHHHHHHHHHHHHHHHHHHCCCCCCCC   |
| 733    | EEEKRLLDQINNEEEDQRYQRYGGMGKGHQP   | -48.75         | 45.2       | HHHHHHHHHHHHHHHHHHHHHHCCCCCCCC   |
| 858    | EEEKRLLDQLNNEKEDQRYQRYGFGKGHSS    | -48.75         | 45.2       | HHHHHHHHHHHHHHHHHHHHHHCCCCCCCC   |
| 282    | EEERRKLLDQINNEEEDSRYYQQGMGKGHQP   | -48.75         | 45.2       | HHHHHHHHHHHHHHHHHHHHHHCCCCCCCC   |
| 792    | EEERKQLEKFNNEFEDKYYQQKGFYGFKGHQS  | -48.69         | 48.4       | HHHHHHHHHHHHHHHHHHHHHHCCCCCCCC   |
| 746    | EEERKQLEQFNQREEDERYQREGFGKGHSS    | -48.65         | 45.2       | HHHHHHHHHHHHHHHHHHHHHHCCCCCCCC   |
| 094    | EQEKRKILEQYNNDEYDEEYQRKGRKGKHQP   | -48.60         | 35.5       | HHHHHHHHHHHHHHHHHHHHHHCCCCCCCC   |
| 362    | EQEQRKQEQQFSNEYEDRFYQQKGFYGFKGHSS | -48.58         | 38.7       | HHHHHHHHHHHHHHHHHHHHHHCCCCCCCC   |
| 601    | EEEKRKFLDKNNNEEEDKRYQREGKGRGHSH   | -48.54         | 45.2       | HHHHHHHHHHHCHHHHHHHHHHHCCCCCCCC  |
| 049    | EEEKRLLDQINNEAEDKRYQREGKKGHSH     | -48.52         | 48.4       | HHHHHHHHHHHHHHHHHHHHHHCCCCCCCC   |









|     |                                     |        |      |                                          |
|-----|-------------------------------------|--------|------|------------------------------------------|
| 628 | EEEKRKWLKLNNEKEDKEYQKQGFQKGHQS      | -47.06 | 45.2 | HHHHHHHHHHHHHHHHHHHHHHHHHHHHHHHHHCCCCCCC |
| 258 | EEERKQLEQYNNYEDEEYQYRQKGRGKSDR      | -47.04 | 51.6 | HHHHHHHHHHHHHHHHHHHHHHHHHHHHHHHHHCCCCCCC |
| 159 | EEERRKQLQQYNNESEDQRYQQQGMGKGHP      | -47.04 | 41.9 | HHHHHHHHHHHHHHHHHHHHHHHHHHHHHHHHHCCCCCCC |
| 196 | EELLRKILDLQINNEKEQREYQRYGFGQGHQS    | -47.04 | 38.7 | HHHHHHHHHHHHHHHHHHHHHHHHHHHHHHHHHCCCCCCC |
| 549 | EQEKRLLEQLNNEKEDQRYQRYGFGKGDSDR     | -47.03 | 45.2 | HHHHHHHHHHHHHHHHHHHHHHHHHHHHHHHHHCCCCCCC |
| 954 | EEEKRKFLQFNQYEYEDQFFQKQKGFQKQKN     | -47.02 | 48.4 | HHHHHHHHHHHHHHHHHHHHHHHHHHHHHHHHHCCCCCCC |
| 815 | EEEKRKLEKLNNEEDDKRYQQYQYGFQKGDSDR   | -47.02 | 51.6 | HHHHHHHHHHHHHHHHHHHHHHHHHHHHHHHHHCCCCCCC |
| 041 | EEEKRKLEQINNDEEDRRYQRYGFGKGHQN      | -47.00 | 38.7 | HHHHHHHHHHHHHHHHHHHHHHHHHHHHHHHHHCCCCCCC |
| 193 | EEEKRKLEQINNRKEDDEEYQRNGSGKGHSY     | -47.00 | 38.7 | HHHHHHHHHHHHHHHHHHHHHHHHHHHHHHHHHCCCCCCC |
| 355 | EEEKRKFLDQFNNEYEHQFKQQKGFQSGKQN     | -46.99 | 45.2 | HHHHHHHHHHHHHHHHHHHHHHHHHHHHHHHHHCCCCCCC |
| 008 | EEKVKLLEQINNEADKRYQREGKKGKSH        | -46.99 | 48.4 | HHHHHHHHHHHHHHHHHHHHHHHHHHHHHHHHHCCCCCCC |
| 890 | EEKVKLLEQINNEADKRYQRYGFGKGSN        | -46.99 | 48.4 | HHHHHHHHHHHHHHHHHHHHHHHHHHHHHHHHHCCCCCCC |
| 831 | EEKVKLLEQINNEEEDERYQQQGFQKGHQS      | -46.99 | 45.2 | HHHHHHHHHHHHHHHHHHHHHHHHHHHHHHHHHCCCCCCC |
| 166 | EEKVKLLEQINNEEEDQRYQQYQYGFQKGHQS    | -46.99 | 45.2 | HHHHHHHHHHHHHHHHHHHHHHHHHHHHHHHHHCCCCCCC |
| 706 | EEKVKLLEQINNEEEDQRYQQYQYQYGMGKHTP   | -46.99 | 45.2 | HHHHHHHHHHHHHHHHHHHHHHHHHHHHHHHHHCCCCCCC |
| 369 | EEKVKLLEQINNEEEDQRYQREGFGKGHQS      | -46.99 | 45.2 | HHHHHHHHHHHHHHHHHHHHHHHHHHHHHHHHHCCCCCCC |
| 260 | EEKVKLLEQINNEKEDDEEYQRRGKKGKSH      | -46.99 | 45.2 | HHHHHHHHHHHHHHHHHHHHHHHHHHHHHHHHHCCCCCCC |
| 170 | EEKVKLLEQINNEYEDEEYQQKGFQKGHQS      | -46.99 | 48.4 | HHHHHHHHHHHHHHHHHHHHHHHHHHHHHHHHHCCCCCCC |
| 219 | EEKVKLLEQLNNEKEDKRYQRQFGKGS         | -46.99 | 45.2 | HHHHHHHHHHHHHHHHHHHHHHHHHHHHHHHHHCCCCCCC |
| 180 | EEEKRKLEQINNEADERYQQQGFQKGHQS       | -46.99 | 45.2 | HHHHHHHHHHHHHHHHHHHHHHHHHHHHHHHHHCCCCCCC |
| 905 | EEEKRKLEQINNEADKRYQRYGFGKGHQS       | -46.99 | 45.2 | HHHHHHHHHHHHHHHHHHHHHHHHHHHHHHHHHCCCCCCC |
| 288 | EEEKRKLEQINNEADQRYQRQGFQKGSN        | -46.99 | 45.2 | HHHHHHHHHHHHHHHHHHHHHHHHHHHHHHHHHCCCCCCC |
| 892 | EEEKRKLEQINNEEEDERYQQQKKGKGS        | -46.99 | 41.9 | HHHHHHHHHHHHHHHHHHHHHHHHHHHHHHHHHCCCCCCC |
| 519 | EEEKRKLEQINNEEDKRYQQYQYGFQKGHQS     | -46.99 | 41.9 | HHHHHHHHHHHHHHHHHHHHHHHHHHHHHHHHHCCCCCCC |
| 390 | EEEKRKLEQINNEEEDKRYQREGKKGKSH       | -46.99 | 41.9 | HHHHHHHHHHHHHHHHHHHHHHHHHHHHHHHHHCCCCCCC |
| 878 | EEEKRKLEQINNEEEDKRYQREGMGKGHQP      | -46.99 | 41.9 | HHHHHHHHHHHHHHHHHHHHHHHHHHHHHHHHHCCCCCCC |
| 679 | EEEKRKLEQINNEEEDKRYQREGQKKGHQS      | -46.99 | 41.9 | HHHHHHHHHHHHHHHHHHHHHHHHHHHHHHHHHCCCCCCC |
| 869 | EEEKRKLEQINNEEEDKRYQRYGMGKGHQP      | -46.99 | 41.9 | HHHHHHHHHHHHHHHHHHHHHHHHHHHHHHHHHCCCCCCC |
| 370 | EEEKRKLEQINNEEEDQRYQQQGWGKGHNP      | -46.99 | 41.9 | HHHHHHHHHHHHHHHHHHHHHHHHHHHHHHHHHCCCCCCC |
| 769 | EEEKRKLEQINNEEEDQRYQQYQYQYGMGKGHNP  | -46.99 | 41.9 | HHHHHHHHHHHHHHHHHHHHHHHHHHHHHHHHHCCCCCCC |
| 154 | EEEKRKLEQINNEEEDQRYQREGFGKGHQS      | -46.99 | 41.9 | HHHHHHHHHHHHHHHHHHHHHHHHHHHHHHHHHCCCCCCC |
| 547 | EEEKRKLEQINNEEEDQRYQRYGFGKGSN       | -46.99 | 41.9 | HHHHHHHHHHHHHHHHHHHHHHHHHHHHHHHHHCCCCCCC |
| 109 | EEEKRKLEQINNEKEDDEEYQRRGMGKGHQP     | -46.99 | 41.9 | HHHHHHHHHHHHHHHHHHHHHHHHHHHHHHHHHCCCCCCC |
| 023 | EEEKRKLEQINNEKEDDEEYQRYGMGKGHQP     | -46.99 | 41.9 | HHHHHHHHHHHHHHHHHHHHHHHHHHHHHHHHHCCCCCCC |
| 284 | EEEKRKLEQINNEKEDKEYQKQGFQKGHQS      | -46.99 | 41.9 | HHHHHHHHHHHHHHHHHHHHHHHHHHHHHHHHHCCCCCCC |
| 476 | EEEKRKLEQINNEKEDQYQKQGMGKGHQP       | -46.99 | 41.9 | HHHHHHHHHHHHHHHHHHHHHHHHHHHHHHHHHCCCCCCC |
| 762 | EEEKRKLEQINNEKEDQEYQYQYQYQYQYQYQYQY | -46.99 | 41.9 | HHHHHHHHHHHHHHHHHHHHHHHHHHHHHHHHHCCCCCCC |
| 147 | EEEKRKLEQINNEQEDERYQRQGFQKGHQS      | -46.99 | 41.9 | HHHHHHHHHHHHHHHHHHHHHHHHHHHHHHHHHCCCCCCC |
| 744 | EEEKRKLEQINNEEQEDQRYQREGMGKGHQP     | -46.99 | 41.9 | HHHHHHHHHHHHHHHHHHHHHHHHHHHHHHHHHCCCCCCC |
| 038 | EEEKRKLEQLNNEKEDKRYQREGMGKGHQP      | -46.99 | 41.9 | HHHHHHHHHHHHHHHHHHHHHHHHHHHHHHHHHCCCCCCC |
| 770 | EEEKRKLEQLNNEKEDMRYQQQGFQKGHQS      | -46.99 | 41.9 | HHHHHHHHHHHHHHHHHHHHHHHHHHHHHHHHHCCCCCCC |
| 073 | EEEKRKLEQLNNEKEDQRYQKQGFQKGHQS      | -46.99 | 41.9 | HHHHHHHHHHHHHHHHHHHHHHHHHHHHHHHHHCCCCCCC |
| 150 | EEEKRKLEQLNNEKEDQRYQRYGFGKGHQS      | -46.99 | 41.9 | HHHHHHHHHHHHHHHHHHHHHHHHHHHHHHHHHCCCCCCC |
| 595 | EEEKRKLEQLNNEKEDQRYQRYGFGKGS        | -46.99 | 41.9 | HHHHHHHHHHHHHHHHHHHHHHHHHHHHHHHHHCCCCCCC |
| 365 | EEEWRKLEQYNNEEYDEEYQRYQREGMGKGHQP   | -46.99 | 41.9 | HHHHHHHHHHHHHHHHHHHHHHHHHHHHHHHHHCCCCCCC |
| 343 | EEEWRKLEQYNNEEYDEEYQRTGRGKGS        | -46.99 | 38.7 | HHHHHHHHHHHHHHHHHHHHHHHHHHHHHHHHHCCCCCCC |
| 225 | EQEARKLEQINNEEEDKRYQREGVQKGHNP      | -46.99 | 38.7 | HHHHHHHHHHHHHHHHHHHHHHHHHHHHHHHHHCCCCCCC |
| 779 | EQEKRKLEQINNEADKRYQKQGFQKGHNP       | -46.99 | 41.9 | HHHHHHHHHHHHHHHHHHHHHHHHHHHHHHHHHCCCCCCC |
| 108 | EQEKRKLEQINNEEEDQRYQRYGFGKGHQS      | -46.99 | 38.7 | HHHHHHHHHHHHHHHHHHHHHHHHHHHHHHHHHCCCCCCC |
| 974 | EEEKRKMLEKLNNEKEHEEYQRYGFGKGHQS     | -46.96 | 38.7 | HHHHHHHHHHHHHHHHHHHHHHHHHHHHHHHHHCCCCCCC |
| 691 | EEEKRKFLKYNNEYEDEEYQRNGRKGHSY       | -46.95 | 48.4 | HHHHHHHHHHHHHHHHHHHHHHHHHHHHHHHHHCCCCCCC |
| 672 | EEQRKYQQRNQEEDQYQQYQYQYQYQYQYQY     | -46.94 | 41.9 | CHHHHHHHHHHHHHHHHHHHHHHHHHHHHHHHHCCCCCCC |
| 301 | EEERKFQDQYNNEEYDEEYQYRQKGRGKSDR     | -46.94 | 51.6 | CHHHHHHHHHHHHHHHHHHHHHHHHHHHHHHHHCCCCCCC |
| 439 | EEKVKLLEQIEQEREDSEYQQKGFQKGHQS      | -46.93 | 41.9 | HHHHHHHHHHHHHHHHHHHHHHHHHHHHHHHHHCCCCCCC |
| 373 | EEERRKLEKFNQYEYEDKRYQKQGFQKGHQN     | -46.92 | 51.6 | HHHHHHHHHHHHHHHHHHHHHHHHHHHHHHHHHCCCCCCC |
| 536 | EEEKRKFLQYNQYEDQYQRNNGRKGKGY        | -46.85 | 41.9 | HHHHHHHHHHHHHHHHHHHHHHHHHHHHHHHHHCCCCCCC |
| 393 | EEKVKLLEKLNNEADKRYQRQGFQKGSN        | -46.82 | 51.6 | HHHHHHHHHHHHHHHHHHHHHHHHHHHHHHHHHCCCCCCC |
| 582 | EEKRKLLEKLNNEAEQKRYQREGWQGHNP       | -46.80 | 45.2 | HHHHHHHHHHHHHHHHHHHHHHHHHHHHHHHHHCCCCCCC |
| 587 | EEKRKLLEKLNNEAEQKRYQREGWQGHQP       | -46.80 | 41.9 | HHHHHHHHHHHHHHHHHHHHHHHHHHHHHHHHHCCCCCCC |
| 451 | DEERKMLEKLNNEEEDKRYQQQGMGKGHQP      | -46.79 | 45.2 | HHHHHHHHHHHHHHHHHHHHHHHHHHHHHHHHHCCCCCCC |
| 167 | DEERKMLEKLNNEKEDKEYQKRGKGHNP        | -46.79 | 45.2 | HHHHHHHHHHHHHHHHHHHHHHHHHHHHHHHHHCCCCCCC |
| 785 | EEKVKMLEKFNNEEYDKYQQKQGFQKGHSH      | -46.79 | 51.6 | HHHHHHHHHHHHHHHHHHHHHHHHHHHHHHHHHCCCCCCC |
| 460 | EEKVKMLEKLNNEADKRYQRYGFGKGS         | -46.79 | 51.6 | HHHHHHHHHHHHHHHHHHHHHHHHHHHHHHHHHCCCCCCC |
| 318 | EEKVKMLEKLNNEADKRYQRYGMGKGHQP       | -46.79 | 51.6 | HHHHHHHHHHHHHHHHHHHHHHHHHHHHHHHHHCCCCCCC |
| 398 | EEKVKMLEKLNNEKEDKEYQRGGFQKGHQP      | -46.79 | 48.4 | HHHHHHHHHHHHHHHHHHHHHHHHHHHHHHHHHCCCCCCC |
| 252 | EEKVKMLEKLNNEKEDKEYQRSGMKGKHP       | -46.79 | 51.6 | HHHHHHHHHHHHHHHHHHHHHHHHHHHHHHHHHCCCCCCC |
| 617 | EEKVKMLEKYNNEAEDIYQKQGFQKGHSS       | -46.79 | 51.6 | HHHHHHHHHHHHHHHHHHHHHHHHHHHHHHHHHCCCCCCC |

|     |                                  |        |      |                                     |
|-----|----------------------------------|--------|------|-------------------------------------|
| 711 | EEEEKMMLEKYNNEYEDEEYQKGRGKGHQP   | -46.79 | 48.4 | HHHHHHHHHHHHHHHHHHHHHHHHHHHHHHHHHCC |
| 638 | EEEEKMMLEKFNNEFEDKYYQQYGFKGHS    | -46.79 | 48.4 | HHHHHHHHHHHHHHHHHHHHHHHHHHHHHHHHHCC |
| 958 | EEEEKMMLEKFNNEYEDKYYQQGFKGHS     | -46.79 | 51.6 | HHHHHHHHHHHHHHHHHHHHHHHHHHHHHHHHHCC |
| 378 | EEEEKMMLEKFNNEYEDKYYQQGKGHS      | -46.79 | 48.4 | HHHHHHHHHHHHHHHHHHHHHHHHHHHHHHHHHCC |
| 993 | EEEEKMMLEKINNEAEDKRYQRYGFKGHS    | -46.79 | 48.4 | HHHHHHHHHHHHHHHHHHHHHHHHHHHHHHHHHCC |
| 901 | EEEEKMMLEKINNEEDKRYQQYGMGKGHQP   | -46.79 | 45.2 | HHHHHHHHHHHHHHHHHHHHHHHHHHHHHHHHHCC |
| 468 | EEEEKMMLEKINNEKEDKEYQKQGFKGHS    | -46.79 | 45.2 | HHHHHHHHHHHHHHHHHHHHHHHHHHHHHHHHHCC |
| 539 | EEEQRKMMLEKINNEEDKRYRQGFKGHS     | -46.79 | 45.2 | HHHHHHHHHHHHHHHHHHHHHHHHHHHHHHHHHCC |
| 643 | EQEKRKMMLEKINNEKEDKEYQKQGMGKGHQP | -46.79 | 41.9 | HHHHHHHHHHHHHHHHHHHHHHHHHHHHHHHHHCC |
| 377 | EEERRKQLDQMKNEKEQEYQRYGFQGHSP    | -46.78 | 35.5 | HHHHHHHHHHHHHHHHHHHHHHHHHHHHHHHHHCC |
| 702 | EEERRKQLEKINNEAEDKRYQREGMGKGHQP  | -46.77 | 51.6 | HHHHHHHHHHHHHHHHHHHHHHHHHHHHHHHHHCC |
| 058 | EEERRKQLEKYNNEEDKRYQREGFGKHS     | -46.77 | 48.4 | HHHHHHHHHHHHCCHHHHHHHHHHHHCC        |
| 913 | EEERRKQLEKINNEAEDKRYQQYGFKGHS    | -46.77 | 48.4 | HHHHHHHHHHHHHHHHHHHHHHHHHHHHHHHHHCC |
| 234 | EEERRKQLEKINNEAEDKRYQQYGFKGHS    | -46.77 | 48.4 | HHHHHHHHHHHHHHHHHHHHHHHHHHHHHHHHHCC |
| 882 | EEERRKQLEKINNEEDKRYQREGQGHQP     | -46.77 | 45.2 | HHHHHHHHHHHHHHHHHHHHHHHHHHHHHHHHHCC |
| 975 | EEERRKQLEKYNNESEDKRYQRYGFKGHS    | -46.77 | 45.2 | HHHHHHHHHHHHHHHHHHHHHHHHHHHHHHHHHCC |
| 856 | EEERRKQLEKYNNEYEDEEYQKGRGKHS     | -46.77 | 45.2 | HHHHHHHHHHHHHHHHHHHHHHHHHHHHHHHHHCC |
| 813 | EQERRKQLEKINNEAEDKRYQREGMGKGHQP  | -46.77 | 45.2 | HHHHHHHHHHHHHHHHHHHHHHHHHHHHHHHHHCC |
| 739 | EEQRKFLKKNNEEDKRYQQQGWGHTP       | -46.75 | 51.6 | HHHHHHHHHHHHHHHHHHHHHHHHHHHHHHHHHCC |
| 555 | EEEEKMLLEQINNEAEDKRYQREGMGKGHQP  | -46.75 | 45.2 | HHHHHHHHHHHHHHHHHHHHHHHHHHHHHHHHHCC |
| 320 | EEEEKMLLEKLNNEKEDMRYQREGMGKGHQP  | -46.73 | 48.4 | HHHHHHHHHHHHHHHHHHHHHHHHHHHHHHHHHCC |
| 296 | EEEEKMLFQYNNNEYEDEFQRKGRGKSN     | -46.73 | 41.9 | CHHHHHHHHHHHHHHHHHHHHHHHHCC         |
| 231 | EEEEKMLFQYNNNEYDQFQKEGFGKSN      | -46.73 | 45.2 | HHHHHHHHHHHHHHHHHHHHHHHHHHHHHHHHHCC |
| 802 | EEEEKMLFQMKNEKEDQEFQRAFGKSN      | -46.73 | 38.7 | HHHHHHHHHHHHHHHHHHHHHHHHHHHHHHHHHCC |
| 973 | EEEEKMLFQYNNQEYDEEYQKGRGHS       | -46.72 | 41.9 | CHHHHHHHHHHHHHHHHHHHHHHHHCC         |
| 484 | EEEEKMLFQYNNQEYDEEYQKGRGHS       | -46.72 | 48.4 | HHHHHHHHHHHHHHHHHHHHHHHHHHHHHHHHHCC |
| 894 | EEEEKMLFQFNQEFEDQFYQKGFKGHS      | -46.72 | 51.6 | HHHHHHHHHHHHHHHHHHHHHHHHHHHHHHHHHCC |
| 512 | EEEEKMLFQYNNQEAEDERYQQGMGKGHQP   | -46.72 | 48.4 | HHHHHHHHHHHHHHHHHHHHHHHHHHHHHHHHHCC |
| 401 | EEEEKMLFQYNNQEEDMRYQREGFGKHS     | -46.72 | 45.2 | HHHHHHHHHHHHHHHHHHHHHHHHHHHHHHHHHCC |
| 129 | EEEEKMLFQYNNQESDQRYQQGMGKGHQP    | -46.72 | 45.2 | HHHHHHHHHHHHHHHHHHHHHHHHHHHHHHHHHCC |
| 893 | EEEEKMLFQYNNQESDQRYQRYGFKGHS     | -46.72 | 45.2 | HHHHHHHHHHHHHHHHHHHHHHHHHHHHHHHHHCC |
| 755 | EEEEKMLFQYNNQEYDEEYQRVGRGHS      | -46.72 | 45.2 | HHHHHHHHHHHHHHHHHHHHHHHHHHHHHHHHHCC |
| 250 | EEELKMLLEQIEQEREDQEYQKGFKGDSR    | -46.71 | 48.4 | HHHHHHHHHHHHHHHHHHHHHHHHHHHHHHHHHCC |
| 329 | EEEEKMLLEQINNEKEDQEYQRRGWGHTP    | -46.66 | 41.9 | HHHHHHHHHHHHHHHHHHHHHHHHHHHHHHHHHCC |
| 990 | EEEEKMLLEQLNNEKEDQRYQREGMGKGHQP  | -46.66 | 41.9 | HHHHHHHHHHHHHHHHHHHHHHHHHHHHHHHHHCC |
| 144 | EQEKRKMLFQMKNEKEDQEFQRRGMGKSN    | -46.66 | 35.5 | HHHHHHHHHHHHHHHHHHHHHHHHHHHHHHHHHCC |
| 603 | EEEEKMLLDQINNEKEDRRYQQGFKGDSR    | -46.66 | 54.8 | HHHHHHHHHHHHHHHHHHHHHHHHHHHHHHHHHCC |
| 198 | EEEEKMLLEKINQEADRRYQREGMGKGHQP   | -46.65 | 51.6 | HHHHHHHHHHHHHHHHHHHHHHHHHHHHHHHHHCC |
| 644 | EEEEKMLLEQINQEYEDQRYQRYGFKGHTN   | -46.65 | 41.9 | HHHHHHHHHHHHHHHHHHHHHHHHHHHHHHHHHCC |
| 800 | EEERRKQLEKINNEAEDKRYQRYGFKGHS    | -46.62 | 51.6 | HHHHHHHHHHHHHHHHHHHHHHHHHHHHHHHHHCC |
| 075 | EEEEKMLWLEQLNNEKEDKRKQREGSGKQR   | -46.61 | 38.7 | HHHHHHHHHHHHHHHHHHHHHHHHHHHHHHHHHCC |
| 467 | EEEEKMLLEKYNNEYEDKRYQKGFKGHS     | -46.59 | 51.6 | HHHHHHHHHHHHHHHHHHHHHHHHHHHHHHHHHCC |
| 989 | EEEEKMLLEKINNEEHKRYQREGFGSGKSN   | -46.56 | 38.7 | HHHHHHHHHHHHHHHHHHHHHHHHHHHHHHHHHCC |
| 316 | EEEEKMLFLEKYNQESDQRYQQGFKGNSN    | -46.55 | 48.4 | HHHHHHHHHHHHHHHHHHHHHHHHHHHHHHHHHCC |
| 257 | EEEEKMLFDKYNQEEDKRYQREGKGQHS     | -46.54 | 45.2 | HHHHHHHHHHHHHHHHHHHHHHHHHHHHHHHHHCC |
| 404 | EEERRKQLDQINNEQEHKRYQKGRGSKSR    | -46.54 | 41.9 | HHHHHHHHHHHHHHHHHHHHHHHHHHHHHHHHHCC |
| 188 | EEERRKQLEKINNEEDKRYQRYGFKGHS     | -46.53 | 45.2 | HHHHHHHHHHHHHHHHHHHHHHHHHHHHHHHHHCC |
| 675 | EEEARKQFQYNNNEADRRYQRYGFKGHS     | -46.53 | 48.4 | HHHHHHHHHHHHHHHHHHHHHHHHHHHHHHHHHCC |
| 323 | EEEEKMLFQKNNEEDRRYQQYGMGKGHQP    | -46.53 | 48.4 | HHHHHHHHHHHHHHHHHHHHHHHHHHHHHHHHHCC |
| 636 | EEEEKMLFQFNNNEFDRRYQQGFKGHS      | -46.53 | 48.4 | HHHHHHHHHHHHHHHHHHHHHHHHHHHHHHHHHCC |
| 847 | EEEEKMLFQYNNNEEDRRYQQGNGKHS      | -46.53 | 45.2 | HHHHHHHHHHHHHHHHHHHHHHHHHHHHHHHHHCC |
| 345 | EEEEKMLLEKINNEAEDKRYQKGFKGDSR    | -46.51 | 54.8 | HHHHHHHHHHHHHHHHHHHHHHHHHHHHHHHHHCC |
| 310 | EEEEKMLLEKINNEQEDQEYQKGFKGDSR    | -46.51 | 51.6 | HHHHHHHHHHHHHHHHHHHHHHHHHHHHHHHHHCC |
| 576 | EQEARKQLEKYKNEYEQEYQKGRGQGHQP    | -46.50 | 35.5 | HHHHHHHHHHHHHHHHHHHHHHHHHHHHHHHHHCC |
| 194 | EEEEKMLLEQIEQEREDKEYRQGFKGHS     | -46.49 | 38.7 | HHHHHHHHHHHHHHHHHHHHHHHHHHHHHHHHHCC |
| 577 | EEEEKMLLEKFNNEYEDQEYQKGRGKHS     | -46.47 | 48.4 | HHHHHHHHHHHHHHHHHHHHHHHHHHHHHHHHHCC |
| 348 | EEEEKMLLEQINNEKEDQEYQRSGMGKGHQP  | -46.47 | 48.4 | HHHHHHHHHHHHHHHHHHHHHHHHHHHHHHHHHCC |
| 121 | EEEEKMLLEQLNNEEDKRYQQGQGHQP      | -46.47 | 41.9 | HHHHHHHHHHHHHHHHHHHHHHHHHHHHHHHHHCC |
| 429 | EEEWKMLMEYNNNEYEDQEYQRNGRGS      | -46.47 | 41.9 | HHHHHHHHHHHHHHHHHHHHHHHHHHHHHHHHHCC |
| 589 | EQEYRWLEKYKNEAEDKRYQRYGMGKGHQP   | -46.47 | 41.9 | HHHHHHHHHHHHHHHHHHHHHHHHHHHHHHHHHCC |
| 747 | EQERRKFLQYNNRYEDEEYQKEGMGKGHQP   | -46.46 | 38.7 | HHHHHHHHHHHHHHHHHHHHHHHHHHHHHHHHHCC |
| 290 | EEEEKMLWLEKLNNEKEDQEYQRNGRGS     | -46.46 | 45.2 | HHHHHHHHHHHHHHHHHHHHHHHHHHHHHHHHHCC |
| 887 | EEEEKMLFLEKFNNEKEDKRYQQGFKGDSR   | -46.45 | 58.1 | HHHHHHHHHHHHHHHHHHHHHHHHHHHHHHHHHCC |
| 437 | EEEEKMLFLEKYNNEAEDKRYQQGFKGDSR   | -46.45 | 58.1 | HHHHHHHHHHHHHHHHHHHHHHHHHHHHHHHHHCC |
| 222 | EEEEKMLLDQINNRQEQERYQREGQGHS     | -46.43 | 35.5 | HHHHHHHHHHHHHHHHHHHHHHHHHHHHHHHHHCC |
| 877 | EEEEKMLLEKINQEADRRYQREGKGD       | -46.42 | 54.8 | HHHHHHHHHHHHHHHHHHHHHHHHHHHHHHHHHCC |
| 319 | EEEAKEEYQFNEYEDQRYQQGFKGHS       | -46.42 | 48.4 | HHHHHHHHHHHHHHHHHHHHHHHHHHHHHHHHHCC |

|     |                                  |        |      |                                            |
|-----|----------------------------------|--------|------|--------------------------------------------|
| 459 | EEEARKFKEQYDNEYEDQEQYRTGRGKGHQF  | -46.42 | 41.9 | HHHHHHHHHHHHHHHHHHHHHHHHHHHHHHHHHCCCCCCCC  |
| 456 | EEEEKRFQEQYNNESEDQRYQRYGFGKGHS   | -46.42 | 41.9 | CHHHHHHHHHHHHHHHHHHHHHHHHHHHHHHHHHCCCCCCCC |
| 083 | EEEEKRFQEQYNNEYEDEEYQRNRGRGKGHSY | -46.42 | 41.9 | CHHHHHHHHHHHHHHHHHHHHHHHHHHHHHHHHHCCCCCCCC |
| 495 | EEEEKRFREQKNNEEDERYQROGWGKGHTP   | -46.42 | 41.9 | CHHHHHHHHHHHHHHHHHHHHHHHHHHHHHHHHHCCCCCCCC |
| 399 | EEEEKRFREQYNNEAEDQRYQQQGMGKGHP   | -46.42 | 45.2 | CHHHHHHHHHHHHHHHHHHHHHHHHHHHHHHHHHCCCCCCCC |
| 533 | EEEEKKFLEQFNNEEEDKRYQREGMGKGHP   | -46.42 | 51.6 | HHHHHHHHHHHHHHHHHHHHHHHHHHHHHHHHCCCCCCCC   |
| 409 | EEEEKKFLEQFNNEFEDQYYQKGFKGKHS    | -46.42 | 51.6 | HHHHHHHHHHHHHHHHHHHHHHHHHHHHHHHHCCCCCCCC   |
| 712 | EEEEKKFLEQFNNEFEDQYYQQGFGKGSN    | -46.42 | 51.6 | HHHHHHHHHHHHHHHHHHHHHHHHHHHHHHHHCCCCCCCC   |
| 640 | EEEEKKFLEQFNNEYEDKRYQQQGFKGKHSN  | -46.42 | 54.8 | HHHHHHHHHHHHHHHHHHHHHHHHHHHHHHHHCCCCCCCC   |
| 919 | EEEEKKFLEQFNNEYEDQFYQQKGFGKGHQN  | -46.42 | 54.8 | HHHHHHHHHHHHHHHHHHHHHHHHHHHHHHHHCCCCCCCC   |
| 115 | EEEEKKFLEQFNNEYEDQYYQQKGGKGKHP   | -46.42 | 51.6 | HHHHHHHHHHHHHHHHHHHHHHHHHHHHHHHHCCCCCCCC   |
| 789 | EEEEKKFLEQLNNEKEDEEYQRYGFGKGHS   | -46.42 | 48.4 | HHHHHHHHHHHHHHHHHHHHHHHHHHHHHHHHCCCCCCCC   |
| 904 | EEEEKKFLEQYNNEHEDEERYQQQGFKGKHS  | -46.42 | 48.4 | HHHHHHHHHHHHHHHHHHHHHHHHHHHHHHHHCCCCCCCC   |
| 100 | EEEEKKFLEQYNNEHEDEQRYQQQGMGKGHP  | -46.42 | 48.4 | HHHHHHHHHHHHHHHHHHHHHHHHHHHHHHHHCCCCCCCC   |
| 811 | EEEEKKFLEQYNNESEDERYQQQGFKGKHSN  | -46.42 | 48.4 | HHHHHHHHHHHHHHHHHHHHHHHHHHHHHHHHCCCCCCCC   |
| 317 | EEEEKKFLEQYNNESEDKRYQRYGFGKGHS   | -46.42 | 48.4 | HHHHHHHHHHHHHHHHHHHHHHHHHHHHHHHHCCCCCCCC   |
| 623 | EEEEKKFLEQYNNESEDKRYQRYGMGKGHP   | -46.42 | 48.4 | HHHHHHHHHHHHHHHHHHHHHHHHHHHHHHHHCCCCCCCC   |
| 757 | EEEEKKFLEQYNNESEDQRYQKEGFGKGHS   | -46.42 | 48.4 | HHHHHHHHHHHHHHHHHHHHHHHHHHHHHHHHCCCCCCCC   |
| 851 | EEEEKKFLEQYNNESEDQRYQRYGFGKGHS   | -46.42 | 48.4 | HHHHHHHHHHHHHHHHHHHHHHHHHHHHHHHHCCCCCCCC   |
| 540 | EEEEKKFLEQYNNEYEDEEYQRKGMGKGHP   | -46.42 | 48.4 | HHHHHHHHHHHHHHHHHHHHHHHHHHHHHHHHCCCCCCCC   |
| 235 | EEEEKKFLEQYNNEYEDEEYQRKGRGKHS    | -46.42 | 48.4 | HHHHHHHHHHHHHHHHHHHHHHHHHHHHHHHHCCCCCCCC   |
| 764 | EEEEKKFLEQYNNEYEDEEYQRNRGRGKHSY  | -46.42 | 48.4 | HHHHHHHHHHHHHHHHHHHHHHHHHHHHHHHHCCCCCCCC   |
| 551 | EEEEKKFLEQYNNEYEDEEYQRKGFGKGS    | -46.42 | 48.4 | HHHHHHHHHHHHHHHHHHHHHHHHHHHHHHHHCCCCCCCC   |
| 203 | EEEEKKFLEQYNNEYEDQYYQQKGGKGKHP   | -46.42 | 48.4 | HHHHHHHHHHHHHHHHHHHHHHHHHHHHHHHHCCCCCCCC   |
| 405 | EEEEKRFLEQFNNEEDKRYQREGFGKGHS    | -46.42 | 48.4 | HHHHHHHHHHHHHHHHHHHHHHHHHHHHHHHHCCCCCCCC   |
| 016 | EEEEKRFLEQFNNEEEDKRYQREGMGKGHP   | -46.42 | 48.4 | HHHHHHHHHHHHHHHHHHHHHHHHHHHHHHHHCCCCCCCC   |
| 798 | EEEEKRFLEQFNNEYEDEEYQRKGRGKHS    | -46.42 | 48.4 | HHHHHHHHHHHHHHHHHHHHHHHHHHHHHHHHCCCCCCCC   |
| 788 | EEEEKRFLEQFNNEYEDEEYQRYVGRGKHSF  | -46.42 | 48.4 | HHHHHHHHHHHHHHHHHHHHHHHHHHHHHHHHCCCCCCCC   |
| 923 | EEEEKRFLEQFNNEYEDKRYQQEGMGKHP    | -46.42 | 48.4 | HHHHHHHHHHHHHHHHHHHHHHHHHHHHHHHHCCCCCCCC   |
| 483 | EEEEKRFLEQFNNEYEDKRYQKEGQKGS     | -46.42 | 48.4 | HHHHHHHHHHHHHHHHHHHHHHHHHHHHHHHHCCCCCCCC   |
| 036 | EEEEKRFLEQFNNEYEDQFYQQKGFGKHS    | -46.42 | 51.6 | HHHHHHHHHHHHHHHHHHHHHHHHHHHHHHHHCCCCCCCC   |
| 984 | EEEEKRFLEQFNNEYEDQRYQQEGFGKHP    | -46.42 | 48.4 | HHHHHHHHHHHHHHHHHHHHHHHHHHHHHHHHCCCCCCCC   |
| 412 | EEEEKRFLEQFNNEYEDQRYQQEGFGKHS    | -46.42 | 48.4 | HHHHHHHHHHHHHHHHHHHHHHHHHHHHHHHHCCCCCCCC   |
| 059 | EEEEKRFLEQFNNEYEDQRYQQEGMGKHP    | -46.42 | 48.4 | HHHHHHHHHHHHHHHHHHHHHHHHHHHHHHHHCCCCCCCC   |
| 611 | EEEEKRFLEQFNNEYEDQYYQQKGFKGHS    | -46.42 | 48.4 | HHHHHHHHHHHHHHHHHHHHHHHHHHHHHHHHCCCCCCCC   |
| 857 | EEEEKRFLEQFNNEYEDQYYQQKGGKGS     | -46.42 | 48.4 | HHHHHHHHHHHHHHHHHHHHHHHHHHHHHHHHCCCCCCCC   |
| 500 | EEEEKRFLEQLNNEEEDQRYQKEGFGKHS    | -46.42 | 45.2 | HHHHHHHHHHHHHHHHHHHHHHHHHHHHHHHHCCCCCCCC   |
| 507 | EEEEKRFLEQMKNEKEDEEYQRRGMGKHP    | -46.42 | 41.9 | HHHHHHHHHHHHHHHHHHHHHHHHHHHHHHHHCCCCCCCC   |
| 971 | EEEEKRFLEQQSNEEEDQRYQQQGFKGHS    | -46.42 | 41.9 | HHHHHHHHHHHHHHHHHHHHHHHHHHHHHHHHCCCCCCCC   |
| 084 | EEEEKRFLEQYNNEAEDEQYQQRGMGKHP    | -46.42 | 48.4 | HHHHHHHHHHHHHHHHHHHHHHHHHHHHHHHHCCCCCCCC   |
| 631 | EEEEKRFLEQYNNEAEDQRYQQQGFKGHS    | -46.42 | 48.4 | HHHHHHHHHHHHHHHHHHHHHHHHHHHHHHHHCCCCCCCC   |
| 027 | EEEEKRFLEQYNNEAEDQRYQREGMGKHP    | -46.42 | 48.4 | HHHHHHHHHHHHHHHHHHHHHHHHHHHHHHHHCCCCCCCC   |
| 423 | EEEEKRFLEQYNNEAEDQRYQRQGFKGHS    | -46.42 | 48.4 | HHHHHHHHHHHHHHHHHHHHHHHHHHHHHHHHCCCCCCCC   |
| 862 | EEEEKRFLEQYNNEAEDQRYQRYGFGKHS    | -46.42 | 48.4 | HHHHHHHHHHHHHHHHHHHHHHHHHHHHHHHHCCCCCCCC   |
| 424 | EEEEKRFLEQYNNEEDMKRYQREGKGS      | -46.42 | 45.2 | HHHHHHHHHHHHHHHHHHHHHHHHHHHHHHHHCCCCCCCC   |
| 322 | EEEEKRFLEQYNNEHEDEQRYQQQGMGKHP   | -46.42 | 45.2 | HHHHHHHHHHHHHHHHHHHHHHHHHHHHHHHHCCCCCCCC   |
| 302 | EEEEKRFLEQYNNEHEDEQRYQREGFGKHS   | -46.42 | 45.2 | HHHHHHHHHHHHHHHHHHHHHHHHHHHHHHHHCCCCCCCC   |
| 485 | EEEEKRFLEQYNNESEDERYQQQGFKGHS    | -46.42 | 45.2 | HHHHHHHHHHHHHHHHHHHHHHHHHHHHHHHHCCCCCCCC   |
| 924 | EEEEKRFLEQYNNESEDERYQQQGMGKHP    | -46.42 | 45.2 | HHHHHHHHHHHHHHHHHHHHHHHHHHHHHHHHCCCCCCCC   |
| 821 | EEEEKRFLEQYNNESEDQRYQKEGFGKHS    | -46.42 | 45.2 | HHHHHHHHHHHHHHHHHHHHHHHHHHHHHHHHCCCCCCCC   |
| 793 | EEEEKRFLEQYNNESEDQRYQRYGFGKHS    | -46.42 | 45.2 | HHHHHHHHHHHHHHHHHHHHHHHHHHHHHHHHCCCCCCCC   |
| 342 | EEEEKRFLEQYNNESEDQRYQRYGMGKHP    | -46.42 | 45.2 | HHHHHHHHHHHHHHHHHHHHHHHHHHHHHHHHCCCCCCCC   |
| 295 | EEEEKRFLEQYNNESEDSRYQQQGMGKHP    | -46.42 | 45.2 | HHHHHHHHHHHHHHHHHHHHHHHHHHHHHHHHCCCCCCCC   |
| 629 | EEEEKRFLEQYNNEYEDEEYQRKGRGKHSN   | -46.42 | 45.2 | HHHHHHHHHHHHHHHHHHHHHHHHHHHHHHHHCCCCCCCC   |
| 336 | EEEEKRFLEQYNNEYEDEEYQRKGRGKHP    | -46.42 | 45.2 | HHHHHHHHHHHHHHHHHHHHHHHHHHHHHHHHCCCCCCCC   |
| 838 | EEEEKRFLEQYNNEYEDEEYQRKGRGKHS    | -46.42 | 45.2 | HHHHHHHHHHHHHHHHHHHHHHHHHHHHHHHHCCCCCCCC   |
| 963 | EEEEKRFLEQYNNEYEDEEYQRNRGRGKHSY  | -46.42 | 45.2 | HHHHHHHHHHHHHHHHHHHHHHHHHHHHHHHHCCCCCCCC   |
| 921 | EEEEKRFLEQYNNEYEDEEYQRTGRGKHSF   | -46.42 | 45.2 | HHHHHHHHHHHHHHHHHHHHHHHHHHHHHHHHCCCCCCCC   |
| 230 | EEEEKRFLEQYNNEYEDQYYQQQGMGKHP    | -46.42 | 45.2 | HHHHHHHHHHHHHHHHHHHHHHHHHHHHHHHHCCCCCCCC   |
| 669 | EEEEKRFLEQYNNEYEDQYYQNGQKGSY     | -46.42 | 45.2 | HHHHHHHHHHHHHHHHHHHHHHHHHHHHHHHHCCCCCCCC   |
| 183 | EEEQRKFEEQRNNEEEDSRYQQQGWGKHTP   | -46.42 | 41.9 | HHHHHHHHHHHHHHHHHHHHHHHHHHHHHHHHCCCCCCCC   |
| 242 | EEEQRKFLEQYNNEYEDEQYQQQGWGKGNP   | -46.42 | 45.2 | CHHHHHHHHHHHHHHHHHHHHHHHHHHHHHHHCCCCCCCC   |
| 063 | EEERRKFLEQQNNEEEDERYQQQGFKGKHSN  | -46.42 | 45.2 | HHHHHHHHHHHHHHHHHHHHHHHHHHHHHHHHCCCCCCCC   |
| 480 | EQEKRKFLEQFNNEFEDQYYQQKGGKGS     | -46.42 | 45.2 | HHHHHHHHHHHHHHHHHHHHHHHHHHHHHHHHCCCCCCCC   |
| 907 | EQEKRKFLEQYNNEHEDEERYQQQGMGKHP   | -46.42 | 41.9 | HHHHHHHHHHHHHHHHHHHHHHHHHHHHHHHHCCCCCCCC   |
| 740 | EQEKRKFLEQYNNEYEDEEYQQTGRGKHP    | -46.42 | 41.9 | HHHHHHHHHHHHHHHHHHHHHHHHHHHHHHHHCCCCCCCC   |
| 529 | EQEKRKFLEQYNNEYEDEEYQRKGRGKHS    | -46.42 | 41.9 | HHHHHHHHHHHHHHHHHHHHHHHHHHHHHHHHCCCCCCCC   |



|     |                                 |        |      |                                |
|-----|---------------------------------|--------|------|--------------------------------|
| 532 | EEEEKKMLEQFNNEYEDQYYQQKGFQKQ    | -46.03 | 48.4 | HHHHHHHHHHHHHHHHHHHHHHHHHHHHHH |
| 496 | EEEEKKMLEQFNNEYEDQYYQQKGFQKQ    | -46.03 | 48.4 | HHHHHHHHHHHHHHHHHHHHHHHHHHHHHH |
| 396 | EEEEKKMLEQINNEAEDKRYQREGKKGHSA  | -46.03 | 48.4 | HHHHHHHHHHHHHHHHHHHHHHHHHHHHHH |
| 034 | EEEEKKMLEQINNEAEDQRYQKEGMGKHQP  | -46.03 | 48.4 | HHHHHHHHHHHHHHHHHHHHHHHHHHHHHH |
| 805 | EEEEKKMLEQINNEEEDERYQQQGFQKQ    | -46.03 | 45.2 | HHHHHHHHHHHHHHHHHHHHHHHHHHHHHH |
| 818 | EEEEKKMLEQINNEEEDERYQQQGMGKHQP  | -46.03 | 45.2 | HHHHHHHHHHHHHHHHHHHHHHHHHHHHHH |
| 521 | EEEEKKMLEQINNEEEDKRYQREGKKGHSS  | -46.03 | 45.2 | HHHHHHHHHHHHHHHHHHHHHHHHHHHHHH |
| 092 | EEEEKKMLEQINNEEEDKRYQQQGWGKHNP  | -46.03 | 45.2 | HHHHHHHHHHHHHHHHHHHHHHHHHHHHHH |
| 125 | EEEEKKMLEQINNEEEDKRYQQYGFQKQ    | -46.03 | 45.2 | HHHHHHHHHHHHHHHHHHHHHHHHHHHHHH |
| 367 | EEEEKKMLEQINNEEEDKRYQREGFGKQ    | -46.03 | 45.2 | HHHHHHHHHHHHHHHHHHHHHHHHHHHHHH |
| 119 | EEEEKKMLEQINNEEEDKRYQREGMGKHQP  | -46.03 | 45.2 | HHHHHHHHHHHHHHHHHHHHHHHHHHHHHH |
| 402 | EEEEKKMLEQINNEEEDKRYQRYGFQKQ    | -46.03 | 45.2 | HHHHHHHHHHHHHHHHHHHHHHHHHHHHHH |
| 662 | EEEEKKMLEQINNEEEDQRYQRYGFQKQ    | -46.03 | 45.2 | HHHHHHHHHHHHHHHHHHHHHHHHHHHHHH |
| 647 | EEEEKKMLEQINNEEEDQRYQRYGMGKHQP  | -46.03 | 45.2 | HHHHHHHHHHHHHHHHHHHHHHHHHHHHHH |
| 714 | EEEEKKMLEQINNEKEDEEYQQRGMGKHQP  | -46.03 | 45.2 | HHHHHHHHHHHHHHHHHHHHHHHHHHHHHH |
| 835 | EEEEKKMLEQINNEKEDEEYQRYGFQKQ    | -46.03 | 45.2 | HHHHHHHHHHHHHHHHHHHHHHHHHHHHHH |
| 742 | EEEEKKMLEQYNNEAEDQRYQRYGMGKHQP  | -46.03 | 48.4 | HHHHHHHHHHHHHHHHHHHHHHHHHHHHHH |
| 419 | EEEEKKMLEQYNNEFEDQYQRTGMGKHQP   | -46.03 | 45.2 | HHHHHHHHHHHHHHHHHHHHHHHHHHHHHH |
| 899 | EEEEKKMLEQYNNEEEDQRYQQQGFQKQ    | -46.03 | 45.2 | HHHHHHHHHHHHHHHHHHHHHHHHHHHHHH |
| 162 | EEEEKKMLEQYNNESEDKRYQQQGFQKQ    | -46.03 | 45.2 | HHHHHHHHHHHHHHHHHHHHHHHHHHHHHH |
| 876 | EEEEKKMLEQYNNEYEDEEYQRKGRGKHQS  | -46.03 | 45.2 | HHHHHHHHHHHHHHHHHHHHHHHHHHHHHH |
| 503 | EEEEKKMLEQYNNEYEDKRYQQKGFQKQ    | -46.03 | 45.2 | HHHHHHHHHHHHHHHHHHHHHHHHHHHHHH |
| 987 | EEEEKKMLEQYNNEYEDQYQQKGMGKHQP   | -46.03 | 48.4 | HHHHHHHHHHHHHHHHHHHHHHHHHHHHHH |
| 684 | EEEEKRMLEQINNEEEDERYQQQGFQKQ    | -46.03 | 41.9 | HHHHHHHHHHHHHHHHHHHHHHHHHHHHHH |
| 564 | EEEEKRMLEQINNEEEDKRYQREGFGKHQS  | -46.03 | 41.9 | HHHHHHHHHHHHHHHHHHHHHHHHHHHHHH |
| 045 | EEEEKRMLEQINNEEEDKRYQREGMGKHQP  | -46.03 | 41.9 | HHHHHHHHHHHHHHHHHHHHHHHHHHHHHH |
| 366 | EEEEKRMLEQINNEEEDQRYQQYGFQKQ    | -46.03 | 41.9 | HHHHHHHHHHHHHHHHHHHHHHHHHHHHHH |
| 454 | EEEEKRMLEQINNEEEDQRYQQYGMGKHQP  | -46.03 | 41.9 | HHHHHHHHHHHHHHHHHHHHHHHHHHHHHH |
| 981 | EEEEKRMLEQINNEEEDQRYQRYGFQKQ    | -46.03 | 41.9 | HHHHHHHHHHHHHHHHHHHHHHHHHHHHHH |
| 054 | EEEEKRMLEQINNEEEDQRYQRYGFQKQ    | -46.03 | 41.9 | HHHHHHHHHHHHHHHHHHHHHHHHHHHHHH |
| 506 | EEEEKRMLEQINNEKEDEEYQYRSGQKQ    | -46.03 | 45.2 | HHHHHHHHHHHHHHHHHHHHHHHHHHHHHH |
| 307 | EEEEKRMLEQINNEEEDERYQQQGMGKHQP  | -46.03 | 41.9 | HHHHHHHHHHHHHHHHHHHHHHHHHHHHHH |
| 720 | EEEEKRMLEQINNEQEDERYQRYQGWGKHNP | -46.03 | 41.9 | HHHHHHHHHHHHHHHHHHHHHHHHHHHHHH |
| 255 | EEEEKRMLEQINNEQEDQRYQQYGMGKHQP  | -46.03 | 41.9 | HHHHHHHHHHHHHHHHHHHHHHHHHHHHHH |
| 538 | EEEEKRMLEQYNNEEEDMKRYQREGMGKHQP | -46.03 | 41.9 | HHHHHHHHHHHHHHHHHHHHHHHHHHHHHH |
| 767 | EEEEKRMLEQYNNEYEDKRYQKEFGKQ     | -46.03 | 41.9 | HHHHHHHHHHHHHHHHHHHHHHHHHHHHHH |
| 940 | EEEEKRMLEQYNNEYEDQYQYRNRGKQ     | -46.03 | 41.9 | HHHHHHHHHHHHHHHHHHHHHHHHHHHHHH |
| 926 | EEEEQRMLEQINNEAEDKRYQREGMGKHQP  | -46.03 | 45.2 | HHHHHHHHHHHHHHHHHHHHHHHHHHHHHH |
| 655 | EQEKRMLEQFNNEYEDKRYQQKGFQKQ     | -46.03 | 41.9 | HHHHHHHHHHHHHHHHHHHHHHHHHHHHHH |
| 328 | EQEKRMLEQINNEEEDKRYQRQGFQKQ     | -46.03 | 38.7 | HHHHHHHHHHHHHHHHHHHHHHHHHHHHHH |
| 897 | EEERRKQLEKYNNESEQERYQQQGMQKHQP  | -46.02 | 38.7 | HHHHHHHHHHHHHHHHHHHHHHHHHHHHHH |
| 816 | EEEEKRFLEKFNNEYEDKRYQQKGFQKQ    | -46.01 | 48.4 | HHHHHHHHHHHHHHHHHHHHHHHHHHHHHH |
| 573 | EEEEKRFLEKYEDEEYQRKGRGKHQS      | -46.01 | 45.2 | HHHHHHHHHHHHHHHHHHHHHHHHHHHHHH |
| 151 | EEERKKQLEQINNEEEDKRYQREGFGKHQS  | -46.00 | 45.2 | HHHHHHHHHHHHHHHHHHHHHHHHHHHHHH |
| 262 | EEERKKQLEQINNEEEDKRYQREGVGKHNP  | -46.00 | 45.2 | HHHHHHHHHHHHHHHHHHHHHHHHHHHHHH |
| 618 | EEERKKQLEQINNEEEDQRYQREGVGKHQP  | -46.00 | 45.2 | HHHHHHHHHHHHHHHHHHHHHHHHHHHHHH |
| 668 | EEERKKQLEQYNNEHEDEEYQQGFQKQ     | -46.00 | 45.2 | HHHHHHHHHHHHHHHHHHHHHHHHHHHHHH |
| 761 | EEERKKQLEQFNNEYEDQYQYRGRGKHQP   | -46.00 | 45.2 | HHHHHHHHHHHHHHHHHHHHHHHHHHHHHH |
| 773 | EEERKKQLEQINNEAEDERYQQQGFQKQ    | -46.00 | 45.2 | HHHHHHHHHHHHHHHHHHHHHHHHHHHHHH |
| 490 | EEERKKQLEQINNEAEDERYQQQGMGKHQP  | -46.00 | 45.2 | HHHHHHHHHHHHHHHHHHHHHHHHHHHHHH |
| 197 | EEERKKQLEQINNEAEDKRYQREGMGKHQP  | -46.00 | 45.2 | HHHHHHHHHHHHHHHHHHHHHHHHHHHHHH |
| 772 | EEERKKQLEQINNEAEDKRYQREGQKQ     | -46.00 | 45.2 | HHHHHHHHHHHHHHHHHHHHHHHHHHHHHH |
| 018 | EEERKKQLEQINNEAEDKRYQRQGFQKQ    | -46.00 | 45.2 | HHHHHHHHHHHHHHHHHHHHHHHHHHHHHH |
| 199 | EEERKKQLEQINNEAEDQRYQRQGFQKQ    | -46.00 | 45.2 | HHHHHHHHHHHHHHHHHHHHHHHHHHHHHH |
| 585 | EEERKKQLEQINNEAEDQRYQRYGMGKHQP  | -46.00 | 45.2 | HHHHHHHHHHHHHHHHHHHHHHHHHHHHHH |
| 559 | EEERKKQLEQINNEEEDERYQQQGGKQ     | -46.00 | 41.9 | HHHHHHHHHHHHHHHHHHHHHHHHHHHHHH |
| 646 | EEERKKQLEQINNEEEDKRYQRVGRGKHQS  | -46.00 | 41.9 | HHHHHHHHHHHHHHHHHHHHHHHHHHHHHH |
| 112 | EEERKKQLEQINNEKEDEEYQRRMGKHQP   | -46.00 | 41.9 | HHHHHHHHHHHHHHHHHHHHHHHHHHHHHH |
| 185 | EEERKKQLEQINNEKEDEEYQRYGFQKQ    | -46.00 | 41.9 | HHHHHHHHHHHHHHHHHHHHHHHHHHHHHH |
| 663 | EEERKKQLEQINNEQEDQYQYQGMGKHQP   | -46.00 | 41.9 | HHHHHHHHHHHHHHHHHHHHHHHHHHHHHH |
| 681 | EEERKKQLEQINNEKEDEEYQKGRGKHQP   | -46.00 | 38.7 | HHHHHHHHHHHHHHHHHHHHHHHHHHHHHH |
| 133 | EQERRKQLEQYNNEYEDQYYQQKQKQ      | -46.00 | 38.7 | HHHHHHHHHHHHHHHHHHHHHHHHHHHHHH |
| 175 | EEEEKRFLEKFNNEYEHKYQKQKGFQKQ    | -45.99 | 41.9 | HHHHHHHHHHHHHHHHHHHHHHHHHHHHHH |
| 535 | EEERKKQLEQYNNESEDERYQQQGMGKHQP  | -45.98 | 38.7 | HHHHHHHHHHHHHHHHHHHHHHHHHHHHHH |
| 652 | EEEQRKFLEKYNNESEDKRYQQQGFQKQ    | -45.94 | 54.8 | CHHHHHHHHHHHHHHHHHHHHHHHHHHHHH |
| 708 | EEEEKRFLEKYNNESEDQYQKGFQKQ      | -45.94 | 45.2 | HHHHHHHHHHHHHHHHHHHHHHHHHHHHHH |
| 169 | EEEEKRLLEQINNEAEDQRYQQQGFQKQ    | -45.93 | 51.6 | HHHHHHHHHHHHHHHHHHHHHHHHHHHHHH |

|     |                                  |        |      |                                      |
|-----|----------------------------------|--------|------|--------------------------------------|
| 042 | EEEKRRKQLEQYNQYEYEQEYQRVGRGQGHQF | -45.92 | 35.5 | HHHHHHHHHHHHHHHHHHHHHHHHHHHHHHCCCC   |
| 970 | EEEKRKLLDQINQEAEQKRYQREGMGQGHQP  | -45.92 | 41.9 | HHHHHHHHHHHHHHHHHHHHHHHHHHHHHHCCCC   |
| 730 | EQEKRHILEQYNQYEYEDDEYQKGRGKGHQP  | -45.92 | 38.7 | HHHHHHHHHHHHHHHHHHHHHHHHHHHHHHCCCC   |
| 364 | EEEEERKQFQYNNNEYEDDEYQKGRGKGHQP  | -45.90 | 41.9 | CHHHHHHHHHHHHHHHHHHHHHHHHHHHHHCCCC   |
| 842 | EEEKRKFLEQFNNEYEDQFYQKEGFGKQHQS  | -45.90 | 51.6 | HHHHHHHHHHHHHHHHHHHHHHHHHHHHHHCCCC   |
| 420 | EEEKKLKLLDQINQEAEQKRYQRYGFGQGDSR | -45.90 | 51.6 | HHHHHHHHHHHHHHHHHHHHHHHHHHHHHHCCCC   |
| 698 | EEEKRKLLEQIQKDREDREYQREGMGKGHQP  | -45.90 | 35.5 | HHHHHHHHHHHHHHHHHHHHHHHHHHHHHHCCCC   |
| 650 | EEEKMKMLEKINNEAEDKRYQREGFGKGNQN  | -45.86 | 51.6 | HHHHHHHHHHHHHHHHHHHHHHHHHHHHHHCCCC   |
| 806 | EEEKMKMLDKINNEAEDKRYQRYGGMGQGHQP | -45.85 | 48.4 | HHHHHHHHHHHHHHHHHHHHHHHHHHHHHHCCCC   |
| 823 | EEEKMKMLEKFNQYEDDKYYQQKGFQGGDSR  | -45.85 | 58.1 | HHHHHHHHHHHHHHHHHHHHHHHHHHHHHHCCCC   |
| 654 | EEERRKQLEKINNEQEDKSYQRHGFGKGNNS  | -45.83 | 45.2 | HHHHHHHHHHHHHHHHHHHHHHHHHHHHHHCCCC   |
| 229 | EEEKKFLEQYNNNEDEQRYQRYGFGKQHQN   | -45.82 | 48.4 | HHHHHHHHHHHHHHHHHHHHCHHHHHHHHHHHCCCC |
| 978 | EEEWKLLDQIKNEKEQEEYQRRGLGQGHQP   | -45.82 | 41.9 | HHHHHHHHHHHHHHHHHHHHHHHHHHHHHHCCCC   |
| 278 | EEERRKQLEKINQEEDKRYQREGFGKGDSR   | -45.82 | 51.6 | HHHHHHHHHHHHHHHHHHHHHHHHHHHHHHCCCC   |
| 508 | EEEKRMLEQINNEEDKRYQREGFGKGHSH    | -45.80 | 41.9 | HHHHHHHHHHHHHHHHHHHHHHHHHHHHHHCCCC   |
| 012 | EEEKRMLEQYNNNEYEDQYQKEGFGKQHQS   | -45.79 | 41.9 | HHHHHHHHHHHHHHHHHHHHHHHHHHHHHHCCCC   |
| 263 | EEEKRKFLLDKKNNEEQKRYQYQYGQGHSH   | -45.77 | 45.2 | HHHHHHHHHHCHHHHHHHHHHHHHHHHHHHCCCC   |
| 106 | EEEKRKFLLDKYNNEAEDKRYQRYGFGQGHQS | -45.77 | 48.4 | HHHHHHHHHHHHHHHHHHHHHHHHHHHHHHCCCC   |
| 985 | EEEQKQLEQFNNEDEQFYQQGGFGQGHQS    | -45.76 | 38.7 | HHHHHHHHHHHHHHHHHHHHHHHHHHHHHHCCCC   |
| 215 | EEEKRKLLEQINNEAEDKRYQRYGFGKGSR   | -45.74 | 51.6 | HHHHHHHHHHHHHHHHHHHHHHHHHHHHHHCCCC   |
| 505 | EEEKRKLLEQINNEEDKRYQREGFGKGDSR   | -45.74 | 48.4 | HHHHHHHHHHHHHHHHHHHHHHHHHHHHHHCCCC   |
| 470 | EEEKRKLLDQINNEYEQRYQKRGFGQGHQS   | -45.72 | 38.7 | HHHHHHHHHHHHHHHHHHHHHHHHHHHHHHCCCC   |
| 693 | EEEEKRQEQYNNEYEDQEQYQRTGRGKGHQP  | -45.72 | 41.9 | HHHHHHHHHHHHHHHHHHHHHHHHHHHHHHCCCC   |
| 174 | EEEKRKLLDKINQEAEQRYQREGMGQGHQP   | -45.71 | 45.2 | HHHHHHHHHHHHHHHHHHHHHHHHHHHHHHCCCC   |
| 021 | EEEKRKMLEQINNEAEDKRYQYQGMGKQHQP  | -45.70 | 45.2 | HHHHHHHHHHHHHHHHHHHHHHHHHHHHHHCCCC   |
| 149 | EEEKRKFLEQFNNEEDKRYQREGFGKGSR    | -45.69 | 54.8 | HHHHHHHHHHHHHHHHHHHHHHHHHHHHHHCCCC   |
| 775 | EEEKRKFLEQYNNEYEDEFYQQKGFQGGDSR  | -45.69 | 54.8 | HHHHHHHHHHHHHHHHHHHHHHHHHHHHHHCCCC   |
| 885 | EEEKMKMLEQINNEDEYQRYQKGMGKGHQP   | -45.67 | 41.9 | HHHHHHHHHHHHHHHHHHHHHHHHHHHHHHCCCC   |
| 418 | EEEKRKILEQINQEKEQEFQRRGMGQKQP    | -45.65 | 32.3 | HHHHHHHHHHHHHHHHHHHHHHHHHHHHHHCCCC   |
| 728 | EEEKRKMLDQYNNEYEDDEYQKGRGKGHQS   | -45.64 | 45.2 | HHHHHHHHHHHHHHHHHHHHHHHHHHHHHHCCCC   |
| 837 | EEERKQLEQKNNNEEQERYQQGGFGQGHQS   | -45.63 | 38.7 | HHHHHHHHHHCHHHHHHHHHHHHHHHHHHHCCCC   |
| 359 | EEERKQLEQYNNNEEQRYQYQGGWQGHNP    | -45.63 | 38.7 | HHHHHHHHHHHHHHHHHHHHHHHHHHHHHHCCCC   |
| 192 | EEERRKQLEQYNNEAEDQRYQKEGFGQGHQS  | -45.63 | 38.7 | HHHHHHHHHHHHHHHHHHHHHHHHHHHHHHCCCC   |
| 131 | EEERRKQLEQYNNEAEDQRYQYQYQGGQGHQS | -45.63 | 38.7 | HHHHHHHHHHHHHHHHHHHHHHHHHHHHHHCCCC   |
| 015 | EEEWKQMEQYNNEYEQEEYQKGRGQGHQS    | -45.63 | 35.5 | HHHHHHHHHHHHHHHHHHHHHHHHHHHHHHCCCC   |
| 026 | EEEKKLKLLDQINNEEQRYQREGFGKQGHSH  | -45.62 | 41.9 | HHHHHHHHHHCHHHHHHHHHHHHHHHHHHHCCCC   |
| 086 | EEEKRKLLDQINNEKEQEEYQRRGKGQGHSH  | -45.62 | 38.7 | HHHHHHHHHHHHHHHHHHHHHHHHHHHHHHCCCC   |
| 928 | EEQRKQLEQINQEEDKSYQRHGFGKGSR     | -45.60 | 51.6 | HHHHHHHHHHHHHHHHHHHHHHHHHHHHHHCCCC   |
| 943 | EEEKMKMLEKINNEEHEKRYQREGFGKGNQN  | -45.60 | 38.7 | HHHHHHHHHHHHHHHHHHHHHHHHHHHHHHCCCC   |
| 339 | EEQKKMLEQYNNEYEDQYQKGGQKGHSH     | -45.59 | 48.4 | HHHHHHHHHHHHHHHHHHHHHHHHHHHHHHCCCC   |
| 007 | EEERRKQLEKYNNEAEDRRFQRYGFGQKSN   | -45.56 | 38.7 | HHHHHHHHHHHHHHHHHHHHHHHHHHHHHHCCCC   |
| 697 | EEQKKFLEQFNQYEDDEYQKGRGKGDSR     | -45.54 | 61.3 | HHHHHHHHHHHHHHHHHHHHHHHHHHHHHHCCCC   |
| 351 | EEEKKFLLDQYNNEAEDQRYQYQGGFGQGHQS | -45.52 | 48.4 | HHHHHHHHHHHHHHHHHHHHHHHHHHHHHHCCCC   |
| 232 | EEEKKFLLDQYNNEEQMRYQREGFGQGHQS   | -45.52 | 45.2 | HHHHHHHHHHCHHHHHHHHHHHHHHHHHHHCCCC   |
| 844 | EEEKKFLLDQYNNEEQRYQRYGGMGQGHQP   | -45.52 | 45.2 | HHHHHHHHHHHHHHHHHHHHCHHHHHHHHHHHCCCC |
| 850 | EEEKRKFLLDQYNNEAEDQRYQRYGFGQQHQN | -45.52 | 45.2 | HHHHHHHHHHHHHHHHHHHHHHHHHHHHHHCCCC   |
| 118 | EEEKRKFLLDQYNNEAEDQRYQRYGFGQGHQS | -45.52 | 45.2 | HHHHHHHHHHHHHHHHHHHHHHHHHHHHHHCCCC   |
| 560 | EEEKRKFLLDQYNNEHEQRYQYQGGFGQGHQS | -45.52 | 41.9 | HHHHHHHHHHHHHHHHHHHHHHHHHHHHHHCCCC   |
| 917 | EEEKRKFLLDQYNNEHEQRYQYQGGMGQGHQP | -45.52 | 41.9 | HHHHHHHHHHHHHHHHHHHHHHHHHHHHHHCCCC   |
| 517 | EEEKRKFLLDQYNNEYEQYQYQKGFQGGHQS  | -45.52 | 41.9 | HHHHHHHHHHHHHHHHHHHHHHHHHHHHHHCCCC   |
| 389 | EEEKMKMLEQINNEKEDQYQYQGGFGKGHQP  | -45.51 | 45.2 | HHHHHHHHHHHHHHHHHHHHHHHHHHHHHHCCCC   |
| 333 | EEEKRKFLLDQFNNEEQRYQYQGGKQGHSH   | -45.50 | 45.2 | HHHHHHHHHHHHHHHHHHHHHHHHHHHHHHCCCC   |
| 069 | EEEWKFFLEQYNNEYEDDEYQKGRGKGNNS   | -45.49 | 45.2 | HHHHHHHHHHHHHHHHHHHHHHHHHHHHHHCCCC   |
| 898 | EEEKRKFLEQYNNEYEDDEYQKGRGKGNQN   | -45.48 | 45.2 | HHHHHHHHHHHHHHHHHHHHHHHHHHHHHHCCCC   |
| 872 | EEEKRKFLEQYNQEAEDKRYQRYGFGKGSR   | -45.47 | 54.8 | HHHHHHHHHHHHHHHHHHHHHHHHHHHHHHCCCC   |
| 597 | EEEKRKFLEQKNNEEDERYQQYGFGKGNNS   | -45.46 | 41.9 | HHHHHHHHHHHHHHHHHHHHHHHHHHHHHHCCCC   |
| 942 | EEEKRKQLEQYNNEYEQEEYQKGRGQGHQS   | -45.43 | 35.5 | HHHHHHHHHHHHHHHHHHHHHHHHHHHHHHCCCC   |
| 072 | EEEKRKLLEQLNNEKEDMRYQRYGFGKGSR   | -45.42 | 48.4 | HHHHHHHHHHHHHHHHHHHHHHHHHHHHHHCCCC   |
| 497 | EEEKMKMLEKINNEAEDRRYQKEGFGKQHQS  | -45.40 | 51.6 | HHHHHHHHHHHHHHHHHHHHHHHHHHHHHHCCCC   |
| 273 | EEEKRKMLEKINNEAEDRQYQRNGSGKGHSH  | -45.40 | 48.4 | HHHHHHHHHHHHHHHHHHHHHHHHHHHHHHCCCC   |
| 184 | EEEKRKMLEKINNEAEDRRYQQGGMGKGHQP  | -45.40 | 48.4 | HHHHHHHHHHHHHHHHHHHHHHHHHHHHHHCCCC   |
| 223 | EEEWKLEQLNQEKEQRYQREGMGQGHQP     | -45.40 | 38.7 | HHHHHHHHHHHHHHHHHHHHHHHHHHHHHHCCCC   |
| 840 | EEEKRKMLQYINNEEDSRYQQGGFGKQHQS   | -45.39 | 41.9 | HHHHHHHHHHHHHHHHHHHHHHHHHHHHHHCCCC   |
| 886 | EEEKRKMLQYINNEKEDDEYQRYGGMGKGHQP | -45.39 | 41.9 | HHHHHHHHHHHHHHHHHHHHHHHHHHHHHHCCCC   |
| 676 | EEEKRKFLEQYNNEYEHQRYQKGFGRGDSR   | -45.39 | 45.2 | HHHHHHHHHHHHHHHHHHHHHHHHHHHHHHCCCC   |
| 324 | EEERRKQLEKYNNEEQMRYQREGFGQGSR    | -45.39 | 45.2 | HHHHHHHHHHCHHHHHHHHHHHHHHHHHHHCCCC   |
| 349 | EEEKRKMLEQINQEAEDERYQQGGFGKGNQN  | -45.39 | 45.2 | HHHHHHHHHHHHHHHHHHHHHHHHHHHHHHCCCC   |



|     |                                  |        |      |                                          |
|-----|----------------------------------|--------|------|------------------------------------------|
| 463 | EEEEKRLLEKINQEAEQKQYQRSQGGHSS    | -45.39 | 45.2 | HHHHHHHHHHHHHHHHHHHHHHHHHHHHHHHCCCCCCCC  |
| 237 | EEEEKRLLEKINQEEQKRYQRYGFGGQHS    | -45.39 | 38.7 | HHHHHHHHHHHHHHHHHHHHHHHHHHHHHHHCCCCCCCC  |
| 294 | EEERRKQLEKINNEKEDKEYQKQGGFGKQDSR | -45.38 | 51.6 | HHHHHHHHHHHHHHHHHHHHHHHHHHHHHHHCCCCCCCC  |
| 202 | EEERRKQLEKLNNEKEDDRYQRYGFGKQHSN  | -45.38 | 45.2 | HHHHHHHHHHHHHHHHHHHHHHHHHHHHHHHCCCCCCCC  |
| 888 | EEEEKKMLDKYNNNEEQKRYQRYGFGGQHS   | -45.37 | 45.2 | HHHHHHHHHHHHHHHHHHHHHHHHHHHHHHHCCCCCCCC  |
| 491 | EEEEKRLLDQINNEAEQKRYQRYGFGGQDSR  | -45.36 | 48.4 | HHHHHHHHHHHHHHHHHHHHHHHHHHHHHHHCCCCCCCC  |
| 692 | EEEEKRWLEKLNNEKEDDRYQRYGFGKQHS   | -45.34 | 45.2 | HHHHHHHHHHHHHHHHHHHHHHHHHHHHHHHCCCCCCCC  |
| 453 | EEERRKQLEQFNQEYEQFYQQKGMGQGHQP   | -45.31 | 41.9 | HHHHHHHHHHHHHHHHHHHHHHHHHHHHHHHCCCCCCCC  |
| 522 | EEEEKRLLEKINNEKEHKEYQKQGGFGQDSR  | -45.30 | 45.2 | HHHHHHHHHHHHHHHHHHHHHHHHHHHHHHHCCCCCCCC  |
| 925 | EEEEKKMLEQINNEAEDKRYQREGFGKQDSR  | -45.29 | 54.8 | HHHHHHHHHHHHHHHHHHHHHHHHHHHHHHHCCCCCCCC  |
| 052 | EEEEKRMLEQINNEEEDQRYQQGGFGKQDSR  | -45.29 | 48.4 | HHHHHHHHHHHHHHHHHHHHHHHHHHHHHHHCCCCCCCC  |
| 599 | EEEQKRMLEQINNEKEDEEYQRYGFGKQDSR  | -45.29 | 48.4 | HHHHHHHHHHHHHHHHHHHHHHHHHHHHHHHCCCCCCCC  |
| 095 | EQEKRMLEQINNEKEDEEYQRYGFGKQDSR   | -45.29 | 45.2 | HHHHHHHHHHHHHHHHHHHHHHHHHHHHHHHCCCCCCCC  |
| 003 | EEEEKRLLEKINNEEQKRYQRYGFGGQHS    | -45.28 | 38.7 | HHHHHHHHHHHCHHHHHHHHHHHHHHHHHHHHCCCCCCCC |
| 741 | EEEEKRYLEQYNNEYEDEYQQGGFGKQDSR   | -45.28 | 48.4 | HHHHHHHHHHHHHHHHHHHHHHHHHHHHHHHCCCCCCCC  |
| 004 | EEERRKQLEQINNEEEDERYQQGGFGKQDSR  | -45.27 | 48.4 | HHHHHHHHHHHHHHHHHHHHHHHHHHHHHHHCCCCCCCC  |
| 632 | EEEEKKFLEQYEDERYDQRYQRNGRKGHSY   | -45.24 | 41.9 | HHHHHHHHHHHHHHHHHHHHHHHHHHHHHHHCCCCCCCC  |
| 261 | EEEEKRFLEQYEDERYDEYQRKGFQGGHQS   | -45.24 | 38.7 | HHHHHHHHHHHHHHHHHHHHHHHHHHHHHHHCCCCCCCC  |
| 848 | EEEEKRFLEQYNNNEEQRKRYQRYGFGKQSN  | -45.22 | 35.5 | HHHHHHHHHHHHHHHHHHHHHHHHHHHHHHHCCCCCCCC  |
| 077 | EEERRKQLDQINNEEQRYQRYGFGGQHS     | -45.22 | 38.7 | HHHHHHHHHHHCHHHHHHHHHHHHHHHHHHHHCCCCCCCC |
| 624 | EEEEKRFLEQYNNNEEDMRYQREGFGKQDSR  | -45.18 | 51.6 | HHHHHHHHHHHCHHHHHHHHHHHHHHHHHHHHCCCCCCCC |
| 479 | EEEWKFLQYNNNEYEDEEYQRKGFQGGHQS   | -45.18 | 51.6 | HHHHHHHHHHHHHHHHHHHHHHHHHHHHHHHCCCCCCCC  |
| 210 | EQEKRFLEQYNNRHEDEYRQQGGFGKQDSR   | -45.15 | 45.2 | HHHHHHHHHHHHHHHHHHHHHHHHHHHHHHHCCCCCCCC  |
| 849 | EEEEKKFLEAYNNRYDEEYQRNGRKGHSY    | -45.15 | 45.2 | HHHHHHHHHHHHHHHHHHHHHHHHHHHHHHHCCCCCCCC  |
| 208 | EEEEKRFLEQYNNRYDEEYQRTGRGKQDSR   | -45.14 | 48.4 | HHHHHHHHHHHHHHHHHHHHHHHHHHHHHHHCCCCCCCC  |
| 718 | EEEEKKMLDQINNEAEQKRYQRYGFGGQHS   | -45.13 | 45.2 | HHHHHHHHHHHHHHHHHHHHHHHHHHHHHHHCCCCCCCC  |
| 097 | EEEEKKMLDQINNEEQKRYQRYGFGGQHS    | -45.13 | 41.9 | HHHHHHHHHHHCHHHHHHHHHHHHHHHHHHHHCCCCCCCC |
| 040 | EEEEKRMLDQYNNNEEQMRYQREGFGGQHS   | -45.13 | 38.7 | HHHHHHHHHHHCHHHHHHHHHHHHHHHHHHHHCCCCCCCC |
| 518 | EEEEKRLLEKINNEEEDDRYQQGGFGKQDSR  | -45.11 | 51.6 | HHHHHHHHHHHHHHHHHHHHHHHHHHHHHHHCCCCCCCC  |
| 977 | EEERRKQLDQINNEKEQEYQRYGFGGQHS    | -45.11 | 38.7 | HHHHHHHHHHHHHHHHHHHHHHHHHHHHHHHCCCCCCCC  |
| 082 | EEEEKKILEQINNEAEQKRYQRYGFGGQHS   | -45.11 | 41.9 | HHHHHHHHHHHHHHHHHHHHHHHHHHHHHHHCCCCCCCC  |
| 827 | EEEEKRIEQLNNEKEDEEYQRRGMGQGHQP   | -45.11 | 35.5 | HHHHHHHHHHHHHHHHHHHHHHHHHHHHHHHCCCCCCCC  |
| 245 | EEEEKRIEQLNNEKEQEYQRRGMGQGHQP    | -45.11 | 35.5 | HHHHHHHHHHHHHHHHHHHHHHHHHHHHHHHCCCCCCCC  |
| 983 | EEEEKRIEQLNNEKEQRYQRYGFGGQHS     | -45.11 | 35.5 | HHHHHHHHHHHHHHHHHHHHHHHHHHHHHHHCCCCCCCC  |
| 961 | EQEERKIQEYQFNNEYEQEYQRYGFGGQHS   | -45.11 | 35.5 | HHHHHHHHHHHHHHHHHHHHHHHHHHHHHHHCCCCCCCC  |
| 778 | EEEEKRFLEQYNNNEEEDQRYQRYGFGKQSN  | -45.10 | 45.2 | HHHHHHHHHHHHHHHHHHHHHHHHHHHHHHHCCCCCCCC  |
| 950 | EEEEKKMLEQINNEAEDKRYQRYGFGKQSN   | -45.09 | 48.4 | HHHHHHHHHHHHHHHHHHHHHHHHHHHHHHHCCCCCCCC  |
| 043 | EEEEKRMLEQINNEAEDERYQRKGFQGGHQS  | -45.09 | 45.2 | HHHHHHHHHHHHHHHHHHHHHHHHHHHHHHHCCCCCCCC  |
| 829 | EEEEKRMLEQYNNNEEYQRYQRKGRGKQSN   | -45.09 | 41.9 | HHHHHHHHHHHHHHHHHHHHHHHHHHHHHHHCCCCCCCC  |
| 239 | EEEEKRLQEKLNNEKEQKRYQRYGFGGQHS   | -45.09 | 35.5 | HHHHHHHHHHHHHHHHHHHHHHHHHHHHHHHCCCCCCCC  |
| 715 | EEEEKRLQEKLNNEKEQKRYQRYGFGGQHS   | -45.09 | 35.5 | HHHHHHHHHHHHHHHHHHHHHHHHHHHHHHHCCCCCCCC  |
| 988 | EEEEKRLLEKINNEEQKRYQRYGFGGQHS    | -45.09 | 41.9 | HHHHHHHHHHHCHHHHHHHHHHHHHHHHHHHHCCCCCCCC |
| 411 | EEEEKRLLEKINNEAEQKRYQRYGFGGQHS   | -45.09 | 41.9 | HHHHHHHHHHHHHHHHHHHHHHHHHHHHHHHCCCCCCCC  |
| 947 | EEEEKRLLEKINNEEQKRYQREGFGGQHS    | -45.09 | 38.7 | HHHHHHHHHHHCHHHHHHHHHHHHHHHHHHHHCCCCCCCC |
| 915 | EEEEKRLLEKLNNEKEQKRYQRYGFGGQHS   | -45.09 | 38.7 | HHHHHHHHHHHHHHHHHHHHHHHHHHHHHHHCCCCCCCC  |
| 583 | EQEKRLLEKLNNEKEQKRYQREGMGQGHQP   | -45.09 | 35.5 | HHHHHHHHHHHHHHHHHHHHHHHHHHHHHHHCCCCCCCC  |
| 064 | EEEEKKFLDQFNNEFEQYQYQQGGFGGQHSN  | -45.05 | 48.4 | HHHHHHHHHHHHHHHHHHHHHHHHHHHHHHHCCCCCCCC  |
| 713 | EEEEKRFLEQYNNNEYEQEYQRTGRGQGHQP  | -45.05 | 41.9 | HHHHHHHHHHHHHHHHHHHHHHHHHHHHHHHCCCCCCCC  |
| 833 | EEERRKQLEQYNNNEAEQRYQRYGFGGQHS   | -45.02 | 38.7 | HHHHHHHHHHHHHHHHHHHHHHHHHHHHHHHCCCCCCCC  |
| 067 | EQEKRFLEKYNNEAEDKRYQRYGFGGQHS    | -44.95 | 48.4 | HHHHHHHHHHHHHHHHHHHHHHHHHHHHHHHCCCCCCCC  |
| 511 | EEEEKRWLDQLNNEKEQEYQRYGFGGQHS    | -44.92 | 38.7 | HHHHHHHHHHHHHHHHHHHHHHHHHHHHHHHCCCCCCCC  |
| 385 | EEEEKRMLDQINNEKEQEYQRRGMGQGHQP   | -44.90 | 38.7 | HHHHHHHHHHHHHHHHHHHHHHHHHHHHHHHCCCCCCCC  |
| 756 | EEERRKQLDKYNNQEYQEYQRYGFGGQDSR   | -44.89 | 48.4 | HHHHHHHHHHHHHHHHHHHHHHHHHHHHHHHCCCCCCCC  |
| 941 | EEEEKRLLEKINNEEQKRYQREGFGGQHS    | -44.86 | 38.7 | HHHHHHHHHHHCHHHHHHHHHHHHHHHHHHHHCCCCCCCC |
| 843 | EEEEKRFLEKYNNEYEDREYQRTGRGKQSN   | -44.86 | 48.4 | HHHHHHHHHHHHHHHHHHHHHHHHHHHHHHHCCCCCCCC  |
| 598 | EEEEKRFLEKYNNEYEQKEFQKEGFGGQKSN  | -44.85 | 38.7 | HHHHHHHHHHHHHHHHHHHHHHHHHHHHHHHCCCCCCCC  |
| 442 | EEEEKKMLEQINNEKEHEEKRYGFGGQKSN   | -44.83 | 35.5 | HHHHHHHHHHHHHHHHHHHHHHHHHHHHHHHCCCCCCCC  |
| 111 | EEEEKRMLEQINNEEHRKQREGFGGQKSN    | -44.83 | 32.3 | HHHHHHHHHHHHHHHHHHHHHHHHHHHHHHHCCCCCCCC  |
| 687 | EEEEKFLEKFNQEQRYQRYGFGGQHS       | -44.82 | 48.4 | HHHHHHHHHHHHHHHHHHHHHHHHHHHHHHHCCCCCCCC  |
| 979 | EEEEKRFLEKYNQEYQKEQKEGFGGQHS     | -44.82 | 41.9 | HHHHHHHHHHHHHHHHHHHHHHHHHHHHHHHCCCCCCCC  |
| 431 | EQEKRLLEQIENEREQRYQRYGFGGQSN     | -44.82 | 29.0 | HHHHHHHHHHHHHHHHHHHHHHHHHHHHHHHCCCCCCCC  |
| 516 | EEEEKKLEQIEQRREQEYQRYGFGGQHS     | -44.79 | 32.3 | HHHHHHHHHHHHHHHHHHHHHHHHHHHHHHHCCCCCCCC  |
| 347 | EEEEKKMLEQINNEEEDQRYQRYGFGGQDSR  | -44.78 | 51.6 | HHHHHHHHHHHHHHHHHHHHHHHHHHHHHHHCCCCCCCC  |
| 256 | EEEEKRMLEQINNEAEDQRYQRYGFGGQDSR  | -44.78 | 51.6 | HHHHHHHHHHHHHHHHHHHHHHHHHHHHHHHCCCCCCCC  |
| 722 | EEEEKRFLEQYNNNEEEDERYQRYGFGGQHS  | -44.78 | 45.2 | HHHHHHHHHHHHHHHHHHHHHHHHHHHHHHHCCCCCCCC  |
| 645 | EEEEKKMLQKINNEAEDDRYQREGKQGHSS   | -44.76 | 51.6 | HHHHHHHHHHHHHHHHHHHHHHHHHHHHHHHCCCCCCCC  |
| 314 | EEEEKKMLEQINNEAHRKQREGQGGQKSN    | -44.76 | 38.7 | HHHHHHHHHHHHHHHHHHHHHHHHHHHHHHHCCCCCCCC  |

|     |                                  |        |      |                                    |
|-----|----------------------------------|--------|------|------------------------------------|
| 910 | EEERRKQLEQINNEAEDKRYQRYGFGKDSR   | -44.76 | 51.6 | HHHHHHHHHHHHHHHHHHHHHHHHHHCCCCCCCC |
| 155 | EEERRKQLQKINNEAEDRRYQRYGFGKGHN   | -44.74 | 48.4 | HHHHHHHHHHHHHHHHHHHHHHHHHHCCCCCCCC |
| 531 | EEQKRKFLQFNNEYEDQFYQQKGFGKGD     | -44.74 | 61.3 | HHHHHHHHHHHHHHHHHHHHHHHHHHCCCCCCCC |
| 610 | EEERRKQLEQYNNEEQMRYQREGFGGQHS    | -44.73 | 35.5 | HHHHHHHHHHHHSCHHHHHHHHHHHHCCCCCCCC |
| 313 | EEQLKKLLEQINNEAEQKRYQREGKGQGHSH  | -44.67 | 45.2 | HHHHHHHHHHHHHHHHHHHHHHHHHHCCCCCCCC |
| 417 | EEKKKLELQINNEKEQEEFQRYGFGGKQ     | -44.65 | 35.5 | HHHHHHHHHHHHHHHHHHHHHHHHHHCCCCCCCC |
| 796 | EEELKKILEQLNNEKEQKRYQRYGFGQGHQ   | -44.63 | 38.7 | HHHHHHHHHHHHHHHHHHHHHHHHHHCCCCCCCC |
| 033 | EEKKKKLLEQINQEQEQEYQRKGRGQGHQ    | -44.62 | 38.7 | HHHHHHHHHHHHHHHHHHHHHHHHHHCCCCCCCC |
| 088 | EEKKKKLLEQINQEEEQRYQQQGGMGQGHQ   | -44.62 | 35.5 | HHHHHHHHHHHHHHHHHHHHHHHHHHCCCCCCCC |
| 797 | EEKKKKLEKINNEAEQKRYQREGKGQGHSS   | -44.62 | 45.2 | HHHHHHHHHHHHHHHHHHHHHHHHHHCCCCCCCC |
| 383 | EEKKKKLLEKINNEAEQRYQQQGGMGQGHQ   | -44.62 | 38.7 | HHHHHHHHHHHHHHHHHHHHHHHHHHCCCCCCCC |
| 103 | EEEWRLMEKYNNEEQKRYQREGMGQGHQ     | -44.62 | 35.5 | HHHHHHHHHHHHSCHHHHHHHHHHHHCCCCCCCC |
| 673 | EEKKKKLLEQINNEAEQKRFQREGKGQGHSH  | -44.58 | 35.5 | HHHHHHHHHHHHHHHHHHHHHHHHHHCCCCCCCC |
| 309 | EEQRRLYEQLNNEKEDQRYQRYGFGKGHSS   | -44.58 | 38.7 | HHHHHHHHHHHHHHHHHHHHHHHHHHCCCCCCCC |
| 754 | EEKKRMLDQINNEKEQEYQRYGFGGQGHQS   | -44.54 | 38.7 | HHHHHHHHHHHHHHHHHHHHHHHHHHCCCCCCCC |
| 090 | EEEARQQEQYNNESEQRYQQYGFGQGHSS    | -44.54 | 35.5 | HHHHHHHHHHHHHHHHHHHHHHHHHHCCCCCCCC |
| 694 | EEEARQFQEKYSNESEQRYQQQGFQGHQS    | -44.53 | 38.7 | HHHHHHHHHHHHHHHHHHHHHHHHHHCCCCCCCC |
| 124 | EEEEKKFQEKYNNESEQRYQRYGFGGQGHQS  | -44.53 | 41.9 | CHHHHHHHHHHHHHHHHHHHHHHHHHCCCCCCCC |
| 820 | EEEEKFQEKYNNEAEQKRYQRYGFGGQGHQ   | -44.53 | 41.9 | CHHHHHHHHHHHHHHHHHHHHHHHHHCCCCCCCC |
| 830 | EEKKKFLEKFNNEYEQEYYQNGSGQGHQY    | -44.53 | 48.4 | HHHHHHHHHHHHHHHHHHHHHHHHHHCCCCCCCC |
| 604 | EEKKRFLLEKFNNEYEQKYQQKGFGGQGHQS  | -44.53 | 45.2 | HHHHHHHHHHHHHHHHHHHHHHHHHHCCCCCCCC |
| 680 | EEKKRFLLEKFNNEYEQKYQQKGQGGQGHSH  | -44.53 | 45.2 | HHHHHHHHHHHHHHHHHHHHHHHHHHCCCCCCCC |
| 592 | EEKKRFLLEKMKNEKEQEYQRYGFGGQGHSS  | -44.53 | 38.7 | HHHHHHHHHHHHHHHHHHHHHHHHHHCCCCCCCC |
| 415 | EEKKRFLLEKYNNEAEQKRYQRYGFGGQGHQS | -44.53 | 45.2 | HHHHHHHHHHHHHHHHHHHHHHHHHHCCCCCCCC |
| 567 | EEKKKLEQIENEREQEYQRQGFGGQGHQ     | -44.49 | 35.5 | HHHHHHHHHHHHHHHHHHHHHHHHHHCCCCCCCC |
| 927 | EEKKRMLQQFNNEFEDQFYQQKGFGKGNSS   | -44.46 | 48.4 | HHHHHHHHHHHHHHHHHHHHHHHHHHCCCCCCCC |
| 677 | EEKKRLLQKINNEEQKRYQREGGQGHQ      | -44.45 | 38.7 | HHHHHHHHHHSCHHHHHHHHHHHHCCCCCCCC   |
| 306 | EEKKRMLQQINQEEEDQRYQRYGFGKGD     | -44.44 | 48.4 | HHHHHHHHHHHHHHHHHHHHHHHHHHCCCCCCCC |
| 435 | EEKKKMLEKINQEAQKRYQREGMGQGHQ     | -44.43 | 45.2 | HHHHHHHHHHHHHHHHHHHHHHHHHHCCCCCCCC |
| 606 | EEKKKMLEKINQEEQKRYQREGMGQGHQ     | -44.43 | 41.9 | HHHHHHHHHHHHHHHHHHHHHHHHHHCCCCCCCC |
| 287 | EEERRKQLEKLNQEKQRYQQYGFQGHQS     | -44.40 | 38.7 | HHHHHHHHHHHHHHHHHHHHHHHHHHCCCCCCCC |
| 630 | EEKKRMLDQYNNESEQRYQQYGFGGQDSR    | -44.40 | 45.2 | HHHHHHHHHHHHHHHHHHHHHHHHHHCCCCCCCC |
| 475 | EEKKKWLEKLNNEKEQKRYQRYGFGGQGHQ   | -44.39 | 41.9 | HHHHHHHHHHHHHHHHHHHHHHHHHHCCCCCCCC |
| 275 | EEKKKWLEKLNNEYEQEQYQRNGRQGHSS    | -44.39 | 41.9 | HHHHHHHHHHHHHHHHHHHHHHHHHHCCCCCCCC |
| 299 | EEKKRWLEKLNNEKEQERYQQQGGMGQGHQ   | -44.39 | 38.7 | HHHHHHHHHHHHHHHHHHHHHHHHHHCCCCCCCC |
| 992 | EEEWKWIKLNNEKEQEYQRKGRGQGHQS     | -44.39 | 35.5 | HHHHHHHHHHHHHHHHHHHHHHHHHHCCCCCCCC |
| 047 | EEEWKWIKLNNEKEQKRYQREGMGQGHQ     | -44.39 | 35.5 | HHHHHHHHHHHHHHHHHHHHHHHHHHCCCCCCCC |
| 563 | EQERRKQLEQYNNEAEQRYQRYGFGGQDSR   | -44.39 | 41.9 | HHHHHHHHHHHHHHHHHHHHHHHHHHCCCCCCCC |
| 911 | EEKKRFLQYNEEQMRYQREGFGGQDSR      | -44.35 | 45.2 | HHHHHHHHHHHHHHHHHHHHHHHHHHCCCCCCCC |
| 430 | EEKKKLELQINNEAEQKRYQKEGFGGQGHQS  | -44.32 | 41.9 | HHHHHHHHHHHHHHHHHHHHHHHHHHCCCCCCCC |
| 113 | EEKKKLELQINNEAEQKRYQRYGFGGQGHQS  | -44.32 | 41.9 | HHHHHHHHHHHHHHHHHHHHHHHHHHCCCCCCCC |
| 889 | EEKKKLELQINNEEQKRYQRYGFGGQGHQ    | -44.32 | 38.7 | HHHHHHHHHHSCHHHHHHHHHHHHCCCCCCCC   |
| 039 | EEKKKLELQINNEKEQEYQRRGMGQGHQ     | -44.32 | 38.7 | HHHHHHHHHHHHHHHHHHHHHHHHHHCCCCCCCC |
| 450 | EEKKKLELQINNEQERYQQQGWGQGHQ      | -44.32 | 38.7 | HHHHHHHHHHHHHHHHHHHHHHHHHHCCCCCCCC |
| 999 | EEKKRLELQINNEAEQKRYQREGWGQGHNP   | -44.32 | 38.7 | HHHHHHHHHHHHHHHHHHHHHHHHHHCCCCCCCC |
| 374 | EEKKRLELQINNEEQKRYQREGMGQGHQ     | -44.32 | 35.5 | HHHHHHHHHHSCHHHHHHHHHHHHCCCCCCCC   |
| 140 | EEKKRLELQINNEEQKRYQRQGFGGQGHQS   | -44.32 | 35.5 | HHHHHHHHHHSCHHHHHHHHHHHHCCCCCCCC   |
| 641 | EEKKRLELQINNEEQRYQQGFGGQGHQ      | -44.32 | 35.5 | HHHHHHHHHHSCHHHHHHHHHHHHCCCCCCCC   |
| 588 | EEKKRLELQINNEKEQEYQRRGMGQGHQ     | -44.32 | 35.5 | HHHHHHHHHHHHHHHHHHHHHHHHHHCCCCCCCC |
| 494 | EEKKRLELQINNEKEQEYQRYGFGGQGHQS   | -44.32 | 35.5 | HHHHHHHHHHHHHHHHHHHHHHHHHHCCCCCCCC |
| 269 | EEKKRLELQINNEKEQEYQKQGFGGQGHQS   | -44.32 | 35.5 | HHHHHHHHHHHHHHHHHHHHHHHHHHCCCCCCCC |
| 446 | EEKKRLELQINNEQEYQRKGRGQGHQ       | -44.32 | 35.5 | HHHHHHHHHHHHHHHHHHHHHHHHHHCCCCCCCC |
| 918 | EEKKRLELQINNEQEQKSQQGFGGQGHQS    | -44.32 | 35.5 | HHHHHHHHHHHHHHHHHHHHHHHHHHCCCCCCCC |
| 209 | EEKKRLELQINNEQEQKSQYREGMGQGHQ    | -44.32 | 35.5 | HHHHHHHHHHHHHHHHHHHHHHHHHHCCCCCCCC |
| 635 | EEKKRLELQINNEQEQQYYQYGFGGQGHSS   | -44.32 | 35.5 | HHHHHHHHHHHHHHHHHHHHHHHHHHCCCCCCCC |
| 308 | EEKKRLEQLNNEEQRYQRYGFGGQGHQS     | -44.32 | 35.5 | HHHHHHHHHHHHHHHHHHHHHHHHHHCCCCCCCC |
| 633 | EEELKKLLEQINNEEQKRYQRYGFGGQGHQS  | -44.32 | 38.7 | HHHHHHHHHHSCHHHHHHHHHHHHCCCCCCCC   |
| 216 | EQEKRLLEQLNNEKEQRYQRQGFGGQGHQS   | -44.32 | 32.3 | HHHHHHHHHHHHHHHHHHHHHHHHHHCCCCCCCC |
| 541 | EEERRKQLEKINNEKEQRYQQGFGGQGHQS   | -44.30 | 38.7 | HHHHHHHHHHHHHHHHHHHHHHHHHHCCCCCCCC |
| 994 | EEKKRFLLEKYNNESEQRYQQQGFQGHSS    | -44.30 | 41.9 | HHHHHHHHHHHHHHHHHHHHHHHHHHCCCCCCCC |
| 558 | EEKKRFLDQYNNEAEQRYQRYGFGGQDSR    | -44.29 | 51.6 | HHHHHHHHHHHHHHHHHHHHHHHHHHCCCCCCCC |
| 998 | EEEWKFLIQYNNDEYQRYQRKGRGQDSR     | -44.21 | 48.4 | HHHHHHHHHHHHSCHHHHHHHHHHHHCCCCCCCC |
| 828 | EEKKRMLLEKINNEAEQKRYQRYGFGGQGHQS | -44.20 | 41.9 | HHHHHHHHHHHHHHHHHHHHHHHHHHCCCCCCCC |
| 784 | EQEKRHLEKINNEAEDKRYQREGFGKGD     | -44.19 | 51.6 | HHHHHHHHHHHHHHHHHHHHHHHHHHCCCCCCCC |
| 176 | EQEKRFLEQYNNESEQRYQRYGFGGQGHQS   | -44.18 | 41.9 | HHHHHHHHHHHHSCHHHHHHHHHHHHCCCCCCCC |
| 171 | EEERRKQLDQINNEAEQRYQRYGFGGQGNSS  | -44.17 | 41.9 | HHHHHHHHHHHHHHHHHHHHHHHHHHCCCCCCCC |
| 053 | EEEWKLMADVNNREEQRYQQGQGHQ        | -44.15 | 32.3 | HHHHHHHHHHHHHHHHHHHHHHHHHHCCCCCCCC |





|     |                                   |        |      |                                       |
|-----|-----------------------------------|--------|------|---------------------------------------|
| 822 | EEQKRKMLEQINNEEEQKRYQREGVGGHQP    | -42.93 | 38.7 | HHHHHHHHHHCHHHHHHHHHHHCCCCCCC         |
| 864 | EEEKRKMLEKINNEAEQKRYQRQGGFGQGDSR  | -42.89 | 48.4 | HHHHHHHHHHHHHHHHHHHHHHHHHHHHHHCCCCCCC |
| 240 | EEEKKKMLEQINNRAEQERYQREGKGQGHSH   | -42.87 | 38.7 | HHHHHHHHHHHHHHHHHHHHHHHHHHHHHHCCCCCCC |
| 341 | EEERRKQLEKINNEEEQKRYQRYGFGQGHSS   | -42.87 | 45.2 | HHHHHHHHHHCHHHHHHHHHHHCCCCCCC         |
| 781 | EEERKKQLEQINNEAEQKRYQRYGFGQGHQS   | -42.87 | 38.7 | HHHHHHHHHHHHCHHHHHHHHHHHCCCCCCC       |
| 504 | EEERRKQLEQINNEAEQKRYQRYGFGQGHSS   | -42.87 | 38.7 | HHHHHHHHHHHHHHHHHHHHHHHHHHHHHHCCCCCCC |
| 354 | EEERRKQLEQINNEKEQQRYYQQGGFGQGHSS  | -42.87 | 35.5 | HHHHHHHHHHHHHHHHHHHHHHHHHHHHHHCCCCCCC |
| 766 | EEEKKKMLQQINNEKEQEYQRYGFGQGHQS    | -42.73 | 38.7 | HHHHHHHHHHHHHHHHHHHHHHHHHHHHHHCCCCCCC |
| 967 | EEEKRRLLEKINNEAEQKRYQQYGGFGQGHSS  | -42.68 | 41.9 | HHHHHHHHHHHHHHHHHHHHHHHHHHHHHHCCCCCCC |
| 544 | EEEKKKMLEQINNEQEQRYYQQGGFGQGDSR   | -42.64 | 45.2 | HHHHHHHHHHHHHHHHHHHHHHHHHHHHHHCCCCCCC |
| 965 | EQEKRMLEQFNNEYEQEYQRKGRGQGDSR     | -42.64 | 41.9 | HHHHHHHHHHHHHHHHHHHHHHHHHHHHHHCCCCCCC |
| 486 | EEEKRKFLEKFNNEYEQYYQKGGFGQGDSR    | -42.62 | 51.6 | HHHHHHHHHHHHHHHHHHHHHHHHHHHHHHCCCCCCC |
| 186 | EEEKKKFLEQYNNESEQQRYYQRYGFGQGDSR  | -42.52 | 48.4 | HHHHHHHHHHCHHHHHHHHHHHCCCCCCC         |
| 607 | EEEKRKFLEQYNNEYEQEYQRKGRGQGDSR    | -42.52 | 45.2 | HHHHHHHHHHHHHHHHHHHHHHHHHHHHHHCCCCCCC |
| 187 | EEEKRKFLEQYNNEYEQEYQRTGRGQGDSR    | -42.52 | 45.2 | HHHHHHHHHHHHHHHHHHHHHHHHHHHHHHCCCCCCC |
| 165 | EQEKRFLEQKNNEEQKRYQQYGGFGQGDSR    | -42.52 | 41.9 | HHHHHHHHHHCHHHHHHHHHHHCCCCCCC         |
| 032 | EEEKRKLEQIEEEERQKRYQREGFGQGHQS    | -42.49 | 29.0 | HHHHHHHHHHHHHHHHHHHHHHHHHHHHHHCCCCCCC |
| 050 | EEERKKQLEQINNEEQKRYQREGFGQGDSR    | -42.47 | 45.2 | HHHHHHHHHHCHHHHHHHHHHHCCCCCCC         |
| 452 | EEEKRKMLEQFNNEYEQEYQRKGRGQGNQN    | -42.43 | 38.7 | HHHHHHHHHHHHHHHHHHHHHHHHHHHHHHCCCCCCC |
| 361 | EEERRKQLEQINNEAEQKRYQREGKGQGNSN   | -42.41 | 38.7 | HHHHHHHHHHHHHHHHHHHHHHHHHHHHHHCCCCCCC |
| 896 | EEYRkWLEQFKNEYEQEYQKGGFGQGDSR     | -42.40 | 45.2 | HHHHHHHHHHHHHHHHHHHHHHHHHHHHHHCCCCCCC |
| 071 | EEYRkWLEQLKNEKEQEYQRRGKGQGDSR     | -42.40 | 38.7 | HHHHHHHHHHHHHHHHHHHHHHHHHHHHHHCCCCCCC |
| 765 | EEQKRKYLQQYNNEEQRQYQRSGMGQGHQP    | -42.31 | 41.9 | HHHHHHHHHHCHHHHHHHHHHHCCCCCCC         |
| 707 | EEEKRKFLEDYNNRSEDQRYQKEGFGKGNQN   | -42.26 | 41.9 | HHHHHHHHHHCHHHHHHHHHHHCCCCCCC         |
| 247 | EEEKRKFLEQFNNEYEQKRYQKEGFGQGDSR   | -42.20 | 51.6 | HHHHHHHHHHHHHHHHHHHHHHHHHHHHHHCCCCCCC |
| 136 | EEEKRKLEQINNEQEQRYYQRYQREGFGQGDSR | -42.09 | 41.9 | HHHHHHHHHHHHHHHHHHHHHHHHHHHHHHCCCCCCC |
| 218 | EQEKRHLEQISNEEQQRYYQRQGGFGQGHQS   | -42.09 | 29.0 | HHHHHHHHHHCHHHHHHHHHHHCCCCCCC         |
| 120 | EEEKKKMLEQINNQKEQEYQRYGFGQGDSR    | -42.05 | 41.9 | HHHHHHHHHHHHHHHHHHHHHHHHHHHHHHCCCCCCC |
| 337 | EEEKRKLEAINNREEQMYRQREGKGQGHSS    | -41.99 | 32.3 | HHHHHHHHHHHHHHHHHHHHHHHHHHHHHHCCCCCCC |
| 156 | EQERRKQLEQINQEEQQRYYQYGGFGQGDSR   | -41.50 | 38.7 | HHHHHHHHHHHHHHHHHHHHHHHHHHHHHHCCCCCCC |
| 658 | EQEKRFLEQFNNEKEQQYYQYGGFGQGHSS    | -41.05 | 38.7 | HHHHHHHHHHHHHHHHHHHHHHHHHHHHHHCCCCCCC |
| 408 | EEEKKFLDDYNNRSEQQRYYQRYGFGQGDSR   | -40.82 | 48.4 | HHHHHHHHHHHHHHHHHHHHHHHHHHHHHHCCCCCCC |

**Table S4. Summary of 877 peptide sequences designed using EvoEF2 and the evolutionary profile (weight = 0.75).**

| #label | #peptide                           | #binding (EEU) | #SeqID (%) | #Secondary structure                        |
|--------|------------------------------------|----------------|------------|---------------------------------------------|
| WT     | EEQAKTFLDKFNHEAEDLFYQSSGLGKGDFR    | -46.46         | 100.       | HHHHHHHHHHHHHHHHHHHHHHHHHHHHHHHHHHHCCCCCCCC |
| 376    | EEELKKILEKLNQEKEDMRYQRQGFQFQGHQS   | -49.06         | 48.4       | HHHHHHHHHHHHHHHHHHHHHHHHHHHHHHHHHCCCCCCCC   |
| 851    | EEELRKKILEKLNQEKEDMRYQRQGFQFQGHSS  | -49.06         | 45.2       | HHHHHHHHHHHHHHHHHHHHHHHHHHHHHHHHHCCCCCCCC   |
| 412    | EEELKLLDQINQEAEDMRYQRYGFQFQGHSS    | -49.05         | 51.6       | HHHHHHHHHHHHHHHHHHHHHHHHHHHHHHHHHCCCCCCCC   |
| 403    | EEELKLLDQINQEEEDMRYQQQGFQFQGHSA    | -49.05         | 45.2       | HHHHHHHHHHHHHHHHHHHHHHHHHHHHHHHHHCCCCCCCC   |
| 207    | EEELKLLDQINQEEEDMRYQRYGFQFQGHSS    | -49.05         | 45.2       | HHHHHHHHHHHHHHHHHHHHHHHHHHHHHHHHHCCCCCCCC   |
| 957    | EEELRKKLLDQINQEKEDMRYQRYGFQFQGHSA  | -49.05         | 45.2       | HHHHHHHHHHHHHHHHHHHHHHHHHHHHHHHHHCCCCCCCC   |
| 284    | EEELRKKLLDKINQEEEDMRYQQYGFQFQGHSDR | -49.03         | 54.8       | HHHHHHHHHHHHHHHHHHHHHHHHHHHHHHHHHCCCCCCCC   |
| 434    | EEELKFKFLQKYNNEEEDMRYQREGFGFQGHQS  | -49.02         | 51.6       | HHHHHHHHHHHHHHHHHHHHHHHHHHHHHHHHHCCCCCCCC   |
| 602    | EQELRKKILEKLNQEEDMRYQRYGFQFQGHSA   | -48.87         | 41.9       | HHHHHHHHHHHHHHHHHHHHHHHHHHHHHHHHHCCCCCCCC   |
| 816    | EEELRKKLLQVINNEAEDMRYQQQGFQFQGHSA  | -48.81         | 45.2       | HHHHHHHHHHHHHHHHHHHHHHHHHHHHHHHHHCCCCCCCC   |
| 843    | EEELKKKILEKLNNEAEDMRYQQQGFQFQGHSS  | -48.77         | 51.6       | HHHHHHHHHHHHHHHHHHHHHHHHHHHHHHHHHCCCCCCCC   |
| 113    | EEELKKKILEKLNNEAEDMRYQRYGFQFQGHSS  | -48.77         | 51.6       | HHHHHHHHHHHHHHHHHHHHHHHHHHHHHHHHHCCCCCCCC   |
| 793    | EEELKKKILEKLNNEEEDMRYQQYGFQFQGHSA  | -48.77         | 48.4       | HHHHHHHHHHHHHHHHHHHHHHHHHHHHHHHHHCCCCCCCC   |
| 426    | EEELKKKILEKLNNEEEDMRYQQYGFQFQGHSS  | -48.77         | 48.4       | HHHHHHHHHHHHHHHHHHHHHHHHHHHHHHHHHCCCCCCCC   |
| 638    | EEELRKKILEKLNNEEEDMRYQQQGFQFQGHSS  | -48.77         | 45.2       | HHHHHHHHHHHHHHHHHHHHHHHHHHHHHHHHHCCCCCCCC   |
| 417    | EEELRKKILEKLNNEEEDMRYQREGFGFQGHQA  | -48.77         | 45.2       | HHHHHHHHHHHHHHHHHHHHHHHHHHHHHHHHHCCCCCCCC   |
| 611    | EEEWKKILEKLNNEQEDMRYQQNGFQFQGHSA   | -48.77         | 48.4       | HHHHHHHHHHHHHHHHHHHHHHHHHHHHHHHHHCCCCCCCC   |
| 815    | EEELKLLDQINNEEEDMRYQRYGFQFQGHQS    | -48.77         | 48.4       | HHHHHHHHHHHHHHHHHHHHHHHHHHHHHHHHHCCCCCCCC   |
| 968    | EESLRKILDQINNEEEDMRYQQYGFQFQGHSS   | -48.76         | 45.2       | HHHHHHHHHHHHHHHHHHHHHHHHHHHHHHHHHCCCCCCCC   |
| 574    | EEELKLLDQLNNEQEDMRYQRKGFQFQGHSS    | -48.75         | 48.4       | HHHHHHHHHHHHHHHHHHHHHHHHHHHHHHHHHCCCCCCCC   |
| 139    | EEELRKKLLDQINNEAEDMRYQQQGFQFQGHSA  | -48.75         | 48.4       | HHHHHHHHHHHHHHHHHHHHHHHHHHHHHHHHHCCCCCCCC   |
| 838    | EEELRKKLLDQINNEEEDMRYQQYGFQFQGHSS  | -48.75         | 45.2       | HHHHHHHHHHHHHHHHHHHHHHHHHHHHHHHHHCCCCCCCC   |
| 972    | EEELRKKLLDQINNEEEDMRYQREGFGFQGHSA  | -48.75         | 45.2       | HHHHHHHHHHHHHHHHHHHHHHHHHHHHHHHHHCCCCCCCC   |
| 872    | EEELRKKLLDQINNEEEDMRYQRYGFQFQGHSA  | -48.75         | 45.2       | HHHHHHHHHHHHHHHHHHHHHHHHHHHHHHHHHCCCCCCCC   |
| 511    | EEELRKKLLDQLNNEEEDMRYQRQGFQFQGHSA  | -48.75         | 45.2       | HHHHHHHHHHHHHHHHHHHHHHHHHHHHHHHHHCCCCCCCC   |
| 841    | EEELRKKILEKLNNEEEDMRYQQYGFQFQGHSA  | -48.50         | 45.2       | HHHHHHHHHHHHHHHHHHHHHHHHHHHHHHHHHCCCCCCCC   |
| 591    | EEELRKFLLDQFNQYEDMRYQQKGFQFQGHSS   | -48.49         | 54.8       | HHHHHHHHHHHHHHHHHHHHHHHHHHHHHHHHHCCCCCCCC   |
| 243    | EEELRKFLLDQYNQEEEDMRYQREGFGFQGHSA  | -48.49         | 48.4       | HHHHHHHHHHHHHHHHHHHHHHHHHHHHHHHHHCCCCCCCC   |
| 026    | EEELRKFLLDQFNQYEDMRYQQKGFQFQGHSS   | -48.25         | 51.6       | HHHHHHHHHHHHHHHHHHHHHHHHHHHHHHHHHCCCCCCCC   |
| 402    | EEELRKFLLDQYNNEEEDMRYQQQGFQFQGHSA  | -48.25         | 45.2       | HHHHHHHHHHHHHHHHHHHHHHHHHHHHHHHHHCCCCCCCC   |
| 143    | EEELRKKILEKLNNEEEDMRYQQYGFQFQGHQS  | -48.25         | 45.2       | HHHHHHHHHHHHHHHHHHHHHHHHHHHHHHHHHCCCCCCCC   |
| 317    | EEELRKKILEKLNNEEEDMRYQREGFGFQGHSS  | -48.25         | 45.2       | HHHHHHHHHHHHHHHHHHHHHHHHHHHHHHHHHCCCCCCCC   |
| 125    | EEELKFKFLDQLNNEEEDMRYQRYGFQFQGHSS  | -48.19         | 51.6       | HHHHHHHHHHHHHHHHHHHHHHHHHHHHHHHHHCCCCCCCC   |
| 080    | EEELKFKFLDQYNNEAEDMRYQQQGFQFQGHQS  | -48.19         | 54.8       | HHHHHHHHHHHHHHHHHHHHHHHHHHHHHHHHHCCCCCCCC   |
| 319    | EEELKFKFLDQYNNEAEDMRYQQQGFQFQGHSA  | -48.19         | 54.8       | HHHHHHHHHHHHHHHHHHHHHHHHHHHHHHHHHCCCCCCCC   |
| 563    | EEELRKFLLDQFNNEEKEDMRYQQQGFQFQGHSS | -48.19         | 51.6       | HHHHHHHHHHHHHHHHHHHHHHHHHHHHHHHHHCCCCCCCC   |
| 848    | EEELRKFLLDQLNNEEEDMRYQQQGFQFQGHQS  | -48.19         | 48.4       | HHHHHHHHHHHHHHHHHHHHHHHHHHHHHHHHHCCCCCCCC   |
| 646    | EEELRKFLLDQYNNEAEDMRYQRQGFQFQGHSA  | -48.19         | 51.6       | HHHHHHHHHHHHHHHHHHHHHHHHHHHHHHHHHCCCCCCCC   |
| 998    | EEELRKFLLDQYNNEEEDMRYQREGFGFQGHSA  | -48.19         | 48.4       | HHHHHHHHHHHHHHHHHHHHHHHHHHHHHHHHHCCCCCCCC   |
| 095    | EEELRKFLLDQYNNEEEDMRYQREGFGFQGHSS  | -48.19         | 48.4       | HHHHHHHHHHHHHHHHHHHHHHHHHHHHHHHHHCCCCCCCC   |
| 571    | EEELRKFLLDQYNNEEEDMRYQRNNGRQGHSS   | -48.19         | 48.4       | HHHHHHHHHHHHHHHHHHHHHHHHHHHHHHHHHCCCCCCCC   |
| 781    | EEELRKKILEKLNNEEEDMRYQQYGFQFQGHSS  | -48.17         | 45.2       | HHHHHHHHHHHHHHHHHHHHHHHHHHHHHHHHHCCCCCCCC   |
| 610    | EEELRKKILEKLNNEEKEDMRYQKGFQFQGHSA  | -48.17         | 45.2       | HHHHHHHHHHHHHHHHHHHHHHHHHHHHHHHHHCCCCCCCC   |
| 073    | EEELRKKILEKLNQYEDMRYQQQGFQFQGHSS   | -48.06         | 48.4       | HHHHHHHHHHHHHHHHHHHHHHHHHHHHHHHHHCCCCCCCC   |
| 830    | EEELRKKILEKLNQEAEDMRYQQQGFQFQGHQS  | -48.06         | 45.2       | HHHHHHHHHHHHHHHHHHHHHHHHHHHHHHHHHCCCCCCCC   |
| 804    | EEELKLLLEKLNQEAEDMRYQQQGFQFQGHSS   | -48.05         | 51.6       | HHHHHHHHHHHHHHHHHHHHHHHHHHHHHHHHHCCCCCCCC   |
| 444    | EEELKLLLEKLNQEAEDMRYQREGFGFQGHSS   | -48.05         | 51.6       | HHHHHHHHHHHHHHHHHHHHHHHHHHHHHHHHHCCCCCCCC   |
| 428    | EEELKLLLEKLNQEEEDMRYQRQGFQFQGHSA   | -48.05         | 48.4       | HHHHHHHHHHHHHHHHHHHHHHHHHHHHHHHHHCCCCCCCC   |
| 495    | EEELRKKLLEKLNQEAEDIRYQQQGFQFQGHSS  | -48.05         | 48.4       | HHHHHHHHHHHHHHHHHHHHHHHHHHHHHHHHHCCCCCCCC   |
| 064    | EEELRKKLLEKLNQEEEDIRYQQQGFQFQGHSS  | -48.05         | 45.2       | HHHHHHHHHHHHHHHHHHHHHHHHHHHHHHHHHCCCCCCCC   |
| 301    | EEELRKKLLEKLNQEEEDMRYQREGFGFQGHSS  | -48.05         | 45.2       | HHHHHHHHHHHHHHHHHHHHHHHHHHHHHHHHHCCCCCCCC   |
| 329    | EEELRKKLLEKLNQEKEDIRYQQQGFQFQGHQS  | -48.05         | 45.2       | HHHHHHHHHHHHHHHHHHHHHHHHHHHHHHHHHCCCCCCCC   |
| 101    | EEELKLLLEKLNNEAEDMRFQQQGFQFQGHSS   | -48.03         | 51.6       | HHHHHHHHHHHHHHHHHHHHHHHHHHHHHHHHHCCCCCCCC   |
| 390    | EEELRKKLLEKLNNEAEDMRFQQQGFQFQGHSS  | -48.03         | 48.4       | HHHHHHHHHHHHHHHHHHHHHHHHHHHHHHHHHCCCCCCCC   |
| 548    | EEELRKKLLEKLNNEEEDMRFQREGFGFQGHSS  | -48.03         | 45.2       | HHHHHHHHHHHHHHHHHHHHHHHHHHHHHHHHHCCCCCCCC   |
| 628    | EEELKLLDQINNEEEDMRYQQQGFQFQGHSDR   | -48.01         | 54.8       | HHHHHHHHHHHHHHHHHHHHHHHHHHHHHHHHHCCCCCCCC   |
| 723    | EEELRKKLLDQLNNEEKEDMRYQKGFQFQGHSDR | -48.01         | 51.6       | HHHHHHHHHHHHHHHHHHHHHHHHHHHHHHHHHCCCCCCCC   |
| 735    | EEELRKKLLDQINQEEEDMRYQQQGFQFQGHSDR | -47.81         | 51.6       | HHHHHHHHHHHHHHHHHHHHHHHHHHHHHHHHHCCCCCCCC   |
| 123    | EEELRKKMLDQINNEEEDMRYQREGFGFQGHSS  | -47.79         | 45.2       | HHHHHHHHHHHHHHHHHHHHHHHHHHHHHHHHHCCCCCCCC   |
| 869    | EEELRKKILEKLNNEEEDMRYQQYGFQFQGHSS  | -47.78         | 41.9       | HHHHHHHHHHHHHHHHHHHHHHHHHHHHHHHHHCCCCCCCC   |
| 619    | EEELRKKILEKLNNEEEDMRYQRQGFQFQGHQS  | -47.78         | 41.9       | HHHHHHHHHHHHHHHHHHHHHHHHHHHHHHHHHCCCCCCCC   |
| 286    | EEELKKKILEKLNNEAEDMRYQRQGFQFQGHSA  | -47.77         | 48.4       | HHHHHHHHHHHHHHHHHHHHHHHHHHHHHHHHHCCCCCCCC   |
| 575    | EEELKKKILEKLNNEEEDMRYQQQGFQFQGHQS  | -47.77         | 45.2       | HHHHHHHHHHHHHHHHHHHHHHHHHHHHHHHHHCCCCCCCC   |







|     |                                  |        |      |                                        |
|-----|----------------------------------|--------|------|----------------------------------------|
| 808 | EQELRKFLEKFNNEYEDMFYQQKGFKGHQS   | -47.19 | 51.6 | HHHHHHHHHHHHHHHHHHHHHHHHHHHHHHHHHCCCCC |
| 508 | EQELRKFLEKFNNEYEDMFYQQKGFKGHSA   | -47.19 | 51.6 | HHHHHHHHHHHHHHHHHHHHHHHHHHHHHHHHHCCCCC |
| 657 | EQELRKFLEKFNNEYEDMFYQQKGFKGHSS   | -47.19 | 51.6 | HHHHHHHHHHHHHHHHHHHHHHHHHHHHHHHHHCCCCC |
| 162 | EEELKKILEKLNNEKEHMRKQRQGGFGKQKS  | -47.17 | 38.7 | HHHHHHHHHHHHHHHHHHHHHHHHHHHHHHHHHCCCCC |
| 725 | EEELRKLLEKINNEEDIRYQQQGGFGKGHS   | -47.16 | 45.2 | HHHHHHHHHHHHHHHHHHHHHHHHHHHHHHHHHCCCCC |
| 660 | EEELKKILEQLNNEEDERYQRQGGFGKGDSR  | -47.10 | 48.4 | HHHHHHHHHHHHHHHHHHHHHHHHHHHHHHHHHCCCCC |
| 775 | EEELRKLLEQINNEEDRRYQYGFKGKQHQP   | -47.09 | 41.9 | HHHHHHHHHHHHHHHHHHHHHHHHHHHHHHHHHCCCCC |
| 947 | EEEKRKMLEKINQEAEDIRYQQQGGFGKGQA  | -47.09 | 48.4 | HHHHHHHHHHHHHHHHHHHHHHHHHHHHHHHHHCCCCC |
| 765 | EEEKRKMLEKINQEEEDMRYQQQGGFGKGHSA | -47.09 | 45.2 | HHHHHHHHHHHHHHHHHHHHHHHHHHHHHHHHHCCCCC |
| 901 | EEELKKFLEKFNNEYENMFKQQKGFSGGKSA  | -47.07 | 48.4 | HHHHHHHHHHHHHHHHHHHHHHHHHHHHHHHHHCCCCC |
| 481 | EEELRKLLEQLNQEADMRYQQQGGFGKGHS   | -47.06 | 41.9 | HHHHHHHHHHHHHHHHHHHHHHHHHHHHHHHHHCCCCC |
| 015 | EEELKKLLEQINQEAEDMRYQQQGGFGKGHS  | -47.04 | 48.4 | HHHHHHHHHHHHHHHHHHHHHHHHHHHHHHHHHCCCCC |
| 642 | EEELRKILEQINNEEDMRYQQQGGFGKGDSR  | -47.03 | 48.4 | HHHHHHHHHHHHHHHHHHHHHHHHHHHHHHHHHCCCCC |
| 214 | EEELRKILEQLNNEQEDMRYQQQGGFGKGDSR | -47.03 | 48.4 | HHHHHHHHHHHHHHHHHHHHHHHHHHHHHHHHHCCCCC |
| 608 | EEELKKLLEKINNEAEDMRYQRQGGFGKGDSR | -47.02 | 58.1 | HHHHHHHHHHHHHHHHHHHHHHHHHHHHHHHHHCCCCC |
| 368 | EEELRKLLEKLNNEEDMKYQRYGFGKGDSR   | -47.02 | 51.6 | HHHHHHHHHHHHHHHHHHHHHHHHHHHHHHHHHCCCCC |
| 578 | EEELKKLLEQINNEEDMRYQRQGGFGKGHSA  | -47.00 | 45.2 | HHHHHHHHHHHHHHHHHHHHHHHHHHHHHHHHHCCCCC |
| 962 | EEELRKLLEQINNEAEDMRYQREGMGKQHQP  | -47.00 | 45.2 | HHHHHHHHHHHHHHHHHHHHHHHHHHHHHHHHHCCCCC |
| 454 | EEELRKLLEQINNEEDMRYQQQGGFGKGHSA  | -47.00 | 41.9 | HHHHHHHHHHHHHHHHHHHHHHHHHHHHHHHHHCCCCC |
| 903 | EEELRKLLEQINNEEDMRYQQQGGFGKGHSS  | -47.00 | 41.9 | HHHHHHHHHHHHHHHHHHHHHHHHHHHHHHHHHCCCCC |
| 640 | EEELRKLLEQINNEEDMRYQRYGFGKGHQS   | -47.00 | 41.9 | HHHHHHHHHHHHHHHHHHHHHHHHHHHHHHHHHCCCCC |
| 183 | EEELRKLLEQINNEQEDMSYQQQGGFGKGHS  | -47.00 | 41.9 | HHHHHHHHHHHHHHHHHHHHHHHHHHHHHHHHHCCCCC |
| 252 | EEELRKLLEQLNNEQEDMRYQREGFGKGHSA  | -47.00 | 41.9 | HHHHHHHHHHHHHHHHHHHHHHHHHHHHHHHHHCCCCC |
| 954 | EEEKRKLEQINNEEDERYQREGFGKGHSS    | -46.99 | 41.9 | HHHHHHHHHHHHHHHHHHHHHHHHHHHHHHHHHCCCCC |
| 242 | EEELKKLLEQINNEAEDMRYQQQGGFGKGHS  | -46.99 | 48.4 | HHHHHHHHHHHHHHHHHHHHHHHHHHHHHHHHHCCCCC |
| 733 | EEELKKLLEQINNEAEDMYQRAGFGKGHSS   | -46.99 | 48.4 | HHHHHHHHHHHHHHHHHHHHHHHHHHHHHHHHHCCCCC |
| 203 | EEELKKLLEQINNEAEDMRYQKEGFGKGHSS  | -46.99 | 48.4 | HHHHHHHHHHHHHHHHHHHHHHHHHHHHHHHHHCCCCC |
| 122 | EEELKKLLEQINNEAEDMRYQQQGGFGKGHS  | -46.99 | 48.4 | HHHHHHHHHHHHHHHHHHHHHHHHHHHHHHHHHCCCCC |
| 671 | EEELKKLLEQINNEAEDMRYQQQGGFGKGHSA | -46.99 | 48.4 | HHHHHHHHHHHHHHHHHHHHHHHHHHHHHHHHHCCCCC |
| 806 | EEELKKLLEQINNEAEDMRYQREGFGKGHSS  | -46.99 | 48.4 | HHHHHHHHHHHHHHHHHHHHHHHHHHHHHHHHHCCCCC |
| 537 | EEELKKLLEQINNEAEDMRYQRYGFGKGHSS  | -46.99 | 48.4 | HHHHHHHHHHHHHHHHHHHHHHHHHHHHHHHHHCCCCC |
| 737 | EEELKKLLEQINNEEDIRYQQQGGFGKGHS   | -46.99 | 45.2 | HHHHHHHHHHHHHHHHHHHHHHHHHHHHHHHHHCCCCC |
| 100 | EEELKKLLEQINNEEDMRYQQQGGFGKGHQA  | -46.99 | 45.2 | HHHHHHHHHHHHHHHHHHHHHHHHHHHHHHHHHCCCCC |
| 163 | EEELKKLLEQINNEEDMRYQQQGGFGKGHSA  | -46.99 | 45.2 | HHHHHHHHHHHHHHHHHHHHHHHHHHHHHHHHHCCCCC |
| 031 | EEELKKLLEQINNEEDMRYQQYGFKGHSA    | -46.99 | 45.2 | HHHHHHHHHHHHHHHHHHHHHHHHHHHHHHHHHCCCCC |
| 700 | EEELKKLLEQINNEEDMRYQREGFGKGHSA   | -46.99 | 45.2 | HHHHHHHHHHHHHHHHHHHHHHHHHHHHHHHHHCCCCC |
| 493 | EEELKKLLEQINNEEDMRYQREGFGKGHSS   | -46.99 | 45.2 | HHHHHHHHHHHHHHHHHHHHHHHHHHHHHHHHHCCCCC |
| 593 | EEELKKLLEQLNNEKEDERYQQQGGFGKGHSS | -46.99 | 45.2 | HHHHHHHHHHHHHHHHHHHHHHHHHHHHHHHHHCCCCC |
| 625 | EEELKKLLEQLNNEKEDMRYQQQGGFGKGHS  | -46.99 | 45.2 | HHHHHHHHHHHHHHHHHHHHHHHHHHHHHHHHHCCCCC |
| 826 | EEELKKLLEQLNNEKEDMRYQRQGGFGKGHSS | -46.99 | 45.2 | HHHHHHHHHHHHHHHHHHHHHHHHHHHHHHHHHCCCCC |
| 736 | EEELKKLLEQLNNEQEDMRYQRYGFGKGHSS  | -46.99 | 45.2 | HHHHHHHHHHHHHHHHHHHHHHHHHHHHHHHHHCCCCC |
| 916 | EEELRKLLEQINNEAEDIRYQQQGGFGKGHSS | -46.99 | 45.2 | HHHHHHHHHHHHHHHHHHHHHHHHHHHHHHHHHCCCCC |
| 653 | EEELRKLLEQINNEAEDMRYQQQGGFGKGHQS | -46.99 | 45.2 | HHHHHHHHHHHHHHHHHHHHHHHHHHHHHHHHHCCCCC |
| 195 | EEELRKLLEQINNEAEDMRYQQQGGFGKGHSA | -46.99 | 45.2 | HHHHHHHHHHHHHHHHHHHHHHHHHHHHHHHHHCCCCC |
| 117 | EEELRKLLEQINNEAEDMRYQQQGGFGKGHSS | -46.99 | 45.2 | HHHHHHHHHHHHHHHHHHHHHHHHHHHHHHHHHCCCCC |
| 996 | EEELRKLLEQINNEAEDMRYQQYGFKGHSS   | -46.99 | 45.2 | HHHHHHHHHHHHHHHHHHHHHHHHHHHHHHHHHCCCCC |
| 620 | EEELRKLLEQINNEAEDMRYQRQGGFGKGHSS | -46.99 | 45.2 | HHHHHHHHHHHHHHHHHHHHHHHHHHHHHHHHHCCCCC |
| 345 | EEELRKLLEQINNEAEDMRYQRYGFGKGHSA  | -46.99 | 45.2 | HHHHHHHHHHHHHHHHHHHHHHHHHHHHHHHHHCCCCC |
| 485 | EEELRKLLEQINNEAEDMRYQRYGFGKGHSS  | -46.99 | 45.2 | HHHHHHHHHHHHHHHHHHHHHHHHHHHHHHHHHCCCCC |
| 538 | EEELRKLLEQINNEAEDMSYQKEGFGKGHSS  | -46.99 | 45.2 | HHHHHHHHHHHHHHHHHHHHHHHHHHHHHHHHHCCCCC |
| 427 | EEELRKLLEQINNEEDERYQQQGGFGKGHSA  | -46.99 | 41.9 | HHHHHHHHHHHHHHHHHHHHHHHHHHHHHHHHHCCCCC |
| 890 | EEELRKLLEQINNEEDMRYQRNGFGKGHSA   | -46.99 | 41.9 | HHHHHHHHHHHHHHHHHHHHHHHHHHHHHHHHHCCCCC |
| 491 | EEELRKLLEQINNEEDMRYQKEGFGKGHSA   | -46.99 | 41.9 | HHHHHHHHHHHHHHHHHHHHHHHHHHHHHHHHHCCCCC |
| 961 | EEELRKLLEQINNEEDMRYQKEGFGKGHSS   | -46.99 | 41.9 | HHHHHHHHHHHHHHHHHHHHHHHHHHHHHHHHHCCCCC |
| 218 | EEELRKLLEQINNEEDMRYQQYGFKGHSA    | -46.99 | 41.9 | HHHHHHHHHHHHHHHHHHHHHHHHHHHHHHHHHCCCCC |
| 834 | EEELRKLLEQINNEEDMRYQQYGFKGHSS    | -46.99 | 41.9 | HHHHHHHHHHHHHHHHHHHHHHHHHHHHHHHHHCCCCC |
| 398 | EEELRKLLEQINNEEDMRYQREGFGKGHQS   | -46.99 | 41.9 | HHHHHHHHHHHHHHHHHHHHHHHHHHHHHHHHHCCCCC |
| 007 | EEELRKLLEQINNEEDMRYQREGFGKGHSA   | -46.99 | 41.9 | HHHHHHHHHHHHHHHHHHHHHHHHHHHHHHHHHCCCCC |
| 529 | EEELRKLLEQINNEEDMRYQRQGGFGKGHS   | -46.99 | 41.9 | HHHHHHHHHHHHHHHHHHHHHHHHHHHHHHHHHCCCCC |
| 439 | EEELRKLLEQINNEEDMRYQRQGGFGKGHSA  | -46.99 | 41.9 | HHHHHHHHHHHHHHHHHHHHHHHHHHHHHHHHHCCCCC |
| 881 | EEELRKLLEQINNEEDQRYQQQGGFGKGHSS  | -46.99 | 41.9 | HHHHHHHHHHHHHHHHHHHHHHHHHHHHHHHHHCCCCC |
| 757 | EEELRKLLEQINNEKEDDEYQRRGMGKQHQP  | -46.99 | 41.9 | HHHHHHHHHHHHHHHHHHHHHHHHHHHHHHHHHCCCCC |
| 761 | EEELRKLLEQINNEKEDMEYQKEGFGKGHQS  | -46.99 | 41.9 | HHHHHHHHHHHHHHHHHHHHHHHHHHHHHHHHHCCCCC |
| 649 | EEELRKLLEQINNEKEDMRYQQQGGFGKGHSA | -46.99 | 41.9 | HHHHHHHHHHHHHHHHHHHHHHHHHHHHHHHHHCCCCC |
| 982 | EEELRKLLEQINNEQEDMYQQKGFKGHQS    | -46.99 | 41.9 | HHHHHHHHHHHHHHHHHHHHHHHHHHHHHHHHHCCCCC |
| 699 | EEELRKLLEQINNEQEDMYQQKGFKGHSA    | -46.99 | 41.9 | HHHHHHHHHHHHHHHHHHHHHHHHHHHHHHHHHCCCCC |
| 034 | EEELRKLLEQLNNEEDMKYQQQGGFGKGHSA  | -46.99 | 41.9 | HHHHHHHHHHHHHHHHHHHHHHHHHHHHHHHHHCCCCC |

|     |                                 |        |      |                                |
|-----|---------------------------------|--------|------|--------------------------------|
| 057 | EEELRKLLEQLNNEEEDMKYQQQGFQGHSS  | -46.99 | 41.9 | HHHHHHHHHHHHHHHHHHHHHHHHHHHHCC |
| 743 | EEELRKLLEQLNNEKEDERYQQQGFQGHSA  | -46.99 | 41.9 | HHHHHHHHHHHHHHHHHHHHHHHHHHHHCC |
| 568 | EEELRKLLEQLNNEKEDERYQQQGFQGHSS  | -46.99 | 41.9 | HHHHHHHHHHHHHHHHHHHHHHHHHHHHCC |
| 645 | EEELRKLLEQLNNEKEDIRYQQQGFQGHSS  | -46.99 | 41.9 | HHHHHHHHHHHHHHHHHHHHHHHHHHHHCC |
| 151 | EEELRKLLEQLNNEKEDMRYQQQGFQGHSS  | -46.99 | 41.9 | HHHHHHHHHHHHHHHHHHHHHHHHHHHHCC |
| 833 | EEELRKLLEQLNNEKEDMRYQYGFQGHQS   | -46.99 | 41.9 | HHHHHHHHHHHHHHHHHHHHHHHHHHHHCC |
| 707 | EEELRKLLEQLNNEKEDMRYQRQGFQGHQS  | -46.99 | 41.9 | HHHHHHHHHHHHHHHHHHHHHHHHHHHHCC |
| 223 | EEELRKLLEQLNNEKEDMRYQRQGFQGHSA  | -46.99 | 41.9 | HHHHHHHHHHHHHHHHHHHHHHHHHHHHCC |
| 975 | EEELRKLLEQLNNEKEDMRYQRYGFQGHSA  | -46.99 | 41.9 | HHHHHHHHHHHHHHHHHHHHHHHHHHHHCC |
| 580 | EEELRKLLEQLNNEQEDMRYQKEGFQGHSA  | -46.99 | 41.9 | HHHHHHHHHHHHHHHHHHHHHHHHHHHHCC |
| 462 | EEELRKLLEQLNNEQEDMRYQQQGFQGHDP  | -46.99 | 41.9 | HHHHHHHHHHHHHHHHHHHHHHHHHHHHCC |
| 265 | EEEWKKLMEQYNNNEEDMRYQQQGFQGHSS  | -46.99 | 41.9 | HHHHHHHHHHHHHHHHHHHHHHHHHHHHCC |
| 592 | EEEWRKLMQYNNNEEDMYQQQGFQGHSS    | -46.99 | 38.7 | HHHHHHHHHHHHHHHHHHHHHHHHHHHHCC |
| 760 | EQELRKLLEQINNEKEDMEYQKGFQGHQS   | -46.99 | 38.7 | HHHHHHHHHHHHHHHHHHHHHHHHHHHHCC |
| 980 | EEEARKMLEKINNEEDIRYQQQGFQGHQS   | -46.98 | 48.4 | HHHHHHHHHHHHHHHHHHHHHHHHHHHHCC |
| 239 | EEELRKFLKLNNEEEDMRYQQQGFQGHSA   | -46.92 | 48.4 | HHHHHHHHHHHHHHHHHHHHHHHHHHHHCC |
| 415 | EEELRKFLKYNNNEEDMRYQQQGFQGHSS   | -46.92 | 48.4 | HHHHHHHHHHHHHHHHHHHHHHHHHHHHCC |
| 740 | EEELRKLILQLNNEQEDMRYQQQGFQGDJR  | -46.89 | 51.6 | HHHHHHHHHHHHHHHHHHHHHHHHHHHHCC |
| 747 | EEELRKILEQLNNEEDMRYQQQGFQGDJR   | -46.87 | 48.4 | HHHHHHHHHHHHHHHHHHHHHHHHHHHHCC |
| 020 | EEELKLLLEQINQEAEDRRYQRYGFQGHQS  | -46.87 | 48.4 | HHHHHHHHHHHHHHHHHHHHHHHHHHHHCC |
| 715 | EEELKFLKFNNEEDMYQQQGFQGHSS      | -46.86 | 54.8 | HHHHHHHHHHHHHHHHHHHHHHHHHHHHCC |
| 236 | EEELRKFLKYNNNEEDMRYQKEGFQGHQS   | -46.86 | 51.6 | HHHHHHHHHHHHHHHHHHHHHHHHHHHHCC |
| 490 | EEELRKFLKYNNNEEDMYQYGFQGHQS     | -46.86 | 48.4 | HHHHHHHHHHHHHHHHHHHHHHHHHHHHCC |
| 750 | EEELKLLDKLNNEKEQMSYQQQGFQGHSA   | -46.80 | 45.2 | HHHHHHHHHHHHHHHHHHHHHHHHHHHHCC |
| 326 | EEELKLLLEKLNQEQEDMRYQQQGFQGDJR  | -46.80 | 54.8 | HHHHHHHHHHHHHHHHHHHHHHHHHHHHCC |
| 777 | EEELRKLLEKINQEAEDISYQQQGFQGDJR  | -46.80 | 54.8 | HHHHHHHHHHHHHHHHHHHHHHHHHHHHCC |
| 627 | EEELRKLLEKINQEEEDMRYQREGFQGDJR  | -46.80 | 51.6 | HHHHHHHHHHHHHHHHHHHHHHHHHHHHCC |
| 536 | EEELRKLLEKINQEYEDIFYQQKGFQGDJR  | -46.80 | 54.8 | HHHHHHHHHHHHHHHHHHHHHHHHHHHHCC |
| 068 | EEEEKMLLEKINNEEDIRYQQQGFQGHSA   | -46.79 | 48.4 | HHHHHHHHHHHHHHHHHHHHHHHHHHHHCC |
| 865 | EEEEKMLLEKINNEKEDMEYQRAGFQGHSA  | -46.79 | 48.4 | HHHHHHHHHHHHHHHHHHHHHHHHHHHHCC |
| 727 | EEEEKMLLEKINNEEDMRYQYGFQGHSS    | -46.79 | 45.2 | HHHHHHHHHHHHHHHHHHHHHHHHHHHHCC |
| 965 | EEEEKMLLEKINNEEDMRYQRQGFQGHQS   | -46.79 | 45.2 | HHHHHHHHHHHHHHHHHHHHHHHHHHHHCC |
| 527 | EEQLKKFLKFNNEEDMFYQQQGFQGHSA    | -46.75 | 61.3 | HHHHHHHHHHHHHHHHHHHHHHHHHHHHCC |
| 991 | EEELRKFLQFNNEEDMFQKGFQGSJKSR    | -46.74 | 48.4 | HHHHHHHHHHHHHHHHHHHHHHHHHHHHCC |
| 989 | EESLKKILEQLNNEKEDMRYQQQGFQGHSS  | -46.73 | 45.2 | HHHHHHHHHHHHHHHHHHHHHHHHHHHHCC |
| 762 | EEELKFLLEQYNQEAEDMRYQRYGFQGHSA  | -46.73 | 51.6 | HHHHHHHHHHHHHHHHHHHHHHHHHHHHCC |
| 393 | EEELKFLLEQFNQEYEDMFYQKEGFQGHSA  | -46.72 | 54.8 | HHHHHHHHHHHHHHHHHHHHHHHHHHHHCC |
| 378 | EEELKFLLEQFNQEYEDMFYQQKGFQGHSS  | -46.72 | 54.8 | HHHHHHHHHHHHHHHHHHHHHHHHHHHHCC |
| 530 | EEELKFLLEQFNQEYEDMYQQQGFQGHSS   | -46.72 | 51.6 | HHHHHHHHHHHHHHHHHHHHHHHHHHHHCC |
| 071 | EEELKFLLEQKNQEEEDIRYQQQGFQGHQS  | -46.72 | 48.4 | HHHHHHHHHHHHHHHHHHHHHHHHHHHHCC |
| 061 | EEELKFLLEQYNQEAEDIYYQQNGFQGHQS  | -46.72 | 51.6 | HHHHHHHHHHHHHHHHHHHHHHHHHHHHCC |
| 371 | EEELKFLLEQYNQEAEDMRYQRQGFQGHSA  | -46.72 | 51.6 | HHHHHHHHHHHHHHHHHHHHHHHHHHHHCC |
| 388 | EEELKFLLEQYNQEYEDDEEQRTGRQGHSA  | -46.72 | 48.4 | HHHHHHHHHHHHHHHHHHHHHHHHHHHHCC |
| 324 | EEELRKFLEQFNQEKEDMRYQQQGFQGHSS  | -46.72 | 48.4 | HHHHHHHHHHHHHHHHHHHHHHHHHHHHCC |
| 330 | EEELRKFLEQFNQEYEDDEEQYQKGFQGHSA | -46.72 | 48.4 | HHHHHHHHHHHHHHHHHHHHHHHHHHHHCC |
| 752 | EEELRKFLEQFNQEYEDDEEQYQYQYQYQY  | -46.72 | 48.4 | HHHHHHHHHHHHHHHHHHHHHHHHHHHHCC |
| 062 | EEELRKFLEQFNQEYEDMYQQKGFQGHQS   | -46.72 | 48.4 | HHHHHHHHHHHHHHHHHHHHHHHHHHHHCC |
| 081 | EEELRKFLEQYNQEEEDMEYQRNQRGKHSY  | -46.72 | 45.2 | HHHHHHHHHHHHHHHHHHHHHHHHHHHHCC |
| 311 | EEELRKFLQYNQEEEDMRYQREGFQGHSA   | -46.72 | 45.2 | HHHHHHHHHHHHHHHHHHHHHHHHHHHHCC |
| 136 | EEELRKFLQYNQEEEDMRYQRYGFQGHQS   | -46.72 | 45.2 | HHHHHHHHHHHHHHHHHHHHHHHHHHHHCC |
| 134 | EEELRKFLQYNQEYEDMEYQRTGRQGHSA   | -46.72 | 45.2 | HHHHHHHHHHHHHHHHHHHHHHHHHHHHCC |
| 503 | EEELRKFLQYNQEYEDMRYQYQYQYQYQY   | -46.72 | 45.2 | HHHHHHHHHHHHHHHHHHHHHHHHHHHHCC |
| 115 | EEELRKFLQYNQEYEDMRYQYQYQYQYQY   | -46.72 | 45.2 | HHHHHHHHHHHHHHHHHHHHHHHHHHHHCC |
| 767 | EEEQRKFEEQRNQEEEDMRYQQQGFQGHSA  | -46.72 | 41.9 | HHHHHHHHHHHHHHHHHHHHHHHHHHHHCC |
| 555 | EQELRKFLQFNQEKEDMRYQQQGFQGHQS   | -46.72 | 45.2 | HHHHHHHHHHHHHHHHHHHHHHHHHHHHCC |
| 051 | EQELRKFLQMNQEKEDMEYQRNQRGKHSY   | -46.72 | 41.9 | HHHHHHHHHHHHHHHHHHHHHHHHHHHHCC |
| 224 | EEELRKLLEQIEQEREDMEYQQKGFQGDJR  | -46.71 | 45.2 | HHHHHHHHHHHHHHHHHHHHHHHHHHHHCC |
| 749 | EEELRKFLEKYNNNEEDMRYQQQGFQGHSS  | -46.67 | 51.6 | HHHHHHHHHHHHHHHHHHHHHHHHHHHHCC |
| 940 | EEELRKFLQYNNEEDMSFQKEGFQGHSA    | -46.66 | 41.9 | HHHHHHHHHHHHHHHHHHHHHHHHHHHHCC |
| 663 | EEELRKLLEKINQEAEDRRYQRQGFQGHQS  | -46.65 | 48.4 | HHHHHHHHHHHHHHHHHHHHHHHHHHHHCC |
| 256 | EEELRKLLEQINNEEEDMRYQYGFQGHSA   | -46.63 | 35.5 | HHHHHHHHHHHHHHHHHHHHHHHHHHHHCC |
| 251 | EEEEKFLKFNNEEDIFYQQKGFQGHSA     | -46.59 | 54.8 | HHHHHHHHHHHHHHHHHHHHHHHHHHHHCC |
| 886 | EEEEKFLQYNQEEEDMRYQRAGFQGHSS    | -46.58 | 45.2 | HHHHHHHHHHHHHHHHHHHHHHHHHHHHCC |
| 037 | EEEEKMLLEQINNEEDMRQRYGFQGSJKSR  | -46.56 | 45.2 | HHHHHHHHHHHHHHHHHHHHHHHHHHHHCC |
| 029 | EEELRKFLQYNNNEEDIRYQQQGFQGHSA   | -46.55 | 51.6 | HHHHHHHHHHHHHHHHHHHHHHHHHHHHCC |
| 305 | EEEEKMLLDQINNEEDMRYQRQGFQGDJR   | -46.55 | 58.1 | HHHHHHHHHHHHHHHHHHHHHHHHHHHHCC |
| 845 | EEELRKLLEQINQEEEDMRYQYGFQGDJR   | -46.54 | 48.4 | HHHHHHHHHHHHHHHHHHHHHHHHHHHHCC |

|     |                                  |        |      |                                     |
|-----|----------------------------------|--------|------|-------------------------------------|
| 017 | EEELRKFLEQYNNEEEDRRYQREGFGKGHSS  | -46.53 | 45.2 | HHHHHHHHHHHHCHHHHHHHHHHHHHCCCCCCC   |
| 569 | EEELRKILEQLNNEQEDMRYQREGFGKGDSS  | -46.52 | 48.4 | HHHHHHHHHHHHHHHHHHHHHHHHHHHHCCCCCCC |
| 312 | EEELKKLLEKINENEREDREYQREGFGKGHSA | -46.52 | 45.2 | HHHHHHHHHHHHHHHHHHHHHHHHHHHHCCCCCCC |
| 866 | EEELKKLLEKINNEAEDMRYQQQGFQKGDSS  | -46.51 | 58.1 | HHHHHHHHHHHHHHHHHHHHHHHHHHHHCCCCCCC |
| 515 | EEELKKLLEKINNEAEDMRYQRYGFGKGDSS  | -46.51 | 54.8 | HHHHHHHHHHHHHHHHHHHHHHHHHHHHCCCCCCC |
| 325 | EEELRKLEKINNEAEDERYQQQGFQKGDSS   | -46.51 | 54.8 | HHHHHHHHHHHHHHHHHHHHHHHHHHHHCCCCCCC |
| 121 | EEELRKLEKINNEAEDMRYQKEGFGKGDSS   | -46.51 | 54.8 | HHHHHHHHHHHHHHHHHHHHHHHHHHHHCCCCCCC |
| 550 | EEELRKLEKINNEAEDMRYQQQGFQKGDSS   | -46.51 | 54.8 | HHHHHHHHHHHHHHHHHHHHHHHHHHHHCCCCCCC |
| 855 | EQELRKLEKLNNEKEDIRYQQQGFQKGDSS   | -46.51 | 48.4 | HHHHHHHHHHHHHHHHHHHHHHHHHHHHCCCCCCC |
| 664 | EEELKKFLEKYNNEAEDIYYQQNGFGKGDSS  | -46.45 | 61.3 | HHHHHHHHHHHHHHHHHHHHHHHHHHHHCCCCCCC |
| 512 | EEELRKFLFKFNNEEDMFYQQKGFQKGDSS   | -46.45 | 61.3 | HHHHHHHHHHHHHHHHHHHHHHHHHHHHCCCCCCC |
| 413 | EEELRKFLFKYNNEEDMRYQRYGFGKGDSS   | -46.45 | 54.8 | HHHHHHHHHHHHHHHHHHHHHHHHHHHHCCCCCCC |
| 014 | EEELKKFLEQFNNEYEDMFYQQKGFQKGHSS  | -46.44 | 54.8 | HHHHHHHHHHHHHHHHHHHHHHHHHHHHCCCCCCC |
| 654 | EEELKKFLEQLNNEEEDMRYQQQGFQKGHQS  | -46.44 | 48.4 | HHHHHHHHHHHHHHHHHHHHHHHHHHHHCCCCCCC |
| 945 | EEELRKFLFKFNNEEDMFYQQKGFQKGHSA   | -46.44 | 51.6 | HHHHHHHHHHHHHHHHHHHHHHHHHHHHCCCCCCC |
| 874 | EEELRKFLFKFNNEEDMFYQQKGFQKGHSS   | -46.44 | 48.4 | HHHHHHHHHHHHHHHHHHHHHHHHHHHHCCCCCCC |
| 497 | EEELRKFLFKFNNEEDMFYQQQGFQKGHQS   | -46.44 | 48.4 | HHHHHHHHHHHHHHHHHHHHHHHHHHHHCCCCCCC |
| 889 | EEELRKFLFKFNNEEDMRYQQYGFQKGHSS   | -46.44 | 45.2 | HHHHHHHHHHHHHHHHHHHHHHHHHHHHCCCCCCC |
| 070 | EEELKKILEQLNNEEDMRYQQYGFQKGDSS   | -46.44 | 51.6 | HHHHHHHHHHHHHHHHHHHHHHHHHHHHCCCCCCC |
| 248 | EQELRKFLFKFNNEEEDRRYQQYGFQKGHSA  | -46.43 | 38.7 | HHHHHHHHHHHHHHHHHHHHHHHHHHHHCCCCCCC |
| 695 | EEELKKFLEQLNNEEEDMRYQQYGFQKGHSS  | -46.42 | 45.2 | HHHHHHHHHHHHHHHHHHHHHHHHHHHHCCCCCCC |
| 944 | EEELKKFLEQYNNEEEDMRYQREGFGKGHSS  | -46.42 | 45.2 | HHHHHHHHHHHHCHHHHHHHHHHHHHCCCCCCC   |
| 636 | EEELKKFLEQFNNEFEDMFYQQKGFQKGHSS  | -46.42 | 51.6 | HHHHHHHHHHHHHHHHHHHHHHHHHHHHCCCCCCC |
| 135 | EEELKKFLEQFNNEKEDMRYQQQGFQKGHSA  | -46.42 | 51.6 | HHHHHHHHHHHHHHHHHHHHHHHHHHHHCCCCCCC |
| 702 | EEELKKFLEQFNNEKEDMRYQQQGFQKGHSS  | -46.42 | 51.6 | HHHHHHHHHHHHHHHHHHHHHHHHHHHHCCCCCCC |
| 861 | EEELKKFLEQFNNEYEDFYQQKGFQKGHSA   | -46.42 | 54.8 | HHHHHHHHHHHHHHHHHHHHHHHHHHHHCCCCCCC |
| 800 | EEELKKFLEQFNNEYEDFYQQKGFQKGHSS   | -46.42 | 54.8 | HHHHHHHHHHHHHHHHHHHHHHHHHHHHCCCCCCC |
| 040 | EEELKKFLEQFNNEYEDMFYQKEGFGKGHSA  | -46.42 | 54.8 | HHHHHHHHHHHHHHHHHHHHHHHHHHHHCCCCCCC |
| 609 | EEELKKFLEQFNNEYEDMFYQKEGFGKGHSS  | -46.42 | 54.8 | HHHHHHHHHHHHHHHHHHHHHHHHHHHHCCCCCCC |
| 185 | EEELKKFLEQFNNEYEDMFYQQKGFQKGHQS  | -46.42 | 54.8 | HHHHHHHHHHHHHHHHHHHHHHHHHHHHCCCCCCC |
| 994 | EEELKKFLEQFNNEYEDMFYQQKGFQKGHSA  | -46.42 | 54.8 | HHHHHHHHHHHHHHHHHHHHHHHHHHHHCCCCCCC |
| 629 | EEELKKFLEQFNNEYEDMFYQQQGFQKGHSA  | -46.42 | 51.6 | HHHHHHHHHHHHHHHHHHHHHHHHHHHHCCCCCCC |
| 616 | EEELKKFLEQFNNEYEDMFYQQKGFQKGHSS  | -46.42 | 51.6 | HHHHHHHHHHHHHHHHHHHHHHHHHHHHCCCCCCC |
| 501 | EEELKKFLEQFNNEYEDMFYQQQGFQKGHSS  | -46.42 | 51.6 | HHHHHHHHHHHHHHHHHHHHHHHHHHHHCCCCCCC |
| 047 | EEELKKFLEQLNNEEEDMRYQQYGFQKGHSA  | -46.42 | 48.4 | HHHHHHHHHHHHHHHHHHHHHHHHHHHHCCCCCCC |
| 771 | EEELKKFLEQLNNEEEDMRYQQYGFQKGHSA  | -46.42 | 48.4 | HHHHHHHHHHHHHHHHHHHHHHHHHHHHCCCCCCC |
| 433 | EEELKKFLEQYNNEAEDIRYQQGFGKGHQS   | -46.42 | 51.6 | HHHHHHHHHHHHHHHHHHHHHHHHHHHHCCCCCCC |
| 896 | EEELKKFLEQYNNEAEDMRYQQQGFQKGHSA  | -46.42 | 51.6 | HHHHHHHHHHHHHHHHHHHHHHHHHHHHCCCCCCC |
| 131 | EEELKKFLEQYNNEAEDMRYQREGFGKGHSA  | -46.42 | 51.6 | HHHHHHHHHHHHHHHHHHHHHHHHHHHHCCCCCCC |
| 132 | EEELKKFLEQYNNEAEDMRYQREGFGKGHSS  | -46.42 | 51.6 | HHHHHHHHHHHHHHHHHHHHHHHHHHHHCCCCCCC |
| 587 | EEELKKFLEQYNNEAEDMRYQRYGFGKGHSA  | -46.42 | 51.6 | HHHHHHHHHHHHHHHHHHHHHHHHHHHHCCCCCCC |
| 701 | EEELKKFLEQYNNEAEDMRYQRYGFGKGHSS  | -46.42 | 51.6 | HHHHHHHHHHHHHHHHHHHHHHHHHHHHCCCCCCC |
| 355 | EEELKKFLEQYNNEAEDMFYQRYGFGKGHSS  | -46.42 | 51.6 | HHHHHHHHHHHHHHHHHHHHHHHHHHHHCCCCCCC |
| 177 | EEELKKFLEQYNNEEEDMEYQRNGFGKGHQS  | -46.42 | 48.4 | HHHHHHHHHHHHCHHHHHHHHHHHHHCCCCCCC   |
| 500 | EEELKKFLEQYNNEEEDMRYQREGFGKGHSA  | -46.42 | 48.4 | HHHHHHHHHHHHCHHHHHHHHHHHHHCCCCCCC   |
| 938 | EEELKKFLEQYNNEEEDERYQQQGFQKGHQS  | -46.42 | 48.4 | HHHHHHHHHHHHCHHHHHHHHHHHHHCCCCCCC   |
| 956 | EEELKKFLEQYNNEEEDERYQQQGFQKGHSA  | -46.42 | 48.4 | HHHHHHHHHHHHCHHHHHHHHHHHHHCCCCCCC   |
| 827 | EEELKKFLEQYNNEEEDMRYQKEGFGKGHSA  | -46.42 | 48.4 | HHHHHHHHHHHHHHHHHHHHHHHHHHHHCCCCCCC |
| 698 | EEELKKFLEQYNNEEEDMRYQQGFGKGHQS   | -46.42 | 48.4 | HHHHHHHHHHHHHHHHHHHHHHHHHHHHCCCCCCC |
| 386 | EEELKKFLEQYNNEEEDMRYQQQGFQKGHQS  | -46.42 | 48.4 | HHHHHHHHHHHHHHHHHHHHHHHHHHHHCCCCCCC |
| 172 | EEELKKFLEQYNNEEEDMRYQQQGFQKGHSA  | -46.42 | 48.4 | HHHHHHHHHHHHHHHHHHHHHHHHHHHHCCCCCCC |
| 025 | EEELKKFLEQYNNEEEDMRYQQQGFQKGHSS  | -46.42 | 48.4 | HHHHHHHHHHHHHHHHHHHHHHHHHHHHCCCCCCC |
| 675 | EEELKKFLEQYNNEEEDMRYQRYGFGKGHQS  | -46.42 | 48.4 | HHHHHHHHHHHHHHHHHHHHHHHHHHHHCCCCCCC |
| 016 | EEELKKFLEQYNNEEEDMRYQRYGFGKGHSA  | -46.42 | 48.4 | HHHHHHHHHHHHHHHHHHHHHHHHHHHHCCCCCCC |
| 576 | EEELKKFLEQYNNEYEDEEYQRKGFQKGHSA  | -46.42 | 48.4 | HHHHHHHHHHHHHHHHHHHHHHHHHHHHCCCCCCC |
| 674 | EEELKKFLEQYNNEYEDEEYQRKGFQKGHSS  | -46.42 | 48.4 | HHHHHHHHHHHHHHHHHHHHHHHHHHHHCCCCCCC |
| 748 | EEELRKFLFKFNNEEEDERYQQQGFQKGHSS  | -46.42 | 48.4 | HHHHHHHHHHHHCHHHHHHHHHHHHHCCCCCCC   |
| 783 | EEELRKFLFKFNNEYEDFYQQKGFQKGHSA   | -46.42 | 51.6 | HHHHHHHHHHHHHHHHHHHHHHHHHHHHCCCCCCC |
| 192 | EEELRKFLFKFNNEYEDMFYQQKGFQKGHQS  | -46.42 | 51.6 | HHHHHHHHHHHHHHHHHHHHHHHHHHHHCCCCCCC |
| 782 | EEELRKFLFKFNNEYEDMFYQQKGFQKGHQS  | -46.42 | 48.4 | HHHHHHHHHHHHHHHHHHHHHHHHHHHHCCCCCCC |
| 460 | EEELRKFLFKFNNEYEDMFYQQKGFQKGHSA  | -46.42 | 48.4 | HHHHHHHHHHHHHHHHHHHHHHHHHHHHCCCCCCC |
| 277 | EEELRKFLFKFNNEYEDMFYQQNGSGKGHSS  | -46.42 | 48.4 | HHHHHHHHHHHHHHHHHHHHHHHHHHHHCCCCCCC |
| 624 | EEELRKFLFKFNNEYEDMFYQQQGFQKGHSA  | -46.42 | 48.4 | HHHHHHHHHHHHHHHHHHHHHHHHHHHHCCCCCCC |
| 254 | EEELRKFLFKFNNEEEDMRYQQQGFQKGHQA  | -46.42 | 45.2 | HHHHHHHHHHHHHHHHHHHHHHHHHHHHCCCCCCC |
| 438 | EEELRKFLFKFNNEEEDMRYQQQGFQKGHSA  | -46.42 | 45.2 | HHHHHHHHHHHHHHHHHHHHHHHHHHHHCCCCCCC |
| 049 | EEELRKFLFKFNNEEEDMRYQQYGFQKGHSA  | -46.42 | 45.2 | HHHHHHHHHHHHHHHHHHHHHHHHHHHHCCCCCCC |
| 447 | EEELRKFLFKFNNEEEDMRYQQYGFQKGHSS  | -46.42 | 45.2 | HHHHHHHHHHHHHHHHHHHHHHHHHHHHCCCCCCC |

|     |                                 |        |      |                                        |
|-----|---------------------------------|--------|------|----------------------------------------|
| 091 | EEELRKFLEQYNNEAEDMRYQKEGFGKGHSA | -46.42 | 48.4 | HHHHHHHHHHHHHHHHHHHHHHHHHHHHHHHCCCCCCC |
| 175 | EEELRKFLEQYNNEAEDMRYQQQGFQKGHQS | -46.42 | 48.4 | HHHHHHHHHHHHHHHHHHHHHHHHHHHHHHHCCCCCCC |
| 138 | EEELRKFLEQYNNEAEDMRYQQQGFQKGHSS | -46.42 | 48.4 | HHHHHHHHHHHHHHHHHHHHHHHHHHHHHHHCCCCCCC |
| 966 | EEELRKFLEQYNNEAEDMRYQRQGFQKGHSS | -46.42 | 48.4 | HHHHHHHHHHHHHHHHHHHHHHHHHHHHHHHCCCCCCC |
| 494 | EEELRKFLEQYNNEEEDIRYQQQGFQKGHSA | -46.42 | 45.2 | HHHHHHHHHHHHHCHHHHHHHHHHHHCCCCCCC      |
| 107 | EEELRKFLEQYNNEEEDMQYQRSQMGKGHQP | -46.42 | 48.4 | HHHHHHHHHHHCHHHHHHHHHHHHCCCCCCC        |
| 264 | EEELRKFLEQYNNEEEDMRYQREGFGKGHSA | -46.42 | 45.2 | HHHHHHHHHHHCHHHHHHHHHHHHCCCCCCC        |
| 349 | EEELRKFLEQYNNEEEDMRYQREGFGKGHSS | -46.42 | 45.2 | HHHHHHHHHHHCHHHHHHHHHHHHCCCCCCC        |
| 272 | EEELRKFLEQYNNEEEDMRYQREGKGKGHSH | -46.42 | 45.2 | HHHHHHHHHHHCHHHHHHHHHHHHCCCCCCC        |
| 974 | EEELRKFLEQYNNEEEDMRYQRQGFQKGHSS | -46.42 | 45.2 | HHHHHHHHHHHCHHHHHHHHHHHHCCCCCCC        |
| 211 | EEELRKFLEQYNNEHEDMRYQQQGFQKGHSA | -46.42 | 45.2 | HHHHHHHHHHHHHHHHHHHHHHHHHHHHHHHCCCCCCC |
| 452 | EEELRKFLEQYNNESEDIRYQQQGFQKGHSS | -46.42 | 45.2 | HHHHHHHHHHHHHHHHHHHHHHHHHHHHHHHCCCCCCC |
| 858 | EEELRKFLEQYNNESEDMRYQKEGFGKGHSA | -46.42 | 45.2 | HHHHHHHHHHHHHHHHHHHHHHHHHHHHHHHCCCCCCC |
| 810 | EEELRKFLEQYNNESEDMRYQQQGFQKGHSS | -46.42 | 45.2 | HHHHHHHHHHHHHHHHHHHHHHHHHHHHHHHCCCCCCC |
| 067 | EEELRKFLEQYNNESEDMRYQQQGFQKGHSS | -46.42 | 45.2 | HHHHHHHHHHHHHHHHHHHHHHHHHHHHHHHCCCCCCC |
| 724 | EEELRKFLEQYNNESEDMRYQQQGFQKGHQS | -46.42 | 45.2 | HHHHHHHHHHHHHHHHHHHHHHHHHHHHHHHCCCCCCC |
| 431 | EEELRKFLEQYNNESEDMRYQQQGFQKGHSA | -46.42 | 45.2 | HHHHHHHHHHHHHHHHHHHHHHHHHHHHHHHCCCCCCC |
| 588 | EEELRKFLEQYNNESEDMRYQQQGFQKGHSS | -46.42 | 45.2 | HHHHHHHHHHHHHHHHHHHHHHHHHHHHHHHCCCCCCC |
| 381 | EEELRKFLEQYNNESEDMRYQRYGFGKGHSA | -46.42 | 45.2 | HHHHHHHHHHHHHHHHHHHHHHHHHHHHHCCCCCCC   |
| 883 | EEELRKFLEQYNNEYEDEEYQRKGFGKGHSA | -46.42 | 45.2 | HHHHHHHHHHHHHHHHHHHHHHHHHHHHHCCCCCCC   |
| 842 | EEELRKFLEQYNNEYEDEEYQRKGFGKGHSS | -46.42 | 45.2 | HHHHHHHHHHHHHHHHHHHHHHHHHHHHHCCCCCCC   |
| 418 | EEELRKFLEQYNNEYEDMFYQQKGFQKGHSS | -46.42 | 48.4 | HHHHHHHHHHHHHHHHHHHHHHHHHHHHHHHCCCCCCC |
| 729 | EEEWKKFIEQFNNEYEDEEYQRKGFGKGHQS | -46.42 | 48.4 | HHHHHHHHHHHHHHHHHHHHHHHHHHHHHHHCCCCCCC |
| 880 | EQELRKFLEQYNNEAEDMRYQQQGFQKGHSS | -46.42 | 45.2 | HHHHHHHHHHHHHHHHHHHHHHHHHHHHHCCCCCCC   |
| 687 | EQELRKFLEQYNNEEEDMRYQREGFGKGHSA | -46.42 | 41.9 | HHHHHHHHHHHHHHHHHHHHHHHHHHHHHCCCCCCC   |
| 399 | EQELRKFLEQYNNEEEDMSYQRYGFGKGHQA | -46.42 | 41.9 | HHHHHHHHHHHHHHHHHHHHHHHHHHHHHCCCCCCC   |
| 546 | EQELRKFLEQYNNESEDERYQQQGFQKGHSS | -46.42 | 41.9 | HHHHHHHHHHHHHCHHHHHHHHHHCCCCCCC        |
| 552 | EQELRKFLEQYNNESEDMRYQRYGFGKGHQS | -46.42 | 41.9 | HHHHHHHHHHHHHHHHHHHHHHHHHHHHHCCCCCCC   |
| 300 | EEELKKILEKLNQEKEQMSYQQQGFQGHSA  | -46.40 | 41.9 | HHHHHHHHHHHHHHHHHHHHHHHHHHHHHCCCCCCC   |
| 397 | EEELKKLLEQINNEEEDMRYQQYGFQKGHSS | -46.39 | 45.2 | HHHHHHHHHHHHHHHHHHHHHHHHHHHHHCCCCCCC   |
| 837 | EEELKKLLDKINQEEQIRYQQQGFQGDSS   | -46.38 | 51.6 | HHHHHHHHHHHHHHHHHHHHHHHHHHHHHCCCCCCC   |
| 295 | EEELKKLLEKINNEAEDMRYQQQGFQKGHSS | -46.36 | 51.6 | HHHHHHHHHHHHHHHHHHHHHHHHHHHHHCCCCCCC   |
| 416 | EEELKKLLEKINNEEEDRRYQREGFGKGHSA | -46.36 | 48.4 | HHHHHHHHHHHHHHHHHHHHHHHHHHHHHCCCCCCC   |
| 008 | EEELRKLLEKINNEQEDRSYQQQGFQKGHSA | -46.36 | 45.2 | HHHHHHHHHHHHHHHHHHHHHHHHHHHHHCCCCCCC   |
| 056 | EEEKMKMLEQINQEADMRYQRYGFGKGHSA  | -46.32 | 48.4 | HHHHHHHHHHHHHHHHHHHHHHHHHHHHHCCCCCCC   |
| 868 | EEEKMKMLEQINQEEDMRYQQYGFQKGHSS  | -46.32 | 45.2 | HHHHHHHHHHHHHHHHHHHHHHHHHHHHHCCCCCCC   |
| 209 | EEEKMKMLEQINQEEDMSYQQQGFQKGHSS  | -46.32 | 45.2 | HHHHHHHHHHHHHHHHHHHHHHHHHHHHHCCCCCCC   |
| 893 | EEEKMKMLEQYNQESDMRYQQQGFQKGHSA  | -46.32 | 45.2 | HHHHHHHHHHHHHHHHHHHHHHHHHHHHHCCCCCCC   |
| 936 | EEEKMKMLEQINQEADMRYQKEGFGKGHSA  | -46.32 | 45.2 | HHHHHHHHHHHHHHHHHHHHHHHHHHHHHCCCCCCC   |
| 914 | EEEKMKMLEQINQEEDMRYQRYGFGKGHSA  | -46.32 | 41.9 | HHHHHHHHHHHHHHHHHHHHHHHHHHHHHCCCCCCC   |
| 044 | EEEKMKFLDQYNDAEQMRYQRQGFQGHQS   | -46.30 | 41.9 | HHHHHHHHHHHHHHHHHHHHHHHHHHHHHCCCCCCC   |
| 857 | EEEWKKWIEQLNNEQEDMRYQRYGFGKGHSS | -46.29 | 41.9 | HHHHHHHHHHHHHHHHHHHHHHHHHHHHHCCCCCCC   |
| 308 | EEELKKLLEQINNEAEDIRYQQQGFQKGDSR | -46.25 | 54.8 | HHHHHHHHHHHHHHHHHHHHHHHHHHHHHCCCCCCC   |
| 197 | EEELKKLLEQINNEEEDERYQQQGFQKGDSR | -46.25 | 51.6 | HHHHHHHHHHHHHHHHHHHHHHHHHHHHHCCCCCCC   |
| 502 | EEELKKLLEQINNEEEDMRYQREGFGKGDSR | -46.25 | 51.6 | HHHHHHHHHHHHHHHHHHHHHHHHHHHHHCCCCCCC   |
| 259 | EEELKKLLEQLNNEKEDMRYQQQGFQKGDSR | -46.25 | 51.6 | HHHHHHHHHHHHHHHHHHHHHHHHHHHHHCCCCCCC   |
| 165 | EEELRKLLEQINNEAEDMRYQQQGFQKGDSR | -46.25 | 51.6 | HHHHHHHHHHHHHHHHHHHHHHHHHHHHHCCCCCCC   |
| 605 | EEELKKLLEKLNNEKEDMRYQQKGFQKGDSR | -46.24 | 54.8 | HHHHHHHHHHHHHHHHHHHHHHHHHHHHHCCCCCCC   |
| 269 | EEELRKFLEKLNNEEQIRYQQQGFQGRHSA  | -46.23 | 41.9 | HHHHHHHHHHHCHHHHHHHHHHHHCCCCCCC        |
| 212 | EEELKKFLEQFNQEYEDMRYQQEFGFGHSA  | -46.20 | 51.6 | HHHHHHHHHHHHHHHHHHHHHHHHHHHHHCCCCCCC   |
| 105 | EEELRKFLEQMNNEKEDMEYQRAGFGKGHSA | -46.18 | 45.2 | HHHHHHHHHHHHHHHHHHHHHHHHHHHHHCCCCCCC   |
| 877 | EEELRKFLEQYNNEEEDMRYQREGFGKGHQS | -46.18 | 45.2 | HHHHHHHHHHHCHHHHHHHHHHHHCCCCCCC        |
| 784 | EEELKKILEKFNNEYEQMFYQQKGFQGHSA  | -46.11 | 48.4 | HHHHHHHHHHHHHHHHHHHHHHHHHHHHHCCCCCCC   |
| 086 | EEELKKILEKFNNEYEQMFYQQQGFQGHSS  | -46.11 | 48.4 | HHHHHHHHHHHHHHHHHHHHHHHHHHHHHCCCCCCC   |
| 852 | EEELRKLILEKINNEEQIRYQQQGFQGHSA  | -46.11 | 38.7 | HHHHHHHHHHHCHHHHHHHHHHHHCCCCCCC        |
| 584 | EEELRKLILEKINNEKEQMEYQRNGSQGHSY | -46.11 | 38.7 | HHHHHHHHHHHHHHHHHHHHHHHHHHHHHCCCCCCC   |
| 716 | EEELRKLILEKLNNEKEQMSYQQQGFQGHSA | -46.11 | 38.7 | HHHHHHHHHHHHHHHHHHHHHHHHHHHHHCCCCCCC   |
| 534 | EQELRKLILEKINNEQEQMSYQQQGFQGHSS | -46.11 | 35.5 | HHHHHHHHHHHHHHHHHHHHHHHHHHHHHCCCCCCC   |
| 791 | EEEWRKFLEQYNNESEDMRYQQYGFQKGHSA | -46.10 | 45.2 | HHHHHHHHHHHHHHHHHHHHHHHHHHHHHCCCCCCC   |
| 887 | EEELKKFLEQYNNEAEDMRYQQQGFQKGHQA | -46.10 | 51.6 | HHHHHHHHHHHHHHHHHHHHHHHHHHHHHCCCCCCC   |
| 315 | EEEKRFKLDKYNQESQIRYQQQGFQGHSS   | -46.07 | 45.2 | HHHHHHHHHHHHHHHHHHHHHHHHHHHHHCCCCCCC   |
| 666 | EEELRKFLEQFNNEKEQMFYQQQGFQGRHSS | -46.06 | 41.9 | HHHHHHHHHHHHHHHHHHHHHHHHHHHHHCCCCCCC   |
| 985 | EEELKKLLEQINNEAEDERYQQQGFQKGNSN | -46.05 | 48.4 | HHHHHHHHHHHHHHHHHHHHHHHHHHHHHCCCCCCC   |
| 365 | EEELRKLLEQINNEAEDERYQQQGFQKGNSN | -46.05 | 45.2 | HHHHHHHHHHHHHHHHHHHHHHHHHHHHHCCCCCCC   |
| 995 | EEELRKFLEQFNQEYEDMFYQQKGFQKGHSA | -46.05 | 51.6 | HHHHHHHHHHHHHHHHHHHHHHHHHHHHHCCCCCCC   |
| 661 | EEELKKLLEQINQEEDMRYQQQGFQKGDSR  | -46.04 | 51.6 | HHHHHHHHHHHHHHHHHHHHHHHHHHHHHCCCCCCC   |
| 232 | EEELKKLLEQLNQEKEDMRYQREGFGKGDSR | -46.04 | 51.6 | HHHHHHHHHHHHHHHHHHHHHHHHHHHHHCCCCCCC   |

|     |                                  |        |      |                                 |
|-----|----------------------------------|--------|------|---------------------------------|
| 353 | EEELRKLLEQINQEKEDEEYQRYGFGKGS    | -46.04 | 48.4 | HHHHHHHHHHHHHHHHHHHHHHCCCCCCCC  |
| 506 | EEEARKMLEQINNEEDDMRYQREGFGKGHSA  | -46.03 | 45.2 | HHHHHHHHHHHHHHHHHHHHHHCCCCCCCC  |
| 347 | EEEARKMLEQINNEQEDMSYQRHGFKGHSS   | -46.03 | 45.2 | HHHHHHHHHHHHHHHHHHHHHHCCCCCCCC  |
| 854 | EEEKMKMLEQINNEAEDDMRYQREGFGKGHQS | -46.03 | 48.4 | HHHHHHHHHHHHHHHHHHHHHHCCCCCCCC  |
| 054 | EEEKMKMLEQINNEAEDDMRYQREGFGKGHSA | -46.03 | 48.4 | HHHHHHHHHHHHHHHHHHHHHHCCCCCCCC  |
| 310 | EEEKMKMLEQINNEEDDKRYQREGVKGHSS   | -46.03 | 45.2 | HHHHHHHHHHHHHHHHHHHHHHCCCCCCCC  |
| 831 | EEEKMKMLEQINNEEDDMRYQQQGFKGHQS   | -46.03 | 45.2 | HHHHHHHHHHHHHHHHHHHHHHCCCCCCCC  |
| 713 | EEEKMKMLEQINNEEDDMRYQQQGFKGHSS   | -46.03 | 45.2 | HHHHHHHHHHHHHHHHHHHHHHCCCCCCCC  |
| 042 | EEEKMKMLEQINNEEDDMRYQQYGFKGHSA   | -46.03 | 45.2 | HHHHHHHHHHHHHHHHHHHHHHCCCCCCCC  |
| 549 | EEEKMKMLEQYNNEEDDMRYQREGFGKGHSA  | -46.03 | 45.2 | HHHHHHHHHHHCHHHHHHHHHHHCCCCCCCC |
| 902 | EEEKRMKMLEQINNEEDDKRYQREGFGKGHSS | -46.03 | 41.9 | HHHHHHHHHHHHHHHHHHHHHHCCCCCCCC  |
| 828 | EEEKMKMLEQINNEEDDMRYQQYGFKGHQP   | -46.01 | 41.9 | HHHHHHHHHHHHHHHHHHHHHHCCCCCCCC  |
| 085 | EEQLRKLFLEQYNNEEDDMRYQREGFGKGHQS | -45.98 | 48.4 | HHHHHHHHHHHHHHHHHHHHHHCCCCCCCC  |
| 449 | EEQLRKLFLEQYNNEEDDMRYQRQGFKGHSA  | -45.98 | 48.4 | HHHHHHHHHHHHHHHHHHHHHHCCCCCCCC  |
| 387 | EEELRKLFLEQYNQESDDMRYQRYGFGKGS   | -45.98 | 51.6 | HHHHHHHHHHHHHHHHHHHHHHCCCCCCCC  |
| 179 | EEELKKFLEKFNNEEYDMFYQKGFKGGS     | -45.94 | 64.5 | HHHHHHHHHHHHHHHHHHHHHHCCCCCCCC  |
| 287 | EEELKKFLEKYNNEAEDIYYQQQGFKGGS    | -45.94 | 61.3 | HHHHHHHHHHHHHHHHHHHHHHCCCCCCCC  |
| 802 | EEELKKFLEKYNNEAEDDMRYQQQGFKGGS   | -45.94 | 61.3 | HHHHHHHHHHHHHHHHHHHHHHCCCCCCCC  |
| 173 | EEELKKFLEKYNNEEDDMRYQRYGFGKGS    | -45.94 | 58.1 | HHHHHHHHHHHHHHHHHHHHHHCCCCCCCC  |
| 617 | EEELKKFLEKYNNEEYDMEYQRKGFKGGS    | -45.94 | 58.1 | HHHHHHHHHHHHHHHHHHHHHHCCCCCCCC  |
| 181 | EEELRKFLFKFNNEKEDDMRYQQQGFKGGS   | -45.94 | 58.1 | HHHHHHHHHHHHHHHHHHHHHHCCCCCCCC  |
| 406 | EEELRKFLFKYNNEAEDIRYQQQGFKGGS    | -45.94 | 58.1 | HHHHHHHHHHHHHHHHHHHHHHCCCCCCCC  |
| 283 | EEELRKFLFKYNNEAEDDMRYQRQGFKGGS   | -45.94 | 58.1 | HHHHHHHHHHHHHHHHHHHHHHCCCCCCCC  |
| 763 | EEELRKFLFKYNNEEDDMRYQKEGFKGGS    | -45.94 | 54.8 | HHHHHHHHHHHHHHHHHHHHHHCCCCCCCC  |
| 717 | EEELRKFLFKYNNEEDDMRYQRKGFKGGS    | -45.94 | 54.8 | HHHHHHHHHHHHHHHHHHHHHHCCCCCCCC  |
| 469 | EEELKKFLEKYNNESEDMMRYQQQGFKGGS   | -45.93 | 58.1 | HHHHHHHHHHHHHHHHHHHHHHCCCCCCCC  |
| 988 | EEELKKFLEKYNNEEYDMFYQKGFKGGS     | -45.93 | 61.3 | HHHHHHHHHHHHHHHHHHHHHHCCCCCCCC  |
| 614 | EEEWKKFLFKYNNESEDMMRYQQQGFKGGS   | -45.93 | 54.8 | HHHHHHHHHHHHHHHHHHHHHHCCCCCCCC  |
| 382 | EEELRKILLDQINQEEQMMRYQQYGFQGHS   | -45.93 | 38.7 | HHHHHHHHHHHHHHHHHHHHHHCCCCCCCC  |
| 155 | EEELRKFLFKFNNEEHHKRRQREGFGSGKSA  | -45.92 | 41.9 | HHHHHHHHHHHCHHHHHHHHHHHCCCCCCCC |
| 156 | EEELRKILEKINNEQEOMSYYQQQGFQGHS   | -45.88 | 38.7 | HHHHHHHHHHHHHHHHHHHHHHCCCCCCCC  |
| 864 | EEELRKILEKLNNEEQDMRYQRQGFQGHS    | -45.88 | 38.7 | HHHHHHHHHHHHHHHHHHHHHHCCCCCCCC  |
| 543 | EEEKMKMLEQIENEREDEEYQONMGKGHQP   | -45.87 | 41.9 | HHHHHHHHHHHHHHHHHHHHHHCCCCCCCC  |
| 187 | EEEARKMLDKINNEEQMRYQREGFGQGHSS   | -45.85 | 45.2 | HHHHHHHHHHHHHHHHHHHHHHCCCCCCCC  |
| 850 | EEEKMKMLDKINNEAQMRYQREGMGQGHQP   | -45.85 | 48.4 | HHHHHHHHHHHHHHHHHHHHHHCCCCCCCC  |
| 343 | EEEKRFLEQFNNEEYDMFYQKGFKGHSS     | -45.82 | 51.6 | HHHHHHHHHHHHHHHHHHHHHHCCCCCCCC  |
| 898 | EEELKKFLEKYNNEADRRYQRYGFGKGHQS   | -45.79 | 54.8 | HHHHHHHHHHHHHHHHHHHHHHCCCCCCCC  |
| 705 | EEELKKFLEKYNNEEDRRYQQQGFKGHSS    | -45.79 | 51.6 | HHHHHHHHHHHHHHHHHHHHHHCCCCCCCC  |
| 429 | EEELKKFLEKYNNEEDRRYQRYGFGKGHSA   | -45.79 | 51.6 | HHHHHHHHHHHHHHHHHHHHHHCCCCCCCC  |
| 696 | EEELRKFLFKFNNEEYDRFYQKGFKGHSS    | -45.79 | 54.8 | HHHHHHHHHHHHHHHHHHHHHHCCCCCCCC  |
| 119 | EEELRKFLFKLNNEKEDREYQRAFFGKGHSS  | -45.79 | 48.4 | HHHHHHHHHHHHHHHHHHHHHHCCCCCCCC  |
| 153 | EEELRKFLFKYNNEADRRYQRQGFKGHQS    | -45.79 | 51.6 | HHHHHHHHHHHHHHHHHHHHHHCCCCCCCC  |
| 875 | EQELRKFLFKYNNEADRRYQRYGFGKGHSS   | -45.79 | 48.4 | HHHHHHHHHHHHHHHHHHHHHHCCCCCCCC  |
| 776 | EEEKRMKMLEQFNNEKEDDMRYQQQGFKGHQA | -45.79 | 45.2 | HHHHHHHHHHHHHHHHHHHHHHCCCCCCCC  |
| 551 | EEELRKFLQFNNEEYDMFYQKGFKGHSS     | -45.78 | 51.6 | HHHHHHHHHHHHHHHHHHHHHHCCCCCCCC  |
| 074 | EEELKKLLEQINNEAHEMRKQQQGFSGKSR   | -45.76 | 41.9 | HHHHHHHHHHHHHHHHHHHHHHCCCCCCCC  |
| 036 | EEELKKLLEQINNEAEDDMRYQQQGFKGGS   | -45.74 | 54.8 | HHHHHHHHHHHHHHHHHHHHHHCCCCCCCC  |
| 052 | EEELKKLLEQINNEAEDDMRYQRYGFGKGS   | -45.74 | 54.8 | HHHHHHHHHHHHHHHHHHHHHHCCCCCCCC  |
| 200 | EEELKKLLEQINNEKEDEEYQRYGFGKGS    | -45.74 | 51.6 | HHHHHHHHHHHHHHHHHHHHHHCCCCCCCC  |
| 147 | EEELKKLLEQLNNEKEDDMRYQREGFGKGS   | -45.74 | 51.6 | HHHHHHHHHHHHHHHHHHHHHHCCCCCCCC  |
| 990 | EEELKKLLEQLNNEKEDDMRYQRQGFKGGS   | -45.74 | 51.6 | HHHHHHHHHHHHHHHHHHHHHHCCCCCCCC  |
| 769 | EEELRKLLEQINNEEDDMRYQQQGFKGGS    | -45.74 | 48.4 | HHHHHHHHHHHHHHHHHHHHHHCCCCCCCC  |
| 193 | EEELRKLLEQINNEEDDMRYQREGFGKGS    | -45.74 | 48.4 | HHHHHHHHHHHHHHHHHHHHHHCCCCCCCC  |
| 983 | EEELRKLLEQINNEKEDMEYQRAFFGKGS    | -45.74 | 48.4 | HHHHHHHHHHHHHHHHHHHHHHCCCCCCCC  |
| 788 | EEELRKLLEQLNNEKEDDMRYQQQGFKGGS   | -45.74 | 48.4 | HHHHHHHHHHHHHHHHHHHHHHCCCCCCCC  |
| 774 | EQELRKLLEQINNEAEDERYQQQGFKGGS    | -45.74 | 48.4 | HHHHHHHHHHHHHHHHHHHHHHCCCCCCCC  |
| 208 | EEEKRFLEQYNNEAEDDMRYQQYGFKGGS    | -45.69 | 54.8 | HHHHHHHHHHHHHHHHHHHHHHCCCCCCCC  |
| 595 | EEELKKFLEQFNNEEYDMFYQKGFKGGS     | -45.69 | 61.3 | HHHHHHHHHHHHHHHHHHHHHHCCCCCCCC  |
| 688 | EEELKKFLEQFNNEEYDMYYQQQGFKGGS    | -45.69 | 58.1 | HHHHHHHHHHHHHHHHHHHHHHCCCCCCCC  |
| 009 | EEELKKFLEQYNNEAEDIYYQQNGFGKGS    | -45.69 | 58.1 | HHHHHHHHHHHHHHHHHHHHHHCCCCCCCC  |
| 093 | EEELKKFLEQYNNESEDERYQQNGFGKGS    | -45.69 | 54.8 | HHHHHHHHHHHCSHHHHHHHHHHCCCCCCCC |
| 540 | EEELRKFLFKFNNEEYDMFYQKGFKGGS     | -45.69 | 58.1 | HHHHHHHHHHHHHHHHHHHHHHCCCCCCCC  |
| 065 | EEELRKFLFKLNNEKEDMEYQRAFFGKGS    | -45.69 | 51.6 | HHHHHHHHHHHHHHHHHHHHHHCCCCCCCC  |
| 178 | EEELRKFLFKYNNEEDDMRYQREGFGKGS    | -45.69 | 51.6 | HHHHHHHHHHHCHHHHHHHHHHHCCCCCCCC |
| 755 | EEELRKFLFKYNNEEYDMFYQKGFKGGS     | -45.69 | 54.8 | HHHHHHHHHHHHHHHHHHHHHHCCCCCCCC  |
| 805 | EQELRKFLFKFNNEEYDEFYQKGFKGGS     | -45.69 | 54.8 | HHHHHHHHHHHHHHHHHHHHHHCCCCCCCC  |
| 474 | EQELRKILEKLNNEKEQMSYYQQQGFQGHQS  | -45.65 | 35.5 | HHHHHHHHHHHHHHHHHHHHHHCCCCCCCC  |

|     |                                   |        |      |                                        |
|-----|-----------------------------------|--------|------|----------------------------------------|
| 186 | EEELKKILEQLNNEQEDMRYQRQGFQGHSS    | -45.63 | 45.2 | HHHHHHHHHHHHHHHHHHHHHHHHHHHHHCCCCCCC   |
| 924 | EEELKKILEKLNNEKEQMRYQQQGFQGHSA    | -45.63 | 41.9 | HHHHHHHHHHHHHHHHHHHHHHHHHHHHHCCCCCCC   |
| 278 | EEEKRMLEQINQEEDQRYQQQGFQGHSSA     | -45.59 | 48.4 | HHHHHHHHHHHHHHHHHHHHHHHHHHHHHCCCCCCC   |
| 728 | EEELRKFLLEKFNNEYEDRFYQQKGFQGHSS   | -45.56 | 54.8 | HHHHHHHHHHHHHHHHHHHHHHHHHHHHHCCCCCCC   |
| 768 | EEELRKFLDQYNNEEEMRYQREGFGQGHSS    | -45.54 | 41.9 | HHHHHHHHHHHCHHHHHHHHHHHHHHHHHHHCCCCCCC |
| 823 | EEELKKFLDQYNQEEEEQMFQREGFGQGHSS   | -45.53 | 41.9 | HHHHHHHHHHHHHHHHHHHHHHHHHHHHHCCCCCCC   |
| 670 | EEEARKFLDQYNNEYEQMRYQQQGFQGHSS    | -45.52 | 45.2 | HHHHHHHHHHHHHHHHHHHHHHHHHHHHHCCCCCCC   |
| 622 | EEELRKFLDQYNNEAEQIYYQNGFGQGHSA    | -45.52 | 45.2 | HHHHHHHHHHHHHHHHHHHHHHHHHHHHHCCCCCCC   |
| 421 | EEEARKMLQQINNEADRRYQREGFGQGHSSA   | -45.50 | 48.4 | HHHHHHHHHHHHHHHHHHHHHHHHHHHHHCCCCCCC   |
| 836 | EEELRKFLLEQYNNEEDMRYQREGFGQGHSSA  | -45.48 | 45.2 | HHHHHHHHHHHCHHHHHHHHHHHHHHHHHHHCCCCCCC |
| 921 | EEELKKFLLEQYNQEEEDMRYQRQGFQGHSSA  | -45.47 | 54.8 | HHHHHHHHHHHHHHHHHHHHHHHHHHHHHCCCCCCC   |
| 532 | EEELRKFLLEQFNQEEYQMFYQQKGFQGHSSA  | -45.47 | 58.1 | HHHHHHHHHHHHHHHHHHHHHHHHHHHHHCCCCCCC   |
| 558 | EEELRKFLLEQYNQEESEDMRYQQQGFQGHSSA | -45.47 | 51.6 | HHHHHHHHHHHHHHHHHHHHHHHHHHHHHCCCCCCC   |
| 813 | EEELRKFLLEQYNQEEYQYQRKGFQGHSSA    | -45.47 | 51.6 | HHHHHHHHHHHHHHHHHHHHHHHHHHHHHCCCCCCC   |
| 853 | EEELKKFLDSLNNREEDMRYQRYGFGQGHSSA  | -45.40 | 54.8 | HHHHHHHHHHHHHHHHHHHHHHHHHHHHHCCCCCCC   |
| 423 | EEELRKILEQINQEEEEQMFYQQQGFQGHSSA  | -45.40 | 35.5 | HHHHHHHHHHHHHHHHHHHHHHHHHHHHHCCCCCCC   |
| 539 | EEELKKLLEKINQEAQEMRYQKGFQGHSSA    | -45.39 | 45.2 | HHHHHHHHHHHHHHHHHHHHHHHHHHHHHCCCCCCC   |
| 796 | EEELKKLLEKLNQEKEQMRYQRYGFGQGHSSA  | -45.39 | 41.9 | HHHHHHHHHHHHHHHHHHHHHHHHHHHHHCCCCCCC   |
| 379 | EEELKKLLEKLNQEYQMFYQRQGFQGHSSA    | -45.39 | 38.7 | HHHHHHHHHHHHHHHHHHHHHHHHHHHHHCCCCCCC   |
| 230 | EEEWKLMKYNQEESEQMRYQRYGFGQGHSSA   | -45.39 | 38.7 | HHHHHHHHHHHHHHHHHHHHHHHHHHHHHCCCCCCC   |
| 255 | EQELRKLLEKINQEYQKSYQQGFQGHSSA     | -45.39 | 35.5 | HHHHHHHHHHHHHHHHHHHHHHHHHHHHHCCCCCCC   |
| 392 | EEELRKLLEKLNNEKEQMSFQQQGFQGHSSA   | -45.38 | 38.7 | HHHHHHHHHHHHHHHHHHHHHHHHHHHHHCCCCCCC   |
| 184 | EEELKKILEKINNEEEQMFYQQYGFQGHSSA   | -45.38 | 48.4 | HHHHHHHHHHHCHHHHHHHHHHHHHHHHHHHCCCCCCC |
| 694 | EEELRKILEKLNNEKEQMRYQRYGFGQGHSSA  | -45.35 | 45.2 | HHHHHHHHHHHHHHHHHHHHHHHHHHHHHCCCCCCC   |
| 710 | EEELRKFLLEKYNQEYQMFYQRYGFGQGHSSA  | -45.35 | 54.8 | HHHHHHHHHHHHHHHHHHHHHHHHHHHHHCCCCCCC   |
| 732 | EEEKRMLEQINNEEKEDMEYQYRAGFGQGHSSA | -45.29 | 48.4 | HHHHHHHHHHHHHHHHHHHHHHHHHHHHHCCCCCCC   |
| 356 | EEQKRKMLEQINNEAEQMRYQRQGFQGHSSA   | -45.23 | 41.9 | HHHHHHHHHHHHHHHHHHHHHHHHHHHHHCCCCCCC   |
| 521 | EEELRKILEKINNEEEQMFYQREGFGQGHSSA  | -45.21 | 38.7 | HHHHHHHHHHHCHHHHHHHHHHHHHHHHHHHCCCCCCC |
| 370 | EEEKRMFLLEQYNNEAEHMRKQQQGFQGHSSA  | -45.19 | 41.9 | HHHHHHHHHHHHHHHHHHHHHHHHHHHHHCCCCCCC   |
| 712 | EEEKRMFLLEQYNNEEDMRYQQQGFQGHSSA   | -45.18 | 51.6 | HHHHHHHHHHHHHHHHHHHHHHHHHHHHHCCCCCCC   |
| 453 | EEELKKFLLEQLNNEEDMRYQQYGFQGHSSA   | -45.18 | 54.8 | HHHHHHHHHHHHHHHHHHHHHHHHHHHHHCCCCCCC   |
| 484 | EEELKKFLLEQYNNEAEDMRYQQQGFQGHSSA  | -45.18 | 58.1 | HHHHHHHHHHHHHHHHHHHHHHHHHHHHHCCCCCCC   |
| 486 | EEELKKFLLEQYNNEAEDMRYQQYGFQGHSSA  | -45.18 | 58.1 | HHHHHHHHHHHHHHHHHHHHHHHHHHHHHCCCCCCC   |
| 087 | EEELKKFLLEQYNNEEDMRYQQQGFQGHSSA   | -45.18 | 54.8 | HHHHHHHHHHHHHHHHHHHHHHHHHHHHHCCCCCCC   |
| 943 | EEELKKFLLEQYNNEYEYDMFYQQKGFQGHSSA | -45.18 | 58.1 | HHHHHHHHHHHHHHHHHHHHHHHHHHHHHCCCCCCC   |
| 191 | EEELRKFLLEQFNNEYEDDEYQRKGFQGHSSA  | -45.18 | 54.8 | HHHHHHHHHHHHHHHHHHHHHHHHHHHHHCCCCCCC   |
| 778 | EEELRKFLLEQYNNEAEDMRYQQQGFQGHSSA  | -45.18 | 54.8 | HHHHHHHHHHHHHHHHHHHHHHHHHHHHHCCCCCCC   |
| 294 | EEELRKFLLEQYNNESEDERYQQQGFQGHSSA  | -45.18 | 51.6 | HHHHHHHHHHHCHHHHHHHHHHHHHHHHHHHCCCCCCC |
| 400 | EEELRKFLLEQYNNEAEDMRYQQQGFQGHSSA  | -45.18 | 51.6 | HHHHHHHHHHHHHHHHHHHHHHHHHHHHHCCCCCCC   |
| 084 | EEELRKFLLEQYNNEYEYQMFYQRKGFQGHSSA | -45.18 | 51.6 | HHHHHHHHHHHHHHHHHHHHHHHHHHHHHCCCCCCC   |
| 280 | EEELRKFLLEQYNNEYEYQMFYQRQGFQGHSSA | -45.18 | 51.6 | HHHHHHHHHHHHHHHHHHHHHHHHHHHHHCCCCCCC   |
| 253 | EEELRKFLLEQYNNEYEDMRYQQQGFQGHSSA  | -45.18 | 51.6 | HHHHHHHHHHHHHHHHHHHHHHHHHHHHHCCCCCCC   |
| 794 | EEELKKLLDQINQEKEQMFYQYRAGFGQGHSSA | -45.15 | 48.4 | HHHHHHHHHHHHHHHHHHHHHHHHHHHHHCCCCCCC   |
| 930 | EEELKKLLDDINNRAEDMRYQKGFQGHSSA    | -45.15 | 48.4 | HHHHHHHHHHHHHHHHHHHHHHHHHHHHHCCCCCCC   |
| 668 | EEELKKILEQFNNEEQMFYQQKGFQGHSSA    | -45.12 | 45.2 | HHHHHHHHHHHHHHHHHHHHHHHHHHHHHCCCCCCC   |
| 651 | EEELKKILEQLNNEKEQMRYQQQGFQGHSSA   | -45.12 | 38.7 | HHHHHHHHHHHHHHHHHHHHHHHHHHHHHCCCCCCC   |
| 137 | EEELRKILEQYNNEYEYQMFYQRNGRQGHSSA  | -45.12 | 35.5 | HHHHHHHHHHHHHHHHHHHHHHHHHHHHHCCCCCCC   |
| 357 | EEELKKLLEKINNEAEDRRYQRQGFQGHSSA   | -45.11 | 58.1 | HHHHHHHHHHHHHHHHHHHHHHHHHHHHHCCCCCCC   |
| 160 | EEELRKLLEKINNEAEDRRYQRYGFGQGHSSA  | -45.11 | 54.8 | HHHHHHHHHHHHHHHHHHHHHHHHHHHHHCCCCCCC   |
| 097 | EEELRKLLEKINNEEDRRYQREGFGQGHSSA   | -45.11 | 51.6 | HHHHHHHHHHHHHHHHHHHHHHHHHHHHHCCCCCCC   |
| 939 | EEELKKILEQINNEEQMFYQQYGFQGHSSA    | -45.11 | 38.7 | HHHHHHHHHHHCHHHHHHHHHHHHHHHHHHHCCCCCCC |
| 116 | EEELKKILEQINNEEQMFYQQYGFQGHSSA    | -45.11 | 38.7 | HHHHHHHHHHHCHHHHHHHHHHHHHHHHHHHCCCCCCC |
| 678 | EEELRKILEQINNEKEQMFYQQKGFQGHSSA   | -45.11 | 35.5 | HHHHHHHHHHHHHHHHHHHHHHHHHHHHHCCCCCCC   |
| 950 | EEELRKILEQLNNEKEQMRYQQYGFQGHSSA   | -45.11 | 35.5 | HHHHHHHHHHHHHHHHHHHHHHHHHHHHHCCCCCCC   |
| 144 | EEELRKILEQINNEKEQMRYQQQGFQGHSSA   | -45.11 | 35.5 | HHHHHHHHHHHHHHHHHHHHHHHHHHHHHCCCCCCC   |
| 533 | EEELRKLLEQLNNDKEQMRYQREGFGQGHSSA  | -45.10 | 32.3 | HHHHHHHHHHHHHHHHHHHHHHHHHHHHHCCCCCCC   |
| 573 | EEEWKLMLEQFNNDYEYQMFYQQKGFQGHSSA  | -45.10 | 35.5 | HHHHHHHHHHHHHHHHHHHHHHHHHHHHHCCCCCCC   |
| 364 | EEELKKLLEKINNEAEQIRYQQQGFQGHSSA   | -45.09 | 45.2 | HHHHHHHHHHHHHHHHHHHHHHHHHHHHHCCCCCCC   |
| 504 | EEELKKLLEKINNEAEQRYQRQGFQGHSSA    | -45.09 | 45.2 | HHHHHHHHHHHHHHHHHHHHHHHHHHHHHCCCCCCC   |
| 722 | EEELKKLLEKINNEAEQMRYQREGMGQGHSSA  | -45.09 | 45.2 | HHHHHHHHHHHHHHHHHHHHHHHHHHHHHCCCCCCC   |
| 579 | EEELKKLLEKINNEAEQMRYQRYGFGQGHSSA  | -45.09 | 45.2 | HHHHHHHHHHHHHHHHHHHHHHHHHHHHHCCCCCCC   |
| 888 | EEELKKLLEKINNEAEQMSYQQQGFQGHSSA   | -45.09 | 45.2 | HHHHHHHHHHHHHHHHHHHHHHHHHHHHHCCCCCCC   |
| 372 | EEELKKLLEKINNEEQIRYQQQGFQGHSSA    | -45.09 | 41.9 | HHHHHHHHHHHCHHHHHHHHHHHHHHHHHHHCCCCCCC |
| 519 | EEELKKLLEKINNEEQKRYQREGFGQGHSSA   | -45.09 | 41.9 | HHHHHHHHHHHCHHHHHHHHHHHHHHHHHHHCCCCCCC |
| 807 | EEELKKLLEKINNEEQMFYQREGFGQGHSSA   | -45.09 | 41.9 | HHHHHHHHHHHCHHHHHHHHHHHHHHHHHHHCCCCCCC |
| 876 | EEELKKLLEKINNEEQMFYQRYGFGQGHSSA   | -45.09 | 41.9 | HHHHHHHHHHHCHHHHHHHHHHHHHHHHHHHCCCCCCC |
| 967 | EEELKKLLEKINNEEQMFYQYRAGFGQGHSSA  | -45.09 | 41.9 | HHHHHHHHHHHCHHHHHHHHHHHHHHHHHHHCCCCCCC |

|     |                                    |        |      |                                    |
|-----|------------------------------------|--------|------|------------------------------------|
| 785 | EEELKKLLEKINNEKEQMEYQRRGMGQGHQP    | -45.09 | 41.9 | HHHHHHHHHHHHHHHHHHHHHHHHHHHHHHCCCC |
| 385 | EEELKKLLEKINNEKEQMEYQRYGFGQGHSS    | -45.09 | 41.9 | HHHHHHHHHHHHHHHHHHHHHHHHHHHHHHCCCC |
| 260 | EEELKKLLEKLNNEKEQMRYQQQGFQGHSS     | -45.09 | 41.9 | HHHHHHHHHHHHHHHHHHHHHHHHHHHHHHCCCC |
| 129 | EEELRKLLEKINNEAEQIRYQQQGFQGHSS     | -45.09 | 41.9 | HHHHHHHHHHHHHHHHHHHHHHHHHHHHHHCCCC |
| 470 | EEELRKLLEKINNEAEQMRYYQYGFQGHSS     | -45.09 | 41.9 | HHHHHHHHHHHHHHHHHHHHHHHHHHHHHHCCCC |
| 322 | EEELRKLLEKINNEEQKRYQREGFGQGHSA     | -45.09 | 38.7 | HHHHHHHHHHHCCHHHHHHHHHHHHHHHHHHHHH |
| 464 | EEELRKLLEKINNEEQMRYQQYGFQGHQS      | -45.09 | 38.7 | HHHHHHHHHHHCCHHHHHHHHHHHHHHHHHHHHH |
| 476 | EEELRKLLEKINNEKEQMEYQRAGFGQGHSA    | -45.09 | 38.7 | HHHHHHHHHHHHHHHHHHHHHHHHHHHHHHCCCC |
| 693 | EEELRKLLEKINNEQEOKSYQQQGFQGHSA     | -45.09 | 38.7 | HHHHHHHHHHHHHHHHHHHHHHHHHHHHHHCCCC |
| 905 | EEELRKLLEKINNEQEOKSYQQQGFQGHSS     | -45.09 | 38.7 | HHHHHHHHHHHHHHHHHHHHHHHHHHHHHHCCCC |
| 934 | EEELRKLLEKLNNEKEQIRYQQQGFQGHSS     | -45.09 | 38.7 | HHHHHHHHHHHHHHHHHHHHHHHHHHHHHHCCCC |
| 780 | EEELRKLLEKLNNEQMSYQQQGFQGHQP       | -45.09 | 38.7 | HHHHHHHHHHHHHHHHHHHHHHHHHHHHHHCCCC |
| 222 | EEELRKFLDQYNNYEQEEYQKRGFGQGHSA     | -45.05 | 41.9 | HHHHHHHHHHHHHHHHHHHHHHHHHHHHHHCCCC |
| 987 | EEELKKILEQLNQEKEQMRYQRQGFQGHSA     | -44.93 | 38.7 | HHHHHHHHHHHHHHHHHHHHHHHHHHHHHHCCCC |
| 971 | EEELRKLLEKLNNEKEQMSYQQQGFQGHSA     | -44.86 | 38.7 | HHHHHHHHHHHHHHHHHHHHHHHHHHHHHHCCCC |
| 522 | EEELKKFLEKYNQEAQIYYQQQGFQGHSS      | -44.82 | 48.4 | HHHHHHHHHHHHHHHHHHHHHHHHHHHHHHCCCC |
| 003 | EEELKKFLEKYNQEEQMRYPREGFGQGHSS     | -44.82 | 45.2 | HHHHHHHHHHHCCHHHHHHHHHHHHHHHHHHHHH |
| 309 | EEELRKFLLEKFNQEYQMFYQQKGFGQGHSA    | -44.82 | 48.4 | HHHHHHHHHHHHHHHHHHHHHHHHHHHHHHCCCC |
| 170 | EEELRKFLLEKYNQEEQMSYQRYGFGQGHSS    | -44.82 | 41.9 | HHHHHHHHHHHHHHHHHHHHHHHHHHHHHHCCCC |
| 369 | EEELRKFLLEKFNNEYEQIFFQKGFQGHKSR    | -44.82 | 48.4 | HHHHHHHHHHHHHHHHHHHHHHHHHHHHHHCCCC |
| 719 | EEELRKFLLEKYNNEEQMSFQKEGFGQGHKSR   | -44.82 | 41.9 | HHHHHHHHHHHCCHHHHHHHHHHHHHHHHHHHHH |
| 471 | EEELRKLLEKLNNEQEOMRYQQQGFQGHQA     | -44.80 | 38.7 | HHHHHHHHHHHHHHHHHHHHHHHHHHHHHHCCCC |
| 059 | EEELKKMLEQINNEAEDMRYPQQGFGKGDSDR   | -44.78 | 54.8 | HHHHHHHHHHHHHHHHHHHHHHHHHHHHHHCCCC |
| 772 | EEELKRMLEQINNEAEDMRYPYQYGFQGHKSDR  | -44.78 | 51.6 | HHHHHHHHHHHHHHHHHHHHHHHHHHHHHHCCCC |
| 441 | EEELKRMLEQINNEAEQDEYQKRGFGKGDSDR   | -44.78 | 48.4 | HHHHHHHHHHHHHHHHHHHHHHHHHHHHHHCCCC |
| 141 | EEELKKILEQLNNEKEQKRYQKEGFGQGHSA    | -44.78 | 38.7 | HHHHHHHHHHHHHHHHHHHHHHHHHHHHHHCCCC |
| 738 | EEELKKILEQLNNEQEQERYQQQGFQGHSS     | -44.78 | 38.7 | HHHHHHHHHHHHHHHHHHHHHHHHHHHHHHCCCC |
| 455 | EEELKKLLEKINNEQEOMSYPQQGFGQGHQA    | -44.77 | 41.9 | HHHHHHHHHHHHHHHHHHHHHHHHHHHHHHCCCC |
| 847 | EQELRKLLEKINQEEQIRYQQQGFQGHSDR     | -44.66 | 41.9 | HHHHHHHHHHHHHHHHHHHHHHHHHHHHHHCCCC |
| 839 | EEELKMLEKINNEEEDMRYPREGFGKGHSA     | -44.64 | 48.4 | HHHHHHHHHHHHHHHHHHHHHHHHHHHHHHCCCC |
| 359 | EEELKKLLEQINQEQEQMYQQKGFGQGHQS     | -44.62 | 38.7 | HHHHHHHHHHHHHHHHHHHHHHHHHHHHHHCCCC |
| 219 | EEELKKLLEQINQEAQEFYQKGFQGHQS       | -44.62 | 41.9 | HHHHHHHHHHHHHHHHHHHHHHHHHHHHHHCCCC |
| 090 | EEELRKLLEQINQEAQIRYQQQGFQGHSS      | -44.62 | 38.7 | HHHHHHHHHHHHHHHHHHHHHHHHHHHHHHCCCC |
| 676 | EEELRKLLEQINQEEQMRYPQQGFGQGHSS     | -44.62 | 35.5 | HHHHHHHHHHHHHHHHHHHHHHHHHHHHHHCCCC |
| 517 | EEELRKLLEQINQEEQMRYPQYGFQGHSS      | -44.62 | 35.5 | HHHHHHHHHHHHHHHHHHHHHHHHHHHHHHCCCC |
| 358 | EEELRKLLEQLNQEQQMKYQRYGFGQGHSS     | -44.62 | 35.5 | HHHHHHHHHHHHHHHHHHHHHHHHHHHHHHCCCC |
| 745 | EEELKKLLEKINNEAEQIRYPQQGFGQGHSA    | -44.62 | 45.2 | HHHHHHHHHHHHHHHHHHHHHHHHHHHHHHCCCC |
| 405 | EEELKKLLEKLNNEQEOMRYQQNGFGQGHQS    | -44.62 | 41.9 | HHHHHHHHHHHHHHHHHHHHHHHHHHHHHHCCCC |
| 146 | EEELRKLLEKINNEAEQMFYQQKGFGQGHSS    | -44.62 | 41.9 | HHHHHHHHHHHHHHHHHHHHHHHHHHHHHHCCCC |
| 111 | EEELRKLLEKINNEKEQMEYQKGFQGHSS      | -44.62 | 38.7 | HHHHHHHHHHHHHHHHHHHHHHHHHHHHHHCCCC |
| 870 | EEELRKLLEKLNNEKEQMRYQQYGFQGHSA     | -44.62 | 38.7 | HHHHHHHHHHHHHHHHHHHHHHHHHHHHHHCCCC |
| 394 | EEELKKLLEQINNEEQMRFQQQGFQGHKSR     | -44.62 | 38.7 | HHHHHHHHHHHCCHHHHHHHHHHHHHHHHHHHHH |
| 018 | EEELKRMFLDQFNQYEQMRYQQKGFGQGHSDR   | -44.59 | 54.8 | HHHHHHHHHHHHHHHHHHHHHHHHHHHHHHCCCC |
| 509 | EEELRKILEQINNEAEQMFYQQKGFGQGHSS    | -44.59 | 41.9 | HHHHHHHHHHHHHHHHHHHHHHHHHHHHHHCCCC |
| 499 | EEELRRLLEQINNEAEDMRYPQQGFGKGHQS    | -44.58 | 45.2 | HHHHHHHHHHHHHHHHHHHHHHHHHHHHHHCCCC |
| 773 | EQELRKFLLEKFNNEEYEDRFYQQKGFGKGDSDR | -44.55 | 58.1 | HHHHHHHHHHHHHHHHHHHHHHHHHHHHHHCCCC |
| 565 | EEELKKFLEKFNNEEQMSYQKGFQGHSA       | -44.53 | 48.4 | HHHHHHHHHHHCCHHHHHHHHHHHHHHHHHHHHH |
| 221 | EEELKKFLEKFNNEEQMYQQKGFGQGHSS      | -44.53 | 48.4 | HHHHHHHHHHHHHHHHHHHHHHHHHHHHHHCCCC |
| 189 | EEELKKFLEKYNNEAEQIRYQQQGFQGHSA     | -44.53 | 48.4 | HHHHHHHHHHHHHHHHHHHHHHHHHHHHHHCCCC |
| 744 | EEELKKFLEKYNNEAEQKRYQQQGFQGHSS     | -44.53 | 48.4 | HHHHHHHHHHHHHHHHHHHHHHHHHHHHHHCCCC |
| 918 | EEELKKFLEKYNNEAEQMRYPQQGFGQGHSS    | -44.53 | 48.4 | HHHHHHHHHHHHHHHHHHHHHHHHHHHHHHCCCC |
| 408 | EEELKKFLEKYNNEEQMSYQKEGFGQGHSA     | -44.53 | 45.2 | HHHHHHHHHHHCCHHHHHHHHHHHHHHHHHHHHH |
| 296 | EEELKKFLEKYNNEEQKRYQQKGFQGHQS      | -44.53 | 48.4 | HHHHHHHHHHHHHHHHHHHHHHHHHHHHHHCCCC |
| 012 | EEELKKFLEKYNNEEQMEYQRTGRGQGHSA     | -44.53 | 45.2 | HHHHHHHHHHHHHHHHHHHHHHHHHHHHHHCCCC |
| 984 | EEELKKFLEKYNNEEQMQYQKEGFGQGHSS     | -44.53 | 45.2 | HHHHHHHHHHHHHHHHHHHHHHHHHHHHHHCCCC |
| 245 | EEELRKFLLEKFNNEEQMFYQQKGFGQGHSA    | -44.53 | 48.4 | HHHHHHHHHHHHHHHHHHHHHHHHHHHHHHCCCC |
| 510 | EEELRKFLLEKFNNEEQMFYQQKGFGQGHSS    | -44.53 | 48.4 | HHHHHHHHHHHHHHHHHHHHHHHHHHHHHHCCCC |
| 004 | EEELRKFLLEKFNNEEQMYQQQGFQGHSA      | -44.53 | 45.2 | HHHHHHHHHHHHHHHHHHHHHHHHHHHHHHCCCC |
| 033 | EEELRKFLLEKYNNEAEQIRYQQQGMGQGHQP   | -44.53 | 45.2 | HHHHHHHHHHHHHHHHHHHHHHHHHHHHHHCCCC |
| 247 | EEELRKFLLEKYNNEAEQMRYPQKEGFGQGHQS  | -44.53 | 45.2 | HHHHHHHHHHHHHHHHHHHHHHHHHHHHHHCCCC |
| 456 | EEELRKFLLEKYNNEAEQMRYPQQGFGQGHQS   | -44.53 | 45.2 | HHHHHHHHHHHHHHHHHHHHHHHHHHHHHHCCCC |
| 149 | EEELRKFLLEKYNNEAEQMRYPQRQGFQGHSA   | -44.53 | 45.2 | HHHHHHHHHHHHHHHHHHHHHHHHHHHHHHCCCC |
| 473 | EEELRKFLLEKYNNEEQMRYPQREGFGQGHQS   | -44.53 | 41.9 | HHHHHHHHHHHCCHHHHHHHHHHHHHHHHHHHHH |
| 814 | EEELRKFLLEKYNNEEQMRYPQREGKQGHSS    | -44.53 | 41.9 | HHHHHHHHHHHCCHHHHHHHHHHHHHHHHHHHHH |
| 266 | EEELRKFLLEKYNNEEQMRYPQRQGFQGHSS    | -44.53 | 41.9 | HHHHHHHHHHHCCHHHHHHHHHHHHHHHHHHHHH |
| 626 | EEELRKFLLEKYNNEEQIRYQQQGFQGHSA     | -44.53 | 41.9 | HHHHHHHHHHHHHHHHHHHHHHHHHHHHHHCCCC |
| 227 | EEELRKFLLEKYNNEEQMRYPQQGFGQGHSS    | -44.53 | 41.9 | HHHHHHHHHHHHHHHHHHHHHHHHHHHHHHCCCC |





|     |                                  |        |      |                                    |
|-----|----------------------------------|--------|------|------------------------------------|
| 336 | EEEEKKMLDQINNEAQMRYQRYGFGQGDSR   | -43.89 | 51.6 | HHHHHHHHHHHHHHHHHHHHHHHHHHHCCCCCCC |
| 275 | EEELKKFLQKYNNEEEQMSYQQNGSGQGHSY  | -43.89 | 45.2 | HHHHHHHHHHHHHHHHHHHHHHHHHHHCCCCCCC |
| 523 | EEELKKILEQINNEEEMRYQREGFGQGDSR   | -43.87 | 45.2 | HHHHHHHHHHHCCHHHHHHHHHHHHCCCCCCC   |
| 338 | EEELRKILEQLNNEKEQMRYQRYGFGQGDSR  | -43.87 | 41.9 | HHHHHHHHHHHHHHHHHHHHHHHHHHHCCCCCCC |
| 005 | EEELKKLLEKINNEAEQIRYQQQGFQGGDSR  | -43.85 | 51.6 | HHHHHHHHHHHHHHHHHHHHHHHHHHHCCCCCCC |
| 424 | EEELKKLLEKINNEEEMRYQQYGFQGGDSR   | -43.85 | 48.4 | HHHHHHHHHHHCCHHHHHHHHHHHHCCCCCCC   |
| 130 | EEELRKLLEKINNEKEQMEYQRYGFGQGDSR  | -43.85 | 45.2 | HHHHHHHHHHHHHHHHHHHHHHHHHHHCCCCCCC |
| 279 | EEELRKLLEKLNNEKEQMRYQRQGFQGGDSR  | -43.85 | 45.2 | HHHHHHHHHHHHHHHHHHHHHHHHHHHCCCCCCC |
| 764 | EEELKKLLEQINNEEEMRYQQYGFQGGHSA   | -43.85 | 38.7 | HHHHHHHHHHHCCHHHHHHHHHHHHCCCCCCC   |
| 909 | EEELKKFLEKYNNEEEMRYQREGFGQGDSR   | -43.80 | 51.6 | HHHHHHHHHHHCCHHHHHHHHHHHHCCCCCCC   |
| 099 | EEEWKKILEQLNNEQEMRYQRYGFGQGDSR   | -43.78 | 45.2 | HHHHHHHHHHHHHHHHHHHHHHHHHHHCCCCCCC |
| 789 | EEELKKFLEQYNNEAEMRYQRYGFGQGHS    | -43.78 | 45.2 | HHHHHHHHHHHHHHHHHHHHHHHHHHHCCCCCCC |
| 992 | EEELKKFLEQYNNEHEQMRYQQQGFQGGHQS  | -43.78 | 41.9 | HHHHHHHHHHHHHHHHHHHHHHHHHHHCCCCCCC |
| 884 | EEEKRFLEQYNNEAEMRYQREGKGQGGHSH   | -43.76 | 41.9 | HHHHHHHHHHHHHHHHHHHHHHHHHHHCCCCCCC |
| 844 | EEEKRFLEQYNNEEEMRYQREGFGQGGHQS   | -43.76 | 38.7 | HHHHHHHHHHHCCHHHHHHHHHHHHCCCCCCC   |
| 659 | EEEKRFLEQYNNEEEMRYQREGFGQGGHSS   | -43.76 | 38.7 | HHHHHHHHHHHCCHHHHHHHHHHHHCCCCCCC   |
| 786 | EEELKKFLEQFNNEAQMRYQRGGFGQGGHQP  | -43.76 | 48.4 | HHHHHHHHHHHHHHHHHHHHHHHHHHHCCCCCCC |
| 820 | EEELKKFLEQFNNEYEQMFYQQKGFQGGHQS  | -43.76 | 48.4 | HHHHHHHHHHHHHHHHHHHHHHHHHHHCCCCCCC |
| 273 | EEELKKFLEQLNNEEQEYQRYGFGQGGHQS   | -43.76 | 41.9 | HHHHHHHHHHHHHHHHHHHHHHHHHHHCCCCCCC |
| 249 | EEELKKFLEQYNNEAEMRYQKEGFGQGGHSS  | -43.76 | 45.2 | HHHHHHHHHHHHHHHHHHHHHHHHHHHCCCCCCC |
| 606 | EEELKKFLEQYNNEAEMRYQQQGFQGGHSS   | -43.76 | 45.2 | HHHHHHHHHHHHHHHHHHHHHHHHHHHCCCCCCC |
| 948 | EEELKKFLEQYNNEEQERYQQQGFQGGHSA   | -43.76 | 41.9 | HHHHHHHHHHHCCHHHHHHHHHHHHCCCCCCC   |
| 298 | EEELKKFLEQYNNEEEMRYQREGFGQGGHQS  | -43.76 | 41.9 | HHHHHHHHHHHCCHHHHHHHHHHHHCCCCCCC   |
| 960 | EEELKKFLEQYNNEEEMRYQREGFGQGGHSA  | -43.76 | 41.9 | HHHHHHHHHHHCCHHHHHHHHHHHHCCCCCCC   |
| 840 | EEELKKFLEQYNNEEQIRYQQQGFQGGHSS   | -43.76 | 41.9 | HHHHHHHHHHHHHHHHHHHHHHHHHHHCCCCCCC |
| 384 | EEELKKFLEQYNNEEQMRYQKEGFGQGGHSS  | -43.76 | 41.9 | HHHHHHHHHHHHHHHHHHHHHHHHHHHCCCCCCC |
| 282 | EEELKKFLEQYNNEEQMRYQQNGSGQGHSY   | -43.76 | 41.9 | HHHHHHHHHHHHHHHHHHHHHHHHHHHCCCCCCC |
| 927 | EEELKKFLEQYNNEEQMRYQQQGFQGGHSA   | -43.76 | 41.9 | HHHHHHHHHHHHHHHHHHHHHHHHHHHCCCCCCC |
| 024 | EEELKKFLEQYNNEEQMRYQRYGFGQGGHSA  | -43.76 | 41.9 | HHHHHHHHHHHHHHHHHHHHHHHHHHHCCCCCCC |
| 404 | EEELKKFLEQYNNEYEQMQYQKEGFGQGGHSA | -43.76 | 41.9 | HHHHHHHHHHHHHHHHHHHHHHHHHHHCCCCCCC |
| 731 | EEELRKFLEQFNNEEQMSYQQQGFQGGHSS   | -43.76 | 41.9 | HHHHHHHHHHHHHHHHHHHHHHHHHHHCCCCCCC |
| 468 | EEELRKFLEQLNNEEQMRYQQYGFQGGHQS   | -43.76 | 38.7 | HHHHHHHHHHHHHHHHHHHHHHHHHHHCCCCCCC |
| 758 | EEELRKFLEQYNNEAEMRYQQQGFQGGHQS   | -43.76 | 41.9 | HHHHHHHHHHHHHHHHHHHHHHHHHHHCCCCCCC |
| 409 | EEELRKFLEQYNNEAEMRYQQQGFQGGHSA   | -43.76 | 41.9 | HHHHHHHHHHHHHHHHHHHHHHHHHHHCCCCCCC |
| 420 | EEELRKFLEQYNNEAEMRYQRQGFQGGHQS   | -43.76 | 41.9 | HHHHHHHHHHHHHHHHHHHHHHHHHHHCCCCCCC |
| 210 | EEELRKFLEQYNNEAEMRYQRQGFQGGHSA   | -43.76 | 41.9 | HHHHHHHHHHHHHHHHHHHHHHHHHHHCCCCCCC |
| 730 | EEELRKFLEQYNNEEEMRYQREGFGQGGHSS  | -43.76 | 38.7 | HHHHHHHHHHHCCHHHHHHHHHHHHCCCCCCC   |
| 906 | EEELRKFLEQYNNEHEQMRYQQQGFQGGHSS  | -43.76 | 38.7 | HHHHHHHHHHHHHHHHHHHHHHHHHHHCCCCCCC |
| 229 | EEELRKFLEQYNNEEQERYQRKGFQGGHSS   | -43.76 | 38.7 | HHHHHHHHHHHCCHHHHHHHHHHHHCCCCCCC   |
| 829 | EEELRKFLEQYNNEEQMRYQQQGFQGGHSA   | -43.76 | 38.7 | HHHHHHHHHHHHHHHHHHHHHHHHHHHCCCCCCC |
| 913 | EEELRKFLEQYNNEEQMRYQQQGFQGGHSS   | -43.76 | 38.7 | HHHHHHHHHHHHHHHHHHHHHHHHHHHCCCCCCC |
| 885 | EEELRKFLEQYNNEYEQEYQRKGFQGGHSS   | -43.76 | 38.7 | HHHHHHHHHHHHHHHHHHHHHHHHHHHCCCCCCC |
| 959 | EEELRKFLEQYNNEYEQMFYQQKGFQGGHSS  | -43.76 | 41.9 | HHHHHHHHHHHHHHHHHHHHHHHHHHHCCCCCCC |
| 475 | EEELRKFLEQYNNEYEQMYQQKGFQGGHSS   | -43.76 | 38.7 | HHHHHHHHHHHHHHHHHHHHHHHHHHHCCCCCCC |
| 618 | EEELRKFLEQYNNEEQMRYQRYGFGQGGHSS  | -43.76 | 35.5 | HHHHHHHHHHHHHHHHHHHHHHHHHHHCCCCCCC |
| 148 | EEELRKFLEQYNNRAEQERYQQQGFQGGHSA  | -43.74 | 38.7 | HHHHHHHHHHHHHHHHHHHHHHHHHHHCCCCCCC |
| 953 | EEEEKKMLEQINQEEEMRYQQQGFQGGHSA   | -43.66 | 38.7 | HHHHHHHHHHHHHHHHHHHHHHHHHHHCCCCCCC |
| 818 | EEEEKKMLEQYNQEEEMRYQREGFGQGGHSA  | -43.66 | 38.7 | HHHHHHHHHHHHHHHHHHHHHHHHHHHCCCCCCC |
| 531 | EEEEKKMLEKINNEEQIRYQQQGFQGGHSS   | -43.66 | 41.9 | HHHHHHHHHHHCCHHHHHHHHHHHHCCCCCCC   |
| 908 | EEEEKKMLEKINNEEQMRYQRYGFGQGGHSA  | -43.66 | 41.9 | HHHHHHHHHHHCCHHHHHHHHHHHHCCCCCCC   |
| 482 | EEELRKFLEKYNNEEQMRYQRYGFGQGGHSA  | -43.63 | 41.9 | HHHHHHHHHHHHHHHHHHHHHHHHHHHCCCCCCC |
| 986 | EEEKRFLEQMNNEKEQMEYQRAGFGQGGDSR  | -43.62 | 48.4 | HHHHHHHHHHHHHHHHHHHHHHHHHHHCCCCCCC |
| 443 | EEELRKFLQFNQEYEQMFYQQKGFQGGHSA   | -43.60 | 45.2 | HHHHHHHHHHHHHHHHHHHHHHHHHHHCCCCCCC |
| 545 | EEELRKILDDLNNRKEQMRYQRYGFGQGGHSA | -43.58 | 35.5 | HHHHHHHHHHHHHHHHHHHHHHHHHHHCCCCCCC |
| 721 | EEEKRFLEQFNQEYEQMFYQQKGFQGGHSA   | -43.58 | 45.2 | HHHHHHHHHHHHHHHHHHHHHHHHHHHCCCCCCC |
| 440 | EEELKKFLEQYNQEEEMRYQQQGFQGGHQS   | -43.58 | 41.9 | HHHHHHHHHHHHHHHHHHHHHHHHHHHCCCCCCC |
| 498 | EEELRKFLQYNQEEEMRYQREGFGQGGHQS   | -43.58 | 38.7 | HHHHHHHHHHHHHHHHHHHHHHHHHHHCCCCCCC |
| 225 | EEELRKFLQYNQEYEQMEYQRNRGRQGGHSY  | -43.58 | 38.7 | HHHHHHHHHHHHHHHHHHHHHHHHHHHCCCCCCC |
| 897 | EEELRKFLQYNNEEQMFYQQKGFQGGHQS    | -43.53 | 41.9 | HHHHHHHHHHHHHHHHHHHHHHHHHHHCCCCCCC |
| 567 | EEELKKILEQINQEEEMRYQREGFGQGGDSR  | -43.49 | 45.2 | HHHHHHHHHHHHHHHHHHHHHHHHHHHCCCCCCC |
| 542 | EEELKKLLEQINNEEEMRYQQQGFQGGHSA   | -43.43 | 38.7 | HHHHHHHHHHHCCHHHHHHHHHHHHCCCCCCC   |
| 262 | EEEKRFLEKINNEEQMSYQRHGFGQGGDSR   | -43.40 | 45.2 | HHHHHHHHHHHHHHHHHHHHHHHHHHHCCCCCCC |
| 313 | EEELKKLLEQINQEEEMRYQREGFGQGGDSR  | -43.38 | 45.2 | HHHHHHHHHHHHHHHHHHHHHHHHHHHCCCCCCC |
| 293 | EEELRKLLEQLNQEKEQMSYQQQGFQGGDSR  | -43.38 | 41.9 | HHHHHHHHHHHHHHHHHHHHHHHHHHHCCCCCCC |
| 907 | EEELRKLLEQLNQEKEQMSYQQQGFQGGDSR  | -43.38 | 41.9 | HHHHHHHHHHHHHHHHHHHHHHHHHHHCCCCCCC |
| 824 | EEEARLLEQINNEEEMRYQRYGFGQGGHSA   | -43.37 | 38.7 | HHHHHHHHHHHHHHHHHHHHHHHHHHHCCCCCCC |
| 597 | EEEEKKMLEQINNEEEMRYQQQGFQGGHSA   | -43.37 | 38.7 | HHHHHHHHHHHCCHHHHHHHHHHHHCCCCCCC   |

|     |                                  |        |      |                                   |
|-----|----------------------------------|--------|------|-----------------------------------|
| 751 | EEEEKKMLEQINNEEEQMRYPQREGFGQGHSS | -43.37 | 38.7 | HHHHHHHHHHHHCHHHHHHHHHHHHHCCCCCCC |
| 361 | EEEEKKMLEQINNEEEQMRYPQRYGFGQGHSS | -43.37 | 38.7 | HHHHHHHHHHHHCHHHHHHHHHHHHHCCCCCCC |
| 467 | EEEKRKMLEQINNEAEQMRYPQKEGFGQGHSS | -43.37 | 38.7 | HHHHHHHHHHHHHHHHHHHHHHHHHHCCCCCCC |
| 516 | EEEKRKMLEQINNEAEQMRYPQRFQFGQGHSS | -43.37 | 38.7 | HHHHHHHHHHHHHHHHHHHHHHHHHHCCCCCCC |
| 684 | EEEKRKMLEQINNEAEQMRYPQRYGFGQGHSA | -43.37 | 38.7 | HHHHHHHHHHHHHHHHHHHHHHHHHHCCCCCCC |
| 082 | EEEKRKMLEQINNEEEQMRYPQYQYGFQGHSS | -43.37 | 35.5 | HHHHHHHHHHHHHHHHHHHHHHHHHHCCCCCCC |
| 923 | EEEKRKMLEQINNEQEOMSQQGFGQGHSS    | -43.37 | 35.5 | HHHHHHHHHHHHHHHHHHHHHHHHHHCCCCCCC |
| 505 | EEEKRKFLEKYNNESEQKRYQQQGFQGHSS   | -43.29 | 48.4 | HHHHHHHHHHHHHHHHHHHHHHHHHHCCCCCCC |
| 594 | EEEKRKFLEKYNNEYEQMYQQKGFQGHSS    | -43.29 | 48.4 | HHHHHHHHHHHHHHHHHHHHHHHHHHCCCCCCC |
| 686 | EEELKKFLEKLNNEEEQMRYPQYQYGFQGHSS | -43.29 | 51.6 | HHHHHHHHHHHHCHHHHHHHHHHHHHCCCCCCC |
| 931 | EEELKKFLEKYNNESEQIRYQQQGFQGHSS   | -43.29 | 51.6 | HHHHHHHHHHHHHHHHHHHHHHHHHHCCCCCCC |
| 342 | EEELRKFLEKYNNEAEQIYYQNGFGQGHSS   | -43.29 | 51.6 | HHHHHHHHHHHHHHHHHHHHHHHHHHCCCCCCC |
| 656 | EEELRKFLEKYNNEYEQMFYQQKGFQGHSS   | -43.29 | 51.6 | HHHHHHHHHHHHHHHHHHHHHHHHHHCCCCCCC |
| 303 | EEELKKFLEQLNNEEEQMRYPQYQYGFQGHSS | -43.29 | 41.9 | HHHHHHHHHHHHHHHHHHHHHHHHHHCCCCCCC |
| 422 | EEELKKFLEQYNNESEQMRYPQQQGFQGHSS  | -43.29 | 41.9 | HHHHHHHHHHHHHHHHHHHHHHHHHHCCCCCCC |
| 734 | EEELKKFLEQYNNESEQMRYPQQQGFQGHSS  | -43.29 | 41.9 | HHHHHHHHHHHHHHHHHHHHHHHHHHCCCCCCC |
| 334 | EEELRKFLEQFNNEYEQMFYQQKGFQGHSS   | -43.29 | 45.2 | HHHHHHHHHHHHHHHHHHHHHHHHHHCCCCCCC |
| 320 | EEELRKFLEQYNNESEQMRYPQQQGFQGHQA  | -43.29 | 38.7 | HHHHHHHHHHHHHHHHHHHHHHHHHHCCCCCCC |
| 241 | EEELRKFLEQYNNESEQMRYPQQQGFQGHQA  | -43.29 | 38.7 | HHHHHHHHHHHHHHHHHHHHHHHHHHCCCCCCC |
| 072 | EEELRKFLEQYNNESEQMRYPQRYGFGQGHQA | -43.29 | 38.7 | HHHHHHHHHHHHHHHHHHHHHHHHHHCCCCCCC |
| 234 | EEELRKFLEQYNNEYEQEFYQQKGFQGHSA   | -43.29 | 41.9 | HHHHHHHHHHHHHHHHHHHHHHHHHHCCCCCCC |
| 951 | EEELRRFLEQLNNEEEDMRYQQQGFQGHSS   | -43.28 | 51.6 | HHHHHHHHHHHHHHHHHHHHHHHHHHCCCCCCC |
| 817 | EEELRKLEKINNEAEQRRYPQRYGFGQGHSS  | -43.22 | 41.9 | HHHHHHHHHHHHHHHHHHHHHHHHHHCCCCCCC |
| 027 | EEELRKFLDYNNRAEDMRYQRFQGFQGHSS   | -43.19 | 45.2 | HHHHHHHHHHHHHHHHHHHHHHHHHHCCCCCCC |
| 077 | EEEKRKMLEKINQEAQMRYPQYQYGFQGHSS  | -43.19 | 48.4 | HHHHHHHHHHHHHHHHHHHHHHHHHHCCCCCCC |
| 904 | EEELKKLEKINNEAEQMRYPQKEGFGQGHSS  | -43.18 | 51.6 | HHHHHHHHHHHHHHHHHHHHHHHHHHCCCCCCC |
| 483 | EEELKKLEKLNNEQEQIRYQQQGFQGHSS    | -43.18 | 48.4 | HHHHHHHHHHHHHHHHHHHHHHHHHHCCCCCCC |
| 970 | EEEWKLEKINNEEEQKRYQRYGFGQGHSS    | -43.18 | 45.2 | HHHHHHHHHHHHCHHHHHHHHHHHHHCCCCCCC |
| 667 | EEELKKFLQYNNESEDMRYQKEGFGQGHSS   | -43.17 | 58.1 | HHHHHHHHHHHHCHHHHHHHHHHHHHCCCCCCC |
| 088 | EEEEKKMLEQINNEAEQMRYPQRYGFGQGHSA | -43.14 | 41.9 | HHHHHHHHHHHHHHHHHHHHHHHHHHCCCCCCC |
| 726 | EEELRKFLEKFNNEYEQRFYQQKGFQGHSA   | -43.13 | 48.4 | HHHHHHHHHHHHHHHHHHHHHHHHHHCCCCCCC |
| 811 | EEELKKLEQINNEAEQMRYPQQGFGQGHSS   | -43.09 | 48.4 | HHHHHHHHHHHHHHHHHHHHHHHHHHCCCCCCC |
| 634 | EQELRKLEQINNEEEQMRYPQYQYGFQGHSS  | -43.09 | 38.7 | HHHHHHHHHHHHHHHHHHHHHHHHHHCCCCCCC |
| 289 | EEELKKFLEQYNNEEEQMRYPQREGFGQGHSS | -43.03 | 48.4 | HHHHHHHHHHHHCHHHHHHHHHHHHHCCCCCCC |
| 596 | EEELKKFLEQYNNESEQMRYPQRYGFGQGHSS | -43.03 | 48.4 | HHHHHHHHHHHHHHHHHHHHHHHHHHCCCCCCC |
| 078 | EEELRKFLEQFNNEYEQMFYQQKGFQGHSS   | -43.03 | 51.6 | HHHHHHHHHHHHHHHHHHHHHHHHHHCCCCCCC |
| 407 | EEELRKFLEQLNNEEEQMRYPQYQYGFQGHSS | -43.03 | 45.2 | HHHHHHHHHHHHHHHHHHHHHHHHHHCCCCCCC |
| 681 | EEELRKFLEQYNNEEEQMRYPQREGFGQGHSS | -43.03 | 45.2 | HHHHHHHHHHHHCHHHHHHHHHHHHHCCCCCCC |
| 451 | EEEWKFLQYNNEAEQMRYPQRFQGFQGHSS   | -43.03 | 48.4 | HHHHHHHHHHHHHHHHHHHHHHHHHHCCCCCCC |
| 109 | EQELRKFLQFNNEYEQMFYQQKGFQGHSS    | -43.03 | 48.4 | HHHHHHHHHHHHHHHHHHHHHHHHHHCCCCCCC |
| 281 | EEELRKILEQFNNEEEQMRYPQREGFGQGHSS | -42.97 | 45.2 | HHHHHHHHHHHHCHHHHHHHHHHHHHCCCCCCC |
| 401 | EEELKKLEKLNNEKEQRRYPQQQGFQGHSS   | -42.97 | 48.4 | HHHHHHHHHHHHHHHHHHHHHHHHHHCCCCCCC |
| 299 | EEELKKFLEQFNNEQEOMSQRHGFQGHSS    | -42.96 | 45.2 | HHHHHHHHHHHHHHHHHHHHHHHHHHCCCCCCC |
| 581 | EEQLRKLEQLNQEKEQMSYQRYGFGQGHSS   | -42.94 | 45.2 | HHHHHHHHHHHHHHHHHHHHHHHHHHCCCCCCC |
| 205 | EEEKRKFLEKYNQEAQMRYPQRYGFGQGHSS  | -42.91 | 51.6 | HHHHHHHHHHHHHHHHHHHHHHHHHHCCCCCCC |
| 098 | EEELKKFLEKFNQEEQMFYQKEGFGQGHSS   | -42.91 | 58.1 | HHHHHHHHHHHHHHHHHHHHHHHHHHCCCCCCC |
| 798 | EEELRKFLEKLNQEEQMRYPQYQYGFQGHSS  | -42.91 | 48.4 | HHHHHHHHHHHHHHHHHHHHHHHHHHCCCCCCC |
| 166 | EEQLKKFLEQYNNESEQMRYPQQQGFQGHSA  | -42.85 | 45.2 | HHHHHHHHHHHHHHHHHHHHHHHHHHCCCCCCC |
| 662 | EEELRKFLQYNQRSEQERYQQQGFQGHSS    | -42.79 | 41.9 | HHHHHHHHHHHHHHHHHHHHHHHHHHCCCCCCC |
| 585 | EEELKKFLDYNNRAEDMRYQQNGFGQGHSS   | -42.67 | 48.4 | HHHHHHHHHHHHHHHHHHHHHHHHHHCCCCCCC |
| 911 | EEELRKFLQYNNEAEQIRYQQQGFQGHSS    | -42.62 | 51.6 | HHHHHHHHHHHHHHHHHHHHHHHHHHCCCCCCC |
| 458 | EEELRKFLQYNQEEQMFYQQKGFQGHSS     | -42.60 | 48.4 | HHHHHHHHHHHHHHHHHHHHHHHHHHCCCCCCC |
| 437 | EEEEKKMLEKINQEEQMRYPQREGFGQGHSS  | -42.59 | 48.4 | HHHHHHHHHHHHHHHHHHHHHHHHHHCCCCCCC |
| 167 | EEELRKFLQFNNEYEQMFYQQKGFQGHSS    | -42.58 | 48.4 | HHHHHHHHHHHHHHHHHHHHHHHHHHCCCCCCC |
| 344 | EEEEKKMLEQFNNEYEQMYQQNGFGQGHSS   | -42.57 | 41.9 | HHHHHHHHHHHHHHHHHHHHHHHHHHCCCCCCC |
| 478 | EEELKKFLQFNNEYEQMFYQQKGFQGHSS    | -42.52 | 54.8 | HHHHHHHHHHHHHHHHHHHHHHHHHHCCCCCCC |
| 860 | EEELKKFLEQYNNEAEQMRYPQQQGFQGHSS  | -42.52 | 51.6 | HHHHHHHHHHHHHHHHHHHHHHHHHHCCCCCCC |
| 327 | EEELKKFLEQYNNEAEQMRYPQRFQGFQGHSS | -42.52 | 51.6 | HHHHHHHHHHHHHHHHHHHHHHHHHHCCCCCCC |
| 010 | EEELKKFLEQYNNESEQMRYPQQQGFQGHSS  | -42.52 | 48.4 | HHHHHHHHHHHHHHHHHHHHHHHHHHCCCCCCC |
| 435 | EEELRKFLQYNNESEQMRYPQQQGFQGHSS   | -42.52 | 45.2 | HHHHHHHHHHHHHHHHHHHHHHHHHHCCCCCCC |
| 022 | EEELRKFLQYNNEYEQEEYQKGFQGHSS     | -42.52 | 45.2 | HHHHHHHHHHHHHHHHHHHHHHHHHHCCCCCCC |
| 318 | EEEWKFLQYNNEEEQMRYPQREGFGQGHSS   | -42.52 | 45.2 | HHHHHHHHHHHHCHHHHHHHHHHHHHCCCCCCC |
| 792 | EEEWKFLQFNNEYEQMFYQQQGFQGHSS     | -42.44 | 51.6 | HHHHHHHHHHHHHHHHHHHHHHHHHHCCCCCCC |
| 169 | EEEWKFLQLNNEEEQMRYPQQQGFQGHSS    | -42.43 | 41.9 | HHHHHHHHHHHHHHHHHHHHHHHHHHCCCCCCC |
| 244 | EEEKRKMLEQINQEEQMRYPQQQGFQGHSS   | -42.42 | 41.9 | HHHHHHHHHHHHHHHHHHHHHHHHHHCCCCCCC |
| 377 | EEELKKLEQINNEQEQEEYQKGFQGHSS     | -42.42 | 45.2 | HHHHHHHHHHHHHHHHHHHHHHHHHHCCCCCCC |
| 846 | EEELKKLEQLNNEKEQMRYPQRFQGFQGHSS  | -42.42 | 45.2 | HHHHHHHHHHHHHHHHHHHHHHHHHHCCCCCCC |

|     |                                |        |      |                                         |
|-----|--------------------------------|--------|------|-----------------------------------------|
| 572 | EEEKRFLEKYNNSEQRRYQRYGFGQGDSR  | -42.40 | 48.4 | HHHHHHHHHHHHCHHHHHHHHHHHCCCCCCC         |
| 383 | EEEARKMLEQINNEEQMRYQQQGFQGGDSR | -42.13 | 45.2 | HHHHHHHHHHHHHHHHHHHHHHHHHHHHHHHHCCCCCCC |
| 258 | EEELRKFLKYNNESEQRRYQQEGFGQGDSR | -41.89 | 48.4 | HHHHHHHHHHHHHHHHHHHHHHHHHHHHHHHHCCCCCCC |
| 600 | EEELKKFLEQYNNEEQMRYQRQGFQGGDSR | -41.85 | 48.4 | HHHHHHHHHHHHCHHHHHHHHHHHCCCCCCC         |
| 019 | EEELKKFLEQYNNEYEQMYQQKGFQGGDSR | -41.85 | 48.4 | HHHHHHHHHHHHHHHHHHHHHHHHHHHHHHHHCCCCCCC |
| 756 | EEEKKMLEQYEEEEERQRYQREGFGQGHSS | -41.54 | 32.3 | HHHHHHHHHHHHHHHHHHHHHHHHHHHHHHHHCCCCCCC |
| 350 | EEEAKMLEQINNEAQMRYQRYGFGQGDSR  | -41.46 | 51.6 | HHHHHHHHHHHHHHHHHHHHHHHHHHHHHHHHCCCCCCC |
| 639 | EEEKRMLEQINNEEQMRYQREGFGQGDSR  | -41.46 | 41.9 | HHHHHHHHHHHHCHHHHHHHHHHHCCCCCCC         |
| 917 | EEEKRMLEQINNEEQERYQQQGFQGGDSR  | -41.19 | 41.9 | HHHHHHHHHHHHCHHHHHHHHHHHCCCCCCC         |
| 928 | EEELKKFLEDYNNRYEQEYQRKGFQGHSS  | -40.53 | 38.7 | HHHHHHHHHHHHHHHHHHHHHHHHHHHHHHHHCCCCCCC |

**Table S5.** Summary of 695 peptide sequences designed using EvoEF2 and the evolutionary profile (weight = 1.00).

| #label | #peptide                            | #binding (EEU) | #SeqID (%) | #Secondary structure                       |
|--------|-------------------------------------|----------------|------------|--------------------------------------------|
| WT     | EEQAKTFLDKFNHEAEDLFYQSSGLGKGDFR     | -46.46         | 100.       | HHHHHHHHHHHHHHHHHHHHHHHHHHHHHHHCCCCCCCC    |
| 322    | EEELKKILEKINQEEDDMRYQQQGFQKGGHDA    | -49.06         | 48.4       | HHHHHHHHHHHHHHHHHHHHHHHHHHHHHHHCCCCCCCC    |
| 591    | EEELKKILEKLNQEEDDMRYQREGFGKGGHSA    | -49.06         | 48.4       | HHHHHHHHHHHHHHHHHHHHHHHHHHHHHHHCCCCCCCC    |
| 276    | EEEWKILEKLNQEEDDIKYQQNGFGKGGHDA     | -49.06         | 45.2       | HHHHHHHHHHHHHHHHHHHHHHHHHHHHHHHCCCCCCCC    |
| 783    | EEELKKLLDQLNQEEDDMRYQQNGFGKGGHDA    | -49.05         | 48.4       | HHHHHHHHHHHHHHHHHHHHHHHHHHHHHHHCCCCCCCC    |
| 773    | EEELKKILEKINNEEEDIRYQQQGFQKGGHDA    | -48.77         | 48.4       | HHHHHHHHHHHHHHHHHHHHHHHHHHHHHHHCCCCCCCC    |
| 255    | EEELRKILEKLNNEQEDDMRYQQNGFGKGGHDA   | -48.77         | 45.2       | HHHHHHHHHHHHHHHHHHHHHHHHHHHHHHHCCCCCCCC    |
| 199    | EEEWKILEKLNNEEEDMKYQKEGFGKGGHDA     | -48.77         | 45.2       | HHHHHHHHHHHHHHHHHHHHHHHHHHHHHHHCCCCCCCC    |
| 604    | EEELRKILEKLNNEQEDDMRYQRYGFGKGGHDA   | -48.53         | 45.2       | HHHHHHHHHHHHHHHHHHHHHHHHHHHHHHHCCCCCCCC    |
| 895    | EEELKKLLDQINNEEEDDMRYQQQGFQKGGHDA   | -48.23         | 48.4       | HHHHHHHHHHHHHHHHHHHHHHHHHHHHHHHCCCCCCCC    |
| 237    | EEEARKFLDQFNNEYEDMFYQQKGFQKGGHDA    | -48.19         | 58.1       | HHHHHHHHHHHHHHHHHHHHHHHHHHHHHHHCCCCCCCC    |
| 615    | EEELKKLLEKLNQEEDDIKYQQNGFGKGGHDA    | -48.05         | 48.4       | HHHHHHHHHHHHHHHHHHHHHHHHHHHHHHHCCCCCCCC    |
| 703    | EEELKKLLEKLNQEEDDMTYQRHGFGKGGHDA    | -48.05         | 48.4       | HHHHHHHHHHHHHHHHHHHHHHHHHHHHHHHCCCCCCCC    |
| 900    | EEELRKLEKINQEADIRYQQNGFGKGGHDA      | -48.05         | 48.4       | HHHHHHHHHHHHHHHHHHHHHHHHHHHHHHHCCCCCCCC    |
| 758    | EEELRKLEKLNQEEDDMRYQKEGFGKGGHDA     | -48.05         | 45.2       | HHHHHHHHHHHHHHHHHHHHHHHHHHHHHHHCCCCCCCC    |
| 496    | EEELKKILEQLNNEEKDMSFQQQGFQKGGHDA    | -48.00         | 41.9       | HHHHHHHHHHHHHHHHHHHHHHHHHHHHHHHCCCCCCCC    |
| 651    | EEELKKLLEKINNEEEDIRFQQQGFQKGGHDA    | -47.99         | 45.2       | HHHHHHHHHHHHHHHHHHHHHHHHHHHHHHHCCCCCCCC    |
| 355    | EEELRKLEKLNNEQEDIRYQQQGFQKGGHDA     | -47.94         | 45.2       | HHHHHHHHHHHHHHHHHHHHHHHHHHHHHHHCCCCCCCC    |
| 638    | EEELKKFLFLEQYNNEAEDDMRYQRQGFQKGGHDA | -47.92         | 51.6       | HHHHHHHHHHHHHHHHHHHHHHHHHHHHHHHCCCCCCCC    |
| 806    | EEELRKLEKINNEEEDITYQQNGFGKGGHDA     | -47.91         | 41.9       | HHHHHHHHHHHHHHHHHHHHHHHHHHHHHHHCCCCCCCC    |
| 936    | EEELRKLEKLNQEEDIRYQQNGFGKGGHDA      | -47.81         | 45.2       | HHHHHHHHHHHHHHHHHHHHHHHHHHHHHHHCCCCCCCC    |
| 091    | EEELKKLLEKINNEAEDDMRYQQQGFQKGGHDA   | -47.77         | 51.6       | HHHHHHHHHHHHHHHHHHHHHHHHHHHHHHHCCCCCCCC    |
| 263    | EEELKKILEQINNEAEDDMRYQQQGFQKGGHDF   | -47.77         | 48.4       | HHHHHHHHHHHHHHHHHHHHHHHHHHHHHHHCCCCCCCC    |
| 075    | EEELKKILEQINNEEEDDMRYQQQGFQKGGHDA   | -47.77         | 45.2       | HHHHHHHHHHHHHHHHHHHHHHHHHHHHHHHCCCCCCCC    |
| 934    | EEELKKILEQINNEEEDDMRYQQYGFQKGGHDA   | -47.77         | 45.2       | HHHHHHHHHHHHHHHHHHHHHHHHHHHHHHHCCCCCCCC    |
| 415    | EEELKKILEQLNNEEEDDMRYQQNGFGKGGHDA   | -47.77         | 45.2       | HHHHHHHHHHHHHHHHHHHHHHHHHHHHHHHCCCCCCCC    |
| 512    | EEELKKILEQLNNEQEDDMRYQQQGFQKGGHDA   | -47.77         | 45.2       | HHHHHHHHHHHHHHHHHHHHHHHHHHHHHHHCCCCCCCC    |
| 623    | EEELKKILEQLNNEQEDDMRYQRYGFGKGGHDA   | -47.77         | 45.2       | HHHHHHHHHHHHHHHHHHHHHHHHHHHHHHHCCCCCCCC    |
| 316    | EEELRKILEQINNEEEDDMRYQQYGFQKGGHDA   | -47.77         | 41.9       | HHHHHHHHHHHHHHHHHHHHHHHHHHHHHHHCCCCCCCC    |
| 886    | EEELRKILEQLNNEQEDDMRYQQQGFQKGGHDA   | -47.77         | 41.9       | HHHHHHHHHHHHHHHHHHHHHHHHHHHHHHHCCCCCCCC    |
| 239    | EEELKKLLEKINNEAEDIRYQQNGFGKGGHDA    | -47.75         | 51.6       | HHHHHHHHHHHHHHHHHHHHHHHHHHHHHHHCCCCCCCC    |
| 910    | EEELKKLLEKINNEEEDIRYQQQGFQKGGHDA    | -47.75         | 48.4       | HHHHHHHHHHHHHHHHHHHHHHHHHHHHHHHCCCCCCCC    |
| 413    | EEELKKLLEKINNEEEDIRYQQQGFQKGGHSA    | -47.75         | 48.4       | HHHHHHHHHHHHHHHHHHHHHHHHHHHHHHHCCCCCCCC    |
| 720    | EEELKKLLEKINNEEEDDMRYQQYGFQKGGHDA   | -47.75         | 48.4       | HHHHHHHHHHHHHHHHHHHHHHHHHHHHHHHCCCCCCCC    |
| 999    | EEELKKLLEKINNEEEDDMRYQREGFGKGGHDA   | -47.75         | 48.4       | HHHHHHHHHHHHHHHHHHHHHHHHHHHHHHHCCCCCCCC    |
| 526    | EEELKKLLEKLNNEEKDMSYQQQGFQKGGHDA    | -47.75         | 48.4       | HHHHHHHHHHHHHHHHHHHHHHHHHHHHHHHCCCCCCCC    |
| 733    | EEELKKLLEKLNNEQEDIRYQQNGFGKGGHDA    | -47.75         | 48.4       | HHHHHHHHHHHHHHHHHHHHHHHHHHHHHHHCCCCCCCC    |
| 979    | EEELKKLLEKLNNEQEDDMRYQQQGFQKGGHDA   | -47.75         | 48.4       | HHHHHHHHHHHHHHHHHHHHHHHHHHHHHHHCCCCCCCC    |
| 363    | EEELRKLLEKINNEAEDIRYQQNGFGKGGHDA    | -47.75         | 48.4       | HHHHHHHHHHHHHHHHHHHHHHHHHHHHHHHCCCCCCCC    |
| 045    | EEELRKLLEKINNEAEDIRYQQNGFGKGGHSA    | -47.75         | 48.4       | HHHHHHHHHHHHHHHHHHHHHHHHHHHHHHHCCCCCCCC    |
| 849    | EEELRKLLEKINNEAEDDMRYQQQGFQKGGHDA   | -47.75         | 48.4       | HHHHHHHHHHHHHHHHHHHHHHHHHHHHHHHCCCCCCCC    |
| 819    | EEELRKLLEKINNEAEDDMRYQRQGFQKGGHDA   | -47.75         | 48.4       | HHHHHHHHHHHHHHHHHHHHHHHHHHHHHHHCCCCCCCC    |
| 361    | EEELRKLLEKINNEEEDIRYQQQGFQKGGHDA    | -47.75         | 45.2       | HHHHHHHHHHHHHHHHHHHHHHHHHHHHHHHCCCCCCCC    |
| 454    | EEELRKLLEKINNEEEDIRYQQQGFQKGGHSA    | -47.75         | 45.2       | HHHHHHHHHHHHHHHHHHHHHHHHHHHHHHHCCCCCCCC    |
| 275    | EEELRKLLEKINNEEEDDMRYQQYGFQKGGHDA   | -47.75         | 45.2       | HHHHHHHHHHHHHHHHHHHHHHHHHHHHHHHCCCCCCCC    |
| 326    | EEELRKLLEKLNNEEKDMSYQQQGFQKGGHDA    | -47.75         | 45.2       | HHHHHHHHHHHHHHHHHHHHHHHHHHHHHHHCCCCCCCC    |
| 285    | EEELRKLLEKLNNEEKDMSYQQQGFQKGGHDA    | -47.75         | 45.2       | HHHHHHHHHHHHHHHHHHHHHHHHHHHHHHHCCCCCCCC    |
| 107    | EEELRKLLEKLNNEQEDIRYQQNGFGKGGHDA    | -47.75         | 45.2       | HHHHHHHHHHHHHHHHHHHHHHHHHHHHHHHCCCCCCCC    |
| 510    | EEELRKLLEKLNNEQEDDMRYQQNGFGKGGHDA   | -47.75         | 45.2       | HHHHHHHHHHHHHHHHHHHHHHHHHHHHHHHCCCCCCCC    |
| 567    | EEELRKLLEKLNNEQEDDMRYQRQGFQKGGHDA   | -47.75         | 45.2       | HHHHHHHHHHHHHHHHHHHHHHHHHHHHHHHCCCCCCCC    |
| 469    | EEEWKLMMEKYNNEEEDDMRYQREGFGKGGHDA   | -47.75         | 45.2       | HHHHHHHHHHHCCSHHHHHHHHHHHHHHHHHHHHCCCCCCCC |
| 582    | EQELRKLLEKLNNEQEDIRYQQNGFGKGGHDA    | -47.75         | 41.9       | HHHHHHHHHHHHHHHHHHHHHHHHHHHHHHHCCCCCCCC    |
| 959    | EEEARKFLEKYNQEEDDMRYQQQGFQKGGHSA    | -47.67         | 51.6       | HHHHHHHHHHHHHHHHHHHHHHHHHHHHHHHCCCCCCCC    |
| 833    | EEELRKILEQLNNEQEDDMRYQQQGFQKGGHDA   | -47.53         | 41.9       | HHHHHHHHHHHHHHHHHHHHHHHHHHHHHHHCCCCCCCC    |
| 788    | EEEARKFLEKYNQEEDDMRYQREGFGKGGHSA    | -47.49         | 51.6       | HHHHHHHHHHHHHHHHHHHHHHHHHHHHHHHCCCCCCCC    |
| 228    | EEEARKFLEKFNQEEDDMRYQRQGFQKGGHDA    | -47.48         | 54.8       | HHHHHHHHHHHHHHHHHHHHHHHHHHHHHHHCCCCCCCC    |
| 042    | EEEARKFLEKYNQEADIRYQQNGFGKGGHDA     | -47.48         | 54.8       | HHHHHHHHHHHHHHHHHHHHHHHHHHHHHHHCCCCCCCC    |
| 694    | EEEARKFLEKYNQEADIRYQQNGFGKGGHDA     | -47.48         | 54.8       | HHHHHHHHHHHHHHHHHHHHHHHHHHHHHHHCCCCCCCC    |
| 301    | EEEARKFLEKYNQEADDMRYQQQGFQKGGHDA    | -47.48         | 54.8       | HHHHHHHHHHHHHHHHHHHHHHHHHHHHHHHCCCCCCCC    |
| 486    | EEEARKFLEKYNQEEDDMRYQQQGFQKGGHDA    | -47.48         | 51.6       | HHHHHHHHHHHHHHHHHHHHHHHHHHHHHHHCCCCCCCC    |
| 006    | EEEARKFLEKYNQEEDDMRYQREGFGKGGHDA    | -47.48         | 51.6       | HHHHHHHHHHHHHHHHHHHHHHHHHHHHHHHCCCCCCCC    |
| 547    | EEEARKFLEKYNQESDIRYQQNGFGKGGHDA     | -47.48         | 51.6       | HHHHHHHHHHHHHHHHHHHHHHHHHHHHHHHCCCCCCCC    |
| 101    | EEEARKFLEKYNQESDIRYQQQGFQKGGHDA     | -47.48         | 51.6       | HHHHHHHHHHHHHHHHHHHHHHHHHHHHHHHCCCCCCCC    |
| 504    | EEEARKFLEKYNQESDMRYQQQGFQKGGHDA     | -47.48         | 51.6       | HHHHHHHHHHHHHHHHHHHHHHHHHHHHHHHCCCCCCCC    |

|     |                                 |        |      |                                |
|-----|---------------------------------|--------|------|--------------------------------|
| 712 | EEEARKFLEKYNQSEEDMRYQRYGFGKGHDA | -47.48 | 51.6 | HHHHHHHHHHHHHHHHHHHHHHCCCCCCC  |
| 995 | EEELKKFLEKFNQYEDMFYQQKGFKGHDA   | -47.48 | 58.1 | HHHHHHHHHHHHHHHHHHHHHHCCCCCCC  |
| 704 | EEELKKFLEKLNQEEEDIRYQQQGFKGHDA  | -47.48 | 51.6 | HHHHHHHHHHHHHHHHHHHHHHCCCCCCC  |
| 551 | EEELKKFLEKYNQEAEDIYYQNGFGKGHDA  | -47.48 | 54.8 | HHHHHHHHHHHHHHHHHHHHHHCCCCCCC  |
| 865 | EEELKKFLEKYNQEEEDMRYQQGFGKGHDA  | -47.48 | 51.6 | HHHHHHHHHHHHHHHHHHHHHHCCCCCCC  |
| 648 | EEELKKFLEKYNQSEEDIRYQQNGFGKGHDA | -47.48 | 51.6 | HHHHHHHHHHHHHHHHHHHHHHCCCCCCC  |
| 259 | EEELRKLLEKINQEEEDMRYQQYGFKGHDA  | -47.45 | 45.2 | HHHHHHHHHHHHHHHHHHHHHHCCCCCCC  |
| 874 | EEEAKKFFLEKYNQEEEDMYQQKGFKGHDA  | -47.43 | 54.8 | HHHHHHHHHHHHHHHHHHHHHHCCCCCCC  |
| 687 | EEEARKFLEKYNNEAEDIRFQQNGFGKSA   | -47.42 | 51.6 | HHHHHHHHHHHHHHHHHHHHHHCCCCCCC  |
| 291 | EEELKKFLEKYNNEAEDIYFQQNGFGKGKDA | -47.42 | 51.6 | HHHHHHHHHHHHHHHHHHHHHHCCCCCCC  |
| 965 | EEELKKFLEKYNNESEDMRFQQGFKGKDA   | -47.42 | 48.4 | HHHHHHHHHHHHHHHHHHHHHHCCCCCCC  |
| 553 | EEELKKFLEKLNNEEDMRYQQQGFKGHDA   | -47.37 | 51.6 | HHHHHHHHHHHHHHHHHHHHHHCCCCCCC  |
| 216 | EEELKKFLEKYNNESEDIRYQQNGFGKGHDA | -47.37 | 51.6 | HHHHHHHHHHHCHHHHHHHHHHHCCCCCCC |
| 057 | EEELRKLLEQINNEAEDRTFQQNGFGKGKDA | -47.33 | 41.9 | HHHHHHHHHHHHHHHHHHHHHHCCCCCCC  |
| 323 | EEELKKLLEQINQEEEDMRYQQQGFKGHDA  | -47.30 | 45.2 | HHHHHHHHHHHHHHHHHHHHHHCCCCCCC  |
| 164 | EEELKKLLEQINQEAEDMRYQQQGFKGHDA  | -47.28 | 48.4 | HHHHHHHHHHHHHHHHHHHHHHCCCCCCC  |
| 892 | EEELKKLLEQINQEEEDMRYQREGFGKGHDA | -47.28 | 45.2 | HHHHHHHHHHHHHHHHHHHHHHCCCCCCC  |
| 552 | EEELKKLLEQLNQEEDRRYQQNGFGKGHDA  | -47.28 | 45.2 | HHHHHHHHHHHHHHHHHHHHHHCCCCCCC  |
| 675 | EEELKKLLEQLNQEEDMRYQQQGFKGHDA   | -47.28 | 45.2 | HHHHHHHHHHHHHHHHHHHHHHCCCCCCC  |
| 668 | EEELKKLLEQLNQEEDMRYQQNGFGKGHDA  | -47.28 | 45.2 | HHHHHHHHHHHHHHHHHHHHHHCCCCCCC  |
| 158 | EEELKKLLEQLNQEEDMRYQROGFKGHDA   | -47.28 | 45.2 | HHHHHHHHHHHHHHHHHHHHHHCCCCCCC  |
| 197 | EEELRKLLEQINQEAEDIRYQQNGFGKGHDA | -47.28 | 45.2 | HHHHHHHHHHHHHHHHHHHHHHCCCCCCC  |
| 559 | EEELRKLLEQINQEEEDMFYQQKGFKGHSA  | -47.28 | 45.2 | HHHHHHHHHHHHHHHHHHHHHHCCCCCCC  |
| 973 | EEELRKLLEQINQEEEDMRYQQQGFKGHDA  | -47.28 | 41.9 | HHHHHHHHHHHHHHHHHHHHHHCCCCCCC  |
| 889 | EEELRKLLEQINQEEEDMRYQREGFGKGHDA | -47.28 | 41.9 | HHHHHHHHHHHHHHHHHHHHHHCCCCCCC  |
| 795 | EEELRKLLEQINQEEEDMRYQRYGFGKGHDA | -47.28 | 41.9 | HHHHHHHHHHHHHHHHHHHHHHCCCCCCC  |
| 459 | EEELRKLLEQLNQEEDMSYQQGFKGHDA    | -47.28 | 41.9 | HHHHHHHHHHHHHHHHHHHHHHCCCCCCC  |
| 610 | EEELRKLLEQLNQEEDMRYQQNGFGKGHDA  | -47.28 | 41.9 | HHHHHHHHHHHHHHHHHHHHHHCCCCCCC  |
| 398 | EQELRKLLEQINQEEEDMRYQQQGFKGHDA  | -47.28 | 38.7 | HHHHHHHHHHHHHHHHHHHHHHCCCCCCC  |
| 458 | EEELRKILEQFNNEEDMYQQYGFKGHDA    | -47.25 | 45.2 | HHHHHHHHHHHHHHHHHHHHHHCCCCCCC  |
| 426 | EEELKKLLEQINNEAEDMRFOKEGFGKGKDA | -47.22 | 45.2 | HHHHHHHHHHHHHHHHHHHHHHCCCCCCC  |
| 605 | EEELRKLLEQINNEEDMRFQQGFKGKDA    | -47.22 | 38.7 | HHHHHHHHHHHHHHHHHHHHHHCCCCCCC  |
| 757 | EEELRKLLEQLNNEQEDMRFQQGFKGKDA   | -47.22 | 38.7 | HHHHHHHHHHHHHHHHHHHHHHCCCCCCC  |
| 393 | EEELKKLLEKINNEEDIRYQQQGFKGDSR   | -47.20 | 54.8 | HHHHHHHHHHHHHHHHHHHHHHCCCCCCC  |
| 794 | EEELKKLLEKLNNEQEDIRYQQNGFGKDSR  | -47.20 | 54.8 | HHHHHHHHHHHHHHHHHHHHHHCCCCCCC  |
| 626 | EEELRKILEQYNNEEDMRYQREGFGKGHDA  | -47.20 | 41.9 | HHHHHHHHHHHCHHHHHHHHHHHCCCCCCC |
| 825 | EEEWKFFLEKLNNEAEDMQYQRAFFGKGHDA | -47.19 | 54.8 | HHHHHHHHHHHHHHHHHHHHHHCCCCCCC  |
| 520 | EEEARKFLEKFNNEAEDMQYQRAFFGKGHDA | -47.19 | 58.1 | HHHHHHHHHHHHHHHHHHHHHHCCCCCCC  |
| 894 | EEEARKFLEKFNNEEDMSYQQGFKGHDA    | -47.19 | 54.8 | HHHHHHHHHHHHHHHHHHHHHHCCCCCCC  |
| 441 | EEEARKFLEKFNNEYEDMFYQQKGFKGHDA  | -47.19 | 58.1 | HHHHHHHHHHHHHHHHHHHHHHCCCCCCC  |
| 971 | EEEARKFLEKFNNEYEDMFYQQQGFKGHDA  | -47.19 | 58.1 | HHHHHHHHHHHHHHHHHHHHHHCCCCCCC  |
| 240 | EEEARKFLEKLNNEEDIRYQQQGFKGHDA   | -47.19 | 51.6 | HHHHHHHHHHHHHHHHHHHHHHCCCCCCC  |
| 770 | EEEARKFLEKLNNEEDMRYQQQGFKGHDA   | -47.19 | 51.6 | HHHHHHHHHHHHHHHHHHHHHHCCCCCCC  |
| 400 | EEEARKFLEKYNNEAEDIRYQQGFKGHDA   | -47.19 | 54.8 | HHHHHHHHHHHHHHHHHHHHHHCCCCCCC  |
| 753 | EEEARKFLEKYNNEAEDIRYQQGFKGHDA   | -47.19 | 54.8 | HHHHHHHHHHHHHHHHHHHHHHCCCCCCC  |
| 406 | EEEARKFLEKYNNEAEDIYYQNGFGKGHDA  | -47.19 | 54.8 | HHHHHHHHHHHHHHHHHHHHHHCCCCCCC  |
| 994 | EEEARKFLEKYNNEAEDMRYQQQGFKGHDA  | -47.19 | 54.8 | HHHHHHHHHHHHHHHHHHHHHHCCCCCCC  |
| 569 | EEEARKFLEKYNNESEDIRYQQGFKGHDA   | -47.19 | 51.6 | HHHHHHHHHHHCHHHHHHHHHHHCCCCCCC |
| 683 | EEEARKFLEKYNNESEDIRYQQGFKGHDA   | -47.19 | 51.6 | HHHHHHHHHHHCHHHHHHHHHHHCCCCCCC |
| 131 | EEEARKFLEKYNNESEDIRYQQGFKGHSA   | -47.19 | 51.6 | HHHHHHHHHHHCHHHHHHHHHHHCCCCCCC |
| 980 | EEELKKFLEKFNNEYEDIYFQQKGFKGHDA  | -47.19 | 58.1 | HHHHHHHHHHHHHHHHHHHHHHCCCCCCC  |
| 546 | EEELKKFLEKFNNEYEDIYFQQGFKGHDA   | -47.19 | 58.1 | HHHHHHHHHHHHHHHHHHHHHHCCCCCCC  |
| 089 | EEELKKFLEKFNNEYEDMFYQQKGFKGHDA  | -47.19 | 58.1 | HHHHHHHHHHHHHHHHHHHHHHCCCCCCC  |
| 620 | EEELKKFLEKFNNEYEDMFYQQKGFKGHSA  | -47.19 | 58.1 | HHHHHHHHHHHHHHHHHHHHHHCCCCCCC  |
| 126 | EEELKKFLEKLNNEEDMRYQREGFGKGHDA  | -47.19 | 51.6 | HHHHHHHHHHHHHHHHHHHHHHCCCCCCC  |
| 207 | EEELKKFLEKYNNEAEDIRYQQNGFGKGHDA | -47.19 | 54.8 | HHHHHHHHHHHHHHHHHHHHHHCCCCCCC  |
| 144 | EEELKKFLEKYNNEAEDIRYQQGFKGHDA   | -47.19 | 54.8 | HHHHHHHHHHHHHHHHHHHHHHCCCCCCC  |
| 961 | EEELKKFLEKYNNEAEDIYYQNGFGKGHDA  | -47.19 | 54.8 | HHHHHHHHHHHHHHHHHHHHHHCCCCCCC  |
| 976 | EEELKKFLEKYNNEAEDIYYQNGFGKGHSA  | -47.19 | 54.8 | HHHHHHHHHHHHHHHHHHHHHHCCCCCCC  |
| 409 | EEELKKFLEKYNNEAEDMRYQQGFKGHDA   | -47.19 | 54.8 | HHHHHHHHHHHHHHHHHHHHHHCCCCCCC  |
| 008 | EEELKKFLEKYNNEEDMRYQREGFGKGHDA  | -47.19 | 51.6 | HHHHHHHHHHHCHHHHHHHHHHHCCCCCCC |
| 984 | EEELKKFLEKYNNEEDMSYQRYGFGKGHDA  | -47.19 | 51.6 | HHHHHHHHHHHHHHHHHHHHHHCCCCCCC  |
| 090 | EEELKKFLEKYNNESEDIRYQQGFKGHDF   | -47.19 | 51.6 | HHHHHHHHHHHCHHHHHHHHHHHCCCCCCC |
| 442 | EEELKKFLEKYNNESEDIRYQQGFKGHDA   | -47.19 | 51.6 | HHHHHHHHHHHCHHHHHHHHHHHCCCCCCC |
| 803 | EEELKKFLEKYNNEYEDIYFQQKGFKGHDA  | -47.19 | 54.8 | HHHHHHHHHHHHHHHHHHHHHHCCCCCCC  |
| 310 | EEELKKFLEKYNNEYEDMEYQRNGRKGHDY  | -47.19 | 51.6 | HHHHHHHHHHHHHHHHHHHHHHCCCCCCC  |
| 784 | EEELKKFLEKYNNEYEDMFYQQKGFKGHDA  | -47.19 | 54.8 | HHHHHHHHHHHHHHHHHHHHHHCCCCCCC  |

|     |                                  |        |      |                                     |
|-----|----------------------------------|--------|------|-------------------------------------|
| 129 | EEWKKFLEKYNNEAEDIYYQQNGFGKGHDA   | -47.19 | 51.6 | HHHHHHHHHHHHHHHHHHHHHHHHHHHCCCCCCCC |
| 117 | EQEARKFLEKYNNESEDIRYQQGGFGKGHDF  | -47.19 | 48.4 | HHHHHHHHHHHHHHHHHHHHHHHHHHHCCCCCCCC |
| 989 | EEEARKFLEKFNQYEYDMFYQQKGFKGHDA   | -47.16 | 58.1 | HHHHHHHHHHHHHHHHHHHHHHHHHHHCCCCCCCC |
| 755 | EEELKKLLEKLNQEEDMYQQKGFKGHDA     | -47.15 | 54.8 | HHHHHHHHHHHHHHHHHHHHHHHHHHHCCCCCCCC |
| 283 | EEELKKLLEQINQEAEDMRYQQNGFGKGHDA  | -47.04 | 48.4 | HHHHHHHHHHHHHHHHHHHHHHHHHHHCCCCCCCC |
| 587 | EEEARKFLEKYNQEAQIRYQQGGFGRGHDA   | -47.03 | 48.4 | HHHHHHHHHHHHHHHHHHHHHHHHHHHCCCCCCCC |
| 289 | EEELKKLLEQINNEEDMRYQQGGFGKGHDA   | -47.00 | 45.2 | HHHHHHHHHHHHHHHHHHHHHHHHHHHCCCCCCCC |
| 431 | EEELKKLLEQINNEEDMRYQREGFGKGHDA   | -47.00 | 45.2 | HHHHHHHHHHHHHHHHHHHHHHHHHHHCCCCCCCC |
| 530 | EEELRKLLEQINNEKEDMEYQRAGFGKGHDA  | -47.00 | 41.9 | HHHHHHHHHHHHHHHHHHHHHHHHHHHCCCCCCCC |
| 066 | EEELKKFLEKYNQEAENIYKQQNGFGSGKDA  | -46.99 | 45.2 | HHHHHHHHHHHHHHHHHHHHHHHHHHHCCCCCCCC |
| 108 | EEELKKLLEQINNEAEDIRYQQNGFGKGHDA  | -46.99 | 48.4 | HHHHHHHHHHHHHHHHHHHHHHHHHHHCCCCCCCC |
| 109 | EEELKKLLEQINNEAEDIRYQQNGFGKGHSA  | -46.99 | 48.4 | HHHHHHHHHHHHHHHHHHHHHHHHHHHCCCCCCCC |
| 529 | EEELKKLLEQINNEAEDMRYQQNGFGKGHDA  | -46.99 | 48.4 | HHHHHHHHHHHHHHHHHHHHHHHHHHHCCCCCCCC |
| 831 | EEELKKLLEQINNEAEDMRYQQGGFGKGHDA  | -46.99 | 48.4 | HHHHHHHHHHHHHHHHHHHHHHHHHHHCCCCCCCC |
| 843 | EEELKKLLEQINNEEDMRYQQGGFGKGHSA   | -46.99 | 45.2 | HHHHHHHHHHHHHHHHHHHHHHHHHHHCCCCCCCC |
| 058 | EEELKKLLEQINNEEDMRYQQYGFKGHDA    | -46.99 | 45.2 | HHHHHHHHHHHHHHHHHHHHHHHHHHHCCCCCCCC |
| 014 | EEELKKLLEQINNEKEDMEYQRAGFGKGHDA  | -46.99 | 45.2 | HHHHHHHHHHHHHHHHHHHHHHHHHHHCCCCCCCC |
| 966 | EEELKKLLEQLNNEEDKQYQRAGFGKGHDA   | -46.99 | 45.2 | HHHHHHHHHHHHHHHHHHHHHHHHHHHCCCCCCCC |
| 223 | EEELKKLLEQLNNEEDMKYQQNGFGKGHDA   | -46.99 | 45.2 | HHHHHHHHHHHHHHHHHHHHHHHHHHHCCCCCCCC |
| 281 | EEELKKLLEQLNNEEDRRYQQGGFGKGHDA   | -46.99 | 45.2 | HHHHHHHHHHHHHHHHHHHHHHHHHHHCCCCCCCC |
| 438 | EEELKKLLEQLNNEKEDMRYQQGGFGKGHDA  | -46.99 | 45.2 | HHHHHHHHHHHHHHHHHHHHHHHHHHHCCCCCCCC |
| 991 | EEELKKLLEQLNNEKEDMSYQQGGFGKGHDA  | -46.99 | 45.2 | HHHHHHHHHHHHHHHHHHHHHHHHHHHCCCCCCCC |
| 226 | EEELKKLLEQLNNEQEDIRYQQGGFGKGHDF  | -46.99 | 45.2 | HHHHHHHHHHHHHHHHHHHHHHHHHHHCCCCCCCC |
| 955 | EEELKKLLEQLNNEQEDMRYQQNGFGKGHDA  | -46.99 | 45.2 | HHHHHHHHHHHHHHHHHHHHHHHHHHHCCCCCCCC |
| 192 | EEELKKLLEQLNNEEDMRYQQGGFGKGHDA   | -46.99 | 45.2 | HHHHHHHHHHHHHHHHHHHHHHHHHHHCCCCCCCC |
| 368 | EEELKKLLEQLNNEQEDMRYQRGGFGKGHDA  | -46.99 | 45.2 | HHHHHHHHHHHHHHHHHHHHHHHHHHHCCCCCCCC |
| 815 | EEELRKLLEQINNEAEDMRYQRAGFGKGHDA  | -46.99 | 45.2 | HHHHHHHHHHHHHHHHHHHHHHHHHHHCCCCCCCC |
| 203 | EEELRKLLEQINNEAEDMRYQQNGFGKGHDA  | -46.99 | 45.2 | HHHHHHHHHHHHHHHHHHHHHHHHHHHCCCCCCCC |
| 210 | EEELRKLLEQINNEAEDMSYQKEGFGKGHDA  | -46.99 | 45.2 | HHHHHHHHHHHHHHHHHHHHHHHHHHHCCCCCCCC |
| 187 | EEELRKLLEQINNEEDMRYQQGGFGKGHDA   | -46.99 | 41.9 | HHHHHHHHHHHHHHHHHHHHHHHHHHHCCCCCCCC |
| 399 | EEELRKLLEQINNEEDMRYQQYGFKGHDA    | -46.99 | 41.9 | HHHHHHHHHHHHHHHHHHHHHHHHHHHCCCCCCCC |
| 201 | EEELRKLLEQINNEEDMRYQREGFGKGHDA   | -46.99 | 41.9 | HHHHHHHHHHHHHHHHHHHHHHHHHHHCCCCCCCC |
| 484 | EEELRKLLEQINNEKEDMEYQRAGFGKGHSA  | -46.99 | 41.9 | HHHHHHHHHHHHHHHHHHHHHHHHHHHCCCCCCCC |
| 295 | EEELRKLLEQLNNEEDMKYQKEGFGKGHDA   | -46.99 | 41.9 | HHHHHHHHHHHHHHHHHHHHHHHHHHHCCCCCCCC |
| 649 | EEELRKLLEQLNNEEDMKYQQNGFGKGHDA   | -46.99 | 41.9 | HHHHHHHHHHHHHHHHHHHHHHHHHHHCCCCCCCC |
| 483 | EEELRKLLEQLNNEEDMRYQQNGFGKGHDA   | -46.99 | 41.9 | HHHHHHHHHHHHHHHHHHHHHHHHHHHCCCCCCCC |
| 159 | EEELRKLLEQLNNEKEDMSYQQGGFGKGHDA  | -46.99 | 41.9 | HHHHHHHHHHHHHHHHHHHHHHHHHHHCCCCCCCC |
| 983 | EEELRKLLEQLNNEQEDMRYQQNGFGKGHDA  | -46.99 | 41.9 | HHHHHHHHHHHHHHHHHHHHHHHHHHHCCCCCCCC |
| 196 | EEELRKLLEQLNNEQEDMRYQQGGFGKGHDA  | -46.99 | 41.9 | HHHHHHHHHHHHHHHHHHHHHHHHHHHCCCCCCCC |
| 284 | EEELRKLLEQLNNEQEDMRYQRYGFKGHDA   | -46.99 | 41.9 | HHHHHHHHHHHHHHHHHHHHHHHHHHHCCCCCCCC |
| 402 | EEELKFFLEKFNNEYEDMYQQGGFGKGHDA   | -46.95 | 54.8 | HHHHHHHHHHHHHHHHHHHHHHHHHHHCCCCCCCC |
| 044 | EEELKFFLEQYNQEAEDMRFQQGGFGKGKDA  | -46.95 | 48.4 | HHHHHHHHHHHHHHHHHHHHHHHHHHHCCCCCCCC |
| 902 | EEELKFFLEKLNQEEDMRYQQYGFKGHDA    | -46.89 | 51.6 | HHHHHHHHHHHHHHHHHHHHHHHHHHHCCCCCCCC |
| 848 | EEEARKFLEKYNNEAEQIYYQQNGFGRGHDA  | -46.83 | 48.4 | HHHHHHHHHHHHHHHHHHHHHHHHHHHCCCCCCCC |
| 723 | EEELKKLLDKINNEEQDIRYQQGGFGGHDA   | -46.80 | 45.2 | HHHHHHHHHHHHHHHHHHHHHHHHHHHCCCCCCCC |
| 065 | EEELKKLLEKINQEAEQIRYQQGGFGGDSR   | -46.80 | 58.1 | HHHHHHHHHHHHHHHHHHHHHHHHHHHCCCCCCCC |
| 561 | EEELRKLLEKINQEEDIRYQQGGFGGDSR    | -46.80 | 51.6 | HHHHHHHHHHHHHHHHHHHHHHHHHHHCCCCCCCC |
| 329 | EEEARKFLEKFNQYEYDMFYQQKGFKGDSR   | -46.75 | 64.5 | HHHHHHHHHHHHHHHHHHHHHHHHHHHCCCCCCCC |
| 796 | EEEARKFLEKYNQEAEDMRYQRGGFGGDSR   | -46.75 | 61.3 | HHHHHHHHHHHHHHHHHHHHHHHHHHHCCCCCCCC |
| 935 | EEELKKFLEKYNQEAEDIRYQQNGFGGDSR   | -46.75 | 61.3 | HHHHHHHHHHHHHHHHHHHHHHHHHHHCCCCCCCC |
| 296 | EEEAFFLEQYNQYEYDMFYQQKGFKGHDA    | -46.72 | 54.8 | HHHHHHHHHHHHHHHHHHHHHHHHHHHCCCCCCCC |
| 088 | EEEARKFLEQFNQYEYDMFYQQKGFKGHDA   | -46.72 | 54.8 | HHHHHHHHHHHHHHHHHHHHHHHHHHHCCCCCCCC |
| 855 | EEEARKFLEQFNQYEYDMFYQQKGFKGHSA   | -46.72 | 54.8 | HHHHHHHHHHHHHHHHHHHHHHHHHHHCCCCCCCC |
| 920 | EEEARKFLEQFNQYEYDMFYQQGGFGKGHDA  | -46.72 | 51.6 | HHHHHHHHHHHHHHHHHHHHHHHHHHHCCCCCCCC |
| 969 | EEEARKFLEQLNQEEDMRYQQGGFGKGHSA   | -46.72 | 48.4 | HHHHHHHHHHHHHHHHHHHHHHHHHHHCCCCCCCC |
| 506 | EEEARKFLEQLNQEEDMRYQQYGFKGHDA    | -46.72 | 48.4 | HHHHHHHHHHHHHHHHHHHHHHHHHHHCCCCCCCC |
| 345 | EEEARKFLEQYNQEAEDIYYQQNGFGKGHDA  | -46.72 | 51.6 | HHHHHHHHHHHHHHHHHHHHHHHHHHHCCCCCCCC |
| 437 | EEEARKFLEQYNQEAEDMRYQQNGFGKGHDA  | -46.72 | 51.6 | HHHHHHHHHHHHHHHHHHHHHHHHHHHCCCCCCCC |
| 171 | EEEARKFLEQYNQEAEDMRYQREGFGKGHDA  | -46.72 | 51.6 | HHHHHHHHHHHHHHHHHHHHHHHHHHHCCCCCCCC |
| 248 | EEEARKFLEQYNQEEDMRYQREGFGKGHDA   | -46.72 | 48.4 | HHHHHHHHHHHHHHHHHHHHHHHHHHHCCCCCCCC |
| 858 | EEEARKFLEQYNQESDIRYQQNGFGKGHDA   | -46.72 | 48.4 | HHHHHHHHHHHHHHHHHHHHHHHHHHHCCCCCCCC |
| 766 | EEEARKFLEQYNQESDIRYQQGGFGKGHDA   | -46.72 | 48.4 | HHHHHHHHHHHHHHHHHHHHHHHHHHHCCCCCCCC |
| 279 | EEEARKFLEQYNQESDMRYQQGGFGKGHDA   | -46.72 | 48.4 | HHHHHHHHHHHHHHHHHHHHHHHHHHHCCCCCCCC |
| 360 | EEELKFFLEQLNQEAEEDMRYQQNGFGKGHDA | -46.72 | 51.6 | HHHHHHHHHHHHHHHHHHHHHHHHHHHCCCCCCCC |
| 321 | EEELKFFLEQYNQEAEDIYYQQGGFGKGHDA  | -46.72 | 51.6 | HHHHHHHHHHHHHHHHHHHHHHHHHHHCCCCCCCC |
| 083 | EEELKFFLEQYNQEEDMRYQREGFGKGHSA   | -46.72 | 48.4 | HHHHHHHHHHHHHHHHHHHHHHHHHHHCCCCCCCC |
| 948 | EEELKFFLEQYNQESDMRYQQGGFGKGHDA   | -46.72 | 48.4 | HHHHHHHHHHHHHHHHHHHHHHHHHHHCCCCCCCC |

|     |                                     |        |      |                                        |
|-----|-------------------------------------|--------|------|----------------------------------------|
| 143 | EEELKKFLEQYNQEYEDMFYQQQGFQKGDHSA    | -46.72 | 51.6 | HHHHHHHHHHHHHHHHHHHHHHHHHHHHHHHCCCCCCC |
| 715 | EEELRKLFLEQFNQEYEDMFYQQQGFQKGDHDA   | -46.72 | 51.6 | HHHHHHHHHHHHHHHHHHHHHHHHHHHHHHHCCCCCCC |
| 808 | EEELRKLELEKINNEEEMRYQREGFGKGRGDSR   | -46.71 | 45.2 | HHHHHHHHHHHCHHHHHHHHHHHHHHHHHHCCCCCCC  |
| 769 | EEELKKLLEQLNQEEDMKYQONGFGKGDHDA     | -46.68 | 45.2 | HHHHHHHHHHHHHHHHHHHHHHHHHHHHHHHCCCCCCC |
| 069 | EEEARKFLEKYNNEAEDIRYQQNGFGKGDHDA    | -46.67 | 54.8 | HHHHHHHHHHHHHHHHHHHHHHHHHHHHHHHCCCCCCC |
| 156 | EEEAKKFLEQYNNEEDMFFQKGFQKGDHDA      | -46.66 | 51.6 | HHHHHHHHHHHHHHHHHHHHHHHHHHHHHHHCCCCCCC |
| 667 | EEEARKFLEQFNNEEDMQFQRSGFGKGDHDA     | -46.66 | 51.6 | HHHHHHHHHHHHHHHHHHHHHHHHHHHHHHHCCCCCCC |
| 601 | EEEARKFLEQFNNEEDMFFQKGFQKGDHDA      | -46.66 | 51.6 | HHHHHHHHHHHHHHHHHHHHHHHHHHHHHHHCCCCCCC |
| 468 | EEEARKFLEQYNNEAEDMFFQKGFQKGDHDA     | -46.66 | 48.4 | HHHHHHHHHHHHHHHHHHHHHHHHHHHHHHHCCCCCCC |
| 374 | EEELKKFLEKFNNEEEDMFYQQKGFQKGDHSA    | -46.64 | 64.5 | HHHHHHHHHHHHHHHHHHHHHHHHHHHHHHHCCCCCCC |
| 634 | EEELKKFLEQYNNEAEDMFYQQQGFQKGDHDA    | -46.63 | 51.6 | HHHHHHHHHHHHHHHHHHHHHHHHHHHHHHHCCCCCCC |
| 016 | EEQWKKLEIQINNEEEDMEYQRAGFGKGDHDA    | -46.55 | 45.2 | HHHHHHHHHHHHHHHHHHHHHHHHHHHHHHHCCCCCCC |
| 749 | EEELKKLLEQINQEAEEMQYQRAGFGKGRGDSR   | -46.54 | 54.8 | HHHHHHHHHHHHHHHHHHHHHHHHHHHHHHHCCCCCCC |
| 046 | EEELKKLLEQLNQEEDMRYQONGFGKGRGDSR    | -46.54 | 51.6 | HHHHHHHHHHHHHHHHHHHHHHHHHHHHHHHCCCCCCC |
| 876 | EEELRKLEQLNQEEDMRYQONGFGKGRGDSR     | -46.54 | 48.4 | HHHHHHHHHHHHHHHHHHHHHHHHHHHHHHHCCCCCCC |
| 568 | EEELKKFLDQYNNEEEMRYQONGFGKGRGDSR    | -46.54 | 45.2 | HHHHHHHHHHHHHHHHHHHHHHHHHHHHHHHCCCCCCC |
| 740 | EEELKKILEQINNEEDMRYQQQGFQKGDHDA     | -46.52 | 51.6 | HHHHHHHHHHHHHHHHHHHHHHHHHHHHHHHCCCCCCC |
| 273 | EEELKKILEQLNNEEEDMRYQONGFGKGRGDSR   | -46.52 | 51.6 | HHHHHHHHHHHHHHHHHHHHHHHHHHHHHHHCCCCCCC |
| 339 | EEELKKLELEKINNEAEDIRYQQQGFQKGDHDA   | -46.51 | 58.1 | HHHHHHHHHHHHHHHHHHHHHHHHHHHHHHHCCCCCCC |
| 152 | EEELKKLELEKINNEAEDMRYQQQGFQKGDHDA   | -46.51 | 58.1 | HHHHHHHHHHHHHHHHHHHHHHHHHHHHHHHCCCCCCC |
| 761 | EEELKKLLEKLNNEEEDMRYQQQGFQKGDHDA    | -46.51 | 54.8 | HHHHHHHHHHHHHHHHHHHHHHHHHHHHHHHCCCCCCC |
| 049 | EEELRKLELEKINNEAEDIRYQQNGFGKGRGDSR  | -46.51 | 54.8 | HHHHHHHHHHHHHHHHHHHHHHHHHHHHHHHCCCCCCC |
| 186 | EEELRKLELEKINNEAEDMRYQQQGFQKGRGDSR  | -46.51 | 54.8 | HHHHHHHHHHHHHHHHHHHHHHHHHHHHHHHCCCCCCC |
| 899 | EEELRKLELEKINNEAEDMRYQREGFGKGRGDSR  | -46.51 | 54.8 | HHHHHHHHHHHHHHHHHHHHHHHHHHHHHHHCCCCCCC |
| 004 | EEELRKLELEKLNNEEEDMKYQQQGFQKGRGDSR  | -46.51 | 51.6 | HHHHHHHHHHHHHHHHHHHHHHHHHHHHHHHCCCCCCC |
| 691 | EEELRKLELEKLNNEEKEDMSYQQQGFQKGRGDSR | -46.51 | 51.6 | HHHHHHHHHHHHHHHHHHHHHHHHHHHHHHHCCCCCCC |
| 050 | EEELKKFLEQFNQEYEDMFYQQKGFQKGDHDA    | -46.50 | 54.8 | HHHHHHHHHHHHHHHHHHHHHHHHHHHHHHHCCCCCCC |
| 738 | EEELKKFLEQLNQEEDMRYQQQGFQKGDHSA     | -46.48 | 48.4 | HHHHHHHHHHHHHHHHHHHHHHHHHHHHHHHCCCCCCC |
| 252 | EEEAKMLEKINNEEEDIRYQQQGFQKGDHDA     | -46.47 | 51.6 | HHHHHHHHHHHHHHHHHHHHHHHHHHHHHHHCCCCCCC |
| 521 | EEEARKFLEKFNNEEEDMFYQQKGFQKGRGDSR   | -46.45 | 64.5 | HHHHHHHHHHHHHHHHHHHHHHHHHHHHHHHCCCCCCC |
| 507 | EEEARKFLEKYNNEEEDMRYQRQGFQKGRDGR    | -46.45 | 58.1 | HHHHHHHHHHHCHHHHHHHHHHHHHHHHHHCCCCCCC  |
| 377 | EEEARKFLEKYNNEEEDIRYQQQGFQKGRGDSR   | -46.45 | 58.1 | HHHHHHHHHHHCHHHHHHHHHHHHHHHHHHCCCCCCC  |
| 175 | EEELKKFLEKYNNEAEDIYYQNGFGKGRGDSR    | -46.45 | 61.3 | HHHHHHHHHHHHHHHHHHHHHHHHHHHHHHHCCCCCCC |
| 891 | EEELKKFLEKYNNEEEDIRYQQNGFGKGRGDSR   | -46.45 | 58.1 | HHHHHHHHHHHCHHHHHHHHHHHHHHHHHHCCCCCCC  |
| 531 | EEELKKFLEKYNNEEEDMFYQQKGFQKGRGDSR   | -46.45 | 61.3 | HHHHHHHHHHHHHHHHHHHHHHHHHHHHHHHCCCCCCC |
| 417 | EEEARKFLEQFNNEEEDMFYQQKGFQKGDHDA    | -46.44 | 54.8 | HHHHHHHHHHHHHHHHHHHHHHHHHHHHHHHCCCCCCC |
| 452 | EEEARKFLEQYNNEEEDMRYQRQGFQKGDHDA    | -46.44 | 48.4 | HHHHHHHHHHHCHHHHHHHHHHHHHHHHHHCCCCCCC  |
| 318 | EEELKKFLEQYNNEAEDMRYQQQGFQKGDHDA    | -46.44 | 51.6 | HHHHHHHHHHHHHHHHHHHHHHHHHHHHHHHCCCCCCC |
| 225 | EEEWRFLEQLNNEEEDMRYQQQGFQKGDHSA     | -46.43 | 45.2 | HHHHHHHHHHHHHHHHHHHHHHHHHHHHHHHCCCCCCC |
| 023 | EEEWRFLEQLNNEEEDMRYQREGFGKGDHDA     | -46.43 | 45.2 | HHHHHHHHHHHHHHHHHHHHHHHHHHHHHHHCCCCCCC |
| 370 | EEEAKKFLEQFNNEEEDMFYQQKGFQKGDHSA    | -46.42 | 58.1 | HHHHHHHHHHHHHHHHHHHHHHHHHHHHHHHCCCCCCC |
| 586 | EEEAKKFLEQFNNEEEDMFYQQQGFQKGDHDA    | -46.42 | 58.1 | HHHHHHHHHHHHHHHHHHHHHHHHHHHHHHHCCCCCCC |
| 963 | EEEAKKFLEQYNNEAEDIRYQQQGFQKGDHDA    | -46.42 | 54.8 | HHHHHHHHHHHHHHHHHHHHHHHHHHHHHHHCCCCCCC |
| 905 | EEEAKKFLEQYNNEAEDIYYQNGFGKGDHDA     | -46.42 | 54.8 | HHHHHHHHHHHHHHHHHHHHHHHHHHHHHHHCCCCCCC |
| 832 | EEEAKKFLEQYNNEEEDIRYQQNGFGKGDHDA    | -46.42 | 51.6 | HHHHHHHHHHHHHHHHHHHHHHHHHHHHHHHCCCCCCC |
| 222 | EEEAKKFLEQYNNEEEDIRYQQQGFQKGDHDA    | -46.42 | 51.6 | HHHHHHHHHHHHHHHHHHHHHHHHHHHHHHHCCCCCCC |
| 937 | EEEAKKFLEQYNNEEEDMFYQQQGFQKGDHDA    | -46.42 | 54.8 | HHHHHHHHHHHHHHHHHHHHHHHHHHHHHHHCCCCCCC |
| 919 | EEEARKFLEQFNNEEKEDMRYQQQGFQKGDHDA   | -46.42 | 51.6 | HHHHHHHHHHHHHHHHHHHHHHHHHHHHHHHCCCCCCC |
| 932 | EEEARKFLEQLNNEEEDMQYQRSGFGKGDHDA    | -46.42 | 51.6 | HHHHHHHHHHHHHHHHHHHHHHHHHHHHHHHCCCCCCC |
| 637 | EEEARKFLEQLNNEEEDMRYQQYGFQKGDHDA    | -46.42 | 48.4 | HHHHHHHHHHHHHHHHHHHHHHHHHHHHHHHCCCCCCC |
| 149 | EEEARKFLEQYNNEAEDIYYQNGFGKGDHDA     | -46.42 | 51.6 | HHHHHHHHHHHHHHHHHHHHHHHHHHHHHHHCCCCCCC |
| 555 | EEEARKFLEQYNNEAEDIYYQNGFGKGDHSA     | -46.42 | 51.6 | HHHHHHHHHHHHHHHHHHHHHHHHHHHHHHHCCCCCCC |
| 000 | EEEARKFLEQYNNEAEDMRYQQNGFGKGDHDA    | -46.42 | 51.6 | HHHHHHHHHHHHHHHHHHHHHHHHHHHHHHHCCCCCCC |
| 112 | EEEARKFLEQYNNEAEDMRYQQNGFGKGDHSA    | -46.42 | 51.6 | HHHHHHHHHHHHHHHHHHHHHHHHHHHHHHHCCCCCCC |
| 317 | EEEARKFLEQYNNEAEDMRYQQQGFQKGDHDA    | -46.42 | 51.6 | HHHHHHHHHHHHHHHHHHHHHHHHHHHHHHHCCCCCCC |
| 621 | EEEARKFLEQYNNEAEDMRYQQQGFQKGDHSA    | -46.42 | 51.6 | HHHHHHHHHHHHHHHHHHHHHHHHHHHHHHHCCCCCCC |
| 781 | EEEARKFLEQYNNEAEDMRYQRQGFQKGDHDA    | -46.42 | 51.6 | HHHHHHHHHHHHHHHHHHHHHHHHHHHHHHHCCCCCCC |
| 081 | EEEARKFLEQYNNEEEDMFYQQKGFQKGDHDA    | -46.42 | 51.6 | HHHHHHHHHHHHHHHHHHHHHHHHHHHHHHHCCCCCCC |
| 121 | EEEARKFLEQYNNEEEDMKYQQEGFGKGDHDA    | -46.42 | 48.4 | HHHHHHHHHHHHHHHHHHHHHHHHHHHHHHHCCCCCCC |
| 047 | EEEARKFLEQYNNEEEDMRYQQQGFQKGDHSA    | -46.42 | 48.4 | HHHHHHHHHHHHHHHHHHHHHHHHHHHHHHHCCCCCCC |
| 879 | EEEARKFLEQYNNEEEDMRYQREGFGKGDHDA    | -46.42 | 48.4 | HHHHHHHHHHHCHHHHHHHHHHHHHHHHHHCCCCCCC  |
| 881 | EEEARKFLEQYNNEEEDIRYQQQGFQKGDHSA    | -46.42 | 48.4 | HHHHHHHHHHHHHHHHHHHHHHHHHHHHHHHCCCCCCC |
| 294 | EEEARKFLEQYNNEEEDIRYQQNGFGKGDHDA    | -46.42 | 48.4 | HHHHHHHHHHHHHHHHHHHHHHHHHHHHHHHCCCCCCC |
| 463 | EEEARKFLEQYNNEEEDMRYQQNGFGKGDHDA    | -46.42 | 48.4 | HHHHHHHHHHHHHHHHHHHHHHHHHHHHHHHCCCCCCC |
| 839 | EEEARKFLEQYNNEEEDMRYQQNGFGKGDHSA    | -46.42 | 48.4 | HHHHHHHHHHHHHHHHHHHHHHHHHHHHHHHCCCCCCC |
| 772 | EEEARKFLEQYNNEEEDMRYQQQGFQKGDHDA    | -46.42 | 48.4 | HHHHHHHHHHHHHHHHHHHHHHHHHHHHHHHCCCCCCC |
| 525 | EEEARKFLEQYNNEEEDMEYQRSGFGKGDHDA    | -46.42 | 51.6 | HHHHHHHHHHHHHHHHHHHHHHHHHHHHHHHCCCCCCC |





|     |                               |        |      |                             |
|-----|-------------------------------|--------|------|-----------------------------|
| 018 | EEELKKFLEKYNNEYERMFQQKGFQKGD  | -45.88 | 48.4 | HHHHHHHHHHHHHHHHHHHHHHHHHHH |
| 474 | EEELRKLLDKLNQEQEQMSYQQQGFQGD  | -45.87 | 48.4 | HHHHHHHHHHHHHHHHHHHHHHHHHHH |
| 416 | EEEARKFLEQFNNEYEDMYQQQGFQGH   | -45.82 | 51.6 | HHHHHHHHHHHHHHHHHHHHHHHHHHH |
| 028 | EEEARKFLEKFNNEEDRSYQQQGFQGH   | -45.79 | 54.8 | HHHHHHHHHHHHHHHHHHHHHHHHHHH |
| 037 | EEEARKFLEKFNNEEDRIFYQQKGFQGH  | -45.79 | 58.1 | HHHHHHHHHHHHHHHHHHHHHHHHHHH |
| 257 | EEELKKFLEKYNNEAEDDRYQKEGFQGH  | -45.79 | 54.8 | HHHHHHHHHHHHHHHHHHHHHHHHHHH |
| 309 | EEELKKLEQINNEEDMRYQQYGFQGH    | -45.78 | 45.2 | HHHHHHHHHHHHHHHHHHHHHHHHHHH |
| 554 | EEELKKLEQINNEAEDMRYQQQGFQGD   | -45.74 | 54.8 | HHHHHHHHHHHHHHHHHHHHHHHHHHH |
| 269 | EEELKKLEQINNEEDIRYQQQGFQGD    | -45.74 | 51.6 | HHHHHHHHHHHHHHHHHHHHHHHHHHH |
| 589 | EEELKKLEQINNEEDMRYQQQGFQGD    | -45.74 | 51.6 | HHHHHHHHHHHHHHHHHHHHHHHHHHH |
| 861 | EEELKKLEQINNEEDMRYQREGFGQGD   | -45.74 | 51.6 | HHHHHHHHHHHHHHHHHHHHHHHHHHH |
| 206 | EEELRKLEQINNEEKDMRYQRAFGQGD   | -45.74 | 48.4 | HHHHHHHHHHHHHHHHHHHHHHHHHHH |
| 177 | EEELRKLEQLNNEQEDMRYQQQGFQGD   | -45.74 | 48.4 | HHHHHHHHHHHHHHHHHHHHHHHHHHH |
| 644 | EEELKKLEAINNREEDMRYQQYGFQGH   | -45.72 | 41.9 | HHHHHHHHHHHHHHHHHHHHHHHHHHH |
| 443 | EEELKKFLEQFNNEYEDMFYQQKGFQGD  | -45.70 | 61.3 | HHHHHHHHHHHHHHHHHHHHHHHHHHH |
| 221 | EEEARKFLEQFNNEYEDMFYQQKGFQGD  | -45.69 | 61.3 | HHHHHHHHHHHHHHHHHHHHHHHHHHH |
| 182 | EEEARKFLEQLNNEEDMRYQQQGFQGD   | -45.69 | 54.8 | HHHHHHHHHHHHHHHHHHHHHHHHHHH |
| 997 | EEEARFLEQYNNEAEDIRYQQGGFGQGD  | -45.69 | 58.1 | HHHHHHHHHHHHHHHHHHHHHHHHHHH |
| 348 | EEEARFLEQYNNEAEDMRYQQQGFQGD   | -45.69 | 58.1 | HHHHHHHHHHHHHHHHHHHHHHHHHHH |
| 660 | EEEARFLEQYNNEEDMRYQRQGFQGD    | -45.69 | 54.8 | HHHHHHHHHHHHHHHHHHHHHHHHHHH |
| 305 | EEELKKFLEQLNNEEDIRYQQQGFQGD   | -45.69 | 54.8 | HHHHHHHHHHHHHHHHHHHHHHHHHHH |
| 450 | EEELKKFLEQYNNEAEDMRYQRYGFQGD  | -45.69 | 58.1 | HHHHHHHHHHHHHHHHHHHHHHHHHHH |
| 939 | EEEWKFFLEQYNNEEDMYQQQGFQGD    | -45.69 | 51.6 | HHHHHHHHHHHHHHHHHHHHHHHHHHH |
| 867 | EEELKKLLQLNNEEEMQYQRAFGQGH    | -45.68 | 38.7 | HHHHHHHHHHHHHHHHHHHHHHHHHHH |
| 246 | EEELKKFLEQFNNVYEDMFYQQKGFQGD  | -45.63 | 58.1 | HHHHHHHHHHHHHHHHHHHHHHHHHHH |
| 497 | EEELKKLLDQINNEEEMRYQQQGFQGH   | -45.62 | 41.9 | HHHHHHHHHHHHHHHHHHHHHHHHHHH |
| 378 | EEELKKFLEKLNNEEDDRYQQQGFQGH   | -45.59 | 51.6 | HHHHHHHHHHHHHHHHHHHHHHHHHHH |
| 238 | EEELRKLEKINQEAQIRYQQNGFGQGH   | -45.57 | 41.9 | HHHHHHHHHHHHHHHHHHHHHHHHHHH |
| 696 | EEEARKMLEKINNEEDIRYQQQGFQGD   | -45.55 | 54.8 | HHHHHHHHHHHHHHHHHHHHHHHHHHH |
| 189 | EEEARKFLQYNNEYEDMFYQQKGFQGH   | -45.55 | 51.6 | HHHHHHHHHHHHHHHHHHHHHHHHHHH |
| 790 | EEELRKLEQFNQEYEDMFYQQQGFQGD   | -45.49 | 58.1 | HHHHHHHHHHHHHHHHHHHHHHHHHHH |
| 888 | EEEARFLEQYNQEAEDMRYQQQGFQGD   | -45.47 | 58.1 | HHHHHHHHHHHHHHHHHHHHHHHHHHH |
| 412 | EEEARFLEQYNQEAEDMFYQQKGFQGD   | -45.47 | 58.1 | HHHHHHHHHHHHHHHHHHHHHHHHHHH |
| 266 | EEEARFLEQYNQEAEDMRYQQQGFQGD   | -45.47 | 54.8 | HHHHHHHHHHHHHHHHHHHHHHHHHHH |
| 654 | EEELKKFLEQLNQEEDMRYQQQGFQGD   | -45.47 | 54.8 | HHHHHHHHHHHHHHHHHHHHHHHHHHH |
| 232 | EEELKKFLEQYNQEAEDMRYQQNGFGQGD | -45.47 | 58.1 | HHHHHHHHHHHHHHHHHHHHHHHHHHH |
| 870 | EEELKKFLEQYNQEAEDMRYQREGFGQGD | -45.47 | 54.8 | HHHHHHHHHHHHHHHHHHHHHHHHHHH |
| 528 | EQEARKFLEQYNQEAEDMRYQREGFGQGD | -45.47 | 51.6 | HHHHHHHHHHHHHHHHHHHHHHHHHHH |
| 661 | EEELRKLEQINQEAEDMRYQQQGFQGD   | -45.44 | 48.4 | HHHHHHHHHHHHHHHHHHHHHHHHHHH |
| 195 | EEELKKLEKINQEAQIRYQQNGFGQGH   | -45.39 | 45.2 | HHHHHHHHHHHHHHHHHHHHHHHHHHH |
| 032 | EEELKKLEKINQEEQIRYQQQGFQGH    | -45.39 | 41.9 | HHHHHHHHHHHHHHHHHHHHHHHHHHH |
| 713 | EEELKKLEKINQEEQIRYQKEGFQGH    | -45.39 | 41.9 | HHHHHHHHHHHHHHHHHHHHHHHHHHH |
| 168 | EEELKKLEKLNQEKEQIRYQQNGFGQGH  | -45.39 | 41.9 | HHHHHHHHHHHHHHHHHHHHHHHHHHH |
| 541 | EEELKKLEKLNQEKEQMSYQQQGFQGH   | -45.39 | 41.9 | HHHHHHHHHHHHHHHHHHHHHHHHHHH |
| 119 | EEELRKLEKINQEAQIRYQRYGFQGH    | -45.39 | 41.9 | HHHHHHHHHHHHHHHHHHHHHHHHHHH |
| 160 | EEELRKLEKINQEAQMSYQQQGFQGH    | -45.39 | 41.9 | HHHHHHHHHHHHHHHHHHHHHHHHHHH |
| 864 | EEELRKLEKLNQEKEQMSYQQQGFQGH   | -45.39 | 38.7 | HHHHHHHHHHHHHHHHHHHHHHHHHHH |
| 346 | EEELRKLEKLNQEQEQMSYQQQGFQGH   | -45.39 | 38.7 | HHHHHHHHHHHHHHHHHHHHHHHHHHH |
| 060 | EEEARKFLEKYNNEAEDMRYQRQGFQGD  | -45.35 | 61.3 | HHHHHHHHHHHHHHHHHHHHHHHHHHH |
| 679 | EEELKKLEKINNEAQIRFQQNGFGQGD   | -45.34 | 41.9 | HHHHHHHHHHHHHHHHHHHHHHHHHHH |
| 515 | EEELRKLEKIEQEREQITYQQNGFGQGH  | -45.32 | 35.5 | HHHHHHHHHHHHHHHHHHHHHHHHHHH |
| 746 | EEELRKLEKLNNEEQIRYQQNGFGQGH   | -45.28 | 38.7 | HHHHHHHHHHHHHHHHHHHHHHHHHHH |
| 540 | EEEARKFLEQLNNEEEMRYQQYGFQGH   | -45.26 | 41.9 | HHHHHHHHHHHHHHHHHHHHHHHHHHH |
| 518 | EEEARKFLEQYNQEAEDMRYQQQGFQGD  | -45.25 | 58.1 | HHHHHHHHHHHHHHHHHHHHHHHHHHH |
| 234 | EEQARKFLEQYNNEEDMRYQQQGFQGD   | -45.25 | 58.1 | HHHHHHHHHHHHHHHHHHHHHHHHHHH |
| 673 | EEELKKFLEQYNNEEDIRYQQNGFGQGH  | -45.20 | 48.4 | HHHHHHHHHHHHHHHHHHHHHHHHHHH |
| 184 | EEEAKFLEQLNNEEDMRYQQQGFQGD    | -45.18 | 58.1 | HHHHHHHHHHHHHHHHHHHHHHHHHHH |
| 853 | EEEAKFLEQLNNEEDMRYQQYGFQGD    | -45.18 | 58.1 | HHHHHHHHHHHHHHHHHHHHHHHHHHH |
| 502 | EEEARFLEQLNNEEDMRYQQNGFGQGD   | -45.18 | 54.8 | HHHHHHHHHHHHHHHHHHHHHHHHHHH |
| 272 | EEEARFLEQLNNEEDMRYQQYGFQGD    | -45.18 | 54.8 | HHHHHHHHHHHHHHHHHHHHHHHHHHH |
| 593 | EEEARFLEQYNNEAEDIRYQQNGFGQGD  | -45.18 | 58.1 | HHHHHHHHHHHHHHHHHHHHHHHHHHH |
| 154 | EEEARFLEQYNNEAEDMRYQQNGFGQGD  | -45.18 | 58.1 | HHHHHHHHHHHHHHHHHHHHHHHHHHH |
| 324 | EEEARFLEQYNNEEDMFYQQKGFQGD    | -45.18 | 58.1 | HHHHHHHHHHHHHHHHHHHHHHHHHHH |
| 801 | EEEARFLEQYNNEEDMRYQQEFGQGD    | -45.18 | 54.8 | HHHHHHHHHHHHHHHHHHHHHHHHHHH |
| 822 | EEELKKFLEQFNNEYEDMFYQQKGFQGD  | -45.18 | 61.3 | HHHHHHHHHHHHHHHHHHHHHHHHHHH |
| 074 | EEELKKFLEQLNNEEDMRYQQYGFQGD   | -45.18 | 54.8 | HHHHHHHHHHHHHHHHHHHHHHHHHHH |
| 151 | EEELKKFLEQYNNEAEDIYYQQNGFGQGD | -45.18 | 58.1 | HHHHHHHHHHHHHHHHHHHHHHHHHHH |

|     |                                  |        |      |                                 |
|-----|----------------------------------|--------|------|---------------------------------|
| 472 | EEELKKFLEQYNNEAEDMRYQQGGFGKGDSR  | -45.18 | 58.1 | HHHHHHHHHHHHHHHHHHHHHHHCCCCCCCC |
| 382 | EEELKKFLEQYNNEAEDMRYQQNGFGKGDSR  | -45.18 | 58.1 | HHHHHHHHHHHHHHHHHHHHHHHCCCCCCCC |
| 786 | EEELKKFLEQYNNEAEDMRYQQGGFGKGDSR  | -45.18 | 58.1 | HHHHHHHHHHHHHHHHHHHHHHHCCCCCCCC |
| 780 | EEELKKFLEQYNNEAEDMRYQRQGGFGKGDSR | -45.18 | 58.1 | HHHHHHHHHHHHHHHHHHHHHHHCCCCCCCC |
| 519 | EEELKKFLEQYNNEAEDIRYQQNGFGKGDSR  | -45.18 | 54.8 | HHHHHHHHHHHHHHHHHHHHHHHCCCCCCCC |
| 838 | EEELKKFLEQYNNEYEDMFYQQKGFGKGDSR  | -45.18 | 58.1 | HHHHHHHHHHHHHHHHHHHHHHHCCCCCCCC |
| 304 | EEELKKFLEQYNNESEDMRYQQGGFGKGDSR  | -45.17 | 54.8 | HHHHHHHHHHHHHHHHHHHHHHHCCCCCCCC |
| 328 | EEEARKFLEQYNQEAEDMRYQQNGFGKGDSR  | -45.15 | 58.1 | HHHHHHHHHHHHHHHHHHHHHHHCCCCCCCC |
| 422 | EEELRKLEKLNNEEDDRYQQGGFGKGDSR    | -45.11 | 51.6 | HHHHHHHHHHHHHHHHHHHHHHHCCCCCCCC |
| 179 | EEELKKLEKLNNEAEQIRYQQNGFGQGHDA   | -45.09 | 45.2 | HHHHHHHHHHHHHHHHHHHHHHHCCCCCCCC |
| 215 | EEELKKLEKLNNEAEQITYQQNGFGQGHDA   | -45.09 | 45.2 | HHHHHHHHHHHHHHHHHHHHHHHCCCCCCCC |
| 522 | EEELKKLEKLNNEAEQITYQQNGFGQGHSA   | -45.09 | 45.2 | HHHHHHHHHHHHHHHHHHHHHHHCCCCCCCC |
| 635 | EEELKKLEKLNNEEQMRYQQGGFGQGHDA    | -45.09 | 41.9 | HHHHHHHHHHHCHHHHHHHHHHCCCCCCCC  |
| 172 | EEELKKLEKLNNEEQMSYQQGGFGQGHDA    | -45.09 | 41.9 | HHHHHHHHHHHHHHHHHHHHHHHCCCCCCCC |
| 353 | EEELKKLEKLNNEEQMRYQQNGFGQGHDA    | -45.09 | 41.9 | HHHHHHHHHHHCHHHHHHHHHHCCCCCCCC  |
| 388 | EEELKKLEKLNNEEQMRYQQGGFGQGHDA    | -45.09 | 41.9 | HHHHHHHHHHHCHHHHHHHHHHCCCCCCCC  |
| 928 | EEELKKLEKLNNEEQMRYQRQGGFGQGHDA   | -45.09 | 41.9 | HHHHHHHHHHHCHHHHHHHHHHCCCCCCCC  |
| 901 | EEELKKLEKLNNEAEQITYQQNGFGQGHDA   | -45.09 | 41.9 | HHHHHHHHHHHHHHHHHHHHHHHCCCCCCCC |
| 549 | EEELKKLEKLNNEAEQIRYQQGGFGQGHDF   | -45.09 | 41.9 | HHHHHHHHHHHHHHHHHHHHHHHCCCCCCCC |
| 162 | EEELKKLEKLNNEEQIRYQQNGFGQGHDA    | -45.09 | 41.9 | HHHHHHHHHHHHHHHHHHHHHHHCCCCCCCC |
| 941 | EEELKKLEKLNNEEQMRYQQNGFGQGHDA    | -45.09 | 41.9 | HHHHHHHHHHHHHHHHHHHHHHHCCCCCCCC |
| 509 | EEELKKLEKLNNEEQMRYQRQGGFGQGHDA   | -45.09 | 41.9 | HHHHHHHHHHHHHHHHHHHHHHHCCCCCCCC |
| 331 | EEELRKLEKLNNEAEQIRYQQGGFGQGHDF   | -45.09 | 41.9 | HHHHHHHHHHHHHHHHHHHHHHHCCCCCCCC |
| 478 | EEELRKLEKLNNEAEQIRYQQNGFGQGHDA   | -45.09 | 41.9 | HHHHHHHHHHHHHHHHHHHHHHHCCCCCCCC |
| 306 | EEELRKLEKLNNEEQIRYQQGGFGQGHDA    | -45.09 | 38.7 | HHHHHHHHHHHCHHHHHHHHHHCCCCCCCC  |
| 700 | EEELRKLEKLNNEEQMRYQRAGFGQGHDA    | -45.09 | 38.7 | HHHHHHHHHHHHHHHHHHHHHHHCCCCCCCC |
| 191 | EEELRKLEKLNNEEQIKYQQNGFGQGHDA    | -45.09 | 38.7 | HHHHHHHHHHHCHHHHHHHHHHCCCCCCCC  |
| 242 | EEELRKLEKLNNEEQMRYQQNGFGQGHDA    | -45.09 | 38.7 | HHHHHHHHHHHCHHHHHHHHHHCCCCCCCC  |
| 227 | EEELRKLEKLNNEEQMRYQQGGFGQGHDA    | -45.09 | 38.7 | HHHHHHHHHHHCHHHHHHHHHHCCCCCCCC  |
| 856 | EEELRKLEKLNNEEQMSYQQGGFGQGHDA    | -45.09 | 38.7 | HHHHHHHHHHHHHHHHHHHHHHHCCCCCCCC |
| 173 | EEELRKLEKLNNEEQMRYQQGGFGQGHDF    | -45.09 | 38.7 | HHHHHHHHHHHHHHHHHHHHHHHCCCCCCCC |
| 862 | EEELRKLEKLNNEEQMRYQQGGFGQGHDA    | -45.09 | 38.7 | HHHHHHHHHHHHHHHHHHHHHHHCCCCCCCC |
| 447 | EEELRKLEKLNNEEQMRYQRQGGFGQGHDA   | -45.09 | 38.7 | HHHHHHHHHHHHHHHHHHHHHHHCCCCCCCC |
| 007 | EEELKKFLEKYNQEAEMRFQQGGFGQGHDA   | -45.07 | 45.2 | HHHHHHHHHHHHHHHHHHHHHHHCCCCCCCC |
| 931 | EEEARKFLEKYNNESEDIRYQQNGFGKGHDA  | -45.04 | 51.6 | HHHHHHHHHHHCHHHHHHHHHHCCCCCCCC  |
| 051 | EEELKKLEKLNNEEDMRYQQGGFGKGDSR    | -45.03 | 51.6 | HHHHHHHHHHHHHHHHHHHHHHHCCCCCCCC |
| 407 | EESARKFLDKFNNEYEQMFYQKEGFGQGHDA  | -45.02 | 54.8 | HHHHHHHHHHHHHHHHHHHHHHHCCCCCCCC |
| 595 | EEELKKLEKLNQEAEEMRKQQGGFGGSGKDA  | -44.96 | 38.7 | HHHHHHHHHHHHHHHHHHHHHHHCCCCCCCC |
| 883 | EEELKKLEKLNQEAEQIRYQRQGGFGQGHDA  | -44.91 | 41.9 | HHHHHHHHHHHHHHHHHHHHHHHCCCCCCCC |
| 629 | EEEARKFLEQYNNEEDMYQQKGFGKGDSR    | -44.86 | 54.8 | HHHHHHHHHHHHHHHHHHHHHHHCCCCCCCC |
| 990 | EEEARKFLEKFNQEAQIRYQQNGFGQGHDA   | -44.82 | 51.6 | HHHHHHHHHHHHHHHHHHHHHHHCCCCCCCC |
| 658 | EEEARKFLEKYNQEAQIRYQQNGFGQGHDA   | -44.82 | 45.2 | HHHHHHHHHHHHHHHHHHHHHHHCCCCCCCC |
| 599 | EEEARKFLEKYNQEAQIRYQQGGFGQGHDA   | -44.82 | 45.2 | HHHHHHHHHHHHHHHHHHHHHHHCCCCCCCC |
| 369 | EEELKKFLEKFNQEAQMFYQQKGFGQGHDA   | -44.82 | 51.6 | HHHHHHHHHHHHHHHHHHHHHHHCCCCCCCC |
| 802 | EEELKKFLEKLNQEAQIRYQQGGFGQGHSA   | -44.82 | 45.2 | HHHHHHHHHHHHHHHHHHHHHHHCCCCCCCC |
| 503 | EEELKKFLEKLNQEAQIRYQQGGFGQGHDA   | -44.82 | 45.2 | HHHHHHHHHHHHHHHHHHHHHHHCCCCCCCC |
| 851 | EEELKKFLEKYNQEAQIRYQQNGFGQGHDA   | -44.82 | 48.4 | HHHHHHHHHHHHHHHHHHHHHHHCCCCCCCC |
| 205 | EEELKKFLEKYNQEAQLRYQQKGFGQGHDA   | -44.82 | 51.6 | HHHHHHHHHHHHHHHHHHHHHHHCCCCCCCC |
| 456 | EEELKKFLEKYNQEAQIRYQQNGFGQGHDA   | -44.82 | 45.2 | HHHHHHHHHHHHHHHHHHHHHHHCCCCCCCC |
| 217 | EEEARKMLEQINNEEDMRYQQYGFKGDSR    | -44.80 | 51.6 | HHHHHHHHHHHHHHHHHHHHHHHCCCCCCCC |
| 110 | EEELKKLEKLNQEAEQMRYYQYGFQGHDA    | -44.79 | 41.9 | HHHHHHHHHHHHHHHHHHHHHHHCCCCCCCC |
| 985 | EEEARKMLEQINNEAEDMRYQQNGFGKGDSR  | -44.78 | 54.8 | HHHHHHHHHHHHHHHHHHHHHHHCCCCCCCC |
| 873 | EEEARKFLEKFNNEYEQMFYQQKGFGQGHSA  | -44.71 | 51.6 | HHHHHHHHHHHHHHHHHHHHHHHCCCCCCCC |
| 500 | EEELRKILEQINQEAQMRYYQYGFQGHDA    | -44.67 | 41.9 | HHHHHHHHHHHHHHHHHHHHHHHCCCCCCCC |
| 672 | EQEAREFLKQFNNEEYDMFYQQKGFGKGHDA  | -44.65 | 51.6 | HHHHHHHHHHHHHHHHHHHHHHHCCCCCCCC |
| 596 | EEELRKILEQINNEEQMRYQQGGFGQGHSA   | -44.63 | 35.5 | HHHHHHHHHHHCHHHHHHHHHHCCCCCCCC  |
| 477 | EEELKKLEQINQEAQMRYYQKEGFGQGHDA   | -44.62 | 41.9 | HHHHHHHHHHHHHHHHHHHHHHHCCCCCCCC |
| 542 | EEELKKLEQINQEAQMRYYQNGFGQGHDA    | -44.62 | 41.9 | HHHHHHHHHHHHHHHHHHHHHHHCCCCCCCC |
| 445 | EEELKKLEQINQEAQMRYYQQGGFGQGHDA   | -44.62 | 41.9 | HHHHHHHHHHHHHHHHHHHHHHHCCCCCCCC |
| 760 | EEELKKLEQLNQEKEQMSYQRQYGFQGHDA   | -44.62 | 38.7 | HHHHHHHHHHHHHHHHHHHHHHHCCCCCCCC |
| 249 | EEELRKLEQINQEAQMRYYQNGFGQGHDA    | -44.62 | 38.7 | HHHHHHHHHHHHHHHHHHHHHHHCCCCCCCC |
| 434 | EEELRKLEQINQEAQMRYYQREGFGQGHDA   | -44.62 | 35.5 | HHHHHHHHHHHHHHHHHHHHHHHCCCCCCCC |
| 677 | EEELRKLEQLNQEAEQMRYYQQGGFGQGHDA  | -44.62 | 35.5 | HHHHHHHHHHHHHHHHHHHHHHHCCCCCCCC |
| 293 | EEELKKLEQINQEAQMRYYQREGFGQGHDA   | -44.60 | 38.7 | HHHHHHHHHHHHHHHHHHHHHHHCCCCCCCC |
| 639 | EEEARKFLEQFNNEEDMRYQQGGFGKGDSR   | -44.58 | 58.1 | HHHHHHHHHHHHHHHHHHHHHHHCCCCCCCC |
| 752 | EEELRKLEKYNNEAEDDRYQQGGFGKGDSR   | -44.55 | 58.1 | HHHHHHHHHHHHHHHHHHHHHHHCCCCCCCC |
| 583 | EEELKKFLEQLNNDKEQMEYQRAGFGQGHDA  | -44.54 | 38.7 | HHHHHHHHHHHHHHHHHHHHHHHCCCCCCCC |

|     |                                    |        |      |                                    |
|-----|------------------------------------|--------|------|------------------------------------|
| 868 | EEEAKKFLKYNNEYEQMEYQRTGRGQGHDF     | -44.53 | 48.4 | HHHHHHHHHHHHHHHHHHHHHHHHHHHCCCCCCC |
| 840 | EEEARKFLEKFNNEAEMQYQQRAGFGQGHDA    | -44.53 | 51.6 | HHHHHHHHHHHHHHHHHHHHHHHHHHHCCCCCCC |
| 470 | EEEARKFLEKFNNEEEMQRYQQEGFGQGHSA    | -44.53 | 48.4 | HHHHHHHHHHHCHHHHHHHHHHHHCCCCCCC    |
| 118 | EEEARKFLEKFNNEEYQMFYQQKGFQGHDA     | -44.53 | 51.6 | HHHHHHHHHHHHHHHHHHHHHHHHHHHCCCCCCC |
| 607 | EEEARKFLEKLNNEEEMQRYQQQGFQGHDA     | -44.53 | 45.2 | HHHHHHHHHHHHHHHHHHHHHHHHHHHCCCCCCC |
| 165 | EEEARKFLEKLNNEEEMQRYQQQGFQGHSA     | -44.53 | 45.2 | HHHHHHHHHHHHHHHHHHHHHHHHHHHCCCCCCC |
| 039 | EEEARKFLEKLNNEEEMQRYQQYGFQGHDA     | -44.53 | 45.2 | HHHHHHHHHHHHHHHHHHHHHHHHHHHCCCCCCC |
| 414 | EEEARKFLEKYNNEAEQIRYQQNGFGQGHDA    | -44.53 | 48.4 | HHHHHHHHHHHHHHHHHHHHHHHHHHHCCCCCCC |
| 087 | EEEARKFLEKYNNEAEQIYYQQNGFGQGHDA    | -44.53 | 48.4 | HHHHHHHHHHHHHHHHHHHHHHHHHHHCCCCCCC |
| 548 | EEEARKFLEKYNNEEEMQMFYQQKGFQGHDA    | -44.53 | 48.4 | HHHHHHHHHHHCHHHHHHHHHHHHCCCCCCC    |
| 903 | EEEARKEFLEKYNNEAEQIRYQQNGFGQGHDA   | -44.53 | 45.2 | HHHHHHHHHHHCHHHHHHHHHHHHCCCCCCC    |
| 633 | EEEARKFLEKYNNEEYQIFYQQKGFQGHDA     | -44.53 | 48.4 | HHHHHHHHHHHHHHHHHHHHHHHHHHHCCCCCCC |
| 678 | EEELKKFLEKFNNEEEMQSYQQQGFQGHDA     | -44.53 | 48.4 | HHHHHHHHHHHCHHHHHHHHHHHHCCCCCCC    |
| 829 | EEELKKFLEKFNNEEYQIFYQQKGFQGHDA     | -44.53 | 51.6 | HHHHHHHHHHHHHHHHHHHHHHHHHHHCCCCCCC |
| 956 | EEELKKFLEKFNNEEYQMFYQQKGFQGHDA     | -44.53 | 51.6 | HHHHHHHHHHHHHHHHHHHHHHHHHHHCCCCCCC |
| 493 | EEELKKFLEKFNNEEYQMFYQQKGFQGHSA     | -44.53 | 51.6 | HHHHHHHHHHHHHHHHHHHHHHHHHHHCCCCCCC |
| 768 | EEELKKFLEKLNNEEEMQRYQQYGFQGHDA     | -44.53 | 45.2 | HHHHHHHHHHHCHHHHHHHHHHHHCCCCCCC    |
| 737 | EEELKKFLEKYNNEAEQIRYQQNGFGQGHDA    | -44.53 | 48.4 | HHHHHHHHHHHHHHHHHHHHHHHHHHHCCCCCCC |
| 671 | EEELKKFLEKYNNEAEQIRYQQQGFQGHDA     | -44.53 | 48.4 | HHHHHHHHHHHHHHHHHHHHHHHHHHHCCCCCCC |
| 395 | EEELKKFLEKYNNEAEQIYYQQNGFGQGHDA    | -44.53 | 48.4 | HHHHHHHHHHHHHHHHHHHHHHHHHHHCCCCCCC |
| 392 | EEELKKFLEKYNNEAEQIYYQQNGFGQGHSA    | -44.53 | 48.4 | HHHHHHHHHHHHHHHHHHHHHHHHHHHCCCCCCC |
| 077 | EEELKKFLEKYNNEAEQIRYQQQGFQGHDA     | -44.53 | 48.4 | HHHHHHHHHHHHHHHHHHHHHHHHHHHCCCCCCC |
| 198 | EEELKKFLEKYNNEEEMQRYQREGFGQGHDA    | -44.53 | 45.2 | HHHHHHHHHHHCHHHHHHHHHHHHCCCCCCC    |
| 992 | EEELKKFLEKYNNEEEMQSYQQQGFQGHDA     | -44.53 | 45.2 | HHHHHHHHHHHCHHHHHHHHHHHHCCCCCCC    |
| 202 | EEELKKFLEKYNNEAEQIRYQQNGFGQGHDA    | -44.53 | 45.2 | HHHHHHHHHHHHHHHHHHHHHHHHHHHCCCCCCC |
| 946 | EEELKKFLEKYNNEAEQIRYQQQGFQGHDA     | -44.53 | 45.2 | HHHHHHHHHHHHHHHHHHHHHHHHHHHCCCCCCC |
| 571 | EEELKKFLEKYNNEAEQIRYQQQGFQGHDA     | -44.53 | 45.2 | HHHHHHHHHHHHHHHHHHHHHHHHHHHCCCCCCC |
| 243 | EEELKKFLEKYNNEEYQMFYQQKGFQGHDA     | -44.53 | 48.4 | HHHHHHHHHHHHHHHHHHHHHHHHHHHCCCCCCC |
| 435 | EEELRKFLKYNNEEYQIFYQQKGFQGHDA      | -44.53 | 45.2 | HHHHHHHHHHHHHHHHHHHHHHHHHHHCCCCCCC |
| 480 | EQEARKFLEKYNNEAEQIYYQQNGFGQGHDA    | -44.53 | 45.2 | HHHHHHHHHHHHHHHHHHHHHHHHHHHCCCCCCC |
| 183 | EEELKKFLKYNNEAEQISEEMRQKQNGFGSGKDA | -44.52 | 38.7 | HHHHHHHHHHHHHHHHHHHHHHHHHHHCCCCCCC |
| 034 | EEELKKLEQLNQEEMQRYQQYGFQGHDA       | -44.48 | 38.7 | HHHHHHHHHHHHHHHHHHHHHHHHHHHCCCCCCC |
| 730 | EEELKKLEKLNQEQEQMSKQQQGFSGKDA      | -44.46 | 38.7 | HHHHHHHHHHHHHHHHHHHHHHHHHHHCCCCCCC |
| 914 | EEEARKFLEKYNQEAEEIYKQQNGFGSGKDA    | -44.40 | 45.2 | HHHHHHHHHHHHHHHHHHHHHHHHHHHCCCCCCC |
| 573 | EEELKKLEQLNNEEQMSYQQQGFQGDSR       | -44.38 | 45.2 | HHHHHHHHHHHHHHHHHHHHHHHHHHHCCCCCCC |
| 375 | EEELKKLEKLNNEAEQIRYQQNGFGGDSR      | -44.36 | 51.6 | HHHHHHHHHHHHHHHHHHHHHHHHHHHCCCCCCC |
| 964 | EEELKKLEKLNNEEMQRYQQQGFQGDSR       | -44.36 | 48.4 | HHHHHHHHHHHCHHHHHHHHHHHHCCCCCCC    |
| 136 | EEELRKLEKLNNEEQEISIYQQNGFGQGDSR    | -44.36 | 45.2 | HHHHHHHHHHHHHHHHHHHHHHHHHHHCCCCCCC |
| 418 | EEELRKLEKLNNEEQMRYQQNGFGQGDSR      | -44.36 | 45.2 | HHHHHHHHHHHHHHHHHHHHHHHHHHHCCCCCCC |
| 645 | EEEARKFLEKFNQEQEYQIFYQQKGFQGHDA    | -44.35 | 51.6 | HHHHHHHHHHHHHHHHHHHHHHHHHHHCCCCCCC |
| 734 | EEEARKFLEKYNQEEEQMYQRQGFQGHDA      | -44.35 | 45.2 | HHHHHHHHHHHHHHHHHHHHHHHHHHHCCCCCCC |
| 127 | EEELKKLEQLNNEEEMQRYQQQGFQGHDA      | -44.34 | 38.7 | HHHHHHHHHHHCHHHHHHHHHHHHCCCCCCC    |
| 878 | EEELRKLEQLNNEEEMQRYQQYGFQGHDA      | -44.34 | 35.5 | HHHHHHHHHHHCHHHHHHHHHHHHCCCCCCC    |
| 564 | EEELKKLEQLNNEAEQIRYQQNGFGQGHDA     | -44.32 | 41.9 | HHHHHHHHHHHHHHHHHHHHHHHHHHHCCCCCCC |
| 665 | EEELKKLEQLNNEAEQIRYQQNGFGQGHSA     | -44.32 | 41.9 | HHHHHHHHHHHHHHHHHHHHHHHHHHHCCCCCCC |
| 190 | EEELKKLEQLNNEAEQIRYQQNGFGQGHDA     | -44.32 | 41.9 | HHHHHHHHHHHHHHHHHHHHHHHHHHHCCCCCCC |
| 550 | EEELKKLEQLNNEEEMQRYQQQGFQGHDA      | -44.32 | 38.7 | HHHHHHHHHHHCHHHHHHHHHHHHCCCCCCC    |
| 335 | EEELKKLEQLNNEEEMQRYQQYGFQGHDA      | -44.32 | 38.7 | HHHHHHHHHHHCHHHHHHHHHHHHCCCCCCC    |
| 214 | EEELKKLEQLNNEEEMQRYQRAGFGQGHDA     | -44.32 | 38.7 | HHHHHHHHHHHHHHHHHHHHHHHHHHHCCCCCCC |
| 837 | EEELKKLEQLNNEEEMQRYQQGFGQGHDF      | -44.32 | 38.7 | HHHHHHHHHHHCHHHHHHHHHHHHCCCCCCC    |
| 024 | EEELKKLEQLNNEEEMQRYQQNGFGQGHDA     | -44.32 | 38.7 | HHHHHHHHHHHCHHHHHHHHHHHHCCCCCCC    |
| 875 | EEELKKLEQLNNEEQMSYQQQGFQGHDA       | -44.32 | 38.7 | HHHHHHHHHHHHHHHHHHHHHHHHHHHCCCCCCC |
| 557 | EEELKKLEQLNNEEQMSYQQQGFQGHSA       | -44.32 | 38.7 | HHHHHHHHHHHHHHHHHHHHHHHHHHHCCCCCCC |
| 457 | EEELKKLEQLNNEEQMRYQQNGFGQGHDA      | -44.32 | 38.7 | HHHHHHHHHHHHHHHHHHHHHHHHHHHCCCCCCC |
| 597 | EEELKKLEQLNNEEQMRYQQQGFQGHDA       | -44.32 | 38.7 | HHHHHHHHHHHHHHHHHHHHHHHHHHHCCCCCCC |
| 880 | EEELKKLEQLNNEEQMRYQRQGFQGHDA       | -44.32 | 38.7 | HHHHHHHHHHHHHHHHHHHHHHHHHHHCCCCCCC |
| 949 | EEELKKLEQLNNEEQMRYQRQYGFQGHDA      | -44.32 | 38.7 | HHHHHHHHHHHHHHHHHHHHHHHHHHHCCCCCCC |
| 735 | EEELKKLEQLNNEAEQIRYQQNGFGQGHDA     | -44.32 | 38.7 | HHHHHHHHHHHHHHHHHHHHHHHHHHHCCCCCCC |
| 690 | EEELRKLEQLNNEEQMSYQQQGFQGHDA       | -44.32 | 38.7 | HHHHHHHHHHHHHHHHHHHHHHHHHHHCCCCCCC |
| 710 | EEELRKLEQLNNEEEMQRYQQQGFQGHDA      | -44.32 | 35.5 | HHHHHHHHHHHCHHHHHHHHHHHHCCCCCCC    |
| 791 | EEELRKLEQLNNEEEMQRYQREGFGQGHDA     | -44.32 | 35.5 | HHHHHHHHHHHCHHHHHHHHHHHHCCCCCCC    |
| 410 | EEELRKLEQLNNEEEMQRYQQNGFGQGHDA     | -44.32 | 35.5 | HHHHHHHHHHHCHHHHHHHHHHHHCCCCCCC    |
| 517 | EEELRKLEQLNNEEQMRYQRQGFQGHDA       | -44.32 | 35.5 | HHHHHHHHHHHHHHHHHHHHHHHHHHHCCCCCCC |
| 947 | EEELRKLEQLNNEEQMSYQQQGFQGHDA       | -44.32 | 35.5 | HHHHHHHHHHHHHHHHHHHHHHHHHHHCCCCCCC |
| 927 | EEELRKLEQLNNEEQMRYQREGFGQGHDA      | -44.32 | 35.5 | HHHHHHHHHHHHHHHHHHHHHHHHHHHCCCCCCC |
| 996 | EQELRKLEQLNNEEEMQRYQQQGFQGHDA      | -44.32 | 32.3 | HHHHHHHHHHHHHHHHHHHHHHHHHHHCCCCCCC |
| 330 | EEEWKKLEQLNNEEEMQRYQQQGFQGHDA      | -44.32 | 32.3 | HHHHHHHHHHHCHHHHHHHHHHHHCCCCCCC    |

|     |                                   |        |      |                                  |
|-----|-----------------------------------|--------|------|----------------------------------|
| 167 | EEEWKKFLEKYNNEAEQIYYQONGFGQGHS    | -44.21 | 48.4 | HHHHHHHHHHHHHHHHHHHHHHHHHHHHCCCC |
| 471 | EEEARKFLEKFNNEEQMSYQOQGFQGHDA     | -44.20 | 48.4 | HHHHHHHHHHHHHHHHHHHHHHHHHHHHCCCC |
| 277 | EEELKKILEQLNQEQEQMSYQKEGFGQGDSR   | -44.16 | 45.2 | HHHHHHHHHHHHHHHHHHHHHHHHHHHHCCCC |
| 793 | EEELKKLLEKLNQEEEQMKYQOQGFQGHDA    | -44.15 | 48.4 | HHHHHHHHHHHHHHHHHHHHHHHHHHHHCCCC |
| 124 | EEELRKLEQLNQEEEQMSYQOQGFQGHDA     | -44.15 | 35.5 | HHHHHHHHHHHHHHHHHHHHHHHHHHHHCCCC |
| 492 | EEELKKFLEKFNNEYEMFKQKGFQGHDA      | -44.10 | 48.4 | HHHHHHHHHHHHHHHHHHHHHHHHHHHHCCCC |
| 383 | EEELKKFLEKYNNEAEIRKQOQGFQGHDA     | -44.10 | 45.2 | HHHHHHHHHHHHHHHHHHHHHHHHHHHHCCCC |
| 813 | EEELKKFLEKYNNEAEIRKQOQGFQGHDA     | -44.10 | 45.2 | HHHHHHHHHHHHHHHHHHHHHHHHHHHHCCCC |
| 181 | EEELKKFLEKFNQEYEQMFYQOQGFQGHDA    | -44.09 | 58.1 | HHHHHHHHHHHHHHHHHHHHHHHHHHHHCCCC |
| 643 | EEEARKFLEQYNQEAEQMRYYQOQGFQGHDA   | -44.07 | 45.2 | HHHHHHHHHHHHHHHHHHHHHHHHHHHHCCCC |
| 930 | EEEARFLEQFNQEYEQMFYQOQGFQGHDA     | -44.06 | 48.4 | HHHHHHHHHHHHHHHHHHHHHHHHHHHHCCCC |
| 106 | EEEARKFLEQFNQEYEQMFYQOQGFQGHDA    | -44.06 | 45.2 | HHHHHHHHHHHHHHHHHHHHHHHHHHHHCCCC |
| 408 | EEEARKFLEQLNQEEEQMSYQOQGFQGHDA    | -44.06 | 41.9 | HHHHHHHHHHHHHHHHHHHHHHHHHHHHCCCC |
| 290 | EEEARKFLEQYNQESEQMRYYOQOQGFQGHDA  | -44.06 | 41.9 | HHHHHHHHHHHHHHHHHHHHHHHHHHHHCCCC |
| 439 | EEELKKFLEQFNQEYEQMFYQOQGFQGHDA    | -44.06 | 48.4 | HHHHHHHHHHHHHHHHHHHHHHHHHHHHCCCC |
| 913 | EEELKKFLEQYNQEAEQIYYQONGFGQGHS    | -44.06 | 45.2 | HHHHHHHHHHHHHHHHHHHHHHHHHHHHCCCC |
| 967 | EEELKKFLEQYNQEAEQMRYYOQOQGFQGHDA  | -44.06 | 45.2 | HHHHHHHHHHHHHHHHHHHHHHHHHHHHCCCC |
| 137 | EEELKKFLEQYNQEAEQMRYYOQOQGFQGHDA  | -44.06 | 41.9 | HHHHHHHHHHHHHHHHHHHHHHHHHHHHCCCC |
| 847 | EEELKKFLEQYNQEAEQMRYYOQOQGFQGHDA  | -44.06 | 41.9 | HHHHHHHHHHHHHHHHHHHHHHHHHHHHCCCC |
| 527 | EEELKKFLEKFNNEEQMRYYOQOQGFQGHDA   | -44.05 | 48.4 | HHHHHHHHHHHHHHHHHHHHHHHHHHHHCCCC |
| 142 | EEELKKFLEKYNNEAEQMRYYOQOQGFQGHDA  | -44.05 | 48.4 | HHHHHHHHHHHHHHHHHHHHHHHHHHHHCCCC |
| 728 | EEEWKKFIEKLNNEEQMRYYOQOQGFQGHDA   | -44.05 | 41.9 | HHHHHHHHHHHHHHHHHHHHHHHHHHHHCCCC |
| 804 | EEELKKLLEKLNNEEQEQMRYYOQOQGFQGHDA | -44.04 | 48.4 | HHHHHHHHHHHHHHHHHHHHHHHHHHHHCCCC |
| 693 | EEELRKLLEKLNNEEQEQIRYYOQOQGFQGHDA | -44.04 | 45.2 | HHHHHHHHHHHHHHHHHHHHHHHHHHHHCCCC |
| 729 | EEEARKFLEKYNNEEQMRYYOQOQGFQGHDA   | -43.98 | 51.6 | HHHHHHHHHHHHHHHHHHHHHHHHHHHHCCCC |
| 657 | EEEARKFLEKYNNEAEQMRYYOQOQGFQGHDA  | -43.93 | 48.4 | HHHHHHHHHHHHHHHHHHHHHHHHHHHHCCCC |
| 627 | EEEAKKFLEKYNQEQQEQMSYQOQGFQGHDA   | -43.93 | 48.4 | HHHHHHHHHHHHHHHHHHHHHHHHHHHHCCCC |
| 180 | EEELKKLLEQLNNEKEEMKQKQOQGFQGHDA   | -43.90 | 35.5 | HHHHHHHHHHHHHHHHHHHHHHHHHHHHCCCC |
| 872 | EEELKKLLEQLNNEEQEMKQOQOQGFQGHDA   | -43.90 | 35.5 | HHHHHHHHHHHHHHHHHHHHHHHHHHHHCCCC |
| 725 | EEQLKKLLEQLNNEEQEQIRYYOQOQGFQGHDA | -43.89 | 41.9 | HHHHHHHHHHHHHHHHHHHHHHHHHHHHCCCC |
| 224 | EEELKKLLEKLNNEAEQIRYYOQOQGFQGHDA  | -43.87 | 45.2 | HHHHHHHHHHHHHHHHHHHHHHHHHHHHCCCC |
| 585 | EEELKKLLEKLNNEEQMSYQOQOQGFQGHDA   | -43.85 | 48.4 | HHHHHHHHHHHHHHHHHHHHHHHHHHHHCCCC |
| 325 | EEELRKLLEKLNNEEQMRYYOQOQGFQGHDA   | -43.85 | 45.2 | HHHHHHHHHHHHHHHHHHHHHHHHHHHHCCCC |
| 436 | EEELRKLLEKLNNEEQEQMSYQOQGFQGHDA   | -43.85 | 45.2 | HHHHHHHHHHHHHHHHHHHHHHHHHHHHCCCC |
| 908 | EEELRKLLEKLNNEEQMRYYQKEGFGQGHDA   | -43.85 | 45.2 | HHHHHHHHHHHHHHHHHHHHHHHHHHHHCCCC |
| 386 | EEELRKLLEKLNNEEQMRYYQRYGFGQGHDA   | -43.85 | 45.2 | HHHHHHHHHHHHHHHHHHHHHHHHHHHHCCCC |
| 662 | EEELRKLLEQLNNEEQEQMRYYOQOQGFQGHDA | -43.85 | 35.5 | HHHHHHHHHHHHHHHHHHHHHHHHHHHHCCCC |
| 026 | EEELRKLLEQLNNEEQEQMRYYOQOQGFQGHDA | -43.85 | 35.5 | HHHHHHHHHHHHHHHHHHHHHHHHHHHHCCCC |
| 314 | EEELKKFLEKLNNEEQEQMSYQOQOQGFQGHDA | -43.80 | 51.6 | HHHHHHHHHHHHHHHHHHHHHHHHHHHHCCCC |
| 256 | EEELKKFLEKYNNEEQEQMRYYOQOQGFQGHDA | -43.80 | 51.6 | HHHHHHHHHHHHHHHHHHHHHHHHHHHHCCCC |
| 499 | EEELKKFLEKYNNEEQEQMRYYQREGFGQGHDA | -43.79 | 45.2 | HHHHHHHHHHHHHHHHHHHHHHHHHHHHCCCC |
| 646 | EEEARKFLENYNRYEQDMEYQRTGRGKGHDF   | -43.78 | 45.2 | HHHHHHHHHHHHHHHHHHHHHHHHHHHHCCCC |
| 957 | EEEAKKFLEQFNNEEQEQMSYQOQOQGFQGHDA | -43.76 | 48.4 | HHHHHHHHHHHHHHHHHHHHHHHHHHHHCCCC |
| 863 | EEEAKKFLEQYNNEYEQMFYQOQKGFQGHDA   | -43.76 | 48.4 | HHHHHHHHHHHHHHHHHHHHHHHHHHHHCCCC |
| 376 | EEEARKFLEQFNNEEQEQMSYQOQOQGFQGHDA | -43.76 | 45.2 | HHHHHHHHHHHHHHHHHHHHHHHHHHHHCCCC |
| 280 | EEEARKFLEQFNNEEQEQMSYQOQOQGFQGHDA | -43.76 | 45.2 | HHHHHHHHHHHHHHHHHHHHHHHHHHHHCCCC |
| 204 | EEEARKFLEQFNNEYEQMFYQOQKGFQGHDA   | -43.76 | 48.4 | HHHHHHHHHHHHHHHHHHHHHHHHHHHHCCCC |
| 307 | EEEARKFLEQLNNEEQEQMRYYOQOQGFQGHDA | -43.76 | 41.9 | HHHHHHHHHHHHHHHHHHHHHHHHHHHHCCCC |
| 411 | EEEARKFLEQLNNEEQEQMEYQOQRAFGQGHDA | -43.76 | 41.9 | HHHHHHHHHHHHHHHHHHHHHHHHHHHHCCCC |
| 857 | EEEARKFLEQYNNEAEQIYYQONGFGQGHDA   | -43.76 | 45.2 | HHHHHHHHHHHHHHHHHHHHHHHHHHHHCCCC |
| 584 | EEEARKFLEQYNNEAEQMRYYOQOQGFQGHDA  | -43.76 | 45.2 | HHHHHHHHHHHHHHHHHHHHHHHHHHHHCCCC |
| 271 | EEEARKFLEQYNNEAEQIYYQOQGFQGHDA    | -43.76 | 45.2 | HHHHHHHHHHHHHHHHHHHHHHHHHHHHCCCC |
| 745 | EEEARKFLEQYNNEEQEQMFYQOQKGFQGHDA  | -43.76 | 45.2 | HHHHHHHHHHHHHHHHHHHHHHHHHHHHCCCC |
| 860 | EEEARKFLEQYNNEEQEQMRYYOQOQGFQGHDA | -43.76 | 41.9 | HHHHHHHHHHHHHHHHHHHHHHHHHHHHCCCC |
| 013 | EEEARKFLEQYNNEEQEQMRYYQREGFGQGHDA | -43.76 | 41.9 | HHHHHHHHHHHHHHHHHHHHHHHHHHHHCCCC |
| 739 | EEEARKFLEQYNNEEQEQMRYYQREGFGQGHDA | -43.76 | 41.9 | HHHHHHHHHHHHHHHHHHHHHHHHHHHHCCCC |
| 576 | EEEARKFLEQYNNEEQEQMSYQOQOQGFQGHDA | -43.76 | 41.9 | HHHHHHHHHHHHHHHHHHHHHHHHHHHHCCCC |
| 617 | EEEARKFLEQYNNEAEQIYYQOQGFQGHDA    | -43.76 | 41.9 | HHHHHHHHHHHHHHHHHHHHHHHHHHHHCCCC |
| 797 | EEEARKFLEQYNNEAEQIYYQOQGFQGHDA    | -43.76 | 41.9 | HHHHHHHHHHHHHHHHHHHHHHHHHHHHCCCC |
| 721 | EEEARKFLEQYNNEAEQMRYYOQOQGFQGHDA  | -43.76 | 41.9 | HHHHHHHHHHHHHHHHHHHHHHHHHHHHCCCC |
| 904 | EEEARKFLEQYNNEAEQMFYQOQKGFQGHDA   | -43.76 | 45.2 | HHHHHHHHHHHHHHHHHHHHHHHHHHHHCCCC |
| 628 | EEELKKFLEQFNNEEQEQMTYQRYGFGQGHDA  | -43.76 | 45.2 | HHHHHHHHHHHHHHHHHHHHHHHHHHHHCCCC |
| 017 | EEELKKFLEQFNNEEQEQMFYQOQKGFQGHDA  | -43.76 | 48.4 | HHHHHHHHHHHHHHHHHHHHHHHHHHHHCCCC |
| 479 | EEELKKFLEQFNNEEQEQMFYQOQOQGFQGHDA | -43.76 | 48.4 | HHHHHHHHHHHHHHHHHHHHHHHHHHHHCCCC |
| 286 | EEELKKFLEQLNNEEQEQMRYYOQOQGFQGHDA | -43.76 | 41.9 | HHHHHHHHHHHHHHHHHHHHHHHHHHHHCCCC |
| 332 | EEELKKFLEQLNNEEQEQMRYYOQYGFQGHDA  | -43.76 | 41.9 | HHHHHHHHHHHHHHHHHHHHHHHHHHHHCCCC |
| 776 | EEELKKFLEQYNNEAEQIYYQONGFGQGHDA   | -43.76 | 45.2 | HHHHHHHHHHHHHHHHHHHHHHHHHHHHCCCC |

|     |                                   |        |      |                                             |
|-----|-----------------------------------|--------|------|---------------------------------------------|
| 489 | EEELKKFLEQYNNEAEQMRYQKEGFGQGHDA   | -43.76 | 45.2 | HHHHHHHHHHHHHHHHHHHHHHHHHHHHHHHHHCCCCCCC    |
| 253 | EEELKKFLEQYNNEAEQMRYQQNGFGQGHDA   | -43.76 | 45.2 | HHHHHHHHHHHHHHHHHHHHHHHHHHHHHHHHHCCCCCCC    |
| 379 | EEELKKFLEQYNNEAEQMRYQQQGFQGHDA    | -43.76 | 45.2 | HHHHHHHHHHHHHHHHHHHHHHHHHHHHHHHHHCCCCCCC    |
| 419 | EEELKKFLEQYNNEAEQMRYQRQGFQGHDA    | -43.76 | 45.2 | HHHHHHHHHHHHHHHHHHHHHHHHHHHHHHHHHCCCCCCC    |
| 692 | EEELKKFLEQYNNEEEQMRYQQKGFQGHDA    | -43.76 | 45.2 | HHHHHHHHHHHHHHCHHHHHHHHHHHHHHHHHHHHHCCCCCCC |
| 598 | EEELKKFLEQYNNEEEQMRYQQQGFQGHDA    | -43.76 | 41.9 | HHHHHHHHHHHHHHCHHHHHHHHHHHHHHHHHHHHHCCCCCCC |
| 921 | EEELKKFLEQYNNEEEQMRYQREGFGQGHEA   | -43.76 | 41.9 | HHHHHHHHHHHHHHCHHHHHHHHHHHHHHHHHHHHHCCCCCCC |
| 556 | EEELKKFLEQYNNEEEQMSYQQQGFQGHDA    | -43.76 | 41.9 | HHHHHHHHHHHHHHCHHHHHHHHHHHHHHHHHHHHHCCCCCCC |
| 890 | EEELKKFLEQYNNESEQIRYQQNGFGQGHDA   | -43.76 | 41.9 | HHHHHHHHHHHHHHHHHHHHHHHHHHHHHHHHHCCCCCCC    |
| 104 | EEELKKFLEQYNNESEQMRYQQQGFQGHDF    | -43.76 | 41.9 | HHHHHHHHHHHHHHHHHHHHHHHHHHHHHHHHHCCCCCCC    |
| 292 | EEELKKFLEQYNNESEQMRYQQQGFQGHDA    | -43.76 | 41.9 | HHHHHHHHHHHHHHHHHHHHHHHHHHHHHHHHHCCCCCCC    |
| 019 | EQEARKFLEQYNNEEEQMRYQREGFGQGHDA   | -43.76 | 38.7 | HHHHHHHHHHHHHHCHHHHHHHHHHHHHHHHHHHHHCCCCCCC |
| 938 | EEELKKLLEQINQEAQMRYQRYGFGQGHDA    | -43.70 | 41.9 | HHHHHHHHHHHHHHHHHHHHHHHHHHHHHHHHHCCCCCCC    |
| 707 | EEEARKFLEQFNQYEEMFKQKGFSGKDA      | -43.63 | 45.2 | HHHHHHHHHHHHHHHHHHHHHHHHHHHHHHHHHCCCCCCC    |
| 231 | EEELKKLLEQINNEAEQIRYQQNGFGQGDSR   | -43.59 | 48.4 | HHHHHHHHHHHHHHHHHHHHHHHHHHHHHHHHHCCCCCCC    |
| 401 | EEELKKLLEQINNEEQMRYQQQGFQGDSR     | -43.59 | 45.2 | HHHHHHHHHHHHHHCHHHHHHHHHHHHHHHHHHHHHCCCCCCC |
| 974 | EEELKKLLEQINNEQEQMSYQQQGFQGDSR    | -43.59 | 45.2 | HHHHHHHHHHHHHHHHHHHHHHHHHHHHHHHHHCCCCCCC    |
| 680 | EEELRKLLEQLNNEEQMRYQQQGFQGDSR     | -43.59 | 41.9 | HHHHHHHHHHHHHHHHHHHHHHHHHHHHHHHHHCCCCCCC    |
| 724 | EEEARKFLEKYNQEEEQMRYQREGFGQGDSR   | -43.58 | 51.6 | HHHHHHHHHHHHHHHHHHHHHHHHHHHHHHHHHCCCCCCC    |
| 311 | EEELKKFLEKLNQEEEQMRYQQQGFQGDSR    | -43.58 | 51.6 | HHHHHHHHHHHHHHHHHHHHHHHHHHHHHHHHHCCCCCCC    |
| 912 | EEEARKFLEQLNQEEEQMRYQQYGFQGHDA    | -43.58 | 41.9 | HHHHHHHHHHHHHHHHHHHHHHHHHHHHHHHHHCCCCCCC    |
| 298 | EEEARKFLEQYNQEYEQMRYQRSFGFGQGHDA  | -43.58 | 45.2 | HHHHHHHHHHHHHHHHHHHHHHHHHHHHHHHHHCCCCCCC    |
| 343 | EEELKKFLEQYNQEEEQMRYQREGFGQGHS    | -43.58 | 41.9 | HHHHHHHHHHHHHHHHHHHHHHHHHHHHHHHHHCCCCCCC    |
| 473 | EEELKKLLEKLNQEQEQIRYQQNGFGQGDSR   | -43.48 | 48.4 | HHHHHHHHHHHHHHHHHHHHHHHHHHHHHHHHHCCCCCCC    |
| 811 | EEELRKLEKLNQEQEQIRYQQNGFGQGDSR    | -43.48 | 45.2 | HHHHHHHHHHHHHHHHHHHHHHHHHHHHHHHHHCCCCCCC    |
| 697 | EEEARKFLEKYNQEAQEQRYQQNGFGQGHDA   | -43.43 | 48.4 | HHHHHHHHHHHHHHHHHHHHHHHHHHHHHHHHHCCCCCCC    |
| 208 | EEELKKLLEQINQEAQEQITYQQNGFGQGDSR  | -43.38 | 48.4 | HHHHHHHHHHHHHHHHHHHHHHHHHHHHHHHHHCCCCCCC    |
| 923 | EEELRKLLEQLNQEKEQMSYQQQGFQGDSR    | -43.38 | 41.9 | HHHHHHHHHHHHHHHHHHHHHHHHHHHHHHHHHCCCCCCC    |
| 063 | EEEARKMLEQINNEEQEQIRYQQQGFQGHDA   | -43.37 | 38.7 | HHHHHHHHHHHHHHHHHHHHHHHHHHHHHHHHHCCCCCCC    |
| 320 | EEEARKMLEQINNEEQEQMRYQQQGFQGHDA   | -43.37 | 38.7 | HHHHHHHHHHHHHHHHHHHHHHHHHHHHHHHHHCCCCCCC    |
| 592 | EEEARKFLEQYNNEAEEIYKQNGFGSGKDA    | -43.34 | 41.9 | HHHHHHHHHHHHHHHHHHHHHHHHHHHHHHHHHCCCCCCC    |
| 350 | EEEARKFLEKFNNEAEQIMRYQQKGFQGDSR   | -43.29 | 54.8 | HHHHHHHHHHHHHHHHHHHHHHHHHHHHHHHHHCCCCCCC    |
| 871 | EEEARKFLEKLNNEEQEQMRYQREGFGQGDSR  | -43.29 | 51.6 | HHHHHHHHHHHHHHHHHHHHHHHHHHHHHHHHHCCCCCCC    |
| 025 | EEEARKFLEKYNNEAEQIRYQQNGFGQGDSR   | -43.29 | 54.8 | HHHHHHHHHHHHHHHHHHHHHHHHHHHHHHHHHCCCCCCC    |
| 005 | EEEARKFLEKYNNEAEQIYYQQNGFGQGDDR   | -43.29 | 54.8 | HHHHHHHHHHHHHHHHHHHHHHHHHHHHHHHHHCCCCCCC    |
| 178 | EEELKKFLEKLNNEEQEQMRYQRSFGFGQGDSR | -43.29 | 54.8 | HHHHHHHHHHHHHHCHHHHHHHHHHHHHHHHHHHHHCCCCCCC |
| 924 | EEELKKFLEKLNNEEQEQMRYQQQGFQGDSR   | -43.29 | 51.6 | HHHHHHHHHHHHHHCHHHHHHHHHHHHHHHHHHHHHCCCCCCC |
| 779 | EEELKKFLEKLNNEKEQIYBQRKGFQGDSR    | -43.29 | 51.6 | HHHHHHHHHHHHHHHHHHHHHHHHHHHHHHHHHCCCCCCC    |
| 603 | EEELKKFLEKYNNEAEQIYYQQNGFGQGDSR   | -43.29 | 54.8 | HHHHHHHHHHHHHHHHHHHHHHHHHHHHHHHHHCCCCCCC    |
| 100 | EEELKKFLEKYNNESEQIRYQQQGFQGGDDR   | -43.29 | 51.6 | HHHHHHHHHHHHHHHHHHHHHHHHHHHHHHHHHCCCCCCC    |
| 267 | EEELKKFLEQYNNEAEQIYYQQNGCGQGHDY   | -43.29 | 45.2 | HHHHHHHHHHHHHHHHHHHHHHHHHHHHHHHHHCCCCCCC    |
| 951 | EEELKKFLEQYNNEAEQMRYQQGFGFGQGHDF  | -43.29 | 45.2 | HHHHHHHHHHHHHHHHHHHHHHHHHHHHHHHHHCCCCCCC    |
| 229 | EEELKKFLEQLNQEEEQMRYQQQGFQGDSR    | -43.25 | 48.4 | HHHHHHHHHHHHHHHHHHHHHHHHHHHHHHHHHCCCCCCC    |
| 236 | EEELKEFLKQYNEEAEDIYYQQNGFGKGDSDR  | -43.25 | 58.1 | HHHHHHHHHHHHHHHHHHHHHHHHHHHHHHHHHCCCCCCC    |
| 669 | EEEARKFLEKYNNEAEQIRYQQQGFQGDSR    | -43.20 | 51.6 | HHHHHHHHHHHHHHCHHHHHHHHHHHHHHHHHHHHHCCCCCCC |
| 887 | EEELKKLLEKLNNEEQEQIKYQQNGFGQGDSR  | -43.18 | 48.4 | HHHHHHHHHHHHHHCHHHHHHHHHHHHHHHHHHHHHCCCCCCC |
| 614 | EEELKKLLEKLNNEEQEQMRYQQNGFGQGDDR  | -43.18 | 48.4 | HHHHHHHHHHHHHHHHHHHHHHHHHHHHHHHHHCCCCCCC    |
| 333 | EEEARKFLQYNNEAEQMRYQQQGFQGHDA     | -43.12 | 45.2 | HHHHHHHHHHHHHHHHHHHHHHHHHHHHHHHHHCCCCCCC    |
| 942 | EEELKKFLQYNNEEQEQMSYQKEGFGQGHDA   | -43.12 | 41.9 | HHHHHHHHHHHHHHHHHHHHHHHHHHHHHHHHHCCCCCCC    |
| 613 | EQELRKLLEQINNEEQEQMRYQQQGFQGDSR   | -43.10 | 38.7 | HHHHHHHHHHHHHHHHHHHHHHHHHHHHHHHHHCCCCCCC    |
| 030 | EEELRKLLEQINNEAEQMSYQQQGFQGHDA    | -43.10 | 38.7 | HHHHHHHHHHHHHHHHHHHHHHHHHHHHHHHHHCCCCCCC    |
| 268 | EEELKKLLEQINNEAEQMRYQQNGFGQGDSR   | -43.09 | 48.4 | HHHHHHHHHHHHHHHHHHHHHHHHHHHHHHHHHCCCCCCC    |
| 609 | EEELKKLLEQINNEEQEQMRYQQYGFQGDSR   | -43.09 | 45.2 | HHHHHHHHHHHHHHCHHHHHHHHHHHHHHHHHHHHHCCCCCCC |
| 099 | EEELKKLLEQLNNEKEQMSYQQQGFQGDSR    | -43.09 | 45.2 | HHHHHHHHHHHHHHHHHHHHHHHHHHHHHHHHHCCCCCCC    |
| 359 | EEELRKLLEQINNEAEQMRYQRQGFQGDSR    | -43.09 | 45.2 | HHHHHHHHHHHHHHHHHHHHHHHHHHHHHHHHHCCCCCCC    |
| 105 | EEELRKLLEQINNEEQEQMRYQQQGFQGDSR   | -43.09 | 41.9 | HHHHHHHHHHHHHHCHHHHHHHHHHHHHHHHHHHHHCCCCCCC |
| 759 | EEELRKLLEQINNEEQEQMRYQQYGFQGDSR   | -43.09 | 41.9 | HHHHHHHHHHHHHHCHHHHHHHHHHHHHHHHHHHHHCCCCCCC |
| 396 | EEELRKLLEQLNNEKEQMSYQQQGFQGDSR    | -43.09 | 41.9 | HHHHHHHHHHHHHHHHHHHHHHHHHHHHHHHHHCCCCCCC    |
| 929 | EEELKKFLEKLNNEAEQIMRYQRAFGQGDSR   | -43.08 | 54.8 | HHHHHHHHHHHHHHHHHHHHHHHHHHHHHHHHHCCCCCCC    |
| 176 | EEEARKFLEQFNNEEQEQMSYQQQGFQGDSR   | -43.03 | 51.6 | HHHHHHHHHHHHHHHHHHHHHHHHHHHHHHHHHCCCCCCC    |
| 140 | EEEARKFLEQYNNEAEQMRYQQQGFQGDSR    | -43.03 | 51.6 | HHHHHHHHHHHHHHHHHHHHHHHHHHHHHHHHHCCCCCCC    |
| 812 | EEELKKFLEQYNNEAEQMRYQQNGFGQGDSR   | -43.03 | 51.6 | HHHHHHHHHHHHHHHHHHHHHHHHHHHHHHHHHCCCCCCC    |
| 344 | EEELKKFLEQYNNEEQEQMSYQQNGFGQGDSR  | -43.03 | 48.4 | HHHHHHHHHHHHHHCHHHHHHHHHHHHHHHHHHHHHCCCCCCC |
| 347 | EEELKKFLEQYNNEYEQMEYQRSFGFGQGDSR  | -43.03 | 51.6 | HHHHHHHHHHHHHHHHHHHHHHHHHHHHHHHHHCCCCCCC    |
| 695 | EEELKKFLEKYNQEEEQRRYQQQGFQGHDA    | -42.95 | 45.2 | HHHHHHHHHHHHHHCHHHHHHHHHHHHHHHHHHHHHCCCCCCC |
| 666 | EEEARKFLEQYNNEYEQMEYQRTGRGQGHDF   | -42.84 | 41.9 | HHHHHHHHHHHHHHHHHHHHHHHHHHHHHHHHHCCCCCCC    |
| 841 | EEEARKFLEQFNQEEEQMSYQQNGFGQGDSR   | -42.82 | 51.6 | HHHHHHHHHHHHHHHHHHHHHHHHHHHHHHHHHCCCCCCC    |
